# Supplementary material for: Photo- and Metal-Mediated Deconstructive Approaches to Cyclic Aliphatic Amine Diversification
Source: PubMed Central journal article supplement (PMC10214453; doi:10.1021/jacs.3c01318), 2023-05-12
Supplement: ja3c01318_si_001.pdf [file ja3c01318_si_001.pdf]

# Photo- and Metal-Mediated Deconstructive Approaches to Cyclic Aliphatic Amine Diversification

David M. Soro,<sup>||,◇</sup> Jose B. Roque,<sup>||,◇</sup> Jonas W. Rackl,<sup>||</sup> Bohyun Park,<sup>‡,‡</sup> Stefan Payer,<sup>||</sup> Yuan Shi,<sup>§</sup> J. Craig Ruble,<sup>§</sup> Alexey L. Kaledin,<sup>†</sup> Mu-Hyun Baik,<sup>\*,‡,‡</sup> Djamaladdin G. Musaev,<sup>\*,†</sup> Richmond Sarpong<sup>||\*</sup>

<sup>||</sup> Department of Chemistry, University of California, Berkeley, CA 94720, United States

<sup>†</sup>Cherry L. Emerson Center for Scientific Computation, and Department of Chemistry, Emory University, 1521 Dickey Drive, Atlanta, GA, 30322, United States

<sup>‡</sup>Department of Chemistry, Korea Advanced Institute of Science and Technology (KAIST), Daejeon 34141, Korea

<sup>‡</sup>Center for Catalytic Hydrocarbon Functionalizations, Institute for Basic Science (IBS), Daejeon 34141, Korea

<sup>§</sup>Discovery Chemistry Research and Technologies, Eli Lilly and Company, Indianapolis, Indiana 46285, United States

## Table of Contents

|                                                                                                 |     |
|-------------------------------------------------------------------------------------------------|-----|
| <b>1. General Information</b> .....                                                             | S4  |
| 1.1 Solvents and Reagents.....                                                                  | S4  |
| 1.2 Experimental Procedures.....                                                                | S4  |
| 1.3 Analytical Instrumentation.....                                                             | S4  |
| <b>2. Experimental Procedures</b> .....                                                         | S5  |
| 2.1 Preparation of N-Protected Cyclic Amines.....                                               | S5  |
| 2.2 Preparation of Photocatalyst <b>2a</b> (Riboflavin Tetraacetate, RFTA) .....                | S11 |
| 2.3 Experimental Setup of Photoreactor.....                                                     | S12 |
| 2.4 Photochemical Method Optimization.....                                                      | S13 |
| 2.5 Experiments to Probe Triplet Energy Transfer Mechanism.....                                 | S19 |
| 2.6 Kinetics Experiments.....                                                                   | S20 |
| 2.7 Procedure for Riboflavin Tetraacetate-Mediated Ring Opening.....                            | S22 |
| 2.8 Procedure for Copper-Mediated Ring Opening.....                                             | S30 |
| 2.9 Procedures for Peptide Diversification.....                                                 | S37 |
| 2.10 Procedure for Deconstructive Minisci Reaction.....                                         | S40 |
| 2.11 Procedure for Autocyclization Reaction.....                                                | S44 |
| 2.12 Counterion Effect for Autocyclization Reaction.....                                        | S45 |
| <b>3. Computational Details</b> .....                                                           | S46 |
| 3.1 General Computational Considerations for Photo- and Copper-Mediated Reactions.....          | S46 |
| 3.2 Critical Interactions in $\{(2.A.m)-[K_2S_2O_8]\}$ and $\{(2.A.m)-[K_2S_2O_8]\}-(1a)$ ..... | S47 |
| 3.3 Verification of Photocatalyst Model.....                                                    | S48 |
| 3.4 Computed Reaction Mechanism for Photo-Mediated Reaction.....                                | S52 |
| 3.5 Optimized Structure Energy Components for Photo-Mediated Reaction.....                      | S53 |
| 3.6 Optimized Structures and Energy Components for Copper-Mediated Reaction.....                | S54 |
| 3.7 General Computational Considerations for Computations in Figure 13.....                     | S55 |
| 3.8 Reaction Rate Comparison Between <b>11-TS</b> and <b>11-TS'</b> .....                       | S56 |
| 3.9 Energy Components for Optimized Structures in Figure 13.....                                | S57 |
| <b>4. X-ray Crystallographic Data</b> .....                                                     | S58 |
| 4.1 X-ray Analysis of 10m.....                                                                  | S58 |
| <b>5. NMR Spectral Data</b> .....                                                               | S63 |

|                                                                      |             |
|----------------------------------------------------------------------|-------------|
| <b>6. Computational Coordinates and Vibrational Frequencies.....</b> | <b>S126</b> |
| <b>7. References.....</b>                                            | <b>S148</b> |

## 1. General Considerations

### 1.1 Solvents and Reagents

Tetrahydrofuran (THF) and triethylamine (Et<sub>3</sub>N) were sparged with argon and dried by passing through alumina columns using argon in a Glass Contour solvent purification system. Dichloromethane (CH<sub>2</sub>Cl<sub>2</sub>) was freshly distilled over calcium hydride under a N<sub>2</sub> atmosphere prior to each use. DMF was purchased in Aldrich Sure/Seal™ bottles. N-Boc-piperidine (**1a.a**) was obtained from Aldrich and used as received. Reagents were purchased from commercial vendors as follows: Riboflavin (RTA, 98%) was purchased from Alfa Aesar. Silver nitrate (AgNO<sub>3</sub>, ≥99%) was purchased from Sigma-Aldrich. Ammonium persulfate ((NH<sub>4</sub>)<sub>2</sub>S<sub>2</sub>O<sub>8</sub>, ACS Reagent) was purchased from J. T. Baker Chemicals, potassium persulfate (K<sub>2</sub>S<sub>2</sub>O<sub>8</sub>, ACS Reagent) was purchased from Fisher Scientific, and sodium persulfate (Na<sub>2</sub>S<sub>2</sub>O<sub>8</sub>, 98+%) was purchased from Acros Organics. Acetonitrile (HPLC), acetone (HPLC) and water (HPLC) were purchased from Fisher Scientific.

### 1.2 Experimental Procedures

Unless otherwise noted in the experimental procedures, reactions were carried out in flame or oven-dried glassware under a positive pressure of N<sub>2</sub> in anhydrous solvents using standard Schlenk techniques. Reaction temperatures above room temperature (22–23 °C) were controlled by an IKA® temperature modulator and monitored using liquid-in-glass thermometers. Reaction progress was monitored using a combination of LC/MS analysis (using a Shimadzu LCMS-2020 (UFLC) equipped with the LC-20AD solvent delivery system, a SPD-20AV prominence UV/Vis detector (SPD-M20A Photo Diode Array), and a Thermo Scientific Hypersil GOLD HPLC column (5 μm particle size, 4.6 × 50 mm)), and thin-layer chromatography (TLC) on Macherey-Nagel (MN) silica gel plates (glass backed, 60 Å, 0.25 mm thickness, UV254 manganese-activated zinc silicate fluorescence indicator). Visualization of the developed plates was performed under UV-light (254 nm) irradiation, and then gently heated with *p*-anisaldehyde or cerium ammonium molybdate (CAM) stain. Flash column chromatography was performed with either glass columns using Silicycle silica gel (40–63 μm particle size) or using a Yamazen Smart Flash EPCLC W-Prep 2XY (dual channel) automated flash chromatography system on prefilled, premium, universal columns using ACS grade solvents. Preparative thin layer chromatography was performed on SiliCycle Siliaplates (glass backed, extra hard layer, 60 Å, 250 μm thickness, F254 indicator).

### 1.3 Analytical Instrumentation

<sup>1</sup>H NMR and <sup>13</sup>C NMR data were recorded on Bruker AVQ-400, AVB-400, AV-600 and AV-700 spectrometers using CDCl<sub>3</sub> as solvent, typically at 20–23 °C. Chemical shifts (δ) are reported in ppm relative to the residual solvent signal (δ 7.26 for <sup>1</sup>H NMR, δ 77.16 for <sup>13</sup>C NMR in CDCl<sub>3</sub>). <sup>19</sup>F NMR spectra were acquired on an AVQ-400 spectrometer and internally referenced to CFC<sub>3</sub> (δ 0.00). Data for <sup>1</sup>H and <sup>13</sup>C spectroscopy are reported as follows; chemical shift (δ ppm), multiplicity (s = singlet, d = doublet, t = triplet, q = quartet, quint = quintet, hept = heptet, m = multiplet, br = broad), coupling constant (Hz), integration. Melting points were determined using a MEL-TEMP™ apparatus and are uncorrected. High-resolution mass spectra (HRMS) were analyzed as MeOH solutions (30–50 μM) using a Finnigan LTQ FT mass spectrometer (Thermo). Solutions were injected directly into the ion source via syringe pump with 5 μL/min flow rate. Xcalibur software (version 2.0.7, Thermo) was used for both spectra acquisition and data analysis.

## 2. Experimental Procedures

### 2.1 Preparation of *N*-Protected Cyclic Amines

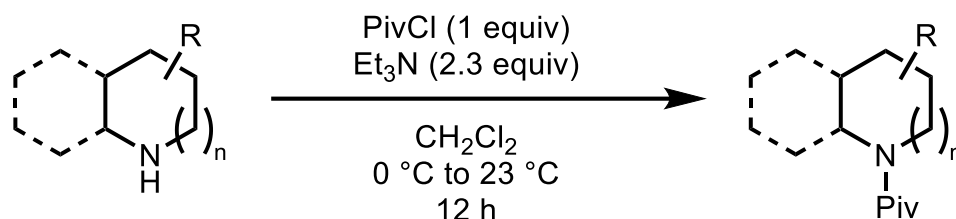

A 25 mL round-bottomed flask was charged with a solution of the cyclic amine (500 mg, 1.0 equiv) and Et<sub>3</sub>N (2.3 equiv) in CH<sub>2</sub>Cl<sub>2</sub> (20 mL) and cooled to 0 °C. Pivaloyl chloride (1.1 equiv) was added dropwise. The resulting mixture was allowed to warm to room temperature and stirred for 12 h, after which the reaction mixture was quenched with HCl (1M, 5 mL). The phases were separated, and the aqueous phase was extracted with CH<sub>2</sub>Cl<sub>2</sub> (3 x 5–10 mL). The combined organic layers were washed with brine (5–10 mL), dried over Na<sub>2</sub>SO<sub>4</sub>, filtered, and concentrated under reduced pressure.

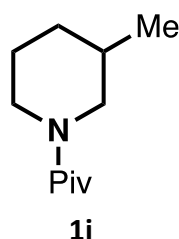

**2,2-Dimethyl-1-(3-methylpiperidin-1-yl)propan-1-one (1i):** The title compound was prepared according to the general procedure using 3-methylpiperidine to give **1i** (644mg, 81%) as a colorless to slight yellowish liquid.

**<sup>1</sup>H NMR** (400 MHz, CDCl<sub>3</sub>): δ 4.28 (dd, *J* = 30.5, 13.2 Hz, 2H), 2.72 (t, *J* = 12.1 Hz, 1H), 2.41 (t, *J* = 12.0 Hz, 1H), 1.9 – 1.74 (m, 1H), 1.73 – 1.61 (m, 1H), 1.61 – 1.37 (m, 2H), 1.27 (s, 9H), 1.13 – 1.05 (m, 1H), 0.89 (d, *J* = 6.6 Hz, 3H);

**<sup>13</sup>C NMR** (126 MHz, CDCl<sub>3</sub>) δ 176.2, 38.9, 38.5, 33.44, 31.7, 28.6, 27.2, 25.8, 19.2;

**HRMS** (ESI): Calc'd for C<sub>11</sub>H<sub>22</sub>NO [M+H]<sup>+</sup>: 184.1696, found: 186.1695.

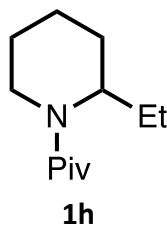

**1-(2-ethylpiperidin-1-yl)-2,2-dimethylpropan-1-one (1h):** The title compound was prepared according to the general procedure using 2-ethylpiperidine to give **1h** (854 mg, 98%) as a slight yellowish liquid.

**<sup>1</sup>H NMR** (400 MHz, CDCl<sub>3</sub>): δ 4.67 (s, 1H), 4.01 (s, 1H), 2.98 (s, 1H), 1.70 – 1.51 (m, 6H), 1.49 – 1.31 (m, 2H), 1.25 (s, 9H), 0.83 (t, *J* = 7.3 Hz, 3H);

**<sup>13</sup>C NMR** (126 MHz, CDCl<sub>3</sub>) δ 176.6, 39.0, 28.7, 27.3, 26.3, 22.5, 19.2, 10.7

(Two  $^{13}\text{C}$  signals are missing due to peak broadening);

HRMS (ESI): Calc'd for  $\text{C}_{12}\text{H}_{24}\text{NO}$   $[\text{M}+\text{H}]^+$ : 198.1852, found: 198.1852.

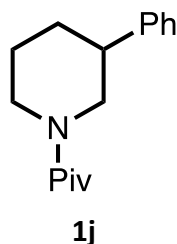

**2,2-dimethyl-1-(3-phenylpiperidin-1-yl)propan-1-one (1j):** The title compound was prepared according to the general procedure using 3-phenylpiperidine (250 mg, 1.55 mmol, 1 equiv) to give **1j** (378 mg, 99%) as a slight yellowish liquid.

$^1\text{H NMR}$  (400 MHz,  $\text{CDCl}_3$ ):  $\delta$  7.37 – 7.29 (m, 2H), 7.27 – 7.20 (m, 3H), 4.52 (t,  $J = 15.3$  Hz, 2H), 2.85 – 2.62 (m, 3H), 2.11 – 2.00 (m, 1H), 1.88 – 1.77 (m, 1H), 1.76 – 1.67 (m, 1H), 1.66 – 1.53 (m, 1H), 1.30 (s, 9H);

$^{13}\text{C NMR}$  (126 MHz,  $\text{CDCl}_3$ )  $\delta$  176.4, 143.4, 128.8, 127.2, 126.9, 43.4, 39.00, 32.1, 28.6, 26.1 (Two  $^{13}\text{C}$  signals are missing due to peak broadening);

HRMS (ESI): Calc'd for  $\text{C}_{16}\text{H}_{24}\text{NO}$   $[\text{M}+\text{H}]^+$ : 246.1852, found: 246.1852.

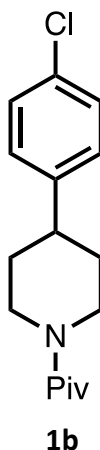

**1-(4-(4-chlorophenyl)piperidin-1-yl)-2,2-dimethylpropan-1-one (1b):** The title compound was prepared according to the general procedure using 4-(4-chlorophenyl)piperidine (250 mg, 1.28 mmol, 1 equiv) to give **1b** (300 mg, 84%) as a slight brownish-yellowish liquid.

$^1\text{H NMR}$  (400 MHz,  $\text{CDCl}_3$ ):  $\delta$  7.32 – 7.24 (m, 3H), 7.17 – 7.09 (m, 2H), 4.57 (d,  $J = 13.3$  Hz, 2H), 2.86 (t,  $J = 13.0$  Hz, 2H), 2.74 (tt,  $J = 12.1, 3.8$  Hz, 1H), 1.87 (d,  $J = 13.5$  Hz, 2H), 1.66 – 1.51 (m, 2H), 1.31 (s, 9H);

$^{13}\text{C NMR}$  (126 MHz,  $\text{CDCl}_3$ )  $\delta$  176.5, 149.6, 129.2, 125.5, 117.8, 49.7, 45.0, 28.5. (Three  $^{13}\text{C}$  signals are missing due to peak broadening);

HRMS (ESI): Calc'd for  $\text{C}_{16}\text{H}_{23}\text{NOCl}$   $[\text{M}+\text{H}]^+$ : 280.1463, found: 280.1461.

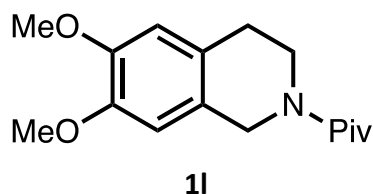

**1-(6,7-dimethoxy-3,4-dihydroisoquinolin-2(1H)-yl)-2,2-dimethylpropan-1-one (1l):** The title compound was prepared according to the general procedure using 6,7-dimethoxy-1,2,3,4-tetrahydroisoquinoline (250 mg, 1.55 mmol, 1 equiv) to give **1l** (378 mg, 99%) as a slight yellowish liquid.

**<sup>1</sup>H NMR** (500 MHz, CDCl<sub>3</sub>) δ 6.61 (s, 1H), 6.59 (s, 1H), 4.67 (s, 1H), 4.09 – 3.68 (m, 8H), 2.80 (t, J = 6.1 Hz, 2H), 1.31 (s, 9H).

**<sup>13</sup>C NMR** (126 MHz, CDCl<sub>3</sub>) δ 176.8, 147.9, 147.8, 126.3, 125.5, 111.5, 109.2, 56.1, 56.1, 47.2, 43.6, 38.9, 28.6, 28.5.

**HRMS** (ESI): Calc'd for C<sub>16</sub>H<sub>24</sub>NO<sub>3</sub> [M+H]<sup>+</sup>: 278.1751, found: 278.1750.

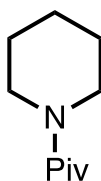

**2,2-dimethyl-1-(piperidin-1-yl)propan-1-one (1b)** was prepared according to a published procedure.<sup>1</sup> Spectral data were in full agreement with the reported literature values.

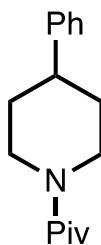

**2,2-dimethyl-1-(4-phenylpiperidin-1-yl)propan-1-one (1e)** was prepared according to a published procedure.<sup>2</sup> Spectral data were in full agreement with the reported literature values.

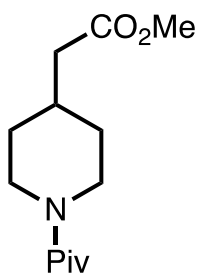

**1f**

**Methyl 2-(1-pivaloylpiperidin-4-yl)acetate (1f)** was prepared according to a published procedure. Spectral data were in full agreement with the reported literature values.<sup>3</sup>

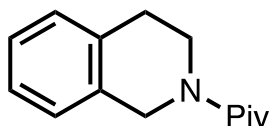

**1k**

**1-(3,4-dihydroisoquinolin-2(1H)-yl)-2,2-dimethylpropan-1-one (1k)** was prepared according to a published procedure.<sup>4</sup> Spectral data were in full agreement with the reported literature values.

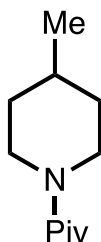

**1d**

**2,2-dimethyl-1-(4-methylpiperidin-1-yl)propan-1-one (1d)** was prepared according to a published procedure.<sup>3</sup> Spectral data were in full agreement with the reported literature values.

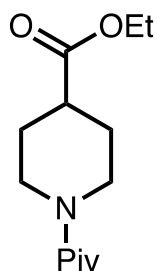

**1e**

**Ethyl 1-pivaloylpiperidine-4-carboxylate (1e)** was prepared according to a published procedure.<sup>3</sup> Spectral data were in full agreement with the reported literature values.



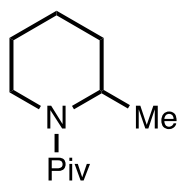

**1g**

**2,2-dimethyl-1-(2-methylpiperidin-1-yl)propan-1-one (1g)** was prepared according to a published procedure.<sup>3</sup> Spectral data were in full agreement with the reported literature values.

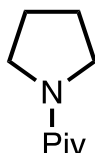

**1m**

**2,2-dimethyl-1-(pyrrolidin-1-yl)propan-1-one (1m)** was prepared according to a published procedure.<sup>5</sup> Spectral data were in full agreement with the reported literature values.

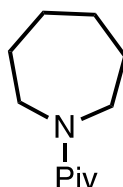

**1n**

**1-(azepan-1-yl)-2,2-dimethylpropan-1-one (1n)** was prepared according to a published procedure.<sup>3</sup> Spectral data were in full agreement with the reported literature values.

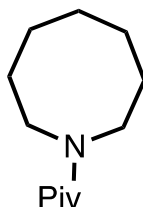

**1o**

**1-(azocan-1-yl)-2,2-dimethylpropan-1-one (1o)** was prepared according to a published procedure.<sup>3</sup> Spectral data were in full agreement with the reported literature values.

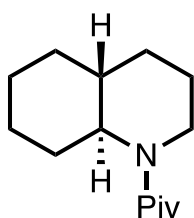

**1p**

**2,2-dimethyl-1-((4aR,8aS)-octahydroquinolin-1(2H)-yl)propan-1-one (1p)** was prepared according to a published procedure.<sup>3</sup> Spectral data were in full agreement with the reported literature values.

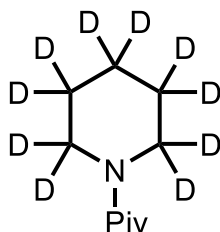

**1a-d<sub>10</sub>**

**2,2-dimethyl-1-(piperidin-1-yl-d<sub>10</sub>)propan-1-one (1a-d<sub>10</sub>)**: The title compound was prepared according to the general procedure using piperidine-d<sub>11</sub> to give **1a-d<sub>10</sub>** (881 mg, 95%) as a colorless liquid.

<sup>1</sup>H NMR (500 MHz, CDCl<sub>3</sub>) δ 1.24 (s, 9H);

<sup>13</sup>C NMR (126 MHz, CDCl<sub>3</sub>) δ 176.2, 45.8 – 45.0 (m), 38.7, 28.5, 25.7 – 24.7 (m), 23.8 – 23.2 (m).

HRMS (ESI): Calc'd for C<sub>16</sub>H<sub>24</sub>NO<sub>2</sub> [M+H]<sup>+</sup>: 180.2168, found: 180.2167.

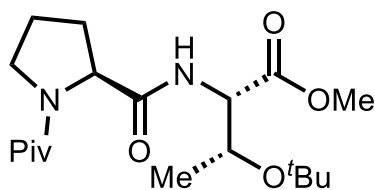

**5a**

**Methyl O-(tert-butyl)-N-(pivaloyl-L-prolyl)-L-threoninate (5a)** was prepared according to a published procedure.<sup>3</sup> Spectral data were in full agreement with the reported literature values.

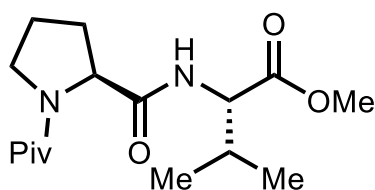

**5b**

**Methyl pivaloyl-L-prolyl-L-valinate (5b)** was prepared according to a published procedure.<sup>3</sup> Spectral data were in full agreement with the reported literature values.

## 2.2 Preparation of Photocatalyst 2a (Riboflavin Tetraacetate, RFTA)

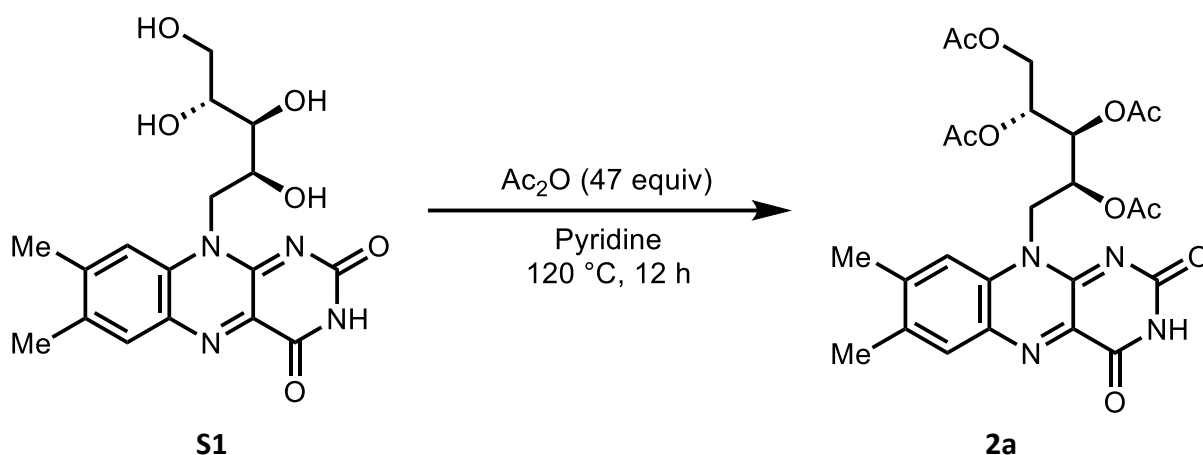

**(2R,3S,4S)-5-(7,8-dimethyl-2,4-dioxo-3,4-dihydrobenzo[*g*]pteridin-10(2H)-yl)pentane-1,2,3,4-tetraol tetraacetate (2a):** (–)-Riboflavin (**S1**) (10.0 g, 26.6 mmol, 1 equiv) was dissolved in pyridine (120 mL) and acetic anhydride (118 mL, 47 equiv) was added. The resulting reaction mixture was stirred at reflux (120 °C) over night (12 h) and then cooled to room temperature, diluted with CH<sub>2</sub>Cl<sub>2</sub> (200 mL) and poured into ice cold HCl (aq., 1M, 200 mL). The aqueous and organic layer were separated, the aqueous phase extracted with CH<sub>2</sub>Cl<sub>2</sub> (3 x 100 mL) and the combined organic layers washed with HCl (aq., 1 M, 100 mL) and water (100 mL), dried over Na<sub>2</sub>SO<sub>4</sub> and concentrated in *vacuo*. Purification of the crude product via column chromatography (10% MeOH/CH<sub>2</sub>Cl<sub>2</sub>) afforded the title compound (**2a**) as yellow-brown solid (5.30 g, 37%).

Spectral data were in full agreement with the reported literature values.<sup>6</sup>

### 2.3 Experimental Setup of Photoreactor

Photochemical reactions were performed either in an air-cooled photobox lined with aluminum foil using a blue Kessil brand A160WE Tuna Blue LED 40 W lamp (Figure S1), or the commercially marketed *Penn PhD Photoreactor M2* (450 nm).

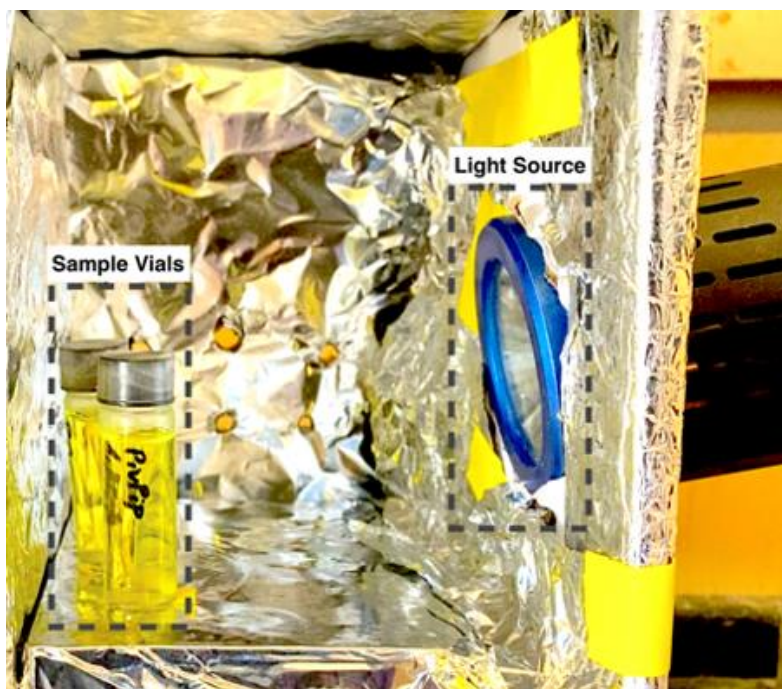

**Figure S1.** Photoreactor setup using a blue Kessil brand A160WE Tuna Blue LED 40 W lamp.

## 2.4 Photochemical Method Optimization

### Representative Procedure for Photocatalyst Screening

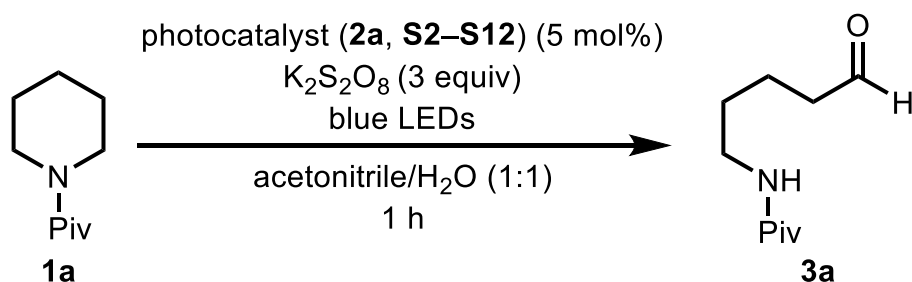

To a 2-dram vial was added sequentially piperidine **1a** (50.7 mg, 0.30 mmol, 1 equiv), potassium persulfate (243 mg, 0.60 mmol, 3 equiv), photocatalyst (**2a**, **S1 – S11**) (5 mol%) and 15 ml of a 1:1 acetonitrile: $H_2O$  solution. The resulting mixture was sparged with nitrogen for 10 min and subsequently transferred to the photoreactor, exposed to a blue Kessil brand A160WE Tuna Blue LED 40 W lamp and cooled with an airstream. After 1 h, the reaction mixture was partitioned with DCM (5 ml) and the phases were separated. The aqueous phase was extracted with DCM (4 X 5 ml) and the combined organic layers dried over  $Na_2SO_4$  and concentrated under nitrogen.  $(C_6H_5)_3CH$  (0.1 mmol, 24.4 mg) was added as NMR standard to the crude reaction product and the yield and conversion determined using  $^1H$ -NMR (pg. S69–S70).

**Table S1.** Results of photocatalyst screening.

| entry | catalyst   | yield [%] <sup>#</sup> | conv. [%] <sup>#</sup> |
|-------|------------|------------------------|------------------------|
| 1     | <b>2a</b>  | 70 (4)                 | 79                     |
| 2     | <b>S2</b>  | 9 (0)                  | 28                     |
| 3     | <b>S3</b>  | 10 (1)                 | 86                     |
| 4     | <b>S4</b>  | 7 (0)                  | 23                     |
| 5     | <b>S5</b>  | 30 (9)                 | 93                     |
| 6     | <b>S6</b>  | 5 (0)                  | 48                     |
| 7     | <b>S7</b>  | 36 (9)                 | 74                     |
| 8     | <b>S8</b>  | 10 (2)                 | 35                     |
| 9     | <b>S9</b>  | 34 (17)                | 69                     |
| 10    | <b>S10</b> | 29 (11)                | 91                     |
| 11    | <b>S11</b> | 25 (3)                 | 37                     |
| 12    | <b>S12</b> | 38 (10)                | 71                     |

<sup>#</sup> Yield and conversion by  $^1H$  integration using  $Ph_3CH$  as internal standard. Yield of carboxylic acid shown in parentheses.

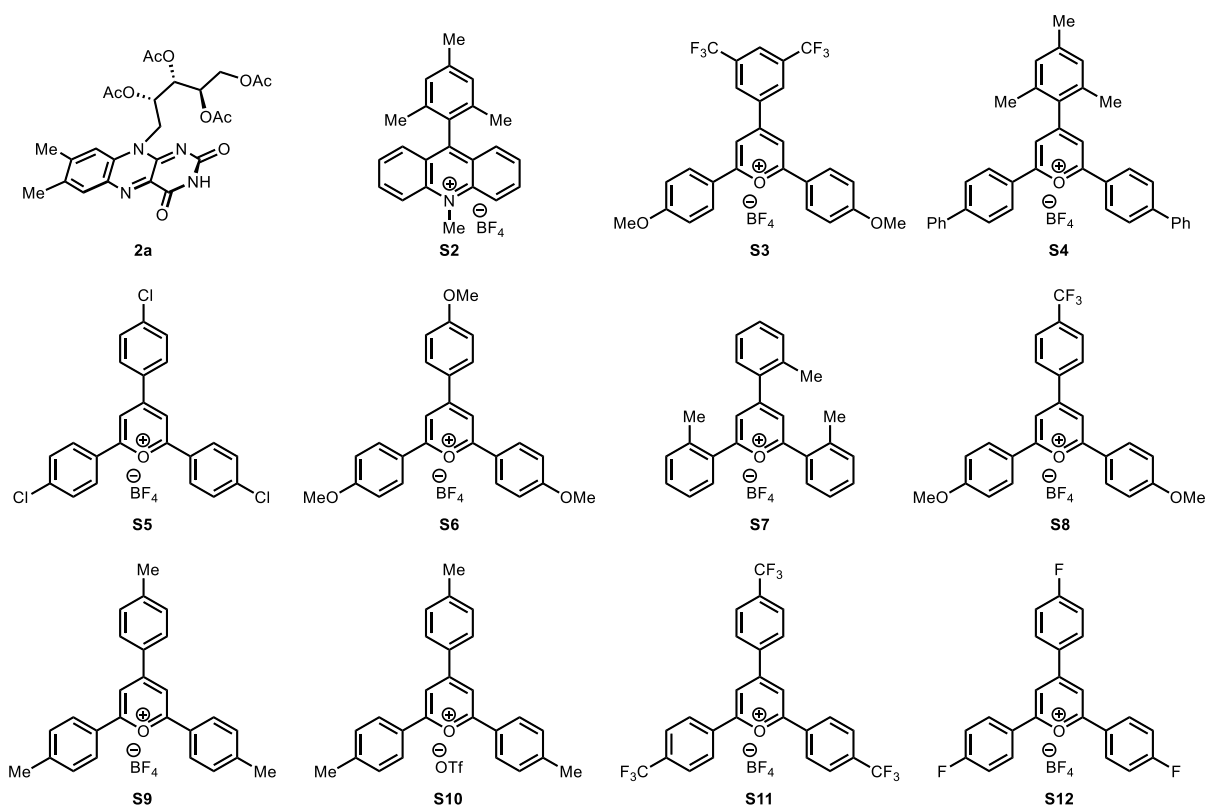

**Figure S2.** Photocatalysts used for optimization studies.

### Photochemical Method – Optimization of Reaction Time

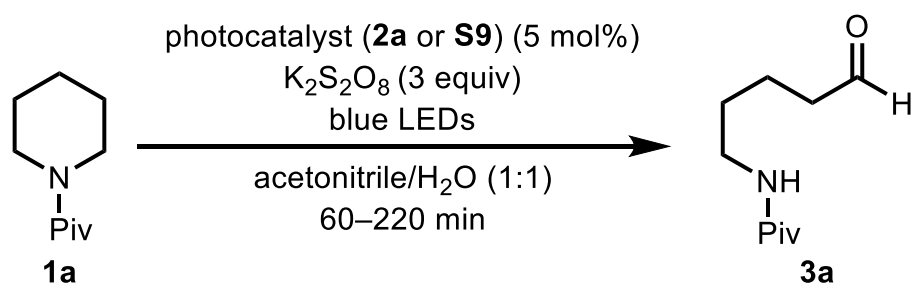

To a 2-dram vial was added, sequentially, piperidine **1a** (50.7 mg, 0.30 mmol, 1 equiv), potassium persulfate (243 mg, 0.60 mmol, 3 equiv), photocatalyst **2a** or **S9** (5 mol%) and 15 ml of a 1:1 acetonitrile/H<sub>2</sub>O solution. The resulting mixture was sparged with nitrogen for 10 min, placed in a photoreactor, and irradiated with a blue Kessil brand A160WE Tuna Blue LED 40 W lamp cooled with an airstream. After the set duration (see Table S2 below), the reaction mixture was partitioned with DCM (5 ml) and the phases were separated. The aqueous phase was extracted with DCM (4 X 5 ml) and the combined organic layers dried over Na<sub>2</sub>SO<sub>4</sub> and concentrated under nitrogen. (C<sub>6</sub>H<sub>5</sub>)<sub>3</sub>CH (0.1 mmol, 24.4 mg) was added as NMR standard to the crude reaction product and the yield and conversion determined via <sup>1</sup>H-NMR (pg. S71).

**Table S2.** Optimization of reaction time for photochemical method.

| entry | catalyst  | time [min] | yield [%] <sup>#</sup> | conv. [%] <sup>#</sup> |
|-------|-----------|------------|------------------------|------------------------|
| 1     | <b>S9</b> | 60         | 34 (17)                | 69                     |
| 2     | <b>S9</b> | 120        | 11 (51)                | >99                    |
| 3     | <b>2a</b> | 60         | 70 (4)                 | 79                     |

|   |           |     |         |     |
|---|-----------|-----|---------|-----|
| 4 | <b>2a</b> | 120 | 83 (13) | 99  |
| 5 | <b>2a</b> | 220 | 59 (33) | >99 |

# Yield and conversion by <sup>1</sup>H integration using Ph<sub>3</sub>CH as internal standard. Yield of carboxylic acid shown in parentheses.

### Photochemical Method – Optimization of Catalyst Loading

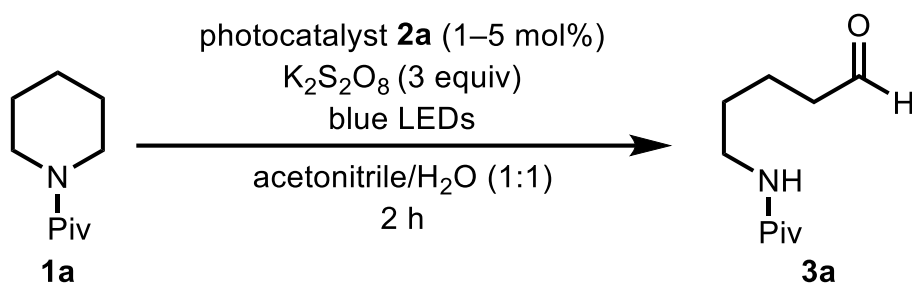

To a 2-dram vial was added, sequentially, piperidine **1a** (50.7 mg, 0.30 mmol, 1 equiv), potassium persulfate (243 mg, 0.60 mmol, 3 equiv), photocatalyst **2a** (1, 2.5, or 5 mol%) and 15 ml of a 1:1 acetonitrile:H<sub>2</sub>O solution. The resulting mixture was sparged with nitrogen for 10 min and placed in a photoreactor, irradiated with a blue Kessil brand A160WE Tuna Blue LED 40 W lamp and cooled with an airstream. After 2 h, the reaction mixture was partitioned with DCM (5 ml) and the phases were separated. The aqueous phase was extracted with DCM (4 X 5 ml) and the combined organic layers dried over Na<sub>2</sub>SO<sub>4</sub> and concentrated under nitrogen. (C<sub>6</sub>H<sub>5</sub>)<sub>3</sub>CH (0.1 mmol, 24.4 mg) was added as NMR standard to the crude reaction product and the yield as well as conversion determined by <sup>1</sup>H-NMR (pg. S72).

**Table S3.** Optimization of catalyst loading for RTA (A).

| entry | cat. loading | yield [%] <sup>#</sup> | conv. [%] <sup>#</sup> |
|-------|--------------|------------------------|------------------------|
|       | [mol%]       |                        |                        |
| 1     | 1            | 37 (9)                 | 97                     |
| 2     | 2.5          | 63 (24)                | 96                     |
| 3     | 5            | 83 (13)                | 99                     |

# Yield and conversion by <sup>1</sup>H integration using Ph<sub>3</sub>CH as internal standard. Yield of carboxylic acid shown in parentheses.

### Photochemical Method – Optimization of Oxidant and Solvent

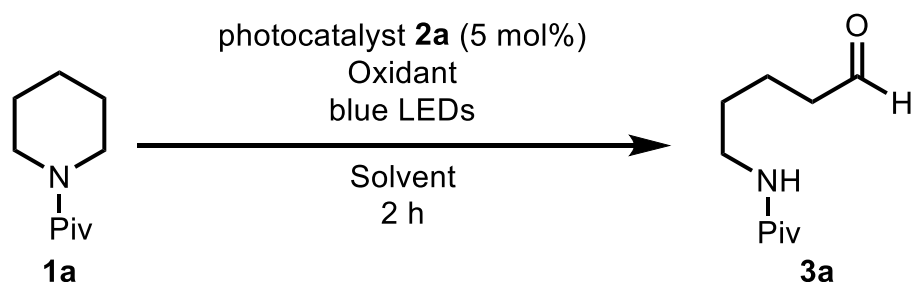

To a 2-dram vial was added, sequentially, piperidine **1a** (50.7 mg, 0.30 mmol, 1 equiv), oxidant (0.60 mmol, 3 equiv; or 1.20 mmol, 6 equiv), photocatalyst **2a** (5 mol%) and 15 ml of a 1:1 solvent solution. The resulting mixture was sparged with nitrogen for 10 min and placed in a photoreactor, exposed to a blue Kessil brand A160WE Tuna Blue LED 40 W lamp and cooled with an airstream. After 2 h, the reaction mixture was partitioned with DCM (5 ml) and the phases were separated. The aqueous phase was extracted with DCM (4 X 5 ml) and the combined organic layers dried over Na<sub>2</sub>SO<sub>4</sub> and concentrated under nitrogen. (C<sub>6</sub>H<sub>5</sub>)<sub>3</sub>CH (0.1 mmol, 24.4 mg) was added as NMR standard to the crude reaction product and the yield and conversion determined using <sup>1</sup>H-NMR (pg. S72–S73).

**Table S4.** Optimization of oxidant for photochemical method.

| entry | oxidant                                                       | equiv. | yield [%] <sup>#</sup> | conv. [%] <sup>#</sup> |
|-------|---------------------------------------------------------------|--------|------------------------|------------------------|
| 1     | K <sub>2</sub> S <sub>2</sub> O <sub>8</sub>                  | 3      | 83 (13)                | 99                     |
| 2     | (NH <sub>4</sub> ) <sub>2</sub> S <sub>2</sub> O <sub>8</sub> | 3      | 18 (1)                 | 98                     |
| 3     | Na <sub>2</sub> S <sub>2</sub> O <sub>8</sub>                 | 3      | 70 (24)                | >99                    |
| 4     | Oxone                                                         | 3      | 47 (31)                | 87                     |
| 5     | H <sub>2</sub> O <sub>2</sub> (30%)                           | 3      | 0                      | 35                     |
| 6     | TBHP                                                          | 3      | 0                      | 20                     |

<sup>#</sup> Yield and conversion by <sup>1</sup>H integration using Ph<sub>3</sub>CH as internal standard. Yield of carboxylic acid shown in parentheses.

**Table S5.** Optimization of solvent for photochemical method.

| entry | solvent                        | M [mol/L] | yield [%] <sup>#</sup> | conv. [%] <sup>#</sup> |
|-------|--------------------------------|-----------|------------------------|------------------------|
| 1     | MeCN/H <sub>2</sub> O (1:1)    | 0.02      | 83 (13)                | 99                     |
| 2     | Acetone/H <sub>2</sub> O (1:1) | 0.02      | 67 (18)                | 96                     |
| 3     | DCE/H <sub>2</sub> O (1:1)     | 0.02      | 3 (0)                  | 44                     |

<sup>#</sup> Yield and conversion by <sup>1</sup>H integration using Ph<sub>3</sub>CH as internal standard. Yield of carboxylic acid shown in parentheses.

### Photochemical Method – Variation of Reaction Parameters

Any variation to the reaction conditions is listed as a change to the standard reaction parameters listed below.

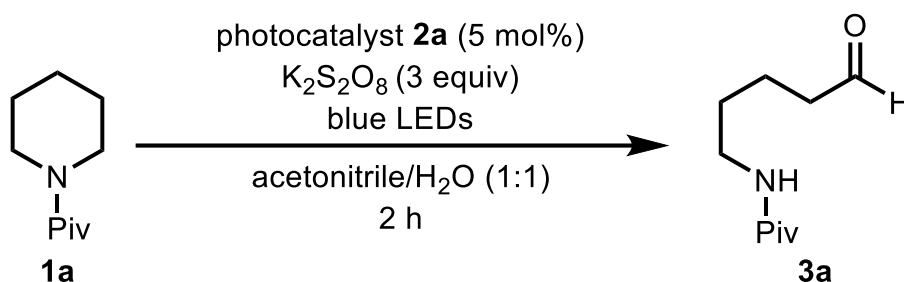

To a 2-dram vial was added, sequentially, piperidine **1a** (50.7 mg, 0.30 mmol, 1 equiv), potassium persulfate (243 mg, 0.60 mmol, 3 equiv), photocatalyst **2a** (8.1 mg, 5 mol%) and 15



ml of a 1:1 acetonitrile:H<sub>2</sub>O solution. The resulting mixture was sparged with nitrogen for 10 min and placed in a photoreactor, exposed to a blue Kessil brand A160WE Tuna Blue LED 40 W lamp and cooled with an airstream. After 2 h, the reaction mixture was partitioned with DCM (5 ml) and the phases were separated. The aqueous phase was extracted with DCM (4 X 5 ml) and the combined organic layers dried over Na<sub>2</sub>SO<sub>4</sub> and concentrated under nitrogen. (C<sub>6</sub>H<sub>5</sub>)<sub>3</sub>CH (0.1 mmol, 24.4 mg) was added as an NMR standard to the crude reaction product and the yield and conversion determined using <sup>1</sup>H NMR (pg. S74).

**Table S6.** Variation of the reaction parameters with respect to the standard conditions.

| entry | variation from the standard conditions            | yield [%]            |
|-------|---------------------------------------------------|----------------------|
| 1     | no sparging, open to air                          | 73 (19) <sup>#</sup> |
| 2     | no riboflavin tetraacetate                        | 29 (12) <sup>#</sup> |
| 3     | riboflavin ( <b>S1</b> ) (without acetate groups) | 31 (4) <sup>#</sup>  |
| 4     | no oxidant                                        | 0 <sup>#</sup>       |
| 6     | no light source                                   | 0 <sup>#</sup>       |
| 7     | 450 nm                                            | 45 (34) <sup>#</sup> |

<sup>#</sup> Yield and conversion by <sup>1</sup>H integration using Ph<sub>3</sub>CH as internal standard. Yield of carboxylic acid shown in parentheses.

### Photochemical Method – N-Protecting Group Screening

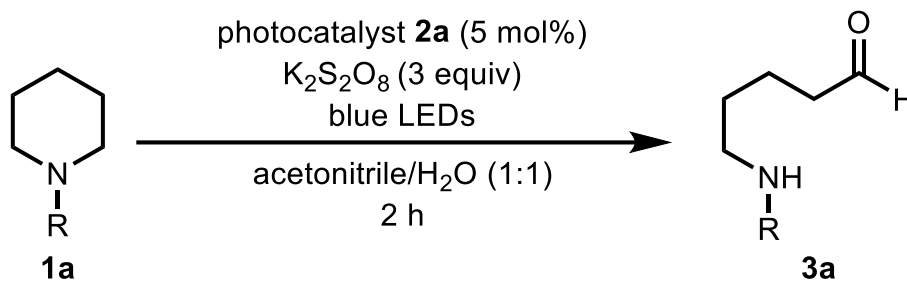

Piperidine derivatives bearing different substituents on nitrogen were subjected to the standard reaction conditions according to the representative procedure. The result obtained for N-Boc piperidine is representative of the observations made under the standard conditions.

For the quantification of the reaction outcome, (C<sub>6</sub>H<sub>5</sub>)<sub>3</sub>CH (0.1 mmol, 24.4 mg) was added as NMR standard to the crude reaction product and the yield and conversion determined using <sup>1</sup>H NMR integration (pg. S75).

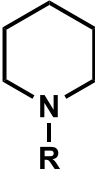

|              | <b>R</b>   | yield <sup>#</sup> | conv. <sup>#</sup> |
|--------------|------------|--------------------|--------------------|
| <b>1a:</b>   | <b>Piv</b> | 96%                | 99%                |
| <b>1a.a:</b> | <b>Boc</b> | 18%                | 86%                |
| <b>1a.b:</b> | <b>Bz</b>  | 41%                | 54%                |

<sup>#</sup> Yield by <sup>1</sup>H integration using Ph<sub>3</sub>CH as internal standard.

**Figure S3.** Results for N-protecting group screening.

## 2.5 Experiments to Probe Triplet Energy Transfer Mechanism

Some recent reports<sup>7</sup> of photochemical transformations have implicated excited-state triplet energy transfer from the photocatalyst to the substrate or oxidant as a key process in the reaction mechanism. In order to determine the viability of such a reaction pathway in our photoinitiated riboflavin tetraacetate oxidation method, photocatalysts of varying triplet energies were explored in place of riboflavin tetraacetate (**2a**), and the conversion of substrate **1a** was assessed for a correlation between the photocatalyst triplet energy and substrate conversion (see Table S7 below). The excited state triplet energy of the photocatalyst does not appear to have an effect on substrate conversion, so it is unlikely that triplet energy transfer is an operable pathway for oxidation.

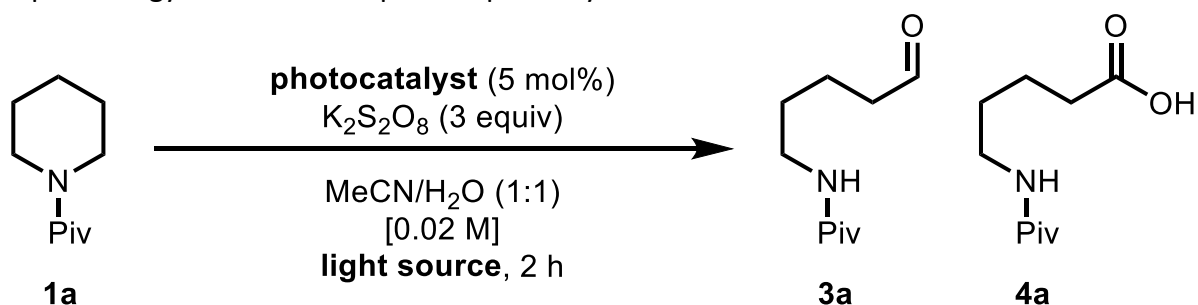

**Table S7.** Results of triplet energy transfer mechanistic experiments.

| catalyst                                                          | $\lambda$<br>[nm] | triplet<br>energy<br>[kcal/mol] | conv.<br>[%] <sup>#</sup> | 3a<br>yield<br>[%] <sup>#</sup> | 4a<br>yield<br>[%] <sup>#</sup> |
|-------------------------------------------------------------------|-------------------|---------------------------------|---------------------------|---------------------------------|---------------------------------|
| (Ir[dF(CF <sub>3</sub> )ppy] <sub>2</sub> (dtbpy))PF <sub>6</sub> | 400               | 61                              | 61                        | 22                              | 0                               |
|                                                                   | 450               |                                 | 63                        | 21                              | 0                               |
| 9-fluorenone                                                      | 400               | 53                              | 34                        | 2                               | 0                               |
|                                                                   | 450               |                                 | 51                        | 0                               | 0                               |
| Ru(bpy) <sub>3</sub> Cl · H <sub>2</sub> O                        | 400               | 47                              | 99                        | 0                               | 46                              |
|                                                                   | 450               |                                 | 98                        | 0                               | 54                              |

<sup>#</sup> Yield and conversion by <sup>1</sup>H integration using Ph<sub>3</sub>CH as internal standard.

## 2.6 Kinetics Experiments

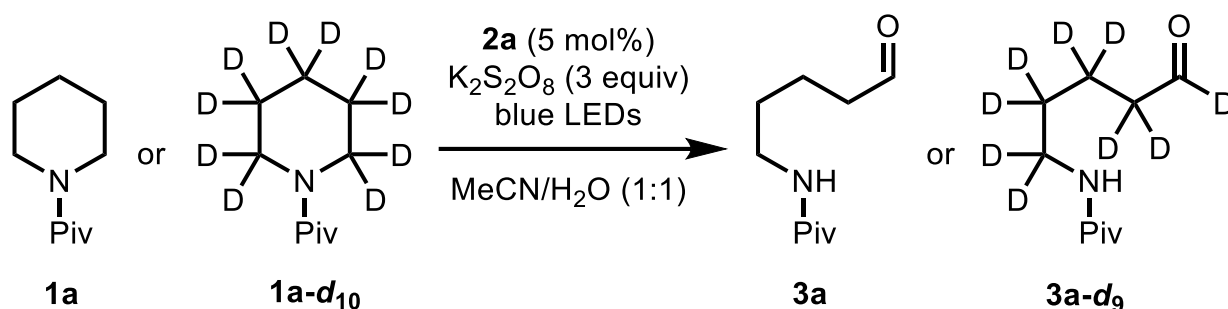

### Kinetic Isotope Effect

**Absolute rates:** **1a** (169 mg, 1.00 mmol, 1 equiv) or **1a-d<sub>10</sub>** (179 mg, 1.00 mmol, 1 equiv), potassium persulfate (811 mg, 3.00 mmol, 3 equiv), and **2a** (27.2 mg, 50.0  $\mu$ mol, 0.05 equiv) were combined in a 30 mL vial with a magnetic stir bar, dissolved in 20 mL of 1:1 MeCN/H<sub>2</sub>O, and the mixture was sparged with N<sub>2</sub>. The mixture was allowed to stir under irradiation from a Kessil brand A160WE Tuna Blue LED 40 W lamp. Every 5 minutes, the lamp was quickly turned off, a 0.25 mL aliquot was taken from the mixture, the reaction vessel was placed back into the photobox, and irradiation was resumed. The aliquot was diluted with DI H<sub>2</sub>O and extracted with 3 x 1 mL DCM. The combined organic layers were dried over Na<sub>2</sub>SO<sub>4</sub>, filtered, and concentrated. The resulting crude samples were analyzed by <sup>1</sup>H NMR using Ph<sub>3</sub>CH as a standard to assess yield of **3a** or **3a-d<sub>9</sub>**.  $k_H/k_D = 1.1$  (average of three trials).

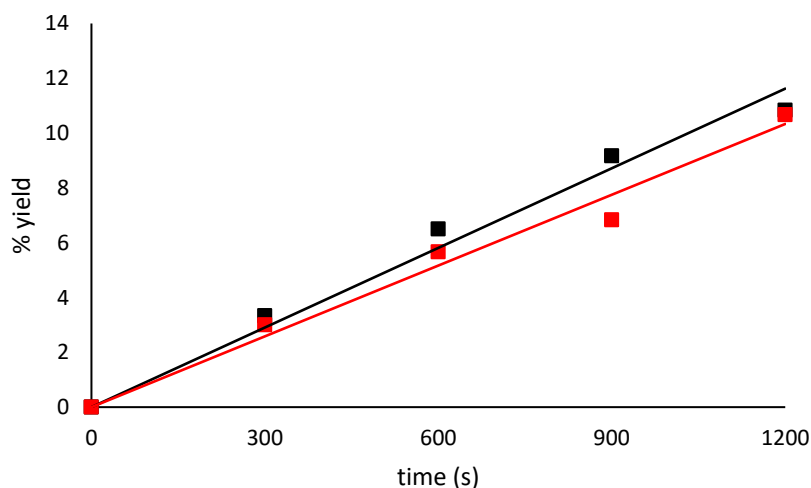

**Figure S4.** Initial rates for **1a** (black,  $9.6 \times 10^{-3}$  M/s) and **1a-d<sub>10</sub>** (red,  $8.2 \times 10^{-3}$  M/s),  $k_H/k_D = 1.1$ .

**Intermolecular competition:** **1a** (8.5 mg, 50.0  $\mu$ mol, 1 equiv) and **1a-d<sub>10</sub>** (8.9 mg, 50.0  $\mu$ mol, 1 equiv), potassium persulfate (81.1 mg, 0.300 mmol, 6 equiv), and **2a** (2.7 mg, 5.0  $\mu$ mol, 0.1 equiv) were combined in a 2 dram vial with a magnetic stir bar, dissolved in 5 mL of 1:1 MeCN/H<sub>2</sub>O, and the mixture was sparged with N<sub>2</sub>. The mixture was allowed to stir under irradiation from a Kessil brand A160WE Tuna Blue LED 40 W lamp for 15 minutes. The mixture was extracted with 3 x 3 mL DCM. The combined organic layers were dried over Na<sub>2</sub>SO<sub>4</sub>, filtered, and concentrated. The aldehyde products were isolated by preparative thin-layer

chromatography (1:1 hexanes/EtOAc). The resulting mixture of **3a** and **3a-d<sub>9</sub>** was analyzed by <sup>1</sup>H NMR using Ph<sub>3</sub>CH as a standard to assess yields. [P<sub>H</sub>]/[P<sub>D</sub>] = 1.0 (average of three trials)

#### Light On/Off Experiment

**1a** (169 mg, 1.00 mmol, 1 equiv), potassium persulfate (811 mg, 3.00 mmol, 3 equiv), and **2a** (27.2 mg, 50.0 μmol, 0.05 equiv) were combined in 30 mL vial with a magnetic stir bar, dissolved in 20 mL of 1:1 MeCN/H<sub>2</sub>O, and the mixture was sparged with N<sub>2</sub>. The reaction mixture was irradiated with a Kessil brand A160WE Tuna Blue LED 40 W lamp and kept in the dark for alternating 20 min periods. At the start/end of each period, a 0.25 mL aliquot was taken from the mixture. The aliquot was diluted with DI H<sub>2</sub>O and extracted with 3 x 1 mL DCM. The combined organic layers were dried over Na<sub>2</sub>SO<sub>4</sub>, filtered, and concentrated. The resulting crude samples were analyzed by <sup>1</sup>H NMR using Ph<sub>3</sub>CH as a standard to assess yield of **3a**.

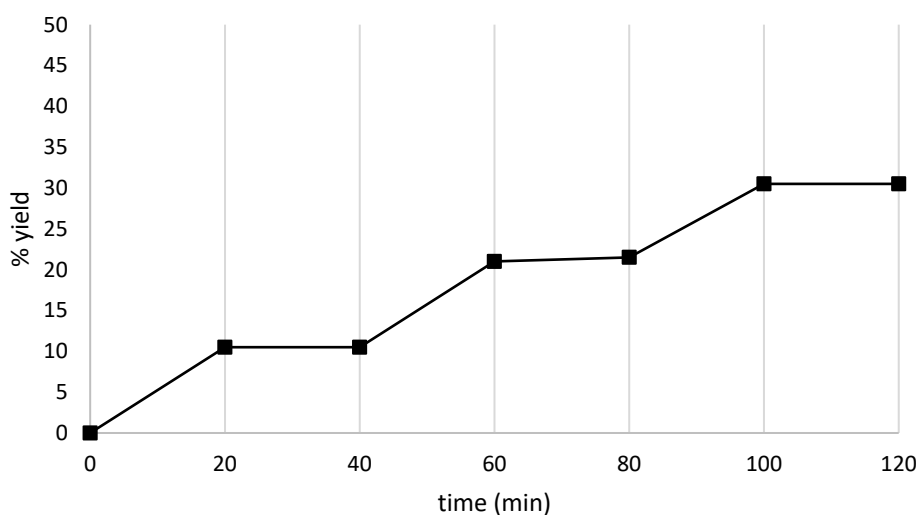

Figure S5. Light on/off experiment.

## 2.7 Procedure for Riboflavin Tetraacetate-mediated Ring Opening

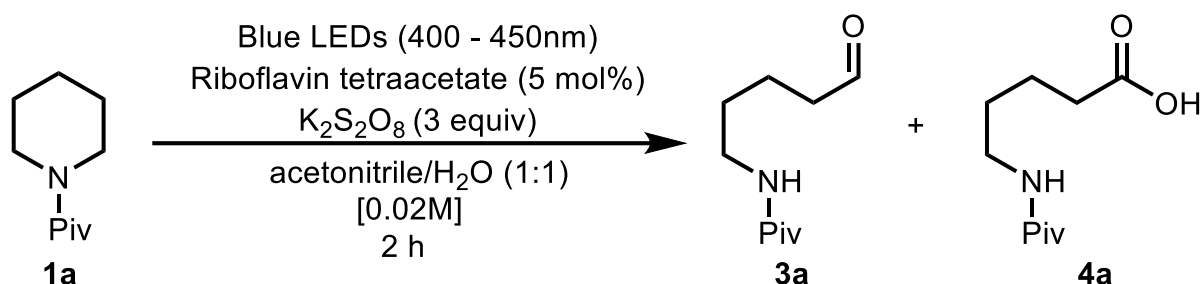

To a 2-dram vial was added, sequentially, piperidine **1a** (50.7 mg, 0.30 mmol, 1 equiv), potassium persulfate (243 mg, 0.60 mmol, 3 equiv), photocatalyst riboflavin tetraacetate (8.1 mg, 5 mol%) and 15 ml of a 1:1 acetonitrile:H<sub>2</sub>O solution. The resulting mixture was sparged with nitrogen for 10 min and placed in a photoreactor, exposed to a blue Kessil brand A160WE Tuna Blue LED 40 W lamp and cooled with an airstream. After 2 h, the reaction mixture was partitioned with DCM (5 ml) and the phases were separated. The aqueous phase was extracted with DCM (4 X 5 ml) and the combined organic layers dried over Na<sub>2</sub>SO<sub>4</sub> and concentrated under nitrogen to afford a mixture of *N*-(5-oxopentyl)pivalamide (**3a**) and 5-pivalamidopentanoic acid (**4a**). The mixture was subjected to an acid-base extraction using sodium bicarbonate (sat. solution) and HCl (5N) to give the major aldehyde product (**3a**) (47.6 mg, 86%) as a dark yellow brownish oil and the minor acid product (**4a**) (1.9 mg, 3%) as a yellowish oil.

### Aldehyde (**3a**):

<sup>1</sup>H NMR (500 MHz, CDCl<sub>3</sub>): δ 9.73 (t, *J* = 1.5 Hz, 1H), 5.83 (s, 1H), 3.20 (td, *J* = 7.0, 5.8 Hz, 2H), 2.46 (td, *J* = 7.0, 1.4 Hz, 2H), 1.65 – 1.55 (m, 2H), 1.54 – 1.45 (m, 2H), 1.15 (s, 9H);

<sup>13</sup>C NMR (126 MHz, CDCl<sub>3</sub>): δ 202.4, 178.6, 43.4, 39.0, 38.7, 29.1, 27.7, 19.1;

HRMS (ESI): Calc'd for C<sub>10</sub>H<sub>20</sub>NO<sub>2</sub> [M+H]<sup>+</sup>: 186.1489, found: 186.1488.

### Acid (**4a**):

<sup>1</sup>H NMR (500 MHz, CDCl<sub>3</sub>): δ 5.76 (s, 1H), 3.26 (qd, *J* = 7.1, 5.8 Hz, 2H), 2.40 (t, *J* = 7.1 Hz, 2H), 1.70 – 1.49 (m, 4H), 1.20 (d, *J* = 1.8 Hz, 9H);

<sup>13</sup>C NMR (126 MHz, CDCl<sub>3</sub>): δ 178.9, 177.0, 39.0, 38.8, 33.2, 29.1, 27.7, 21.9.

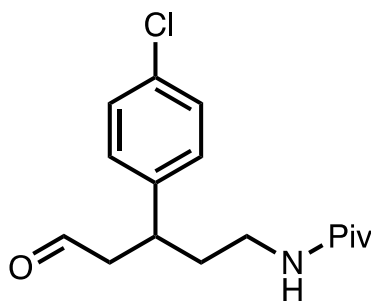

**3b**

***N*-(3-(4-chlorophenyl)-5-oxopentyl)pivalamide (**3b**):** The title compound was prepared according to the representative procedure using 1-(4-(4-chlorophenyl)piperidin-1-yl)-2,2-dimethylpropan-1-one to give **3b** (9.1 mg, 62%) as a colorless oil.

**<sup>1</sup>H NMR** (500 MHz, CDCl<sub>3</sub>): δ 9.67 (t, *J* = 1.5 Hz, 1H), 7.31 – 7.24 (m, 2H), 7.17 – 7.11 (m, 2H), 5.63 (s, 1H), 3.26 – 3.13 (m, 2H), 3.05 (ddt, *J* = 11.6, 7.5, 5.9 Hz, 1H), 2.84 – 2.69 (m, 2H), 1.92 – 1.73 (m, 2H), 1.14 (s, 9H);

**<sup>13</sup>C NMR** (101 MHz, CDCl<sub>3</sub>): δ 200.9, 178.6, 141.8, 132.8, 129.2, 128.9, 50.6, 38.7, 37.9, 37.1, 36.2, 27.6;

**HRMS** (ESI): Calc'd for C<sub>16</sub>H<sub>23</sub>NO<sub>2</sub>Cl [M+H]<sup>+</sup>: 296.1412, found: 296.1411.

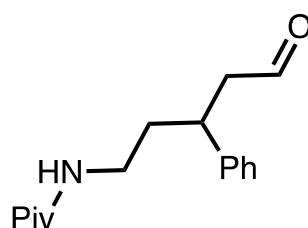

**3c**

***N*-(5-Oxo-3-phenylpentyl)pivalamide (3c)**: The title compound was prepared according to the representative procedure using 2,2-dimethyl-1-(4-phenylpiperidin-1-yl)propan-1-one. Purification by preparative thin-layer chromatography (50% EtOAc/hexanes) provided (**3c**) (11.24 mg, 43%, 75% BRSM) as a colorless oil.

**<sup>1</sup>H NMR** (600 MHz, CDCl<sub>3</sub>) δ 9.68 (t, *J* = 1.7 Hz, 1H), 7.34 – 7.28 (m, 2H), 7.24 – 7.18 (m, 3H), 5.58 (s, 1H), 3.28 – 3.19 (m, 2H), 3.11 – 3.01 (m, 1H), 1.99 – 1.86 (m, 2H), 1.86 – 1.74 (m, 2H), 1.11 (s, 9H);

**<sup>13</sup>C NMR** (151 MHz, CDCl<sub>3</sub>) δ 201.4, 178.6, 143.3, 129.1, 127.5, 50.7, 38.7, 38.0, 36.2, 28.5, 27.6;

**HRMS** (ESI): Calc'd for C<sub>16</sub>H<sub>24</sub>NO<sub>2</sub> [M+H]<sup>+</sup>: 262.1802, found: 262.1802.

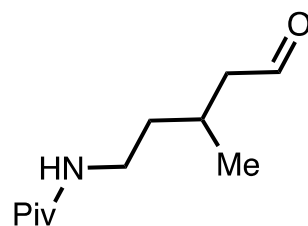

**3d**

***N*-(3-Methyl-5-oxopentyl)pivalamide (3e)**: The title compound was prepared according to the representative procedure using 2,2-dimethyl-1-(4-methylpiperidin-1-yl)propan-1-one. Purification by preparative thin-layer chromatography (50% EtOAc/hexanes) provided (**3d**) (15.1 mg, 76%) as a colorless oil.

**<sup>1</sup>H NMR** (400 MHz, CDCl<sub>3</sub>): δ 9.75 (t, *J* = 1.7 Hz, 1H), 5.83 (s, 1H), 3.34 – 3.13 (m, 2H), 2.56 – 2.24 (m, 2H), 2.10 (dq, *J* = 13.5, 6.7 Hz, 1H), 1.55 – 1.38 (m, 2H), 1.19 (s, 9H), 0.99 (d, *J* = 6.8 Hz, 3H);

**<sup>13</sup>C NMR** (101 MHz, CDCl<sub>3</sub>): δ 202.6, 178.7, 51.1, 38.8, 37.5, 36.6, 27.7, 25.5, 20.2;

**HRMS** (ESI): Calc'd for C<sub>11</sub>H<sub>21</sub>NO<sub>2</sub>Na [M+Na]<sup>+</sup>: 222.1465, found: 222.1466.

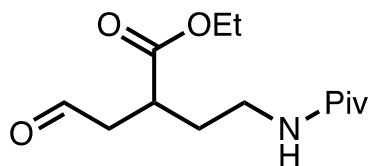

**3e**

**Ethyl 4-oxo-2-(2-pivalamidoethyl)butanoate (3e)**: The title compound was prepared according to the representative procedure using ethyl 1-pivaloylpiperidine-4-carboxylate. Purification by preparative thin-layer chromatography (50% EtOAc/hexanes) provided (**3e**) (34.7 mg, 45%) as a colorless oil.

**<sup>1</sup>H NMR** (500 MHz, CDCl<sub>3</sub>): δ 9.74 (d, *J* = 1.0 Hz, 1H), 6.03 – 5.97 (m, 1H), 4.14 (q, *J* = 7.1 Hz, 2H), 3.37 – 3.15 (m, 2H), 2.96 – 2.84 (m, 2H), 2.70 – 2.60 (m, 1H), 1.90 – 1.66 (m, 2H), 1.24 (t, *J* = 7.1 Hz, 3H), 1.17 (s, 9H);

**<sup>13</sup>C NMR** (126 MHz, CDCl<sub>3</sub>): δ 200.0, 178.8, 174.5, 61.2, 45.4, 38.8, 37.3, 36.7, 31.4, 31.3, 27.6, 14.3;

**HRMS** (ESI): Calc'd for C<sub>13</sub>H<sub>24</sub>NO<sub>4</sub> [M+H]<sup>+</sup>: 258.1700, found: 257.1699.

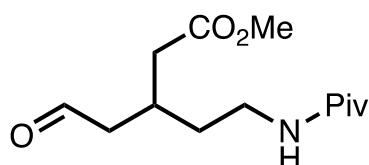

**3f**

**Methyl 5-oxo-3-(2-pivalamidoethyl)pentanoate (3f)**: The title compound was prepared according to the representative procedure using methyl 2-(1-pivaloylpiperidin-4-yl)acetate. However, the catalyst loading was increased to 10 mol%. Purification by preparative thin-layer chromatography (70% EtOAc/hexanes) provided (**3f**) (9.62 mg, 75%) as a colorless oil.

**<sup>1</sup>H NMR** (500 MHz, CDCl<sub>3</sub>): δ 9.76 (d, *J* = 1.3 Hz, 1H), 6.04 (s, 1H), 3.67 (s, 3H), 3.25 (tdd, *J* = 6.8, 5.5, 1.6 Hz, 2H), 2.57 (dd, *J* = 6.3, 1.3 Hz, 2H), 2.52 – 2.43 (m, 1H), 2.42 – 2.31 (m, 2H), 1.55 (m, 2H), 1.20 (s, 9H);

**<sup>13</sup>C NMR** (126 MHz, CDCl<sub>3</sub>): δ 201.4, 178.8, 172.9, 51.7, 48.2, 38.2, 36.9, 34.0, 28.3, 27.6, 26.7;

**HRMS** (ESI): Calc'd for C<sub>13</sub>H<sub>23</sub>NO<sub>4</sub>Na [M+Na]<sup>+</sup>: 280.1519, found: 280.1519.

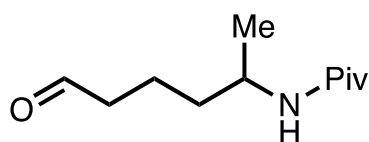

**3g**



***N*-(6-oxohexan-2-yl)pivalamide (3g)**: The title compound was prepared according to the representative procedure on a 300  $\mu\text{mol}$  scale using 2,2-dimethyl-1-(2-methylpiperidin-1-yl)propan-1-one. Purification by preparative thin-layer chromatography (50% EtOAc/hexanes) provided (**3g**) (43.3 mg, 72%) as a colorless oil.

$^1\text{H NMR}$  (500 MHz,  $\text{CDCl}_3$ ):  $\delta$  9.76 (t,  $J = 1.4$  Hz, 1H), 5.41 (s, 1H), 4.04 – 3.92 (m, 1H), 2.56 – 2.40 (m, 2H), 1.62 – 1.38 (m, 4H), 1.19 (d,  $J = 3.6$  Hz, 9H), 1.12 (d,  $J = 6.6$  Hz, 3H);

$^{13}\text{C NMR}$  (126 MHz,  $\text{CDCl}_3$ ):  $\delta$  202.42, 178.1, 44.7, 43.6, 38.8, 36.4, 27.7, 21.1, 18.5;

**HRMS** (ESI): Calc'd for  $\text{C}_{11}\text{H}_{22}\text{NO}_2$  [ $\text{M}+\text{H}$ ] $^+$ : 200.1645, found: 200.1646.

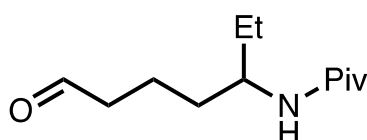

**3h**

***N*-(7-oxoheptan-3-yl)pivalamide (3h)**: The title compound was prepared according to the representative procedure on a 300  $\mu\text{mol}$  scale using 1-(2-ethylpiperidin-1-yl)-2,2-dimethylpropan-1-one. Purification by preparative thin-layer chromatography (50% EtOAc/hexanes) provided (**3h**) (33.4 mg, 52%) as a colorless oil.

$^1\text{H NMR}$  (500 MHz,  $\text{CDCl}_3$ )  $\delta$  9.72 (t,  $J = 1.5$  Hz, 1H), 5.35 (d,  $J = 9.0$  Hz, 1H), 3.82 (dtd,  $J = 12.3, 8.7, 4.5$  Hz, 1H), 2.54 – 2.34 (m, 2H), 1.68 – 1.41 (m, 4H), 1.34 (m, 2H), 1.17 (s, 9H), 0.85 (t,  $J = 7.5$  Hz, 3H);

$^{13}\text{C NMR}$  (126 MHz,  $\text{CDCl}_3$ )  $\delta$  202.4, 178.3, 49.9, 43.6, 34.3, 28.2, 27.8, 18.4, 10.3;

**HRMS** (ESI): Calc'd for  $\text{C}_{12}\text{H}_{24}\text{NO}_2$  [ $\text{M}+\text{H}$ ] $^+$ : 214.1802, found: 214.1800.

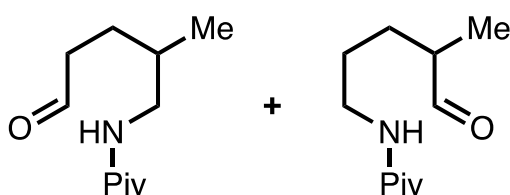

**3i.a**

**3i.b**

***N*-(2-methyl-5-oxopentyl)pivalamide (3i.a) and *N*-(4-methyl-5-oxopentyl)pivalamide (3i.b)**: The title compound was prepared according to the representative procedure using 2,2-dimethyl-1-(3-methylpiperidin-1-yl)propan-1-one. Purification by preparative thin-layer chromatography (50% EtOAc/hexanes) provided a mixture of **3i.a** and **3i.b** (14.4 mg, 72%; ratio **3i.a**:**3i.b** 1:0.78) as a colorless oil.

$^1\text{H NMR}$  (400 MHz,  $\text{CDCl}_3$ ):  $\delta$  9.76 (t,  $J = 1.3$  Hz, 1H), 9.59 (d,  $J = 1.7$  Hz, 1H), 5.89 (s, 1H), 5.78 (s, 1H), 3.29 – 3.00 (m, 4H), 2.60 – 2.42 (m, 2H), 2.36 (hd,  $J = 7.0, 1.7$  Hz, 1H), 1.77 – 1.28 (m, 6H), 1.18 (d,  $J = 6.0$  Hz, 18H), 1.09 (d,  $J = 7.1$  Hz, 2H), 0.88 (d,  $J = 6.5$  Hz, 3H);

$^{13}\text{C NMR}$  (126 MHz,  $\text{CDCl}_3$ ):  $\delta$  204.9, 202.5, 178.7, 178.6, 46.0, 44.7, 41.5, 39.4, 38.9, 38.8, 33.1, 27.7, 27.7, 27.5, 27.2, 25.9, 17.6, 13.5;

**HRMS** (ESI): Calc'd for  $\text{C}_{11}\text{H}_{22}\text{NO}_2$  [ $\text{M}+\text{H}$ ] $^+$ : 200.1645, found: 200.1644.

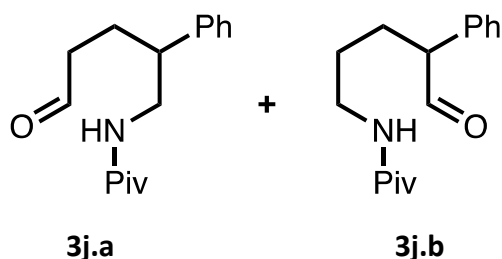

***N*-(5-Oxo-2-phenylpentyl)pivalamide (3j.a)** and ***N*-(5-Oxo-4-phenylpentyl)pivalamide (3j.b)**: The title compounds were prepared according to the representative procedure using 2,2-dimethyl-1-(3-phenylpiperidin-1-yl)propan-1-one. Purification by preparative thin-layer chromatography (50% EtOAc/hexanes) provided a mixture of **3j.a** and **3j.b** (52.40 mg, 67%; ratio **3j.a**:**3j.b** 1:0.5) as colorless oils.

**<sup>1</sup>H NMR** (500 MHz, CDCl<sub>3</sub>): δ 9.67 (t, *J* = 1.3 Hz, 1H), 9.66 (d, *J* = 1.6 Hz, 1H), 7.39 – 7.22 (m, 7H), 7.18 – 7.11 (m, 4H), 5.73 (s, 1H), 5.54 (s, 1H), 3.73 – 3.60 (m, 2H), 3.54 (ddd, *J* = 8.1, 6.4, 1.6 Hz, 1H), 3.28 – 3.16 (m, 3H), 2.86 – 2.76 (m, 2H), 2.44 – 2.27 (m, 3H), 2.14 – 1.98 (m, 3H), 1.91 – 1.79 (m, 2H), 1.76 – 1.66 (m, 1H), 1.53 – 1.39 (m, 1H), 1.17 (s, 6H), 1.06 (s, 14H);  
**<sup>13</sup>C NMR** (126 MHz, CDCl<sub>3</sub>): δ 201.9, 200.6, 178.6, 178.5, 141.6, 136.1, 129.3, 129.0, 128.9, 127.9, 127.8, 127.3, 58.7, 45.1, 44.9, 41.8, 39.1, 38.7, 38.7, 27.7, 27.5, 27.3, 26.8, 25.5;  
**HRMS** (ESI): Calc'd for C<sub>16</sub>H<sub>24</sub>NO<sub>2</sub> [M+H]<sup>+</sup>: 262.1802, found: 262.1801.

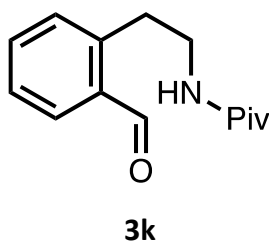

***N*-(2-Formylphenethyl)pivalamide (3k)**: The title compound was prepared according to the representative procedure using 1-(3,4-dihydroisoquinolin-2(1*H*)-yl)-2,2-dimethylpropan-1-one. Purification by preparative thin-layer chromatography (50% EtOAc/hexanes) provided the title compound (**3k**) (12.13 mg, 52%) as a yellow-brownish oil.

**<sup>1</sup>H NMR** (500 MHz, CDCl<sub>3</sub>) δ 10.17 (s, 1H), 7.80 (dd, *J* = 7.6, 1.6 Hz, 1H), 7.53 (td, *J* = 7.5, 1.5 Hz, 1H), 7.43 (td, *J* = 7.5, 1.2 Hz, 1H), 7.31 (dd, *J* = 7.7, 1.2 Hz, 1H), 5.99 (s, 1H), 3.51 (td, *J* = 6.9, 5.6 Hz, 2H), 3.25 (t, *J* = 6.9 Hz, 2H), 1.12 (s, 9H).  
**<sup>13</sup>C NMR** (126 MHz, CDCl<sub>3</sub>) δ 193.8, 178.8, 141.7, 134.4, 134.1, 134.0, 132.1, 127.3, 41.2, 38.8, 32.4, 27.7;  
**HRMS** (ESI): Calc'd for C<sub>14</sub>H<sub>20</sub>NO<sub>2</sub> [M+H]<sup>+</sup>: 234.1489, found: 234.1489.

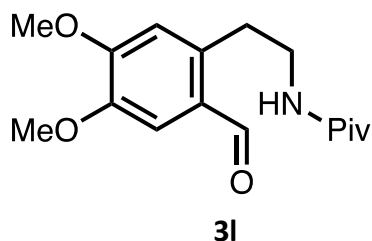

***N*-(2-Formyl-4,5-dimethoxyphenethyl)pivalamide (3I)**: The title compound was prepared according to the representative procedure using 1-(6,7-dimethoxy-3,4-dihydroisoquinolin-2(1*H*)-yl)-2,2-dimethylpropan-1-one. Purification by preparative thin-layer chromatography (50% EtOAc/hexanes) provided the title compound (**3I**) (27.9 mg, 95%) as a yellow-brownish oil.

<sup>1</sup>H NMR (500 MHz, CDCl<sub>3</sub>) δ 10.08 (s, 1H), 7.30 (s, 1H), 6.75 (s, 1H), 5.98 (t, *J* = 5.9 Hz, 1H), 3.93 (d, *J* = 9.4 Hz, 6H), 3.49 (td, *J* = 7.0, 5.8 Hz, 2H), 3.19 (t, *J* = 7.0 Hz, 2H), 1.13 (s, 9H).

<sup>13</sup>C NMR (126 MHz, CDCl<sub>3</sub>) δ 191.0, 178.9, 153.9, 148.0, 137.0, 127.3, 113.8, 113.6, 56.3, 56.2, 41.7, 38.8, 31.7, 27.7;

HRMS (ESI): Calc'd for C<sub>16</sub>H<sub>24</sub>NO<sub>4</sub> [M+H]<sup>+</sup>: 294.1700, found: 294.1700.

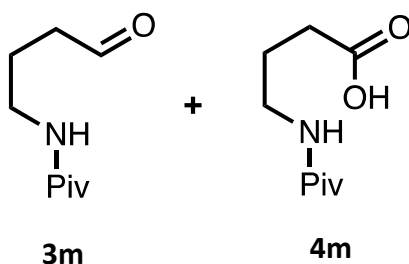

***N*-(4-oxobutyl)pivalamide (3m)** and **4-pivalamidobutanoic acid (4m)**: The title compounds were prepared according to the representative procedure using *N*-(4-oxobutyl)pivalamide--2,2-dimethyl-1-(pyrrolidin-1-yl)propan-1-one. Evaporation of the organic solvent afforded a mixture of the products (**3m**) and (**4m**). The mixture was subjected to an acid-base extraction using sodium bicarbonate (sat. solution) and HCl (5*N*) to give the major aldehyde product (**3m**) (30.9 mg, 60%) as a dark yellow brownish oil and the minor acid product (**4m**) (1.4 mg, 2.5%) as a yellowish oil.

Aldehyde (3m):

<sup>1</sup>H NMR (500 MHz, CDCl<sub>3</sub>): δ 9.77 (t, *J* = 1.2 Hz, 1H), 5.89 (s, 1H), 3.25 (td, *J* = 6.8, 5.6 Hz, 2H), 2.51 (td, *J* = 6.9, 1.2 Hz, 2H), 1.83 (p, *J* = 6.9 Hz, 2H), 1.16 (s, 9H);

<sup>13</sup>C NMR (126 MHz, CDCl<sub>3</sub>): δ 202.2, 178.8, 41.7, 39.1, 38.7, 27.6, 22.0;

HRMS (ESI): Calc'd for C<sub>9</sub>H<sub>18</sub>NO<sub>2</sub> [M+H]<sup>+</sup>: 172.1332, found: 172.1334.

Acid (4m):

<sup>1</sup>H NMR (700 MHz, CDCl<sub>3</sub>) δ 6.05 (s, 1H), 3.35 – 3.29 (m, 2H), 2.39 (t, *J* = 6.9 Hz, 2H), 1.85 (p, *J* = 6.8 Hz, 2H), 1.19 (s, 9H);

<sup>13</sup>C NMR (176 MHz, CDCl<sub>3</sub>) δ 179.6, 177.5, 81.5, 39.2, 38.9, 31.7, 27.7, 24.8;

HRMS (ESI): Calc'd for C<sub>9</sub>H<sub>18</sub>NO<sub>3</sub> [M+H]<sup>+</sup>: 188.1281, found: 188.1282.

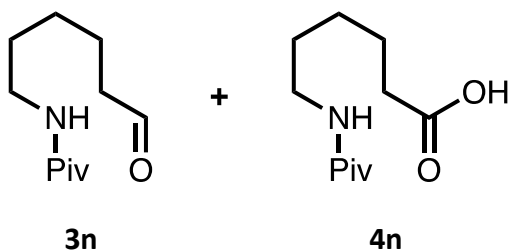

***N*-(6-oxohexyl)pivalamide (3n)** and **6-pivalamidohexanoic acid (4n)**: The title compounds were prepared according to the representative procedure using 1-(azepan-1-yl)-2,2-dimethylpropan-1-one. Evaporation of the organic solvent afforded a mixture of the products (**3n**) and (**4n**). The mixture was treated with an acid-base extraction using sodium bicarbonate (sat. solution) and HCl (5N) to give the major aldehyde product (**3n**) (16.8 mg, 84%) as a colorless oil and the minor acid product (**4n**) (2.8 mg, 13%) as a yellowish oil.

Aldehyde (3n):

<sup>1</sup>H NMR (500 MHz, CDCl<sub>3</sub>) δ 9.75 (t, *J* = 1.7 Hz, 1H), 5.68 (s, 1H), 3.23 (td, *J* = 7.2, 5.8 Hz, 2H), 2.44 (td, *J* = 7.2, 1.7 Hz, 2H), 1.64 (p, *J* = 7.3 Hz, 2H), 1.51 (ddd, *J* = 14.8, 7.8, 6.6 Hz, 2H), 1.38 – 1.30 (m, 2H), 1.18 (s, 9H);

<sup>13</sup>C NMR (101 MHz, CDCl<sub>3</sub>) δ 202.6, 178.7, 43.8, 39.3, 38.8, 29.5, 27.7, 26.4, 21.7;

HRMS (ESI): Calc'd for C<sub>11</sub>H<sub>22</sub>NO<sub>2</sub> [M+H]<sup>+</sup>: 200.1645, found: 200.1646.

Acid (4n):

<sup>1</sup>H NMR (500 MHz, CDCl<sub>3</sub>) δ 5.67 (s, 1H), 3.25 (td, *J* = 7.2, 5.8 Hz, 2H), 2.36 (t, *J* = 7.4 Hz, 2H), 1.66 (p, *J* = 7.4 Hz, 2H), 1.57 – 1.47 (m, 2H), 1.42 – 1.32 (m, 2H), 1.19 (s, 9H);

<sup>13</sup>C NMR (126 MHz, CDCl<sub>3</sub>) δ 178.7, 177.7, 39.4, 38.8, 33.7, 29.4, 27.7, 26.3, 24.4;

HRMS (ESI): Calc'd for C<sub>11</sub>H<sub>22</sub>NO<sub>3</sub> [M+H]<sup>+</sup>: 216.1594, found: 216.1595.

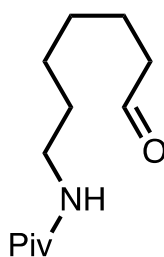

***N*-(7-oxoheptyl)pivalamide (3o)**: The title compound was prepared according to the representative procedure using 1-(azocan-1-yl)-2,2-dimethylpropan-1-one. Purification by preparative thin-layer chromatography (50% EtOAc/hexanes) provided (**3o**) (19.4 mg, 91%) as a colorless oil.

<sup>1</sup>H NMR (500 MHz, CDCl<sub>3</sub>): δ 9.75 (t, *J* = 1.7 Hz, 1H), 5.64 (s, 1H), 3.21 (td, *J* = 7.3, 5.7 Hz, 2H), 2.42 (td, *J* = 7.3, 1.8 Hz, 2H), 1.62 (p, *J* = 7.2 Hz, 2H), 1.49 (p, *J* = 7.2 Hz, 2H), 1.32 (qd, *J* = 6.8, 5.8, 3.6 Hz, 4H), 1.18 (s, 9H);

<sup>13</sup>C NMR (126 MHz, CDCl<sub>3</sub>): δ 202.8, 178.5, 43.9, 39.5, 38.8, 29.6, 28.9, 27.7, 26.7, 22.0;

HRMS (ESI): Calc'd for C<sub>12</sub>H<sub>24</sub>NO<sub>2</sub> [M+H]<sup>+</sup>: 214.1802, found: 214.1803.

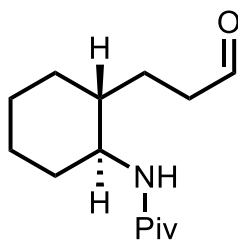

**3p**

***N*-((1*S*,2*R*)-2-(3-oxopropyl)cyclohexyl)pivalamide (**3p**):** The title compound was prepared according to the representative procedure using 2,2-dimethyl-1-((4*aR*,8*aS*)-octahydroquinolin-1(2*H*)-yl)propan-1-one. Purification by preparative thin-layer chromatography (80% EtOAc/hexanes) provided (**3p**) (15.5 mg, 65%) as a colorless oil.

**<sup>1</sup>H NMR** (500 MHz, CDCl<sub>3</sub>) δ 9.75 (d, *J* = 1.4 Hz, 1H), 5.62 (d, *J* = 8.7 Hz, 1H), 3.56 (tdd, *J* = 11.0, 8.8, 4.1 Hz, 1H), 2.60 – 2.50 (m, 1H), 2.49 – 2.39 (m, 1H), 2.04 – 1.93 (m, 1H), 1.89 – 1.83 (m, 1H), 1.83 – 1.75 (m, 1H), 1.74 – 1.64 (m, 2H), 1.38 – 1.27 (m, 3H), 1.21 (s, 9H), 1.15 – 0.95 (m, 3H);

**<sup>13</sup>C NMR** (126 MHz, CDCl<sub>3</sub>): δ 202.9, 178.1, 51.9, 42.7, 41.0, 38.9, 33.9, 31.1, 27.8, 25.8, 25.3, 24.4;

**HRMS** (ESI): Calc'd for C<sub>14</sub>H<sub>26</sub>O<sub>2</sub>N [M+H]<sup>+</sup>: 240.1958, found: 240.1958;

Calc'd for C<sub>14</sub>H<sub>26</sub>NO<sub>2</sub>Na [M+Na]<sup>+</sup>: 262.1778, found: 262.1778.

## 2.8 Procedure for Copper-Mediated Ring Opening

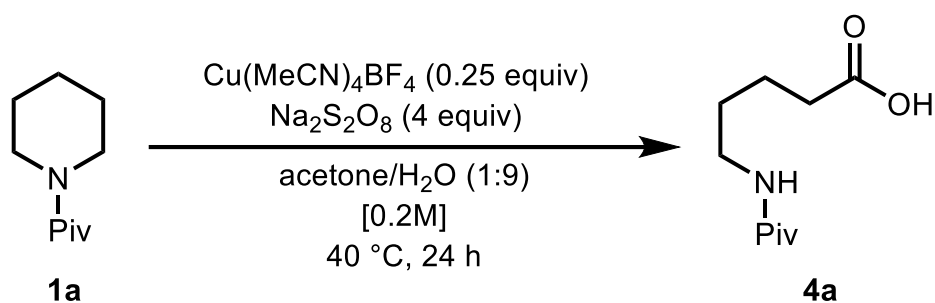

A 1-dram vial was charged with piperidine **1a** (16.9 mg, 0.10 mmol) and 0.50 mL of a 1:9 acetone: $\text{H}_2\text{O}$  solution. Sodium persulfate (95 mg, 0.40 mmol) and tetrakis(acetonitrile)copper(I) tetrafluoroborate (7.9 mg, 0.025 mmol) were added to the solution, and the resulting mixture was allowed to stir at 40 °C for 24 h. The reaction mixture was basified with sat. sodium bicarbonate to approx. pH 9, extracted with EtOAc (3 x 3 mL), subsequently acidified to ~pH 4 with 5N HCl and extracted with  $\text{CH}_2\text{Cl}_2$  (3 x 3 mL). The combined  $\text{CH}_2\text{Cl}_2$  extracts were dried over  $\text{Na}_2\text{SO}_4$ , filtered, and concentrated under reduced pressure to provide 5-pivalamidopentanoic acid **4a** (10.9 mg, 54%) as a colorless liquid.

$^1\text{H}$  NMR and  $^{13}\text{C}$  NMR spectral data were in full agreement with those for **4a** reported above. HRMS (ESI): Calc'd for  $\text{C}_{10}\text{H}_{19}\text{NO}_3$   $[\text{M}+\text{H}]^+$ : 202.1438, found: 202.1439.

NOTE: Substrates typically show full conversion after a 24 h reaction period. Some over-oxidation can be observed, leading to reduced yields of the desired carboxylic acid.

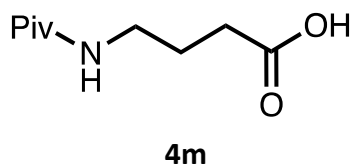

**4-Pivalamidobutanoic acid (4m)**: The title compound was prepared according to the representative procedure on a 200  $\mu\text{mol}$  scale using 2,2-dimethyl-1-(pyrrolidin-1-yl)propan-1-one. Purification by acid-base extraction provided the title compound (**4m**) (22.1 mg, 59%) as a colorless oil.

$^1\text{H}$  NMR (700 MHz,  $\text{CDCl}_3$ )  $\delta$  6.05 (broad s, 1H), 3.32 (td,  $J = 6.7, 5.8$  Hz, 2H), 2.39 (t,  $J = 6.9$  Hz, 2H), 1.85 (apparent p,  $J = 6.9$  Hz, 2H), 1.19 (s, 9H).

$^{13}\text{C}$  NMR (176 MHz,  $\text{CDCl}_3$ )  $\delta$  179.6, 177.5, 39.2, 38.8, 31.7, 27.6, 24.8.

HRMS (ESI): Calc'd for  $\text{C}_9\text{H}_{18}\text{NO}_3$   $[\text{M}+\text{H}]^+$ : 188.1281, found: 188.1282.

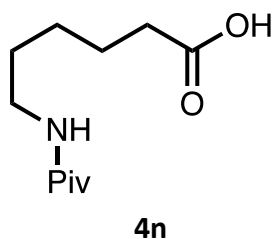

**6-Pivalamidoheptanoic acid (4n):** The title compound was prepared according to the representative procedure on a 200  $\mu\text{mol}$  scale using 1-(azepan-1-yl)-2,2-dimethylpropan-1-one. Purification via acid-base extraction provided the title compound (**4n**) (26.3 mg, 61%) as a colorless oil.

$^1\text{H NMR}$  (700 MHz,  $\text{CDCl}_3$ )  $\delta$  5.74 (broad s, 1H), 3.23 (td,  $J = 7.2, 5.7$  Hz, 2H), 2.34 (t,  $J = 7.4$  Hz, 2H), 1.64 (apparent p,  $J = 7.4$  Hz, 2H), 1.51 (apparent p,  $J = 7.6$  Hz, 2H), 1.44 – 1.33 (m, 2H), 1.18 (s, 9H).

$^{13}\text{C NMR}$  (176 MHz,  $\text{CDCl}_3$ )  $\delta$  178.9, 178.4, 39.4, 38.8, 33.9, 29.3, 27.7, 26.3, 24.4.

**HRMS** (ESI): Calc'd for  $\text{C}_{11}\text{H}_{22}\text{NO}_3$   $[\text{M}+\text{H}]^+$ : 216.1594, found: 216.1595.

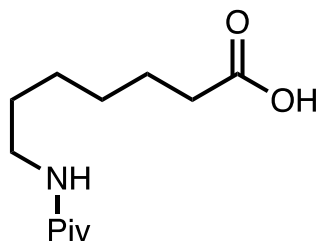

**4o**

**7-Pivalamidoheptanoic acid (4o):** The title compound was prepared according to the representative procedure on a 200  $\mu\text{mol}$  scale using 1-(azocan-1-yl)-2,2-dimethylpropan-1-one. Purification using acid-base extraction provided the title compound (**4o**) (24.3 mg, 53%) as a colorless oil.

$^1\text{H NMR}$  (500 MHz,  $\text{CDCl}_3$ )  $\delta$  5.68 (s, 1H), 3.22 (td,  $J = 7.2, 5.7$  Hz, 2H), 2.34 (t,  $J = 7.4$  Hz, 2H), 1.63 (p,  $J = 7.4$  Hz, 2H), 1.50 (p,  $J = 7.3$  Hz, 2H), 1.35 (qtd,  $J = 16.2, 5.8, 2.8$  Hz, 4H), 1.18 (s, 9H);

$^{13}\text{C NMR}$  (126 MHz,  $\text{CDCl}_3$ )  $\delta$  178.9, 178.8, 39.6, 38.8, 34.0, 29.5, 28.7, 27.7, 26.6, 24.7;

**HRMS** (ESI): Calc'd for  $\text{C}_{12}\text{H}_{24}\text{NO}_3$   $[\text{M}+\text{H}]^+$ : 230.1751, found: 230.1752.

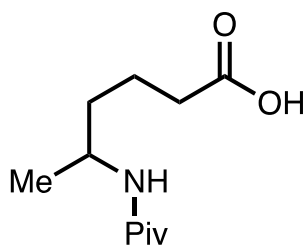

**4g**

**5-Pivalamidoheptanoic acid (4g):** The title compound was prepared according to the representative procedure on a 200  $\mu\text{mol}$  scale using 2,2-dimethyl-1-(2-methylpiperidin-1-yl)propan-1-one. Purification using acid-base extraction provided the title compound (**4g**) (26.7 mg, 62%) as a colorless oil.

$^1\text{H NMR}$  (500 MHz,  $\text{CDCl}_3$ )  $\delta$  5.52 (d,  $J = 8.3$  Hz, 1H), 3.97 (ddd,  $J = 14.2, 7.9, 6.1$  Hz, 1H), 2.43 – 2.28 (m, 2H), 1.69 – 1.54 (m, 2H), 1.54 – 1.39 (m, 2H), 1.17 (s, 9H), 1.11 (d, 3H);

$^{13}\text{C NMR}$  (126 MHz,  $\text{CDCl}_3$ )  $\delta$  178.4, 178.3, 44.9, 38.7, 38.6, 36.2, 33.7, 27.7, 21.2, 21.0;

**HRMS** (ESI): Calc'd for  $\text{C}_{11}\text{H}_{22}\text{NO}_3$   $[\text{M}+\text{H}]^+$ : 216.1594, found: 216.1595.

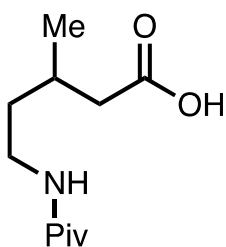

**4d**

**5-Pivalamidoheptanoic acid (4d):** The title compound was prepared according to the representative procedure using 1-(2-ethylpiperidin-1-yl)-2,2-dimethylpropan-1-one. Purification using acid-base extraction provided the title compound (**4d**) (25.0 mg, 59%) as a yellow oil.

**<sup>1</sup>H NMR** (500 MHz, CDCl<sub>3</sub>) δ 5.95 (d, *J* = 5.3 Hz, 1H), 3.27 (td, *J* = 7.0, 5.4 Hz, 2H), 2.34 (dd, *J* = 15.6, 7.2 Hz, 1H), 2.23 (dd, *J* = 15.6, 6.6 Hz, 1H), 1.99 (dq, *J* = 13.8, 7.0 Hz, 1H), 1.65 – 1.50 (m, 1H), 1.43 (dq, *J* = 14.2, 7.1 Hz, 1H), 1.17 (s, 9H), 0.99 (d, *J* = 6.9 Hz, 3H);

**<sup>13</sup>C NMR** (126 MHz, CDCl<sub>3</sub>) δ 179.2, 177.8, 41.3, 38.8, 37.6, 36.2, 27.8, 27.6, 20.1;

**HRMS** (ESI): Calc'd for C<sub>11</sub>H<sub>22</sub>NO<sub>3</sub> [M+H]<sup>+</sup>: 216.1594, found: 216.1595.

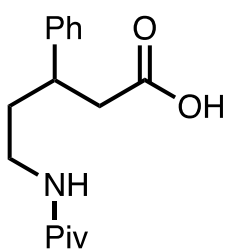

**4c**

**3-phenyl-5-pivalamidopentanoic acid (4c):** The title compound was prepared according to the representative procedure on a 200 μmol scale using 2,2-dimethyl-1-(4-phenylpiperidin-1-yl)propan-1-one and 1:1 acetone/H<sub>2</sub>O solvent. Purification using acid-base extraction provided the title compound (**4c**) (30.2 mg, 54%) as a yellowish oil.

**<sup>1</sup>H NMR** (500 MHz, CDCl<sub>3</sub>) δ 7.33 – 7.27 (m, 2H), 7.24 – 7.16 (m, 3H), 5.64 (t, *J* = 5.6 Hz, 1H), 3.27 – 3.17 (m, 1H), 3.16 – 2.98 (m, 2H), 2.73 – 2.58 (m, 2H), 2.00 – 1.88 (m, 1H), 1.85 – 1.72 (m, 1H), 1.08 (s, 9H);

**<sup>13</sup>C NMR** (126 MHz, CDCl<sub>3</sub>) δ 178.9, 176.7, 143.3, 129.0, 127.5, 127.1, 41.4, 40.1, 38.7, 38.2, 35.7, 27.5;

**HRMS** (ESI): Calc'd for C<sub>11</sub>H<sub>24</sub>NO<sub>3</sub> [M+H]<sup>+</sup>: 278.1751, found: 278.1751.

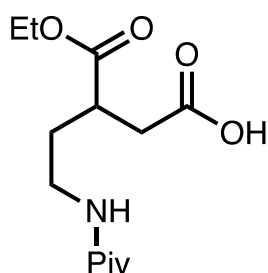

**4e**



**3-(Ethoxycarbonyl)-5-pivalamidopentanoic acid (4e):** The title compound was prepared according to the representative procedure on a 200  $\mu\text{mol}$  scale using ethyl 1-pivaloylpiperidine-4-carboxylate. Purification using acid-base extraction provided the title compound (**4e**) (24.9 mg, 46%) as a yellow-orange oil.

$^1\text{H NMR}$  (500 MHz,  $\text{CDCl}_3$ )  $\delta$  6.2 (t,  $J = 5.8$  Hz, 1H), 4.2 (q,  $J = 7.1$  Hz, 2H), 3.5 – 3.1 (m, 2H), 2.9 – 2.8 (m, 2H), 2.5 (dd,  $J = 16.5, 5.6$  Hz, 1H), 1.9 – 1.8 (m, 1H), 1.8 (dtd,  $J = 14.2, 7.1, 5.3$  Hz, 1H), 1.3 (t,  $J = 7.1$  Hz, 3H), 1.2 (s, 9H);

$^{13}\text{C NMR}$  (126 MHz,  $\text{CDCl}_3$ )  $\delta$  179.4, 175.8, 174.7, 61.2, 39.0, 38.8, 37.6, 35.8, 31.2, 27.6, 14.2; **HRMS** (ESI): Calc'd for  $\text{C}_{13}\text{H}_{24}\text{NO}_5$   $[\text{M}+\text{H}]^+$ : 274.1649, found: 274.1649.

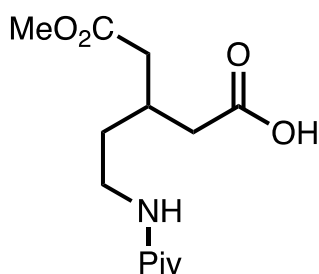

**4f**

**5-methoxy-5-oxo-3-(2-pivalamidoethyl)pentanoic acid (4f):** The title compound were prepared according to the representative procedure on a 200  $\mu\text{mol}$  using methyl 2-(1-pivaloylpiperidin-4-yl)acetate. Purification via acid-base extraction provided the title compound (**4f**) (31.2 mg, 57%) as a colorless oil.

$^1\text{H NMR}$  (500 MHz,  $\text{CDCl}_3$ )  $\delta$  6.17 (s, 1H), 3.68 (s, 3H), 3.39 – 3.28 (m, 1H), 3.23 (ddd,  $J = 14.0, 6.9, 5.5$  Hz, 1H), 2.53 – 2.28 (m, 5H), 1.59 (pd,  $J = 5.8, 2.6$  Hz, 2H), 1.20 (s, 9H);

$^{13}\text{C NMR}$  (126 MHz,  $\text{CDCl}_3$ )  $\delta$  179.6, 176.3, 173.2, 51.9, 38.9, 38.4, 37.2, 33.9, 29.2, 27.63, 27.61; **HRMS** (ESI): Calc'd for  $\text{C}_{13}\text{H}_{24}\text{NO}_5$   $[\text{M}+\text{H}]^+$ : 274.1649, found: 274.1649.

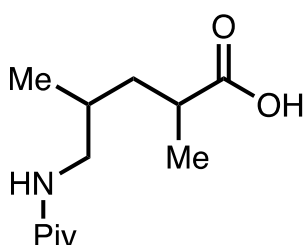

**4q**

**2,4-Dimethyl-5-pivalamidopentanoic acid (4q):** The title compound was prepared according to the representative procedure on a 200  $\mu\text{mol}$  scale using 1-(3,5-dimethylpiperidin-1-yl)-2,2-dimethylpropan-1-one. Purification using acid-base extraction provided the title compound (**4q**) (18.8 mg, 41%, mixture of diastereomers 1.0:0.5) as a slight yellowish oil.

$^1\text{H NMR}$  See  $^1\text{H NMR}$  spectrum (pg. S101).

$^{13}\text{C NMR}$  (126 MHz,  $\text{CDCl}_3$ )  $\delta$  182.1, 181.8, 179.3, 179.0, 45.2, 45.1, 38.9 (corresponding peak for minor diastereomer overlapping), 38.3, 38.2, 37.5, 36.9, 32.0, 31.3, 27.70, 27.68, 18.3, 18.0, 17.9, 17.3;

**HRMS** (ESI): Calc'd for C<sub>12</sub>H<sub>24</sub>NO<sub>3</sub> [M+H]<sup>+</sup>: 230.1751, found: 230.1751.

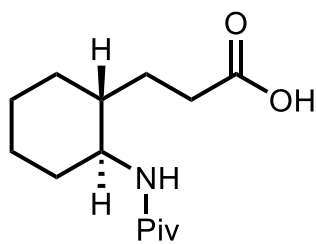

**4p**

**3-(2-Pivalamidocyclohexyl)propanoic acid (4p):** The title compound was prepared according to the representative procedure on a 200  $\mu$ mol scale using 2,2-dimethyl-1-(octahydroquinolin-1(2*H*)-yl)propan-1-one and one equivalent of tetrakis(acetonitrile)copper(I) tetrafluoroborate (63.0 mg, 0.20 mmol). Purification using acid-base extraction provided the title compound (**4p**) (26.5 mg, 52%) as a light orange amorphous solid.

**<sup>1</sup>H NMR** (500 MHz, CDCl<sub>3</sub>)  $\delta$  9.74 (br s, 1H), 6.32 (d, *J* = 7.8 Hz, 1H), 4.59 (td, *J* = 7.5, 5.0 Hz, 1H), 3.74 (s, 3H), 2.44 – 2.25 (m, 2H), 1.92 – 1.86 (m, 1H), 1.75 – 1.55 (m, 3H), 1.21 (s, 9H);

**<sup>13</sup>C NMR** (126 MHz, CDCl<sub>3</sub>)  $\delta$  178.8, 178.6, 51.99, 51.98, 42.6, 38.9, 33.8, 31.0, 27.7, 27.2, 25.7, 25.3;

**HRMS** (ESI): Calc'd for C<sub>14</sub>H<sub>26</sub>NO<sub>3</sub> [M+H]<sup>+</sup>: 256.1907, found: 256.1907.

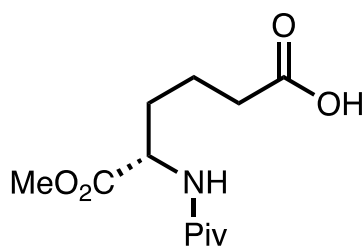

**4r**

**3-(2-Pivalamidocyclohexyl)propanoic acid (4r):** The title compound was prepared according to the representative procedure using 2,2-dimethyl-1-(octahydroquinolin-1(2*H*)-yl)propan-1-one. Purification using acid-base extraction provided the title compound (**4r**) (32.0 mg, 62%) as a yellow oil.

**<sup>1</sup>H NMR** (500 MHz, CDCl<sub>3</sub>)  $\delta$  9.73 (br s, 2H), 6.32 (d, *J* = 7.6 Hz, 1H), 4.59 (apparent td, *J* = 7.5, 5.1 Hz, 1H), 3.74 (s, 3H), 2.70 – 2.23 (m, 2H), 1.91 (apparent ddt, *J* = 12.3, 9.5, 5.1 Hz, 1H), 1.78 – 1.52 (m, 3H), 1.21 (s, 9H);

**<sup>13</sup>C NMR** (126 MHz, CDCl<sub>3</sub>)  $\delta$  178.8, 178.0, 173.2, 52.6, 51.8, 38.9, 33.3, 31.8, 27.5, 20.5;

**HRMS** (ESI): Calc'd for C<sub>12</sub>H<sub>22</sub>NO<sub>5</sub> [M+H]<sup>+</sup>: 260.1492, found: 260.1493.

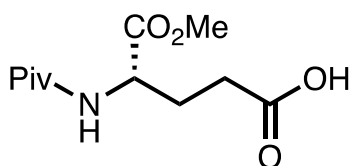

**4s**



**2-(1-(2-pivalamidoethyl)cyclopropyl)acetic acid (4u):** The title compound was prepared according to the representative procedure on a 200  $\mu$ mol scale using 2,2-dimethyl-1-(6-azaspiro[2.5]octan-6-yl)propan-1-one. Purification using acid-base extraction provided the title compound (**4u**) (25.0 mg, 55%) as a yellowish oil.

**$^1\text{H}$  NMR** (500 MHz,  $\text{CDCl}_3$ )  $\delta$  6.30 (br s, 1H), 3.34 (td,  $J = 6.8, 5.5$  Hz, 2H), 2.31 (s, 2H), 1.57 (t,  $J = 6.8$  Hz, 2H), 1.18 (s, 9H), 0.51 – 0.46 (m, 2H), 0.46 – 0.41 (m, 2H).

**$^{13}\text{C}$  NMR** (126 MHz,  $\text{CDCl}_3$ )  $\delta$  179.0, 177.1, 41.0, 38.7, 37.7, 36.3, 27.6, 15.2, 12.3.

**HRMS** (ESI): Calc'd for  $\text{C}_{12}\text{H}_{22}\text{NO}_3$   $[\text{M}+\text{H}]^+$ : 228.1595, found: 228.1595.

## 2.9 Procedures for Peptide Diversification

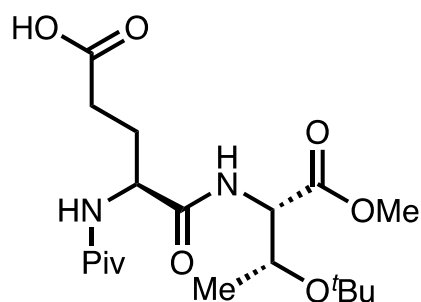

6a

**(S)-5-(((2S,3R)-3-(tert-Butoxy)-1-methoxy-1-oxobutan-2-yl)amino)-5-oxo-4-pivalamidopentanoic acid (6a):** The title compound was prepared according to the representative procedure using methyl (3R)-3-(tert-butoxy)-2-((S)-1-pivaloylpyrrolidine-2-carboxamido)butanoate (**5a**) with 1:1 acetone/H<sub>2</sub>O as solvent. Purification using acid-base extraction provided the title compound **6a** (22.5 mg, 56%, mixture of rotamers 1:0.8) as a slightly yellow oil.

**<sup>1</sup>H NMR** (500 MHz, CDCl<sub>3</sub>) δ 7.06 (t, J = 9.3 Hz), 6.92 (d, J = 7.3 Hz), 6.77 (d, J = 7.7 Hz), 4.68 – 4.58 (m), 4.45 (ddd, J = 9.2, 4.4, 1.8 Hz), 4.23 (dtd, J = 12.6, 6.2, 1.8 Hz), 3.70 (d, J = 5.0 Hz), 2.60 – 2.41 (m), 2.26 – 2.14 (m), 2.09 – 1.95 (m), 1.21 (d, J = 9.0 Hz), 1.16 (dd, J = 6.3, 4.9 Hz), 1.10 (d, J = 7.3 Hz);

**<sup>13</sup>C NMR** (126 MHz, CDCl<sub>3</sub>) δ 179.5, 179.3, 176.9, 176.6, 172.24, 172.20, 171.3, 171.1, 74.5, 74.4, 67.4, 67.3, 58.3, 58.1, 52.9, 52.5, 52.3, 39.0, 38.9, 30.5, 30.2, 28.4, 28.2, 27.6, 27.5, 21.09, 21.08;

**HRMS** (ESI): Calc'd for C<sub>18</sub>H<sub>29</sub>N<sub>3</sub>O<sub>2</sub> [M+H]<sup>+</sup>: 403.2439, found: 403.2439.

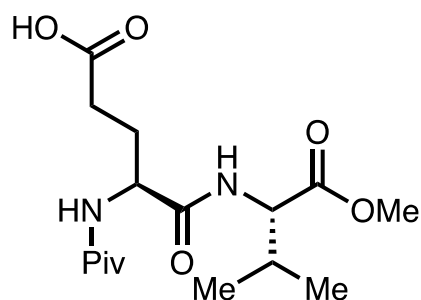

6b

**(S)-5-(((S)-1-Methoxy-3-methyl-1-oxobutan-2-yl)amino)-5-oxo-4-pivalamidopentanoic acid (6b):** The title compound was prepared according to the representative procedure using methyl pivaloyl-L-prolyl-L-valinate (**5b**). Purification using acid-base extraction provided the title compound **6b** (25.5 mg, 74%, mixture of rotamers 1:0.5) as a slightly yellow oil.

**<sup>1</sup>H NMR** (500 MHz, CDCl<sub>3</sub>) δ 7.50 (t, J = 8.2 Hz), 6.84 (d, J = 8.0 Hz), 4.74 – 4.65 (m), 4.45 (dd, J = 8.7, 5.1 Hz), 4.42 (dd, J = 8.3, 5.2 Hz), 3.72 (s), 3.70 (s), 2.48 (qd, J = 5.7, 2.3 Hz), 2.24 – 2.05 (m), 2.01 – 1.88 (m), 1.29 – 1.22 (m), 1.19 (s), 1.18 (s), 0.95 – 0.88 (m);

**<sup>13</sup>C NMR** (126 MHz, CDCl<sub>3</sub>) δ 179.8, 179.7, 176.3, 176.2, 172.2, 172.1, 172.0, 57.9, 57.7, 52.29, 52.28, 52.2, 52.1, 38.94, 38.91, 38.6, 31.0, 30.7, 30.3, 30.1, 27.4, 27.2, 19.2, 19.1, 17.84, 17.83;

**HRMS** (ESI): Calc'd for C<sub>15</sub>H<sub>23</sub>N<sub>9</sub>O [M+H]<sup>+</sup>: 345.2020, found: 345.2019.

### Procedures for Peptide Diversification from Dipeptide 6b

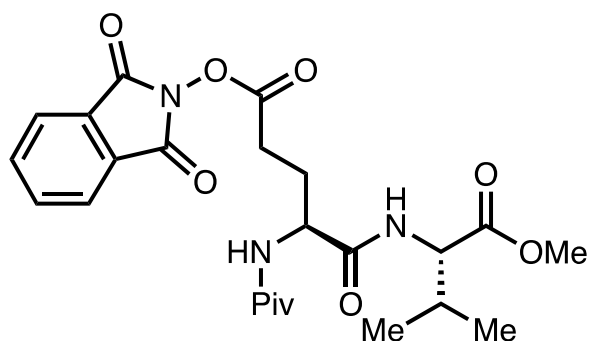

**7a**

**1,3-dioxoisindolin-2-yl (S)-5-(((S)-1-methoxy-3-methyl-1-oxobutan-2-yl)amino)-5-oxo-4-pivalamidopentanoate (7a):** A 2-dram vial was charged with carboxylic acid **5b** (207 mg, 0.6 mmol), *N*-hydroxyphthalimide (NHPI; 97.9 mg, 0.6 mmol), *N,N'*-dicyclohexylcarbodiimide (DCC; 123.8 mg, 0.6 mmol), and dry CH<sub>2</sub>Cl<sub>2</sub> (3.0 mL), and the reaction mixture was allowed to stir at room temperature overnight. The mixture was concentrated under reduced pressure, and the resulting crude material was purified by column chromatography (1:2 Hexanes/EtOAc) to provide the title compound **7a** (237 mg, 80%, mixture of rotamers 1:1) as an off-white solid.

**<sup>1</sup>H NMR** (500 MHz, CDCl<sub>3</sub>) δ 7.88 (ddd, J = 5.5, 2.5, 0.9 Hz), 7.79 (ddd, J = 5.5, 3.1, 0.9 Hz), 6.97 (s), 6.44 (d, J = 8.3 Hz), 4.78 – 4.57 (m), 4.47 (ddd, J = 8.5, 4.9, 1.4 Hz), 3.73 (d, J = 0.9 Hz), 3.72 (d, J = 1.1 Hz), 3.04 – 2.83 (m), 2.82 – 2.60 (m), 2.48 – 2.25 (m), 2.18 (dq, J = 15.0, 6.7, 3.6 Hz), 1.23 (d, J = 0.8 Hz), 1.21 (d, J = 0.7 Hz), 0.94 (dd, J = 10.4, 7.0 Hz), 0.91 (dd, J = 6.9, 1.5 Hz);

**<sup>13</sup>C NMR** (126 MHz, CDCl<sub>3</sub>) δ 179.5, 179.1, 171.9, 171.2, 171.1, 169.69, 169.67, 169.6, 162.0, 161.9, 135.0, 129.0, 124.2, 57.7, 57.6, 52.34, 52.30, 52.2, 52.1, 39.01, 38.95, 31.1, 30.9, 27.8, 27.7, 27.57, 27.55, 27.3, 27.1, 19.2, 19.1, 17.8;

**HRMS** (ESI): Calc'd for C<sub>24</sub>H<sub>32</sub>N<sub>2</sub>O<sub>8</sub> [M+H]<sup>+</sup>: 490.2184, found: 490.2184.

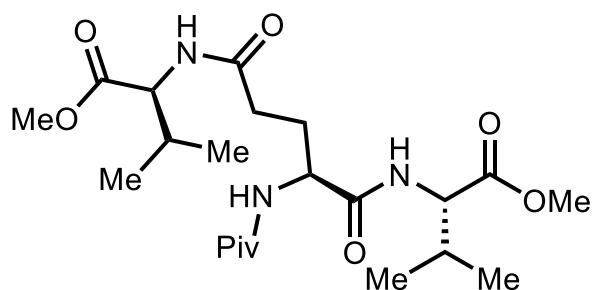

**7b**

**Dimethyl 2,2'-(((S)-2-pivalamidopentanedioyl)bis(azanediyl))(2S,2'S)-bis(3-methylbutanoate) (7b):** A 1-dram vial was charged with carboxylic acid **5b** (34.4 mg, 0.1 mmol), *L*-valine methyl ester hydrochloride (18.4 mg, 0.11 mmol), hydroxybenzotriazole (HOBt; 13.5 mg, 0.1 mmol), and dry CH<sub>2</sub>Cl<sub>2</sub> (1.5 mL) and cooled to 0 °C in an ice bath. *i*Pr<sub>2</sub>Net (23 μL, 0.13 mmol) was added to the mixture dropwise over 5 min, and the resulting mixture was stirred at 0 °C for 10 min. To this mixture was added 1-(3-dimethylaminopropyl)-3-ethylcarbodiimide hydrochloride (EDC; 21.1 mg, 0.11 mmol), and the mixture was allowed to stir and warm to room temperature over 16 h. The reaction mixture was cooled to 0 °C and quenched with 1 M HCl (1 mL). The phases were separated, and the aqueous phase was extracted with CH<sub>2</sub>Cl<sub>2</sub> (3 mL × 3). The combined organic layers were washed with brine (1 mL), dried over Na<sub>2</sub>SO<sub>4</sub>, filtered, and concentrated under reduced pressure. The resulting crude material was purified by column chromatography (1:2 Hexanes/EtOAc) to provide the title compound **7b** (22.9 mg, 50%, mixture of rotamers) as a white amorphous solid.

<sup>1</sup>H NMR (500 MHz, CDCl<sub>3</sub>) δ 8.06 (d, J = 8.3 Hz), 7.81 (d, J = 8.8 Hz), 7.30 (d, J = 8.5 Hz), 7.11 (d, J = 9.0 Hz), 6.86 (d, J = 6.8 Hz), 6.46 (d, J = 7.1 Hz), 4.82 (dddd, J = 8.1, 6.9, 2.5, 1.3 Hz), 4.55 (dddd, J = 8.8, 6.4, 5.3, 1.1 Hz), 4.48 – 4.40 (m), 4.28 (ddd, J = 9.3, 7.1, 5.6 Hz), 3.74 (d, J = 0.9 Hz), 3.73 (d, J = 0.8 Hz), 3.73 (d, J = 0.8 Hz), 3.71 (d, J = 0.9 Hz), 2.46 (dd, J = 6.1, 4.3 Hz), 2.43 (dd, J = 6.0, 4.3 Hz), 2.40 – 1.87 (m), 1.18 (d, J = 0.9 Hz), 1.15 (d, J = 0.9 Hz), 1.07 – 0.86 (m);

<sup>13</sup>C NMR (126 MHz, CDCl<sub>3</sub>) δ 179.6, 178.3, 174.7, 173.9, 173.8, 173.3, 173.0, 172.4, 172.1, 58.6, 57.7, 57.63, 57.58, 52.7, 52.6, 52.42, 52.41, 52.24, 52.22, 38.8, 38.7, 32.6, 32.4, 30.8, 30.5, 30.4, 29.7, 28.9, 27.53, 27.52, 19.5, 19.3, 19.2, 19.1, 18.1, 18.0, 17.93, 17.90.

HRMS (ESI): Calc'd for C<sub>24</sub>H<sub>32</sub>NO<sub>8</sub> [M+H]<sup>+</sup>: 458.2861, found: 458.2864.

## 2.10 Procedure for Deconstructive Minisci Reaction

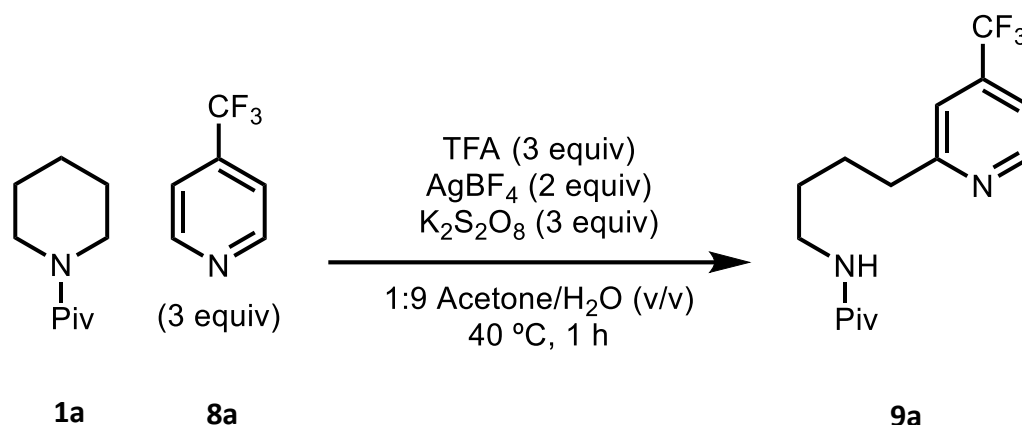

A 1-dram vial was charged with **1a** (33.9 mg, 0.20 mmol), **8a** (88.3 mg, 0.60 mmol), and 2.0 mL of a 1:9 acetone:H<sub>2</sub>O solution by volume. Trifluoroacetic acid (46  $\mu$ L, 0.60 mmol) was added to the mixture, and the contents were allowed to stir for 5 min. Potassium persulfate (162 mg, 0.60 mmol) and silver tetrafluoroborate (78 mg, 0.40 mmol) were added and the mixture was allowed to stir at 40 °C. After 1 h, CH<sub>2</sub>Cl<sub>2</sub> (2.0 mL) was added and the phases were separated. The aqueous layer was extracted with CH<sub>2</sub>Cl<sub>2</sub> (2.0 mL  $\times$  3). The combined organic layers were dried over Na<sub>2</sub>SO<sub>4</sub>, filtered, and concentrated under reduced pressure. The resulting crude mixture was purified by preparative thin-layer chromatography (50% EtOAc/hexanes) to provide *N*-(4-(4-(trifluoromethyl)pyridin-2-yl)butyl)pivalamide (**9a**) (29 mg, 48%) as a yellow oil.

<sup>1</sup>H NMR (700 MHz, CDCl<sub>3</sub>)  $\delta$  8.71 (d, *J* = 5.2 Hz, 1H), 7.40 (s, 1H), 7.37 (d, *J* = 5.2 Hz, 1H), 5.84 (s, 1H), 3.28 (td, *J* = 7.0, 5.7 Hz, 2H), 2.92 (t, *J* = 7.7 Hz, 2H), 1.84 – 1.75 (m, 2H), 1.57 (p, *J* = 7.2 Hz, 2H), 1.17 (s, 9H).

<sup>13</sup>C NMR (176 MHz, CDCl<sub>3</sub>)  $\delta$  178.7, 163.4, 149.8, 139.3 (q, *J* = 34.2 Hz), 122.9 (q, *J* = 273.3 Hz), 118.9 (q, *J* = 3.7 Hz), 117.2 (q, *J* = 3.4 Hz), 39.3, 38.8, 37.4, 29.2, 27.7, 26.9.

<sup>19</sup>F NMR (376 MHz, CDCl<sub>3</sub>)  $\delta$  -64.07 (s, 3F).

HRMS (ESI): Calc'd for C<sub>15</sub>H<sub>22</sub>F<sub>3</sub>N<sub>2</sub>O [M+H]<sup>+</sup>: 303.1679, found: 303.1687.

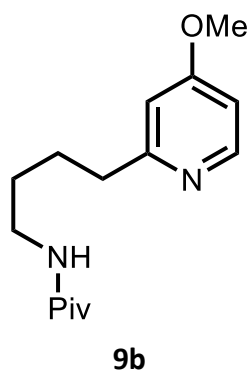

**N**-(4-(4-Methoxypyridin-2-yl)butyl)pivalamide (**9b**): The title compound was prepared according to the representative procedure using **1a** and **8b**. Purification by preparative thin-layer chromatography (8% MeOH/CH<sub>2</sub>Cl<sub>2</sub>) provided the title compound (35.7 mg, 67%) as a yellow oil.



**<sup>1</sup>H NMR** (700 MHz, CDCl<sub>3</sub>) δ 8.4 (d, *J* = 5.6 Hz, 1H), 6.7 (dt, *J* = 8.1, 2.4 Hz, 2H), 5.9 (s, 1H), 3.9 (s, 3H), 3.3 (td, *J* = 6.9, 5.5 Hz, 2H), 2.8 (t, *J* = 7.6 Hz, 2H), 1.8 – 1.8 (m, 2H), 1.6 (p, *J* = 7.2 Hz, 2H), 1.2 (s, 9H);

**<sup>13</sup>C NMR** (126 MHz, CDCl<sub>3</sub>) δ 178.6, 166.3, 163.5, 150.3, 108.9, 107.7, 55.2, 39.5, 38.8, 37.8, 29.0, 27.8, 27.1;

**HRMS** (ESI): Calc'd for C<sub>15</sub>H<sub>25</sub>N<sub>2</sub>O<sub>2</sub> [M+H]<sup>+</sup>: 265.1911, found: 265.1910.

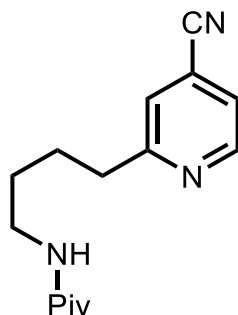

**9c**

**N-(4-(4-cyanopyridin-2-yl)butyl)pivalamide (9c)**: The title compound was prepared according to the representative procedure using **1a** and **8c**. Purification by preparative thin-layer chromatography (5% MeOH/CH<sub>2</sub>Cl<sub>2</sub>) provided the title compound (26.7 mg, 51%) as a colorless oil.

**<sup>1</sup>H NMR** (400 MHz, CDCl<sub>3</sub>) δ 8.73 (dd, *J* = 5.1, 0.9 Hz, 1H), 7.43 (s, 1H), 7.39 (dd, *J* = 5.0, 1.5 Hz, 1H), 5.88 (s, 1H), 3.30 (td, *J* = 6.9, 5.6 Hz, 2H), 2.91 (t, *J* = 7.6 Hz, 2H), 1.79 (tt, *J* = 8.9, 6.9 Hz, 2H), 1.64 – 1.39 (m, 2H), 1.21 (s, 9H).

**<sup>13</sup>C NMR** (101 MHz, CDCl<sub>3</sub>) δ 178.8, 163.6, 150.1, 124.7, 122.7, 121.0, 116.7, 39.2, 38.7, 37.5, 29.1, 27.7, 26.7.

**HRMS** (ESI): Calc'd for C<sub>15</sub>H<sub>22</sub>N<sub>3</sub>O [M+H]<sup>+</sup>: 260.1758, found: 260.1758.

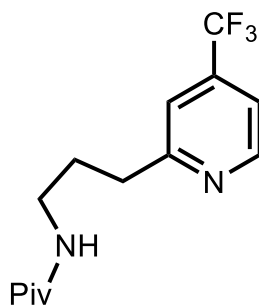

**9d**

**N-(3-(4-(trifluoromethyl)pyridin-2-yl)propyl)pivalamide (9d)**: The title compound was prepared according to the representative procedure using **1m** and **8a**. Purification by preparative thin-layer chromatography (50% EtOAc/hexanes) provided the title compound (35.8 mg, 62%) as a yellow oil.

**<sup>1</sup>H NMR** (500 MHz, CDCl<sub>3</sub>): δ 8.69 (d, *J* = 5.2 Hz, 1H), 7.37 (s, 1H), 7.34 (d, *J* = 5.2 Hz, 1H), 6.11 (s, 1H), 3.31 (q, *J* = 6.6 Hz, 2H), 2.92 (t, *J* = 7.4 Hz, 2H), 1.99 (p, *J* = 7.1 Hz, 2H), 1.17 (s, 9H);

**<sup>13</sup>C NMR** (126 MHz, CDCl<sub>3</sub>) δ 178.7, 163.1, 150.3, 138.9 (q, *J* = 33.9 Hz), 122.9 (q, *J* = 273.1 Hz), 118.7 (q, *J* = 3.6 Hz), 117.0 (q, *J* = 3.5 Hz), 39.2, 38.8, 35.7, 28.9, 27.7.

$^{19}\text{F}$  NMR (470 MHz,  $\text{CDCl}_3$ )  $\delta$  -64.85 (s, 3F);

HRMS (ESI): Calc'd for  $\text{C}_{14}\text{H}_{20}\text{F}_3\text{N}_2\text{O}$   $[\text{M}+\text{H}]^+$ : 289.1522, found: 289.1531.

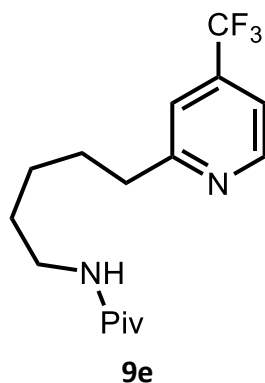

**N-(5-(4-(Trifluoromethyl)pyridin-2-yl)pentyl)pivalamide (9e):** The title compound was prepared according to the representative procedure using **1n** and **8a**. Purification by preparative thin-layer chromatography (50% EtOAc/hexanes) provided the title compound (32.8 mg, 52%) as a yellow oil.

$^1\text{H}$  NMR (500 MHz,  $\text{CDCl}_3$ )  $\delta$  8.68 (d,  $J = 5.1$  Hz, 1H), 7.34 (s, 1H), 7.32 (dd,  $J = 5.1, 1.6$  Hz, 1H), 5.62 (s, 1H), 3.23 (td,  $J = 7.2, 5.7$  Hz, 2H), 2.92 – 2.79 (m, 2H), 1.85 – 1.73 (m, 2H), 1.54 (p,  $J = 7.3$  Hz, 2H), 1.43 – 1.33 (m, 2H), 1.16 (s, 9H).

$^{13}\text{C}$  NMR (126 MHz,  $\text{CDCl}_3$ )  $\delta$  178.5, 163.8, 150.3, 138.7 (q,  $J = 33.7$  Hz), 123.0 (q,  $J = 273.1$  Hz), 118.4 (q,  $J = 3.6$  Hz), 116.8 (q,  $J = 3.6$  Hz), 39.4, 38.8, 38.3, 29.6, 29.3, 27.7, 26.6.

$^{19}\text{F}$  NMR (470 MHz,  $\text{CDCl}_3$ )  $\delta$  -64.82 (s, 3F).

HRMS (ESI): Calc'd for  $\text{C}_{16}\text{H}_{24}\text{F}_3\text{N}_2\text{O}$   $[\text{M}+\text{H}]^+$ : 317.1836, found: 317.1835.

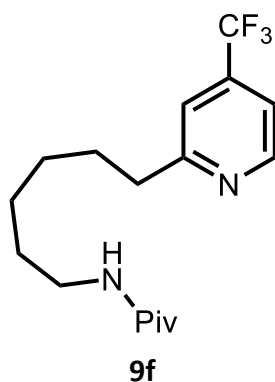

**N-(6-(4-(Trifluoromethyl)pyridin-2-yl)hexyl)pivalamide (9f):** The title compound was prepared according to the representative procedure using **1o** and **8a**. Purification by preparative thin-layer chromatography (50% EtOAc/hexanes) provided the title compound (26.1 mg, 39%) as a yellow oil.

$^1\text{H}$  NMR (500 MHz,  $\text{CDCl}_3$ )  $\delta$  8.71 (d,  $J = 5.2$  Hz, 1H), 7.37 (s, 1H), 7.34 (d,  $J = 4.9$  Hz, 1H), 5.62 (s, 1H), 3.22 (td,  $J = 7.3, 5.7$  Hz, 2H), 2.90 – 2.84 (m, 2H), 1.76 (p,  $J = 7.3$  Hz, 2H), 1.51 (p,  $J = 7.3$  Hz, 2H), 1.38 (qd,  $J = 9.8, 9.3, 4.1$  Hz, 4H), 1.19 (s, 9H).

$^{13}\text{C}$  NMR (151 MHz,  $\text{CDCl}_3$ )  $\delta$  178.5, 164.0, 150.2, 138.8, 126.2 – 119.8 (m), 118.5 (q,  $J = 4.0, 3.5$  Hz), 116.9 (q,  $J = 3.4$  Hz), 39.6, 38.8, 38.3, 31.1, 29.6, 29.0, 27.8, 26.7.

$^{19}\text{F}$  NMR (376 MHz,  $\text{CDCl}_3$ )  $\delta$  -64.01 (s, 3F).

**HRMS** (ESI): Calc'd for C<sub>17</sub>H<sub>26</sub>F<sub>3</sub>N<sub>2</sub>O [M+H]<sup>+</sup>: 331.1992, found: 331.1991.

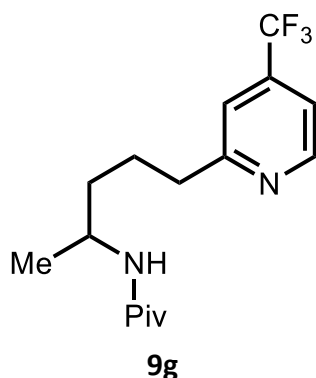

**N-(5-(4-(Trifluoromethyl)pyridin-2-yl)pentan-2-yl)pivalamide (9g)**: The title compound was prepared according to the representative procedure using **1g** and **8a**. Purification by preparative thin-layer chromatography (50% EtOAc/hexanes) provided the title compound (31.8 mg, 50%) as a yellow oil.

**<sup>1</sup>H NMR** (500 MHz, CDCl<sub>3</sub>) δ 8.61 (d, *J* = 5.2 Hz, 1H), 7.27 (s, 1H), 7.24 (dd, *J* = 5.2, 1.6 Hz, 1H), 5.42 – 5.32 (m, 1H), 3.95 (dq, *J* = 8.4, 6.6 Hz, 2H), 2.80 (qdd, *J* = 13.9, 8.7, 6.6 Hz, 2H), 1.68 (dddt, *J* = 18.3, 13.9, 8.9, 6.6 Hz, 2H), 1.47 – 1.35 (m, 2H), 1.09 (s, 9H), 1.03 (d, *J* = 6.6 Hz, 3H).

**<sup>13</sup>C NMR** (126 MHz, CDCl<sub>3</sub>) δ 177.9, 163.6, 150.2, 138.8 (q, *J* = 33.6 Hz), 123.0 (q, *J* = 273.1 Hz), 118.6 (q, *J* = 3.5 Hz), 116.9 (q, *J* = 3.5 Hz), 44.8, 38.7, 38.0, 36.6, 27.7, 26.2, 21.1.

**<sup>19</sup>F NMR** (470 MHz, CDCl<sub>3</sub>) δ -64.84 (s, 3F).

**HRMS** (ESI): Calc'd for C<sub>16</sub>H<sub>24</sub>F<sub>3</sub>N<sub>2</sub>O [M+H]<sup>+</sup>: 317.1835, found: 317.1836.

## 2.11 Procedure for Autocyclization Reaction

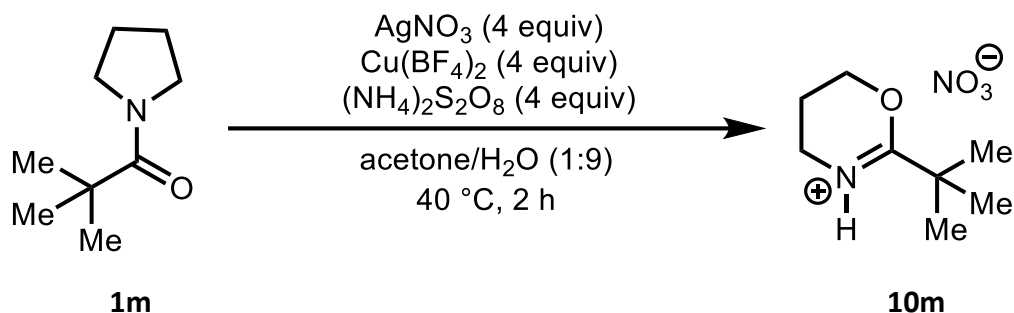

**2-(tert-Butyl)-5,6-dihydro-4H-1,3-oxazine (10m):** To a 1-dram vial was added, sequentially, cyclic amine **1m** (31.1 mg, 0.20 mmol, 1 equiv), silver nitrate (136 mg, 0.80 mmol, 4 equiv), copper(II) tetrafluoroborate (190 mg, 0.80 mmol, 4 equiv), ammonium persulfate (183 mg, 0.80 mmol, 4 equiv) and 1 ml of a 1:1 acetone: $\text{H}_2\text{O}$  solution. The resulting mixture was then stirred at  $40^\circ\text{C}$  for 2 h. The reaction mixture was diluted with water (0.5 mL) and extracted with 3 x 3 mL of diethylether and the organic layers were discarded. The aqueous layer was then extracted with DCM (3 x 3 mL) and the combined DCM layers were dried over  $\text{Na}_2\text{SO}_4$ , filtered, and concentrated under reduced pressure, affording the title compound as a white solid (26.5 mg, 65%).

$^1\text{H NMR}$  (500 MHz,  $\text{CDCl}_3$ )  $\delta$  10.1 (s, 1H), 4.7 (t,  $J = 5.5$  Hz, 2H), 3.7 (d,  $J = 5.9$  Hz, 2H), 2.2 (p,  $J = 5.7$  Hz, 2H), 1.3 (d,  $J = 1.3$  Hz, 9H).

$^{13}\text{C NMR}$  (126 MHz,  $\text{CDCl}_3$ )  $\delta$  182.0, 70.0, 39.4, 39.1, 26.3, 18.7.

**HRMS** (ESI): Calc'd for  $\text{C}_8\text{H}_{16}\text{NO}$   $[\text{M}+\text{H}]^+$ : 142.1226, found: 142.1227.

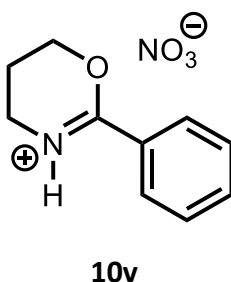

**2-phenyl-5,6-dihydro-4H-1,3-oxazine (10v):** The title compound was prepared according to the representative procedure using phenyl(piperidin-1-yl)methanone. Preparative TLC (1:1  $\text{Et}_2\text{O}/\text{DCM}$ ) afforded the title compound **10v** (18.0 mg, 40%) as a white solid.

$^1\text{H NMR}$  (500 MHz,  $\text{CDCl}_3$ )  $\delta$  11.54 (s, 1H), 8.01 – 7.93 (m, 2H), 7.67 (td,  $J = 7.4, 1.2$  Hz, 1H), 7.51 (t,  $J = 8.0$  Hz, 2H), 4.81 (t,  $J = 5.4$  Hz, 2H), 3.83 (t,  $J = 6.0$  Hz, 2H), 2.30 (p,  $J = 5.8$  Hz, 2H).

$^{13}\text{C NMR}$  (126 MHz,  $\text{CDCl}_3$ )  $\delta$  168.9, 135.7, 129.5, 128.5, 125.4, 70.2, 39.6, 19.1.

**HRMS** (ESI): Calc'd for  $\text{C}_{10}\text{H}_{12}\text{NO}$   $[\text{M}+\text{H}]^+$ : 162.0913, found: 162.0914.

## 2.12 Counterion Effect for Autocyclization Reaction

The autocyclization reaction was conducted according to the representative procedure above but instead using copper salts with different counter-anions to determine whether other products, such as the expected olefin or ligand-transfer products<sup>8</sup>, might be formed. The only materials observed were the open chain aldehyde, carboxylic acid, cyclization product, and unreacted substrate.

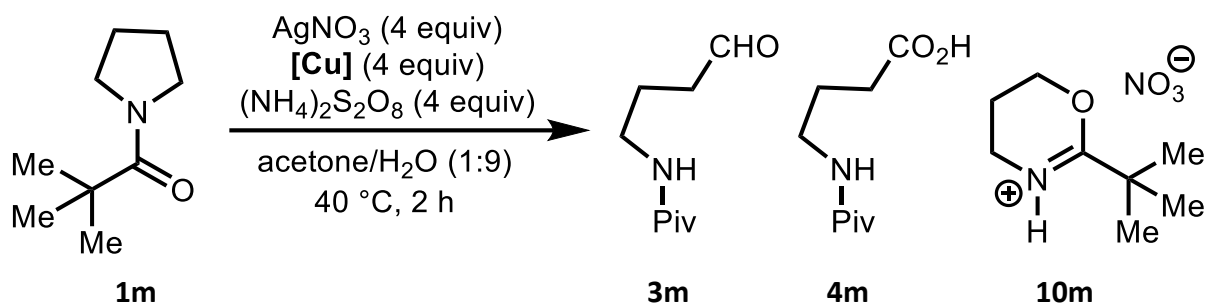

**Table S8.** Results of autocyclization reaction with various copper salts.

| $[\text{Cu}]$                                      | recovered <b>1m</b><br>[%] <sup>#</sup> | <b>3m</b> yield<br>[%] <sup>#</sup> | <b>4m</b> yield<br>[%] <sup>#</sup> | <b>10m</b> yield<br>[%] <sup>#</sup> |
|----------------------------------------------------|-----------------------------------------|-------------------------------------|-------------------------------------|--------------------------------------|
| $\text{CuCl}_2$                                    | 33                                      | 3                                   | 5                                   | —                                    |
| $\text{CuBr}_2$                                    | 69                                      | 3                                   | 3                                   | —                                    |
| $\text{Cu}(\text{OAc})_2 \cdot \text{H}_2\text{O}$ | 16                                      | 9                                   | 15                                  | 3                                    |
| $\text{CuSO}_4 \cdot 5\text{H}_2\text{O}$          | —                                       | —                                   | 13                                  | 12                                   |
| $\text{Cu}(\text{MeCN})_4\text{BF}_4$              | —                                       | —                                   | 46                                  | 6                                    |

<sup>#</sup> Yield and conversion by  $^1\text{H}$  integration using  $\text{Ph}_3\text{CH}$  as internal standard.

### 3. Computational Details

#### 3.1 General Computational Considerations for Photo- and Copper-Mediated Reactions

Optimization of all reported structures and frequency calculations for the reactions of (a) the riboflavin tetraacetate (**2a**), potassium persulfate, and N-Piv-piperidine (**1a**), as well as the reaction of (b) CuBF<sub>4</sub>, sodium-persulfate, and N-Piv-piperidine (**1a**) were performed using the Gaussian-16 suite of programs<sup>9</sup> at the B3LYP-D3(BJ)/[6-31G(d,p) + Lanl2dz (Cu)] level of theory with the corresponding Hay-Wadt effective core potential<sup>10-12</sup> for Cu. Therefore, in the calculations described here, we used the B3LYP density functional<sup>13-15</sup> with Grimme's empirical dispersion-correction (D3)<sup>16</sup> and Becke-Johnson (BJ) damping-correction.<sup>17-19</sup> Frequency analyses were used to characterize each minimum and transition state (TS) with zero and one imaginary frequency, respectively. Intrinsic reaction coordinate (IRC) calculations were performed for all TSs to ensure their true nature. Bulk solvent effects were incorporated for all calculations (including geometry optimizations and frequency calculations) using the self-consistent reaction field polarizable continuum model (IEF-PCM).<sup>20,21</sup> Water was chosen as solvent. The reported thermodynamic data were computed at a temperature of 298.15 K and at 1 atm of pressure. Various spin states (including the open-shell singlet states, where that is appropriate) were considered for all key species. All UV-Vis calculations were performed at the TD-DFT [14] level of theory.<sup>22</sup> Previously, we<sup>23,24</sup> and others<sup>25,26</sup> have demonstrated that the B3LYP-D3(BJ) and B3LYP are a reasonable choice for geometry optimization, frequency calculations, as well as for calculation of the relative energies. The role of intersystem crossing (ISC) was examined by locating low energy points on the singlet-triplet crossing surfaces, or seams. These points, which we call minima on the seam of crossing (MSX), were searched using the MECPRO optimize [see: Hamill LA, Snyder JD, Ess DH (2016) MECPro Version 1.0.3: Minimum Energy Crossing Program] by starting from each of the triplet and singlet minima along the reaction pathway. We used the xTB's Conformer-Rotamer Ensemble Sampling Tool (CREST) software to identify possible stable conformers of **{(2.A.m)-[K<sub>2</sub>S<sub>2</sub>O<sub>8</sub>]}** and **{(2.A.m)-[K<sub>2</sub>S<sub>2</sub>O<sub>8</sub>]}-(1a)**. In these calculations, conformers were sampled using the MF-MD-GC workflow. Later, we utilized the outcomes of these conformational analyses in our DFT calculations, and always have validated the related potential conformers. However, in this Article, we discussed only lowest energy structures.

### 3.2 Critical Interactions in $\{(2.A.m)-[K_2S_2O_8]\}$ and $\{(2.A.m)-[K_2S_2O_8]\}-(1a)$

We wish to emphasize that our initial conformational analyses of  $\{(2.A.m) - [K_2S_2O_8]\}$  and  $\{(2.A.m)-[K_2S_2O_8]\}-(1a)$ , performed using the xTB's Conformer-Rotamer Ensemble Sampling Tool (CREST) software, have enabled us to identify several critically important interactions both between **(2.A.m)** and  $K_2S_2O_8$  as well as between the  $\{(2.A.m) - [K_2S_2O_8]\}$  unit and substrate **1a** (See Figure S6). Over the course of this study, we always have utilized these interactions for design of our DFT calculations. Thus, we always validated the related potential conformers, and we discuss only the lowest energy structures in this Article.

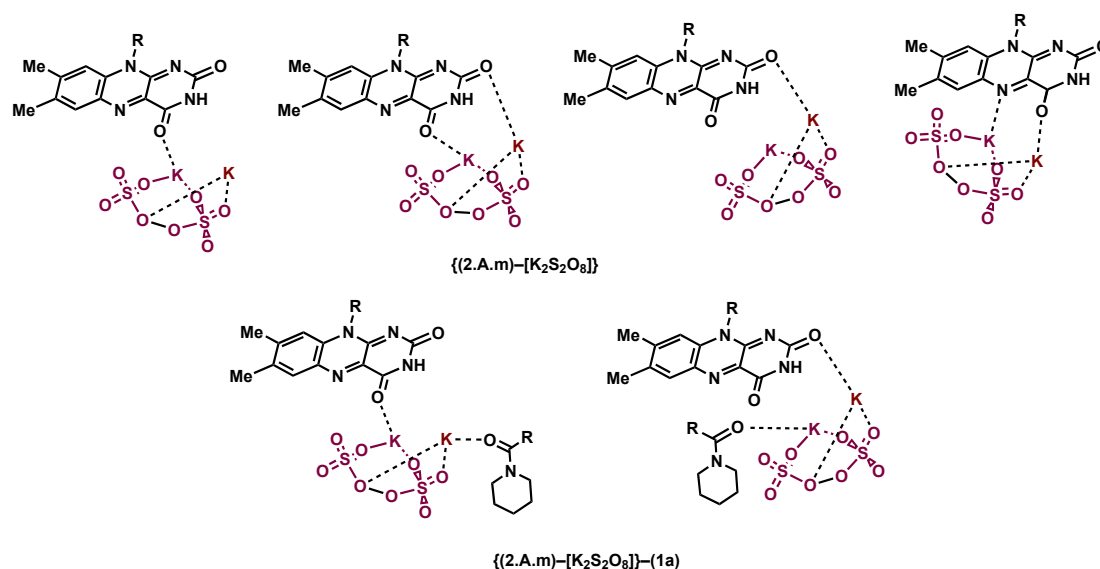

**Figure S6.** The validated conformers of the  $\{(2.A.m)-[K_2S_2O_8]\}$  and  $\{(2.A.m)-[K_2S_2O_8]\}-(1a)$  structures.

### 3.3 Verification of Photocatalyst Model

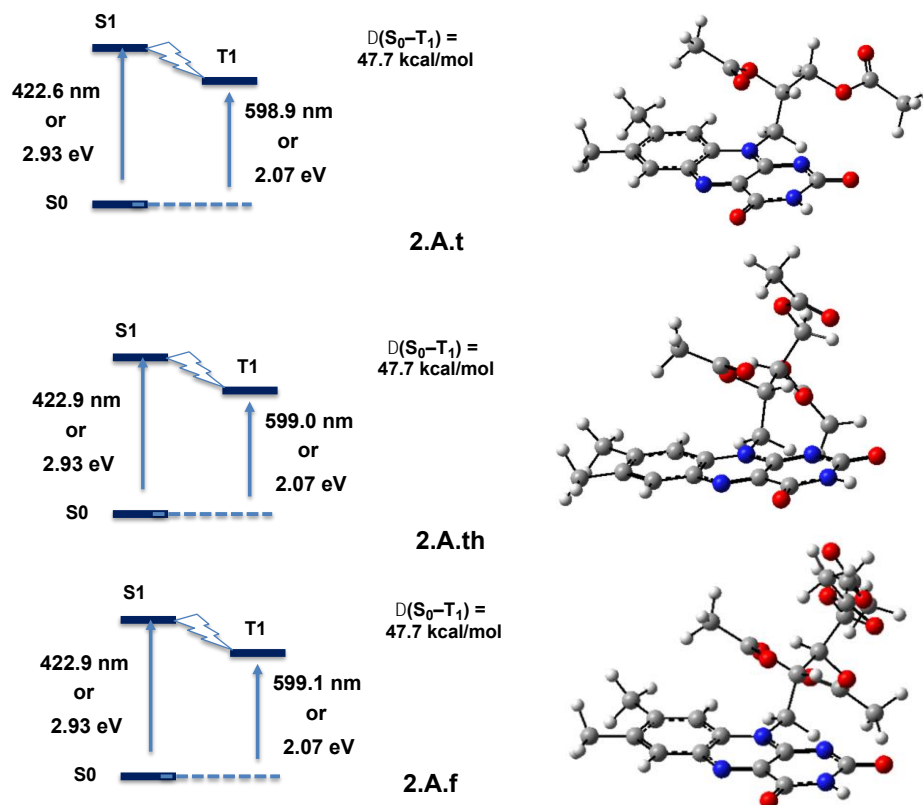

**Figure S7.** Validation for the use of the isoalloxazine monoacetate as a model for isoalloxazine tetraacetate.

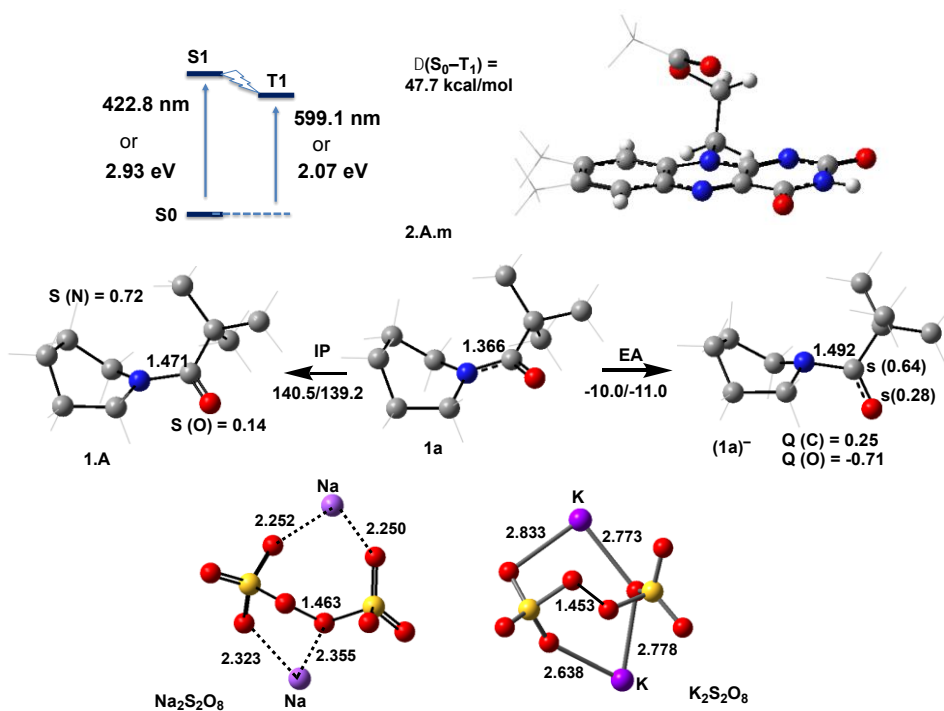

**Figure S8.** The calculated geometry parameters and relative energies of isoalloxazine monoacetate, (2.A.m), substrate 1a, iminium ion 1.A, Na<sub>2</sub>S<sub>2</sub>O<sub>8</sub>, and K<sub>2</sub>S<sub>2</sub>O<sub>8</sub>.



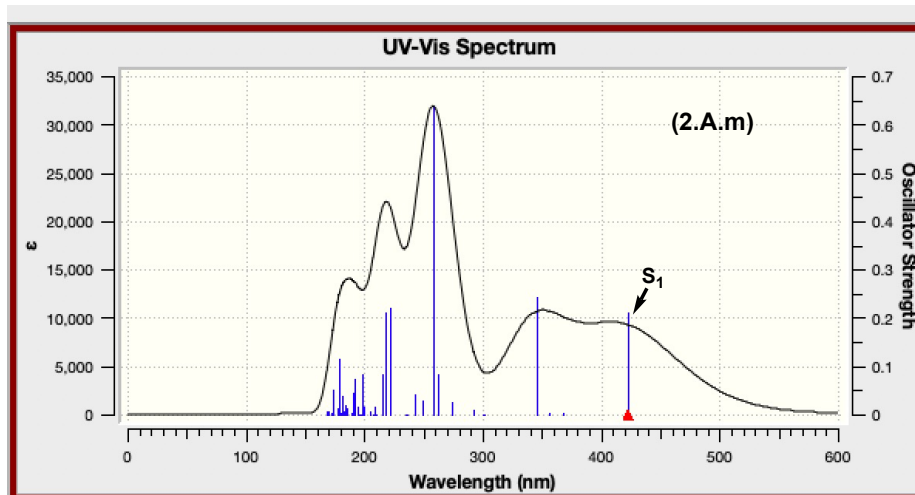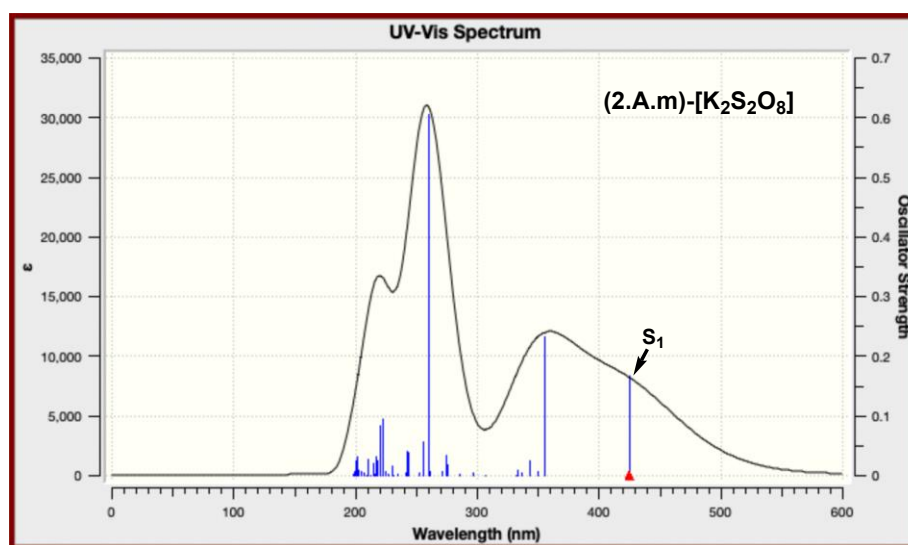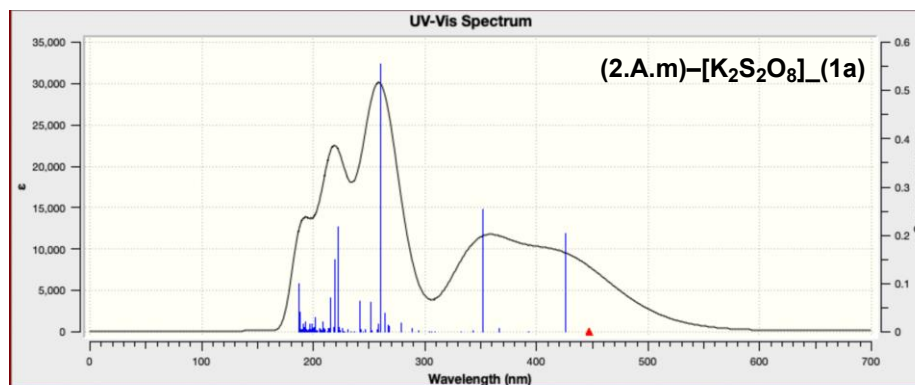

**Figure S9.** The calculated UV-vis spectra of isoalloxazine monoacetate, (2.A.m, isoalloxazine persulfate (2.A.m)-[K<sub>2</sub>S<sub>2</sub>O<sub>8</sub>], and {(2.A.m)-[K<sub>2</sub>S<sub>2</sub>O<sub>8</sub>]-{1a}} systems.

**Table S9.** Excitation energies (in eV and nm), oscillator strengths (f) for the isoalloxazine monoacetate-persulfate adduct, **{(2.A.m)-[K<sub>2</sub>S<sub>2</sub>O<sub>8</sub>]-1a}**, and associated frontier molecular orbitals.

Excited State 1: Singlet-A 2.7723 eV 447.23 nm f=0.0032 (dark)  
HOMO -> LUMO 0.70640

**Excited State 2: Singlet-A 2.9117 eV 425.81 nm f=0.2049 (bright)**  
**HOMO-3 -> LUMO 0.13122**  
**HOMO-1 -> LUMO 0.68961**

Excited State 3: Singlet-A 3.1542 eV 393.08 nm f=0.0002 (dark)  
HOMO-2 -> LUMO 0.70468

Excited State 4: Singlet-A 3.3778 eV 367.06 nm f=0.0065 (dark)  
HOMO-8 -> LUMO 0.45939  
HOMO-6 -> LUMO -0.23666  
HOMO-5 -> LUMO 0.45320

**Excited State 5: Singlet-A 3.5251 eV 351.72 nm f=0.2539 (bright)**  
**HOMO-3 -> LUMO 0.66806**  
**HOMO-1 -> LUMO -0.11662**  
**HOMO-1 -> LUMO -0.12354**

-----MOs-----  
LUMO+1 energy = -0.045754 a.u.

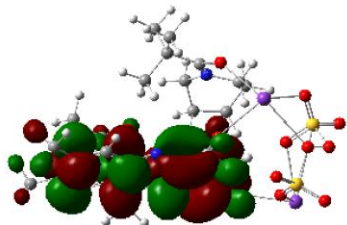

LUMO -0.112529 a.u.

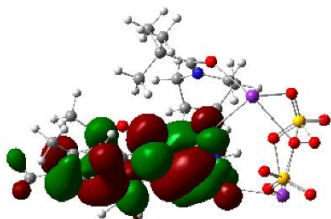

HOMO -0.234451 a.u.

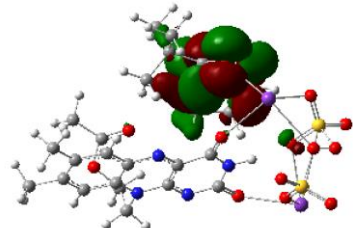

HOMO-1 -0.235775 au.u

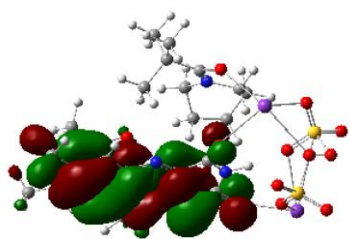

HOMO-2 -0.248124

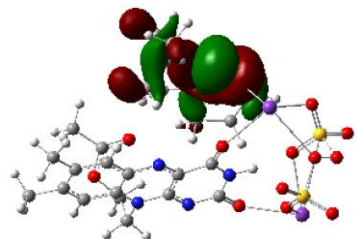

HOMO-3 -0.261656

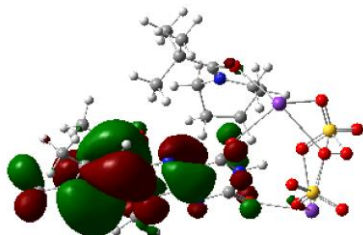

To validate that  $\text{K}_2\text{S}_2\text{O}_8$  is not the photocatalyst under blue light irradiation, we have calculated the several lower-lying excited states of  $\text{K}_2\text{S}_2\text{O}_8$  at the TD-DFT level. These calculations (see Figure S10) show that the first feasible excited transition of its UV-Vis spectra is the  $S_0/S_4$  transition at 201.1 nm with a transition dipole of  $f = 0.0102$ . This is the HOMO-3  $\rightarrow$  LUMO transition, where the LUMO is the antibonding orbital of the peroxy O-O bond. Indeed, at 450 nm irradiation, flavin catalysis should lead to substrate oxidation rather than the persulfate homolysis.

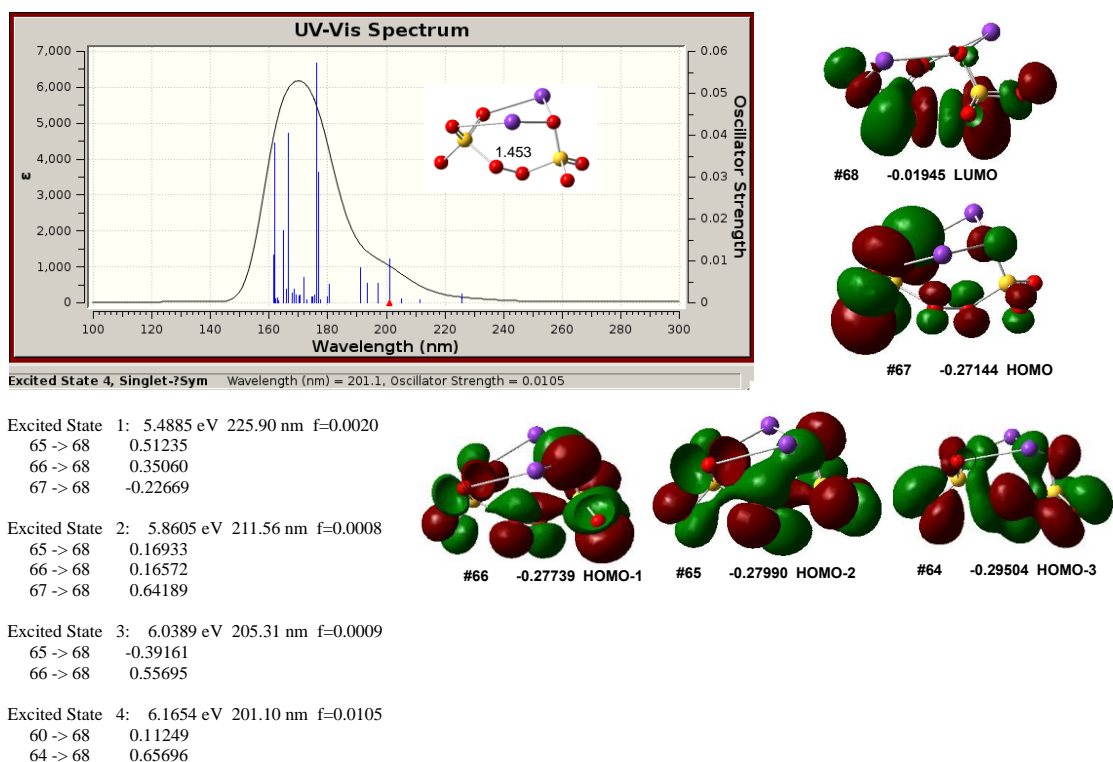

**Figure S10.** The calculated UV-Vis spectrum of the  $K_2S_2O_8$  oxidant and associated frontier molecular orbitals with their energies (in a.u.). Here, we also show the character of the first four transitions as well as their energies and dipole moments (f).

### 3.4 Computed Reaction Mechanism for Photo-Mediated Reaction

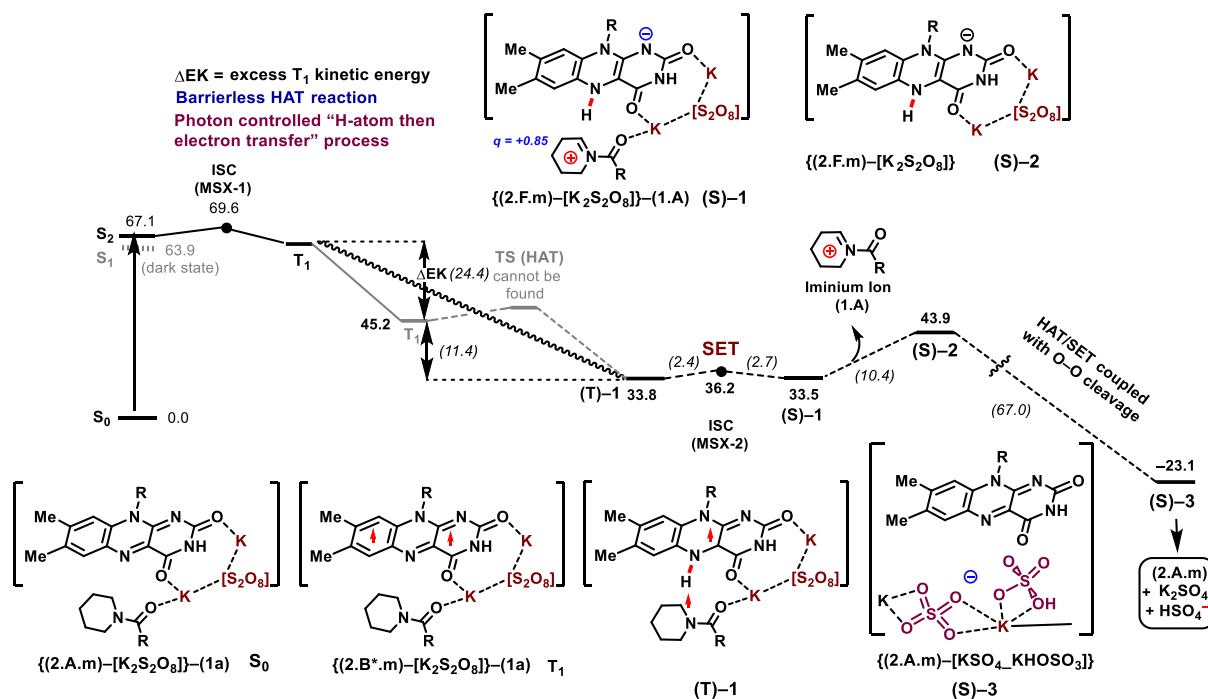

**Figure S11.** Computed reaction mechanism for the photocatalytic transformation of *N*-Piv-piperidine (**1a**) to iminium ion **1.A** by the reaction of riboflavin monoacetate (**2.A.m**), **1a**, and K<sub>2</sub>S<sub>2</sub>O<sub>8</sub>. All energies are listed in kcal/mol, and energy differences are shown in parentheses. Here, the energies given for the reaction T<sub>1</sub> → [(**S**)-**3**] are Gibbs free energies (calculated relative to the T<sub>1</sub> state), except the energy of the **MSX-2** which is an electronic energy (E) calculated relative to that of the (**T**)-**1** intermediate. The presented energies for the S<sub>0</sub> → T<sub>1</sub> are electronic energies, calculated relative to the S<sub>0</sub> state.

The processes leading to the formation of iminium ion and (**S**)-**2** intermediate were presented in main text. From the byproduct (**S**)-**2** (i.e.,{(2.F.m)-[K<sub>2</sub>S<sub>2</sub>O<sub>8</sub>]})}, the reaction undergoes *SET*, *HAT*, and *O–O homolysis* to form the singlet state complex {(2.A.m)-[K<sub>2</sub>SO<sub>4</sub>]-[HOSO<sub>3</sub><sup>-</sup>]}, (**S**)-**3**. This process may proceed in a stepwise or concerted fashion. The conversion (**S**)-**2** → (**S**)-**3** is calculated to be highly exergonic (by 77.4 kcal/mol). Because of the multi-component nature of this reaction, we failed to locate the associated transition state(s). However, we have established that the first step of this multi-step process is a SET from the fully reduced isoalloxazine-acetate, (**2.F.m**), to the potassium-persulfate.

### 3.5 Optimized Structure Energy Components for Photo-Mediated Reaction

**Table S10.** Calculated total electronic (E<sub>tot</sub>), E<sub>tot</sub> with zero-point energy corrections (E<sub>tot</sub> + ZPEC), enthalpy (H), and Gibbs free energies (in Hartrees; all values are negative) of all reported structures for the reaction of the isoalloxazine-acetate, potassium persulfate, and *N*-Piv-piperidine (**1a**)

| Str                                                                                | -E <sub>tot</sub> | -E <sub>tot</sub> + ZPEC | -H          | -G          |
|------------------------------------------------------------------------------------|-------------------|--------------------------|-------------|-------------|
| (2.A.m)_sing                                                                       | 1139.423323       | 1139.110825              | 1139.088549 | 1139.16196  |
| (2.A.m)_trip                                                                       | 1139.351508       | 1139.042038              | 1139.019378 | 1139.094658 |
| (2.A.m)_1min                                                                       | 1139.540237       | 1139.230171              | 1139.20776  | 1139.281876 |
| (2.A.m)_1plus                                                                      | 1139.200118       | 1138.88866               | 1138.866161 | 1138.940735 |
| K <sub>2</sub> S <sub>2</sub> O <sub>8</sub>                                       | 2598.037921       | 2598.003612              | 2597.988744 | 2598.048963 |
| K <sub>2</sub> SO <sub>4</sub>                                                     | 1899.058273       | 1899.041357              | 1899.032089 | 1899.078054 |
| (2.A.t), sing                                                                      | 1406.636299       | 1406.253586              | 1406.225075 | 1406.31546  |
| (2.A.th), sing                                                                     | 1673.850366       | 1673.396492              | 1673.362321 | 1673.465634 |
| (2.A.f), sing                                                                      | 1941.066384       | 1940.541517              | 1940.501644 | 1940.618886 |
| <b>1a</b> , singlet                                                                | 522.575576        | 522.29325                | 522.279314  | 522.331989  |
| <b>1a</b> , triplet                                                                | 522.4478571       | 522.169834               | 522.155278  | 522.211105  |
| <b>1a</b> _1plus                                                                   | 522.3498876       | 522.069779               | 522.055457  | 522.110236  |
| <b>1a</b> _1minus                                                                  | 522.5861193       | 522.309523               | 522.295276  | 522.349493  |
| <b>1.A</b>                                                                         | 521.7908303       | 521.52002                | 521.506158  | 521.558656  |
| (2.A.m)_ K <sub>2</sub> S <sub>2</sub> O <sub>8</sub> S <sub>0</sub> '             | 3737.498766       | 3737.150155              | 3737.112509 | 3737.2236   |
| (2.B*.m)_ K <sub>2</sub> S <sub>2</sub> O <sub>8</sub> , T <sub>1</sub> '          | 3737.426034       | 3737.080619              | 3737.042464 | 3737.156538 |
| (2.A.m)_ K <sub>2</sub> S <sub>2</sub> O <sub>8</sub> - <b>1a</b> , T <sub>1</sub> | 4260.038301       | 4259.408437              | 4259.355687 | 4259.49964  |
| sing                                                                               | 4260.100542       | 4259.467873              | 4259.415338 | 4259.558948 |
| [2.C.m]_ K <sub>2</sub> S <sub>2</sub> O <sub>8</sub> _1min, doub                  | 3737.618466       | 3737.272547              | 3737.234512 | 3737.348769 |
| quartet                                                                            | 3737.489247       | 3737.148696              | 3737.109624 | 3737.224997 |
| ( <b>T</b> )- <b>1</b>                                                             | 4260.055298       | 4259.42552               | 4259.372532 | 4259.517803 |
| ( <b>S</b> )- <b>1</b>                                                             | 4260.060305       | 4259.428837              | 4259.376186 | 4259.518369 |
| [2.F.m]_ K <sub>2</sub> S <sub>2</sub> O <sub>8</sub> _1min                        |                   |                          |             |             |
| Singlet                                                                            | 3738.225214       | 3737.867193              | 3737.828621 | 3737.943193 |
| Triplet                                                                            | 3738.150189       | 3737.795498              | 3737.756296 | 3737.873933 |
| [2.A.m]_HOSO <sub>3</sub> _K <sub>2</sub> SO <sub>4</sub> _1min                    |                   |                          |             |             |
|                                                                                    | 3738.352924       | 3737.993242              | 3737.955312 | 3738.066452 |

### 3.6 Optimized Structures and Energy Components for Copper-Mediated Reaction

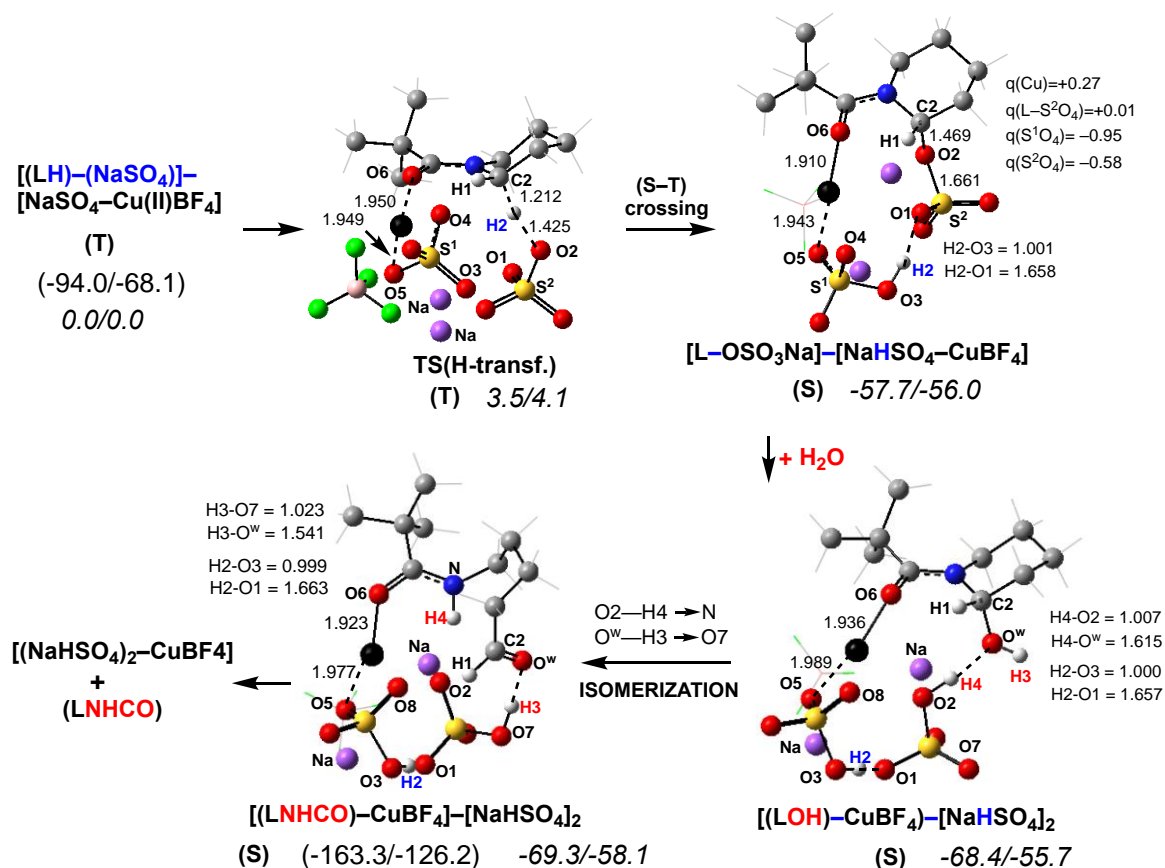

**Figure S12.** Computed relevant intermediates along with their geometry parameters (in Å) and relative energies (in kcal/mol) for the reaction of  $\text{CuBF}_4$ , N-Piv-piperidine (**1a** or **LH**) and sodium persulfate ( $\text{Na}_2\text{S}_2\text{O}_8$ ).

**Table S11.** Calculated total electronic ( $E_{\text{tot}}$ ),  $E_{\text{tot}}$  with zero-point energy corrections ( $E_{\text{tot}} + \text{ZPEC}$ ), enthalpy (H), and Gibbs free energies (in Hartrees; all values are negative) of all reported structures for the reaction of  $\text{CuBF}_4$ , sodium-persulfate, and N-Piv-piperidine **1a**.

| Str                                                           | $-E_{\text{tot}}$ | $-(E_{\text{tot}} + \text{ZPEC})$ | $-H$        | $-G$        |
|---------------------------------------------------------------|-------------------|-----------------------------------|-------------|-------------|
| $\text{SO}_4_{\text{min}}$                                    | 699.1222694       | 699.108177                        | 699.102801  | 699.13656   |
| $\text{HOSO}_3$ , 1min                                        | 699.7899769       | 699.76346                         | 699.757571  | 699.791896  |
| $\text{H}_2\text{O}$                                          | 76.4257436        | 76.40442                          | 76.400641   | 76.422735   |
| $\text{H}_2\text{SO}_4$                                       | 700.228991        | 700.190672                        | 700.184452  | 700.219072  |
| $\text{Na}_2\text{SO}_4$                                      | 1023.859253       | 1023.84169                        | 1023.832966 | 1023.875261 |
| LH, chair                                                     | 522.575576        | 522.29325                         | 522.279314  | 522.331989  |
| $\text{CuBF}_4$                                               | 620.6138319       | 620.598672                        | 620.591333  | 620.630662  |
| $\text{Na}_2\text{S}_2\text{O}_8$                             | 1722.821866       | 1722.786712                       | 1722.772502 | 1722.828513 |
| $\text{LH}_{\text{CuBF}_4}$                                   | 1143.251625       | 1142.951678                       | 1142.92987  | 1143.004439 |
| $\text{Na}_2\text{S}_2\text{O}_8_{\text{CuBF}_4}$             | 2343.502843       | 2343.451628                       | 2343.429223 | 2343.505589 |
| $[(\text{LH})-(\text{NaSO}_4)]-[\text{NaSO}_4-\text{CuBF}_4]$ |                   |                                   |             |             |

|                                                                  |             |             |             |             |
|------------------------------------------------------------------|-------------|-------------|-------------|-------------|
| triplet                                                          | 2866.165074 | 2865.829466 | 2865.792933 | 2865.899653 |
| singlet                                                          | 2866.134761 | 2865.798742 | 2865.761898 | 2865.871906 |
| TS(H-transf)                                                     | 2866.152814 | 2865.823397 | 2865.787345 | 2865.893068 |
| [L-OSO <sub>3</sub> Na]-[NaHSO <sub>4</sub> -CuBF <sub>4</sub> ] |             |             |             |             |
| singlet                                                          | 2866.259207 | 2865.920586 | 2865.884829 | 2865.988907 |
| [(LOH)-CuBF <sub>4</sub> ]-NaHSO <sub>4</sub> ] <sub>2</sub>     |             |             |             |             |
|                                                                  | 2942.705094 | 2942.340241 | 2942.302495 | 2942.411233 |
| [(LNHCO)-CuBF <sub>4</sub> ]-[NaHSO <sub>4</sub> ] <sub>2</sub>  |             |             |             |             |
| singlet                                                          | 2942.703819 | 2942.342931 | 2942.303953 | 2942.415055 |
| LNHCO                                                            | 597.8048282 | 597.521264  | 597.50508   | 597.563274  |
| [(NaHSO <sub>4</sub> ) <sub>2</sub> -CuBF <sub>4</sub> ]         |             |             |             |             |
|                                                                  | 2344.846166 | 2344.771362 | 2344.748954 | 2344.824479 |

### 3.7 General Computational Considerations for Computations in Figure 13

All calculations were conducted using DFT<sup>27</sup> implemented in the Gaussian 09 suite<sup>28</sup> of ab initio quantum chemistry programs with Becke's three-parameter exchange functional B3LYP including Grimme's D3 dispersion correction with Becke-Johnson damping levels of theory.<sup>13,14,16,29-32</sup> Geometry optimizations were conducted using Pople's 6-31G(d,p) basis set for main group elements.<sup>33-38</sup> Copper was modeled using the Los Alamos ECP plus DZ basis (LANL2DZ) that includes relativistic effective core potentials.<sup>10</sup> The energies of the optimized structures were reevaluated by additional single-point calculations on each optimized geometry using the same functional and Pople's 6-311++G(d,p) basis set.<sup>39-42</sup> Copper was remodeled for single-point calculations using Stuttgart group effective core potential SDD.<sup>43</sup> Solvation effects were adopted at the same level of single-point calculations and at the self-consistent reaction field polarizable continuum model (IEF-PCM) with a dielectric constant of 78.3553 for water.<sup>44</sup> The Gibbs free energies were computed with the following equations.

$$G(\text{sol}) = \epsilon(\text{sol}) + G(\text{corr}) \quad (1)$$

$$G(\text{corr}) = H(\text{corr}) - TS(\text{tot}) \quad (2)$$

$$H(\text{corr}) = E(\text{tot}) + k_B T \quad (3)$$

$$E(\text{tot}) = E(\text{t}) + E(\text{r}) + E(\text{v}) + E(\text{e}) \quad (4)$$

$$S(\text{tot}) = S(\text{t}) + S(\text{r}) + S(\text{v}) + S(\text{e}) \quad (5)$$

$$\Delta E(\text{SCF}) = \sum E(\text{SCF}) \text{ for products} - \sum E(\text{SCF}) \text{ for reactants} \quad (6)$$

$$\Delta G(\text{sol}) = \sum G(\text{sol}) \text{ for products} - \sum G(\text{sol}) \text{ for reactants} \quad (7)$$

$E(\text{sol})$  is the electronic energy in solution phase computed from the SCF (self-consistent field) procedure with the IEF-PCM calculations;  $G(\text{sol})$  is the free energy in solution phase;  $G(\text{corr})$  is the thermal correction to the free energy;  $T$  is the temperature (298.15 K);  $S(\text{tot})$  is the entropy;  $E(\text{tot})$  is the total internal thermal energy;  $E(\text{t})$ ,  $E(\text{r})$ ,  $E(\text{v})$ , and  $E(\text{e})$  are the internal thermal energies from translation, rotation, vibration, and electronic motions, respectively;  $S(\text{t})$ ,  $S(\text{r})$ ,  $S(\text{v})$ , and  $S(\text{e})$  are the entropies from translation, rotation, vibration, and electronic motions, respectively; The entropy we refer to is specifically of the solute(s), and the entropy of the solvent is implicitly comprised in the continuum solvation model.

### 3.8 Reaction Rate Comparison Between **11-TS** and **11-TS'**.

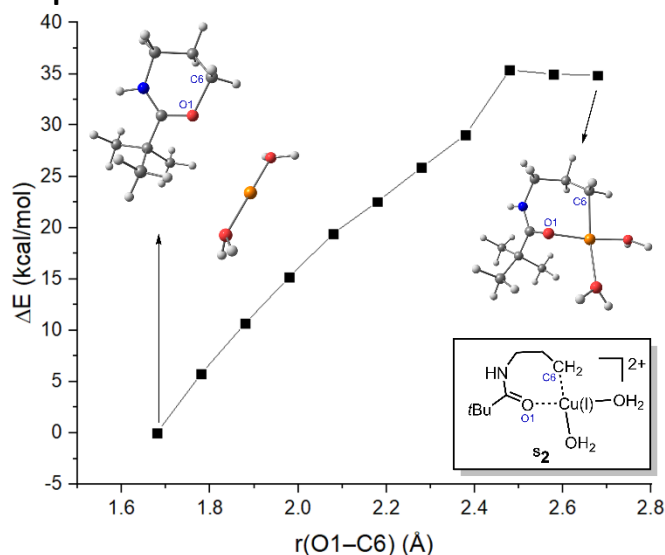

**Figure S13.** Electronic energy surface plot for the cyclization of **11** toward dihydro-oxazine (**10m**) with respect to the O1–C6 distance.

To investigate the reaction rate for the cyclization of **11** toward the cyclized product, dihydro-oxazine (**10m**), we have conducted a potential energy surface scan from **11** to **10m** with respect to the O1–C6 bond length as shown in Figure S13. However, despite our efforts with various methods, the transition state calculations for the cyclization did not converge. Instead, we assumed that the transition might require free energy of about 0.5 kcal/mol, which is the electronic energy difference between two points at  $r(\text{O1-C6}) = 2.68 \text{ \AA}$  (**11**) and at  $r(\text{O1-C6}) = 2.48 \text{ \AA}$  (**11-TS** in Figure S13). Because of this uncertainty, we denoted the  $\Delta G(\text{sol})$  for **11-TS** as  $\sim -0.8$  in Figure S13.

More significant is the relative reaction rate for the cyclization as compared to the rate of deprotonation. On the basis of transition state theory, the equilibrium constant for the quasi-equilibrium,  $K^\ddagger$ , can be written as,

$$K^\ddagger = \exp(-\Delta G^\ddagger/RT)$$

The ratio  $[\mathbf{11-TS}]/[\mathbf{11}]$  is then estimated to be  $\exp(-(-0.5 \times 4182 \text{ J}) / (8.3145 \text{ J} \cdot \text{K}^{-1} \times 298.15 \text{ K})) \cong 0.43$ . Whereas, for the deprotonation, the ratio  $[\mathbf{11-TS}']/[\mathbf{11}]$  is calculated to be  $[\text{H}_2\text{O}] \times \exp(-(-9.73 \times 4182 \text{ J}) / (8.3145 \text{ J} \cdot \text{K}^{-1} \times 298.15 \text{ K})) \cong 4.13 \times 10^{-6}$ , where  $[\text{H}_2\text{O}] = 55.6$ . The rate constant  $k^\ddagger$  for the bimolecular reaction is known to be generally much lower than that of the unimolecular reaction, we posit that the cyclization of **11** is at least  $10^5$  times faster than the deprotonation.



### 3.9 Energy Components for Optimized Structures in Figure 13

**Table S12.** Computed energy components for optimized structures.

|                                        | <b>E(sol)(SCF)/(Hartree)</b>   | <b>Thermal Correction to G/(Hartree)</b> |
|----------------------------------------|--------------------------------|------------------------------------------|
|                                        | B3LYP-D3<br>/6-311++G(d,p)/SDD | B3LYP-D3<br>/6-31G(d,p)/LANL2DZ          |
| <b>Cu'(H<sub>2</sub>O)<sub>2</sub></b> | -350.17225                     | 0.01968                                  |
| <b>H<sub>2</sub>O</b>                  | -76.26704                      | 0.00371                                  |
| <b>H<sub>3</sub>O<sup>+</sup></b>      | -76.85586                      | 0.01528                                  |
| <b>CO</b>                              | -113.35032                     | -0.01411                                 |
| <b>11</b>                              | -794.62020                     | 0.23612                                  |
| <b>11-TS'</b>                          | -871.08488                     | 0.25297                                  |
| <b>12</b>                              | -794.25191                     | 0.22776                                  |
| <b>olefin</b>                          | -444.04010                     | 0.18358                                  |
| <b>10m</b>                             | -444.48969                     | 0.20236                                  |

## 4. X-ray Crystallographic Data

### 4.1 X-ray Analysis of 10m

A colorless block 0.12 x 0.08 x 0.05 mm in size was mounted on a Cryoloop with Paratone oil. Data were collected in a nitrogen gas stream at 100(2) K using omega scans. Crystal-to-detector distance was 30.23 mm and exposure time was 0.50 seconds per frame at low and 2.00 seconds at high angles, using a scan width of 0.5°. Data collection was 100% complete to 74.000° in  $\theta$ . A total of 61459 reflections were collected covering the indices  $-21 \leq h \leq 21$ ,  $-21 \leq k \leq 21$ ,  $-8 \leq l \leq 8$ . 1204 reflections were found to be symmetry independent, with an  $R_{\text{int}}$  of 0.0652. Indexing and unit cell refinement indicated a primitive, tetragonal lattice. The space group was found to be  $P 4_2/m b c$  (No. 135). The data were integrated using the CrysAlis<sup>Pro</sup> 1.171.40.68a software program and scaled using the SCALE3 ABSPACK scaling algorithm. Solution by intrinsic phasing (SHELXT-2015) produced a heavy-atom phasing model consistent with the proposed structure. All non-hydrogen atoms were refined anisotropically by full-matrix least-squares (SHELXL-2014). All hydrogen atoms were placed using a riding model. Their positions were constrained relative to their parent atom using the appropriate HFIX command in SHELXL-2014.

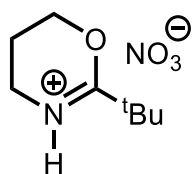

**10m**

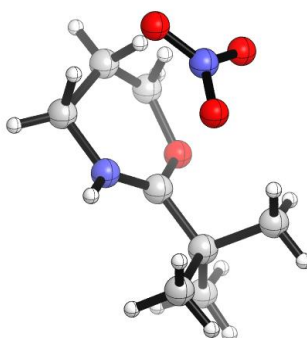

This crystal structure has been deposited at the Cambridge Crystallographic Data Center under CCDC 2128702.

**Table S13.** Crystal data and structure refinement for JRoque\_David.

|                                 |                                                                  |                  |
|---------------------------------|------------------------------------------------------------------|------------------|
| Identification code             | JRoque_David                                                     |                  |
| Empirical formula               | C8 H16 N2 O4                                                     |                  |
| Formula weight                  | 204.23                                                           |                  |
| Temperature                     | 150(2) K                                                         |                  |
| Wavelength                      | 1.54184 Å                                                        |                  |
| Crystal system                  | Tetragonal                                                       |                  |
| Space group                     | $P 4_2/m b c$                                                    |                  |
| Unit cell dimensions            | $a = 17.20020(10)$ Å                                             | $a = 90^\circ$ . |
|                                 | $b = 17.20020(10)$ Å                                             | $b = 90^\circ$ . |
|                                 | $c = 6.94210(10)$ Å                                              | $g = 90^\circ$ . |
| Volume                          | $2053.80(4)$ Å <sup>3</sup>                                      |                  |
| Z                               | 8                                                                |                  |
| Density (calculated)            | 1.321 Mg/m <sup>3</sup>                                          |                  |
| Absorption coefficient          | 0.893 mm <sup>-1</sup>                                           |                  |
| F(000)                          | 880                                                              |                  |
| Crystal size                    | 0.120 x 0.080 x 0.050 mm <sup>3</sup>                            |                  |
| Theta range for data collection | 3.634 to 79.180°.                                                |                  |
| Index ranges                    | $-21 \leq h \leq 21$ , $-21 \leq k \leq 21$ , $-8 \leq l \leq 8$ |                  |
| Reflections collected           | 61459                                                            |                  |

|                                   |                                             |
|-----------------------------------|---------------------------------------------|
| Independent reflections           | 1204 [R(int) = 0.0652]                      |
| Completeness to theta = 74.000°   | 99.8 %                                      |
| Absorption correction             | Semi-empirical from equivalents             |
| Max. and min. transmission        | 1.00000 and 0.55325                         |
| Refinement method                 | Full-matrix least-squares on F <sup>2</sup> |
| Data / restraints / parameters    | 1204 / 0 / 99                               |
| Goodness-of-fit on F <sup>2</sup> | 1.175                                       |
| Final R indices [I>2sigma(I)]     | R1 = 0.0598, wR2 = 0.1451                   |
| R indices (all data)              | R1 = 0.0608, wR2 = 0.1457                   |
| Extinction coefficient            | n/a                                         |
| Largest diff. peak and hole       | 0.278 and -0.359 e.Å <sup>-3</sup>          |

**Table S14.** Atomic coordinates ( x 10<sup>4</sup>) and equivalent isotropic displacement parameters (Å<sup>2</sup> x 10<sup>3</sup>) for jroque\_david. U(eq) is defined as one third of the trace of the orthogonalized U<sup>ij</sup> tensor.

|      | x       | y       | z        | U(eq) |
|------|---------|---------|----------|-------|
| O(1) | 7080(1) | 5330(1) | 5000     | 34(1) |
| N(1) | 8120(1) | 4507(1) | 5000     | 33(1) |
| N(2) | 8130(2) | 4606(1) | 0        | 43(1) |
| O(4) | 8791(1) | 4837(1) | 0        | 73(1) |
| O(2) | 8016(1) | 3891(1) | 0        | 87(1) |
| C(4) | 7382(1) | 4630(1) | 5000     | 28(1) |
| O(3) | 7588(2) | 5080(1) | 0        | 83(1) |
| C(7) | 8711(2) | 5137(2) | 5000     | 41(1) |
| C(2) | 6768(1) | 3996(2) | 5000     | 34(1) |
| C(1) | 7127(2) | 3191(2) | 5000     | 47(1) |
| C(3) | 6268(2) | 4101(1) | 3207(5)  | 67(1) |
| C(6) | 8324(2) | 5882(2) | 4215(6)  | 37(1) |
| C(5) | 7600(2) | 5995(2) | 5361(10) | 36(2) |

**Table S15.** Bond lengths [Å] and angles [°] for jroque\_david.

|             |          |
|-------------|----------|
| O(1)-C(4)   | 1.310(3) |
| O(1)-C(5)   | 1.474(4) |
| N(1)-C(4)   | 1.286(3) |
| N(1)-C(7)   | 1.485(3) |
| N(1)-H(1)   | 0.88(4)  |
| N(2)-O(4)   | 1.205(3) |
| N(2)-O(3)   | 1.239(3) |
| N(2)-O(2)   | 1.246(3) |
| C(4)-C(2)   | 1.518(3) |
| C(7)-C(6)   | 1.544(4) |
| C(7)-H(7A)  | 0.9900   |
| C(7)-H(7B)  | 0.9900   |
| C(2)-C(1)   | 1.517(4) |
| C(2)-C(3)   | 1.523(3) |
| C(2)-C(3)#1 | 1.523(3) |
| C(1)-H(1A)  | 0.99(3)  |
| C(1)-H(1B)  | 1.02(3)  |
| C(3)-H(3A)  | 0.9800   |
| C(3)-H(3B)  | 0.9800   |
| C(3)-H(3C)  | 0.9800   |
| C(6)-C(5)   | 1.490(6) |

|                  |            |
|------------------|------------|
| C(6)-H(6A)       | 0.9900     |
| C(6)-H(6B)       | 0.9900     |
| C(5)-H(5A)       | 0.9900     |
| C(5)-H(5B)       | 0.9900     |
|                  |            |
| C(4)-O(1)-C(5)   | 118.2(2)   |
| C(4)-N(1)-C(7)   | 123.7(2)   |
| C(4)-N(1)-H(1)   | 124(2)     |
| C(7)-N(1)-H(1)   | 112(2)     |
| O(4)-N(2)-O(3)   | 119.6(3)   |
| O(4)-N(2)-O(2)   | 118.3(3)   |
| O(3)-N(2)-O(2)   | 122.1(3)   |
| N(1)-C(4)-O(1)   | 122.8(2)   |
| N(1)-C(4)-C(2)   | 124.6(2)   |
| O(1)-C(4)-C(2)   | 112.5(2)   |
| N(1)-C(7)-C(6)   | 108.1(2)   |
| N(1)-C(7)-H(7A)  | 110.1      |
| C(6)-C(7)-H(7A)  | 110.1      |
| N(1)-C(7)-H(7B)  | 110.1      |
| C(6)-C(7)-H(7B)  | 110.1      |
| H(7A)-C(7)-H(7B) | 108.4      |
| C(1)-C(2)-C(4)   | 111.9(2)   |
| C(1)-C(2)-C(3)   | 109.71(16) |
| C(4)-C(2)-C(3)   | 107.95(15) |
| C(1)-C(2)-C(3)#1 | 109.71(16) |
| C(4)-C(2)-C(3)#1 | 107.95(15) |
| C(3)-C(2)-C(3)#1 | 109.6(3)   |
| C(2)-C(1)-H(1A)  | 107.1(19)  |
| C(2)-C(1)-H(1B)  | 110.9(13)  |
| H(1A)-C(1)-H(1B) | 109.4(16)  |
| C(2)-C(3)-H(3A)  | 109.5      |
| C(2)-C(3)-H(3B)  | 109.5      |
| H(3A)-C(3)-H(3B) | 109.5      |
| C(2)-C(3)-H(3C)  | 109.5      |
| H(3A)-C(3)-H(3C) | 109.5      |
| H(3B)-C(3)-H(3C) | 109.5      |
| C(5)-C(6)-C(7)   | 106.3(3)   |
| C(5)-C(6)-H(6A)  | 110.5      |
| C(7)-C(6)-H(6A)  | 110.5      |
| C(5)-C(6)-H(6B)  | 110.5      |
| C(7)-C(6)-H(6B)  | 110.5      |
| H(6A)-C(6)-H(6B) | 108.7      |
| O(1)-C(5)-C(6)   | 108.3(3)   |
| O(1)-C(5)-H(5A)  | 110.0      |
| C(6)-C(5)-H(5A)  | 110.0      |
| O(1)-C(5)-H(5B)  | 110.0      |
| C(6)-C(5)-H(5B)  | 110.0      |
| H(5A)-C(5)-H(5B) | 108.4      |

---

Symmetry transformations used to generate equivalent atoms:

#1 x,y,-z+1

**Table S16.** Anisotropic displacement parameters ( $\text{\AA}^2 \times 10^3$ ) for jroque\_david. The anisotropic displacement factor exponent takes the form:  $-2p^2 [ h^2 a^* U^{11} + \dots + 2 h k a^* b^* U^{12} ]$

|      | U <sup>11</sup> | U <sup>22</sup> | U <sup>33</sup> | U <sup>23</sup> | U <sup>13</sup> | U <sup>12</sup> |
|------|-----------------|-----------------|-----------------|-----------------|-----------------|-----------------|
| O(1) | 26(1)           | 21(1)           | 56(1)           | 0               | 0               | -2(1)           |
| N(1) | 25(1)           | 23(1)           | 51(1)           | 0               | 0               | -1(1)           |
| N(2) | 41(1)           | 26(1)           | 61(2)           | 0               | 0               | 6(1)            |
| O(4) | 39(1)           | 39(1)           | 143(3)          | 0               | 0               | -3(1)           |
| O(2) | 44(1)           | 26(1)           | 191(4)          | 0               | 0               | 4(1)            |
| C(4) | 26(1)           | 22(1)           | 37(1)           | 0               | 0               | -2(1)           |
| O(3) | 51(2)           | 36(1)           | 162(3)          | 0               | 0               | 18(1)           |
| C(7) | 24(1)           | 28(1)           | 71(2)           | 0               | 0               | -6(1)           |
| C(2) | 23(1)           | 23(1)           | 54(2)           | 0               | 0               | -4(1)           |
| C(1) | 31(1)           | 23(1)           | 87(3)           | 0               | 0               | -3(1)           |
| C(3) | 62(2)           | 42(1)           | 96(2)           | 11(1)           | -41(2)          | -18(1)          |
| C(6) | 35(2)           | 26(2)           | 49(2)           | 3(2)            | -2(2)           | -6(1)           |
| C(5) | 35(2)           | 21(1)           | 53(6)           | -3(2)           | 0(2)            | -7(1)           |

**Table S17.** Hydrogen coordinates ( $\times 10^4$ ) and isotropic displacement parameters ( $\text{\AA}^2 \times 10^3$ ) for jroque\_david.

|       | x        | y        | z        | U(eq)  |
|-------|----------|----------|----------|--------|
| H(7A) | 9157     | 4989     | 4176     | 49     |
| H(7B) | 8904     | 5226     | 6325     | 49     |
| H(3A) | 6001     | 4604     | 3268     | 100    |
| H(3B) | 5883     | 3682     | 3142     | 100    |
| H(3C) | 6599     | 4084     | 2059     | 100    |
| H(6A) | 8675     | 6334     | 4370     | 44     |
| H(6B) | 8198     | 5822     | 2831     | 44     |
| H(5A) | 7727     | 6027     | 6749     | 44     |
| H(5B) | 7341     | 6485     | 4975     | 44     |
| H(1A) | 6692(19) | 2813(19) | 5000     | 40(9)  |
| H(1B) | 7459(15) | 3108(13) | 3810(40) | 58(8)  |
| H(1)  | 8330(20) | 4050(20) | 5000     | 48(10) |

**Table S18.** Torsion angles [ $^\circ$ ] for jroque\_david.

|                       |             |
|-----------------------|-------------|
| C(7)-N(1)-C(4)-O(1)   | 0.0         |
| C(7)-N(1)-C(4)-C(2)   | 180.0       |
| C(5)-O(1)-C(4)-N(1)   | -11.1(3)    |
| C(5)-O(1)-C(4)-C(2)   | 168.9(3)    |
| C(4)-N(1)-C(7)-C(6)   | -21.79(18)  |
| N(1)-C(4)-C(2)-C(1)   | 0.0         |
| O(1)-C(4)-C(2)-C(1)   | 180.0       |
| N(1)-C(4)-C(2)-C(3)   | -120.80(18) |
| O(1)-C(4)-C(2)-C(3)   | 59.20(18)   |
| N(1)-C(4)-C(2)-C(3)#1 | 120.80(18)  |
| O(1)-C(4)-C(2)-C(3)#1 | -59.20(18)  |
| N(1)-C(7)-C(6)-C(5)   | 51.9(3)     |
| C(4)-O(1)-C(5)-C(6)   | 44.2(5)     |
| C(7)-C(6)-C(5)-O(1)   | -63.1(4)    |

---

Symmetry transformations used to generate equivalent atoms:

#1 x,y,-z+1

## 5. NMR Spectral Data

### Pivaloyl Protected Cyclic Amines

#### 2,2-dimethyl-1-(3-methylpiperidin-1-yl)propan-1-one

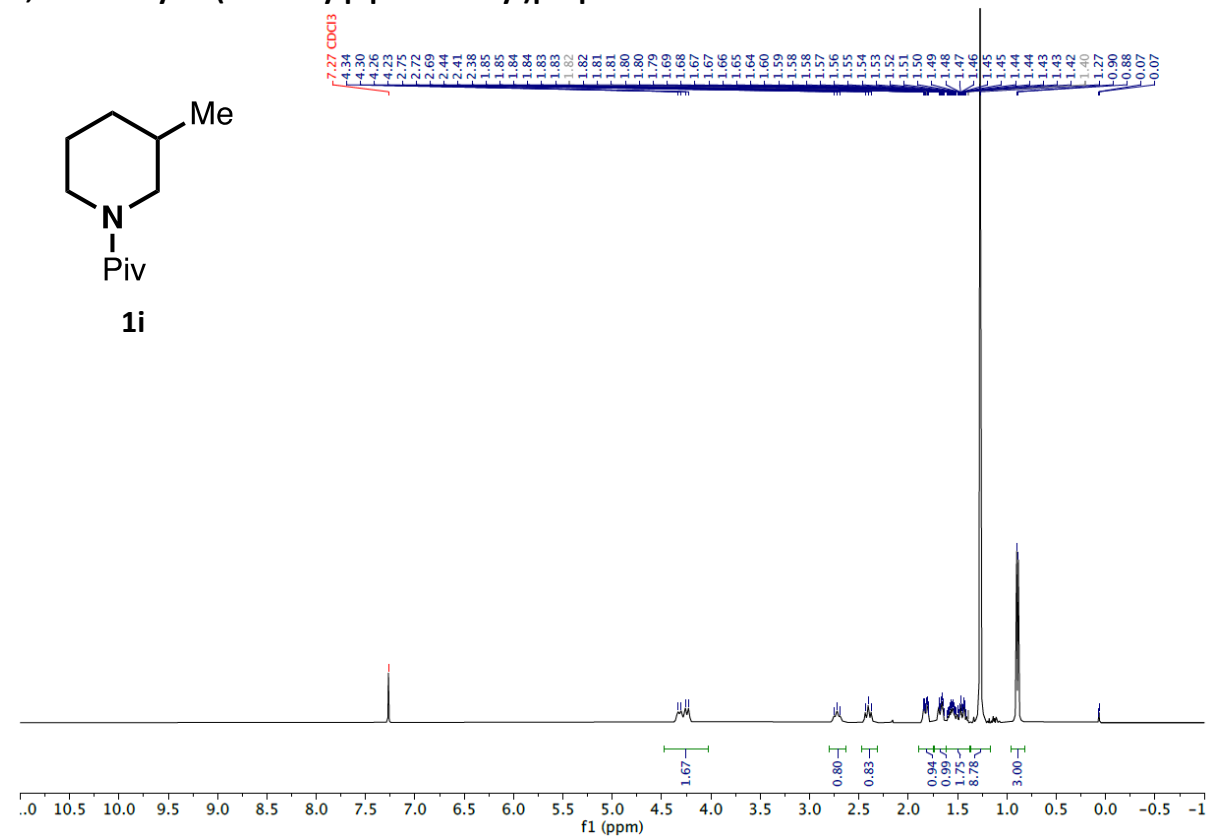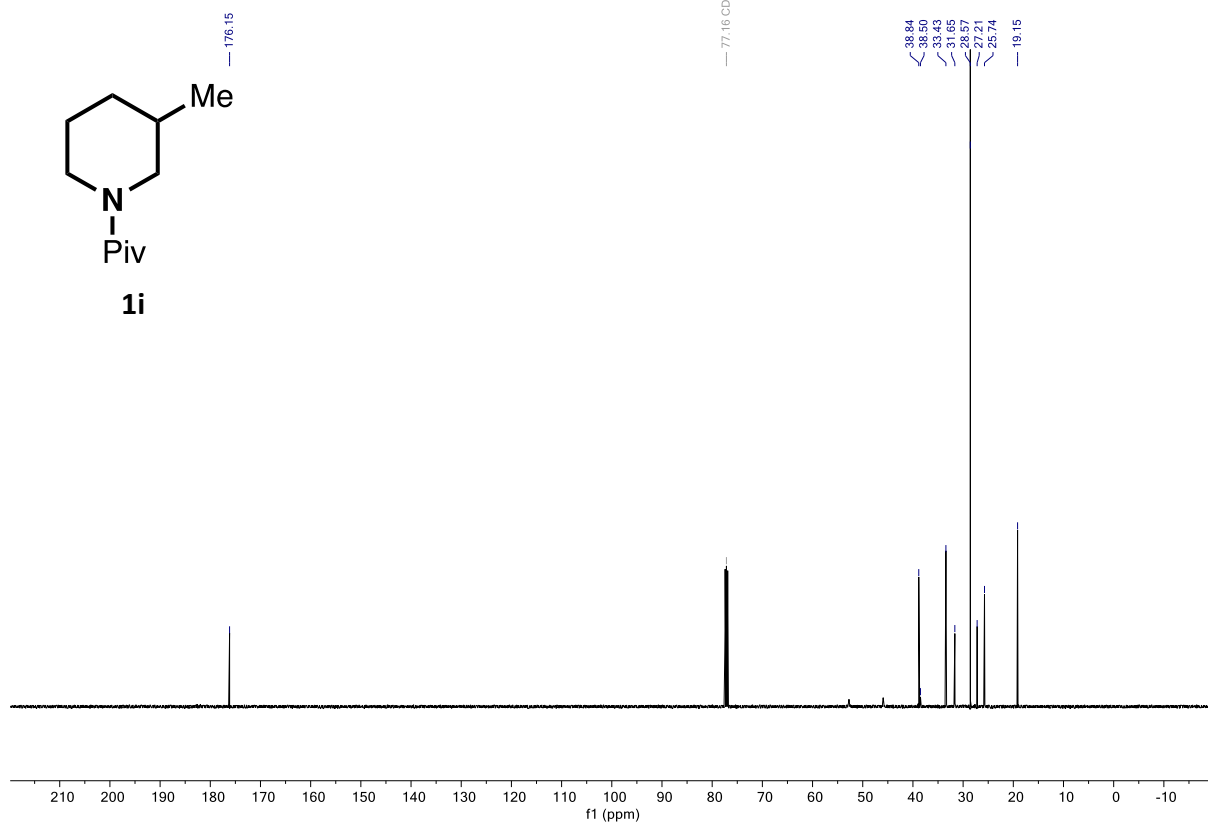

# 1-(2-ethylpiperidin-1-yl)-2,2-dimethylpropan-1-one

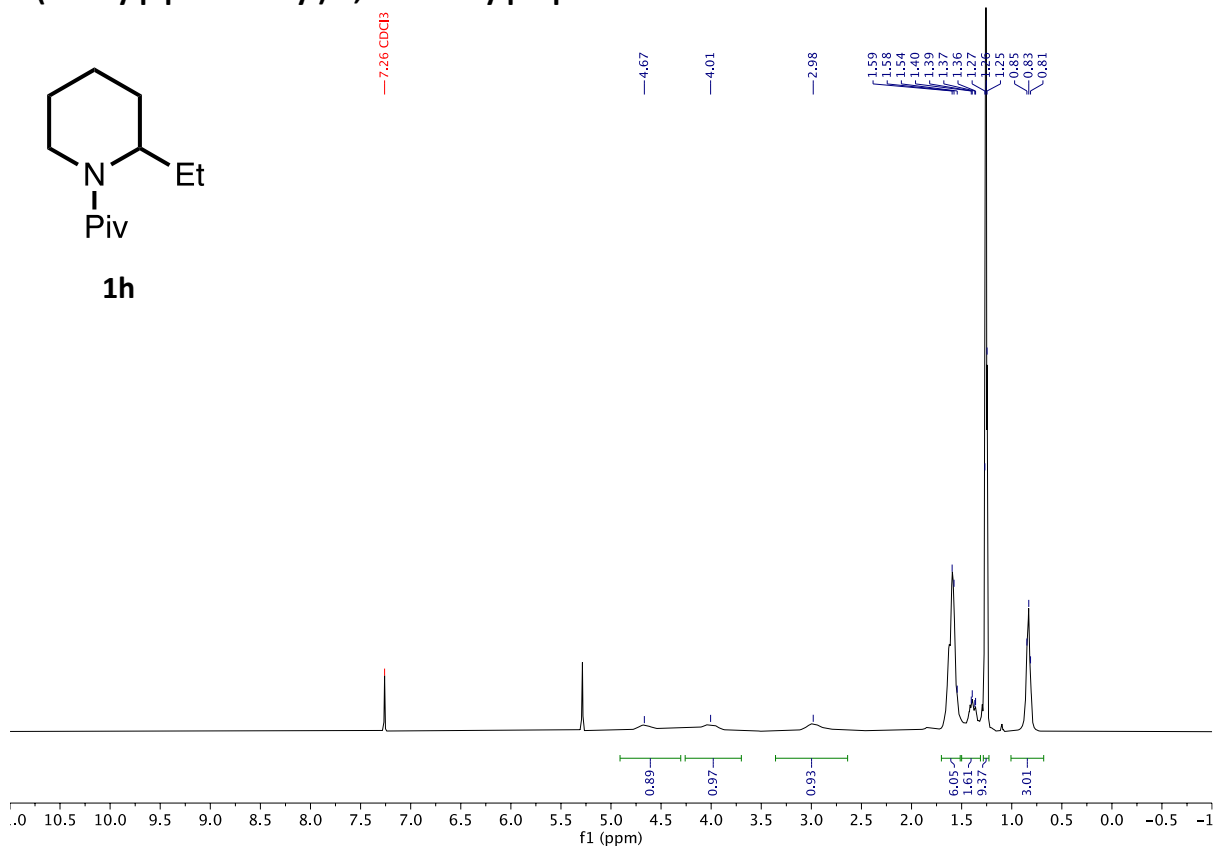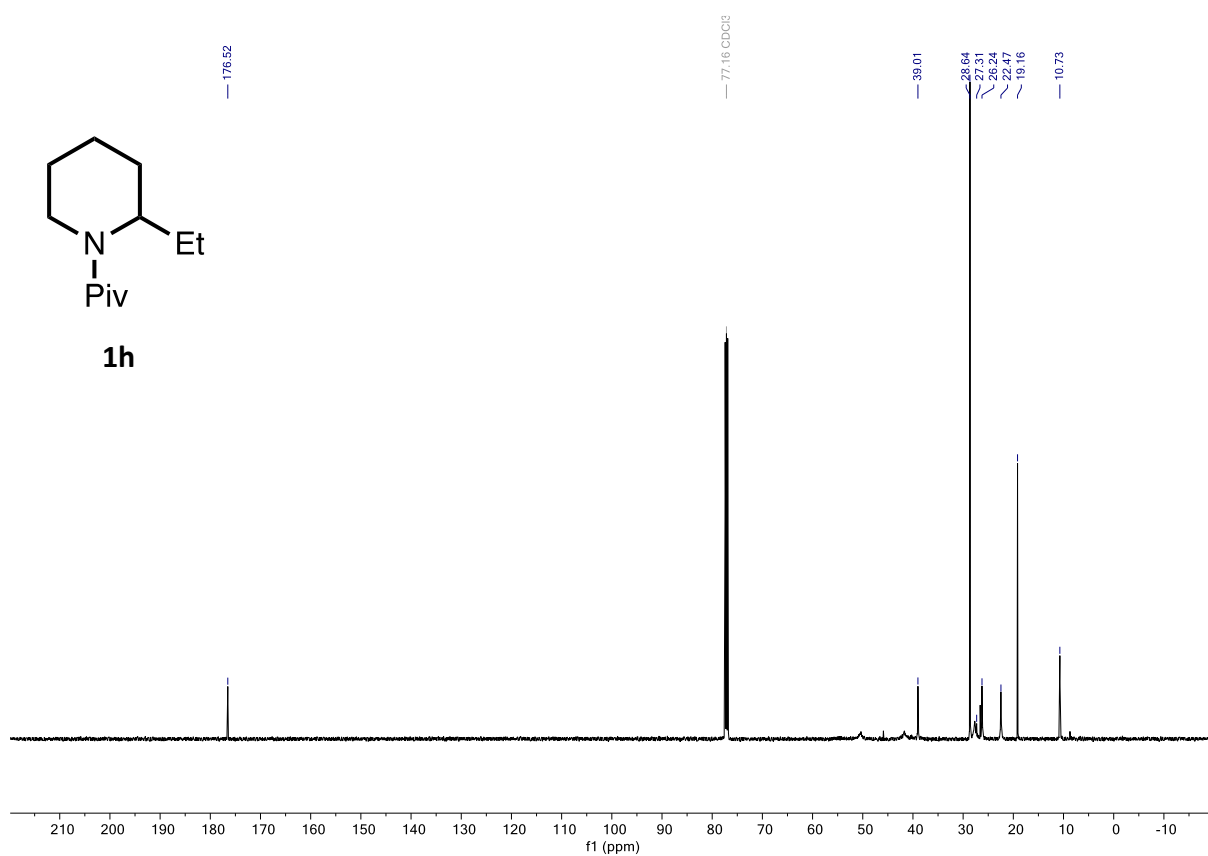



2,2-dimethyl-1-(3-phenylpiperidin-1-yl)propan-1-one

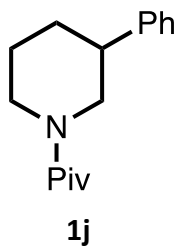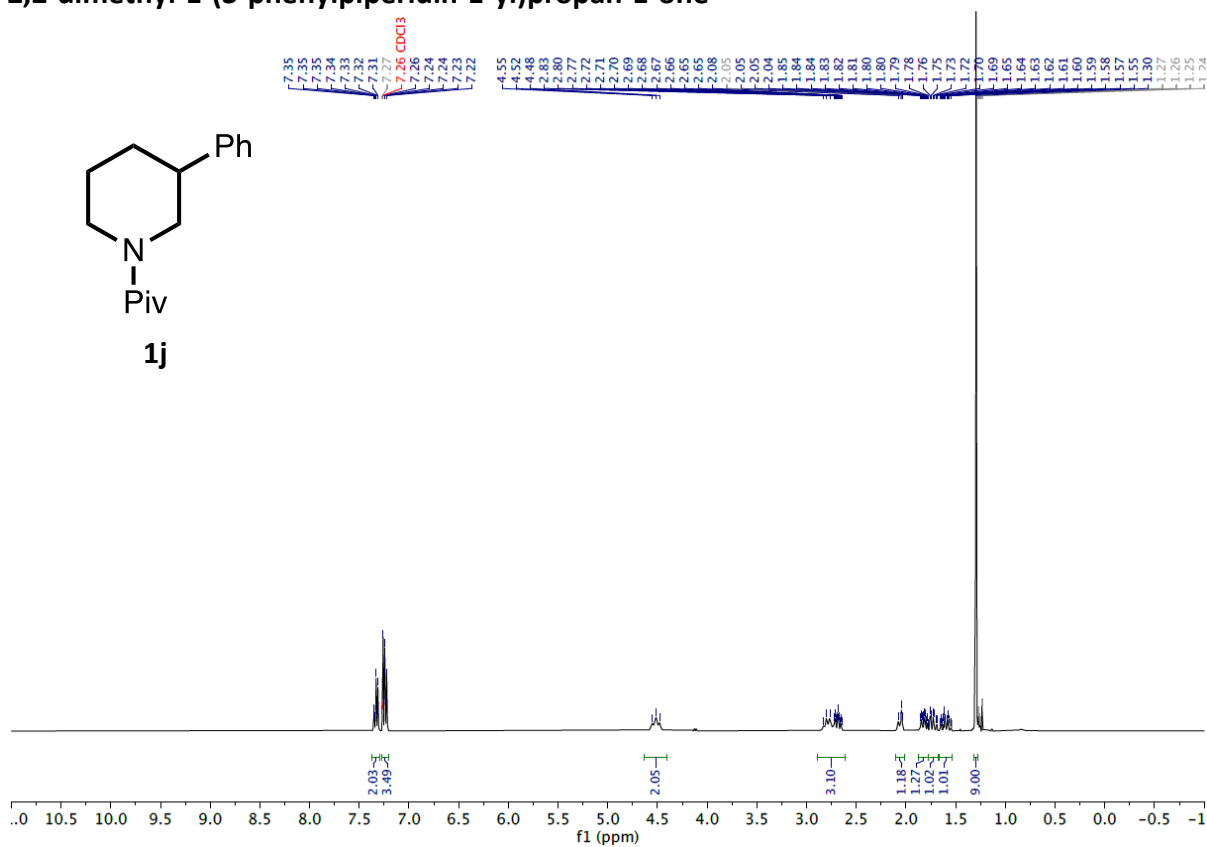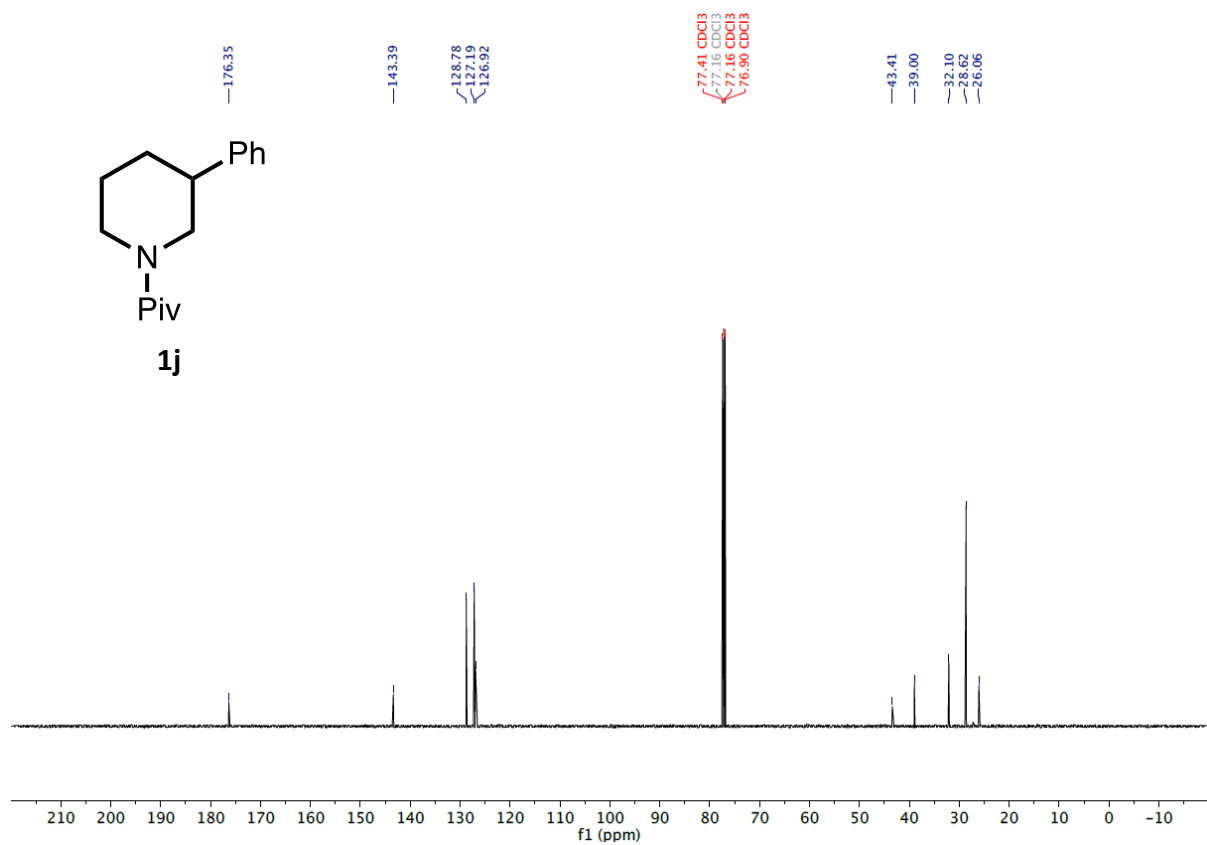

1-(4-(4-chlorophenyl)piperidin-1-yl)-2,2-dimethylpropan-1-one

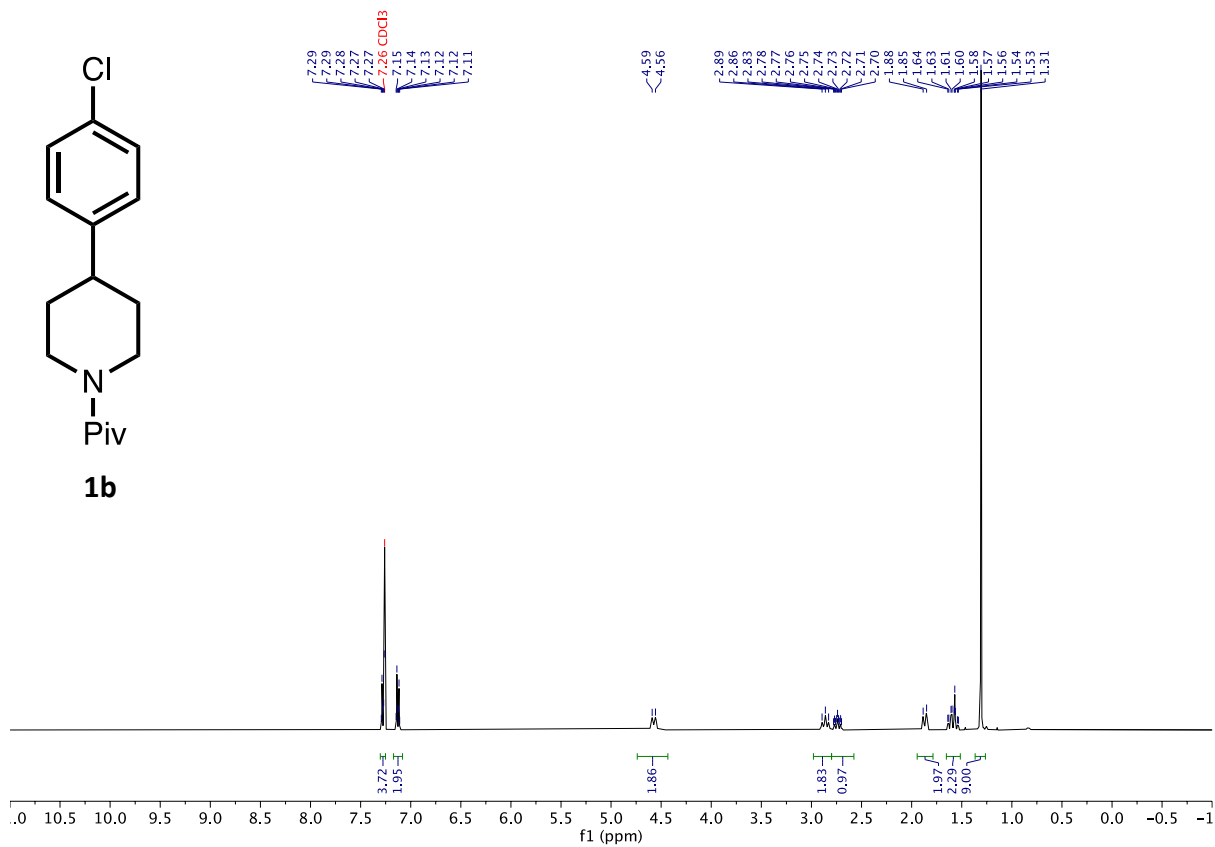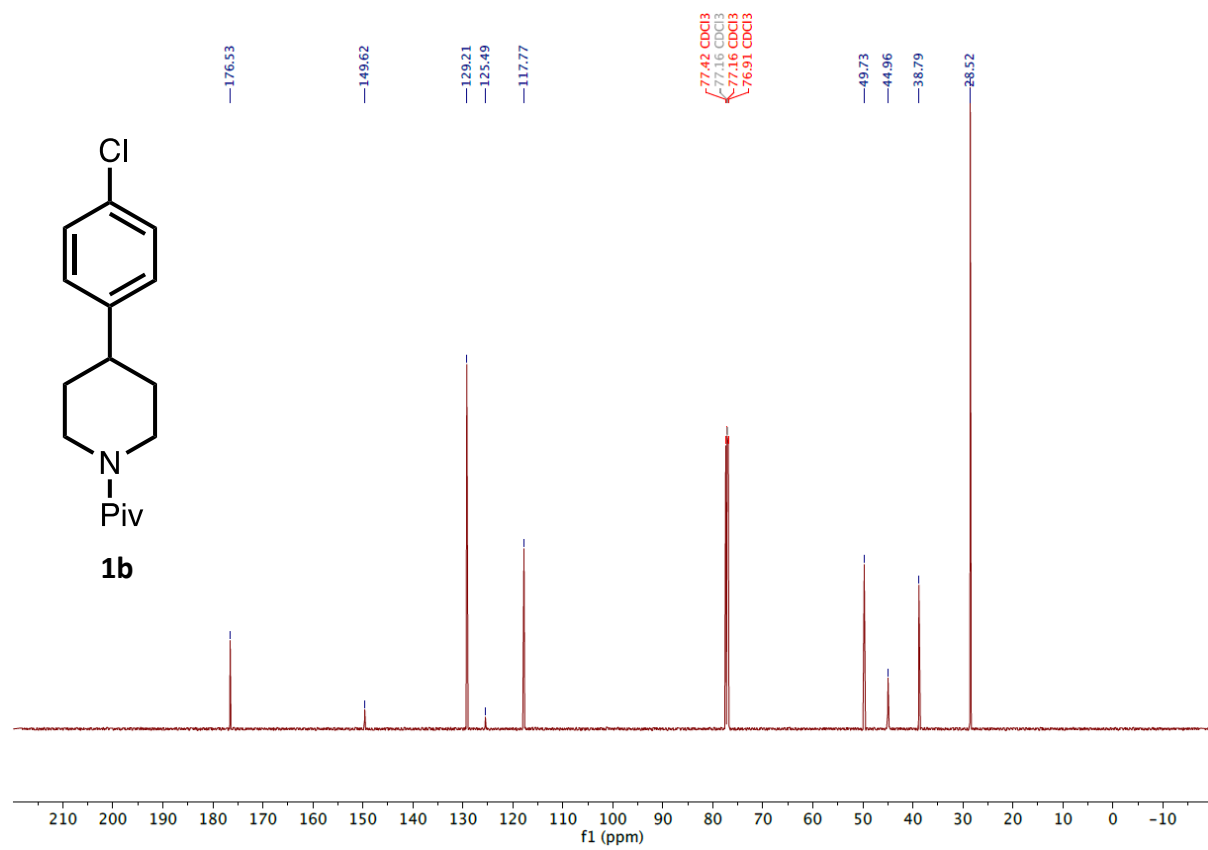

# 1-(6,7-dimethoxy-3,4-dihydroisoquinolin-2(1H)-yl)-2,2-dimethylpropan-1-one

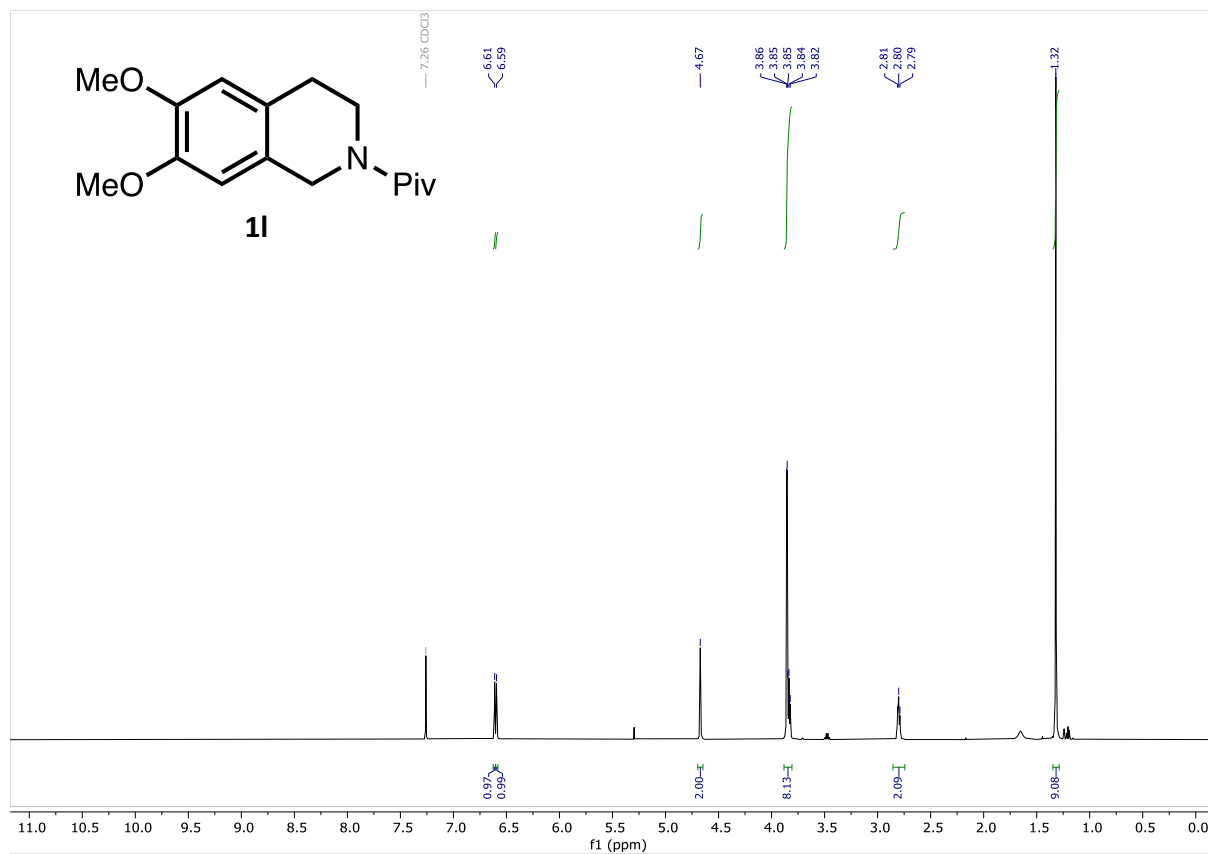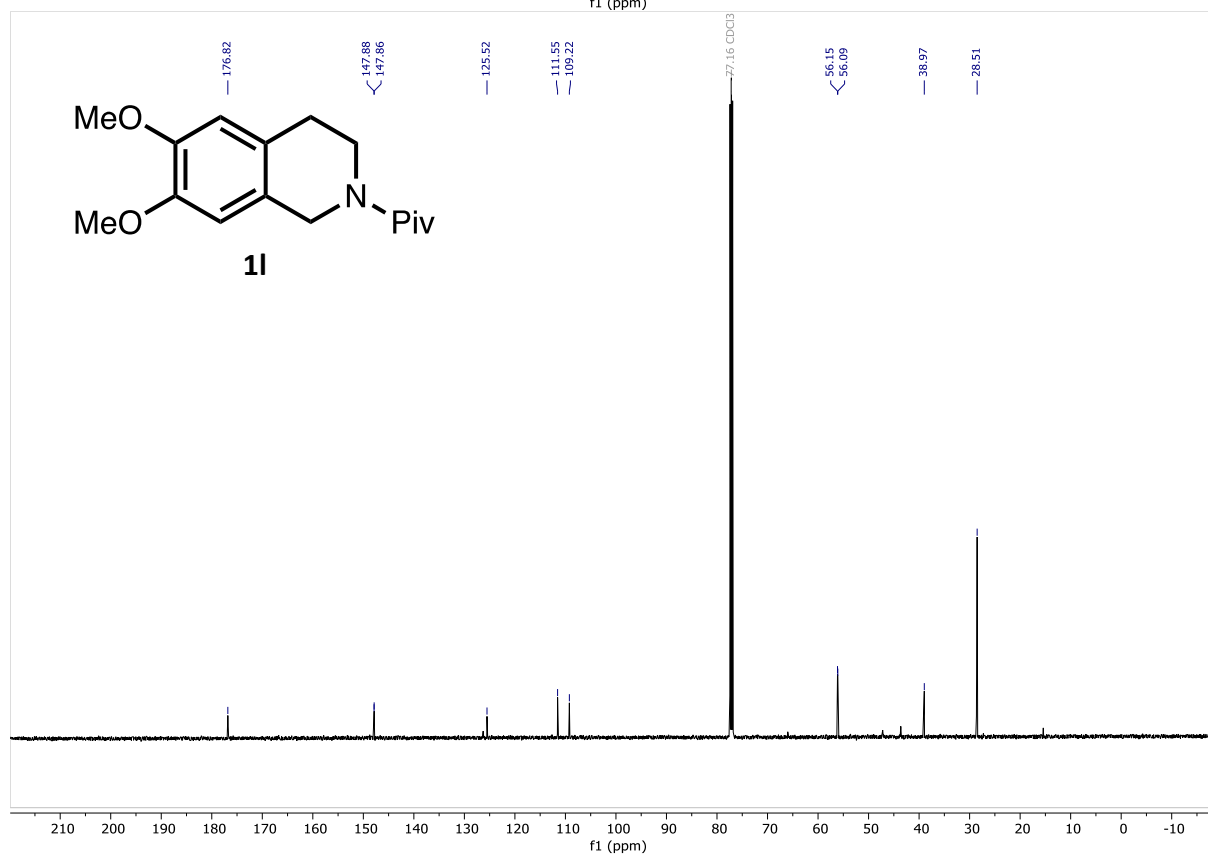

# 2,2-dimethyl-1-(piperidin-1-yl-*d*<sub>10</sub>)propan-1-one

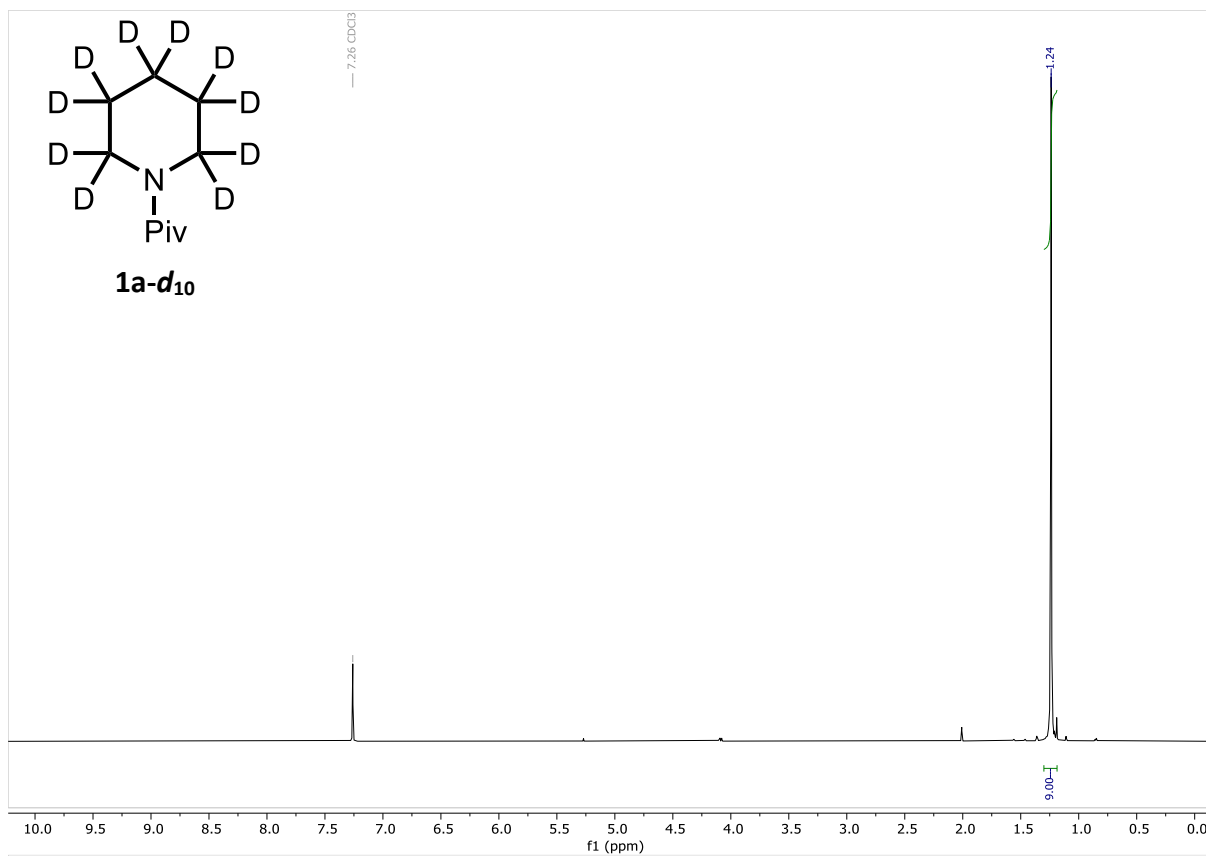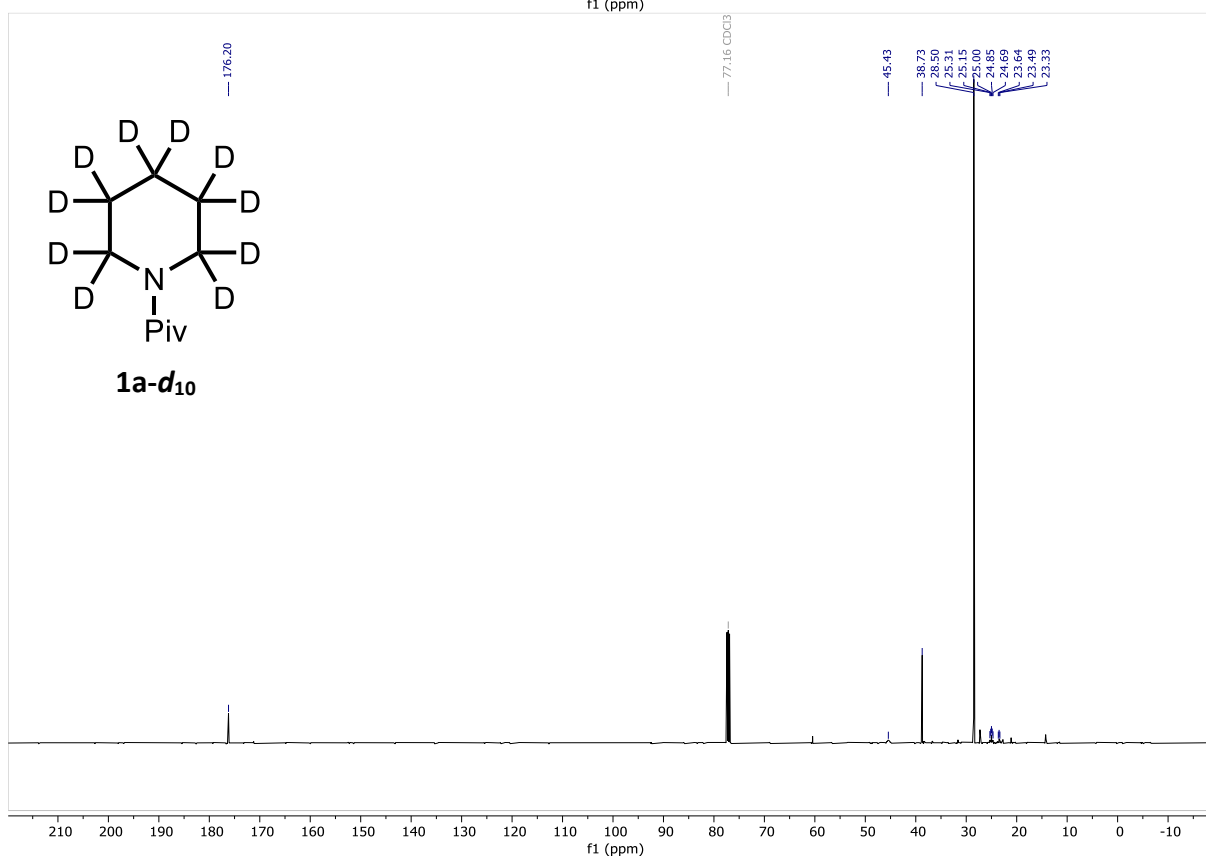

## NMR Spectra – Photocatalyst Screening

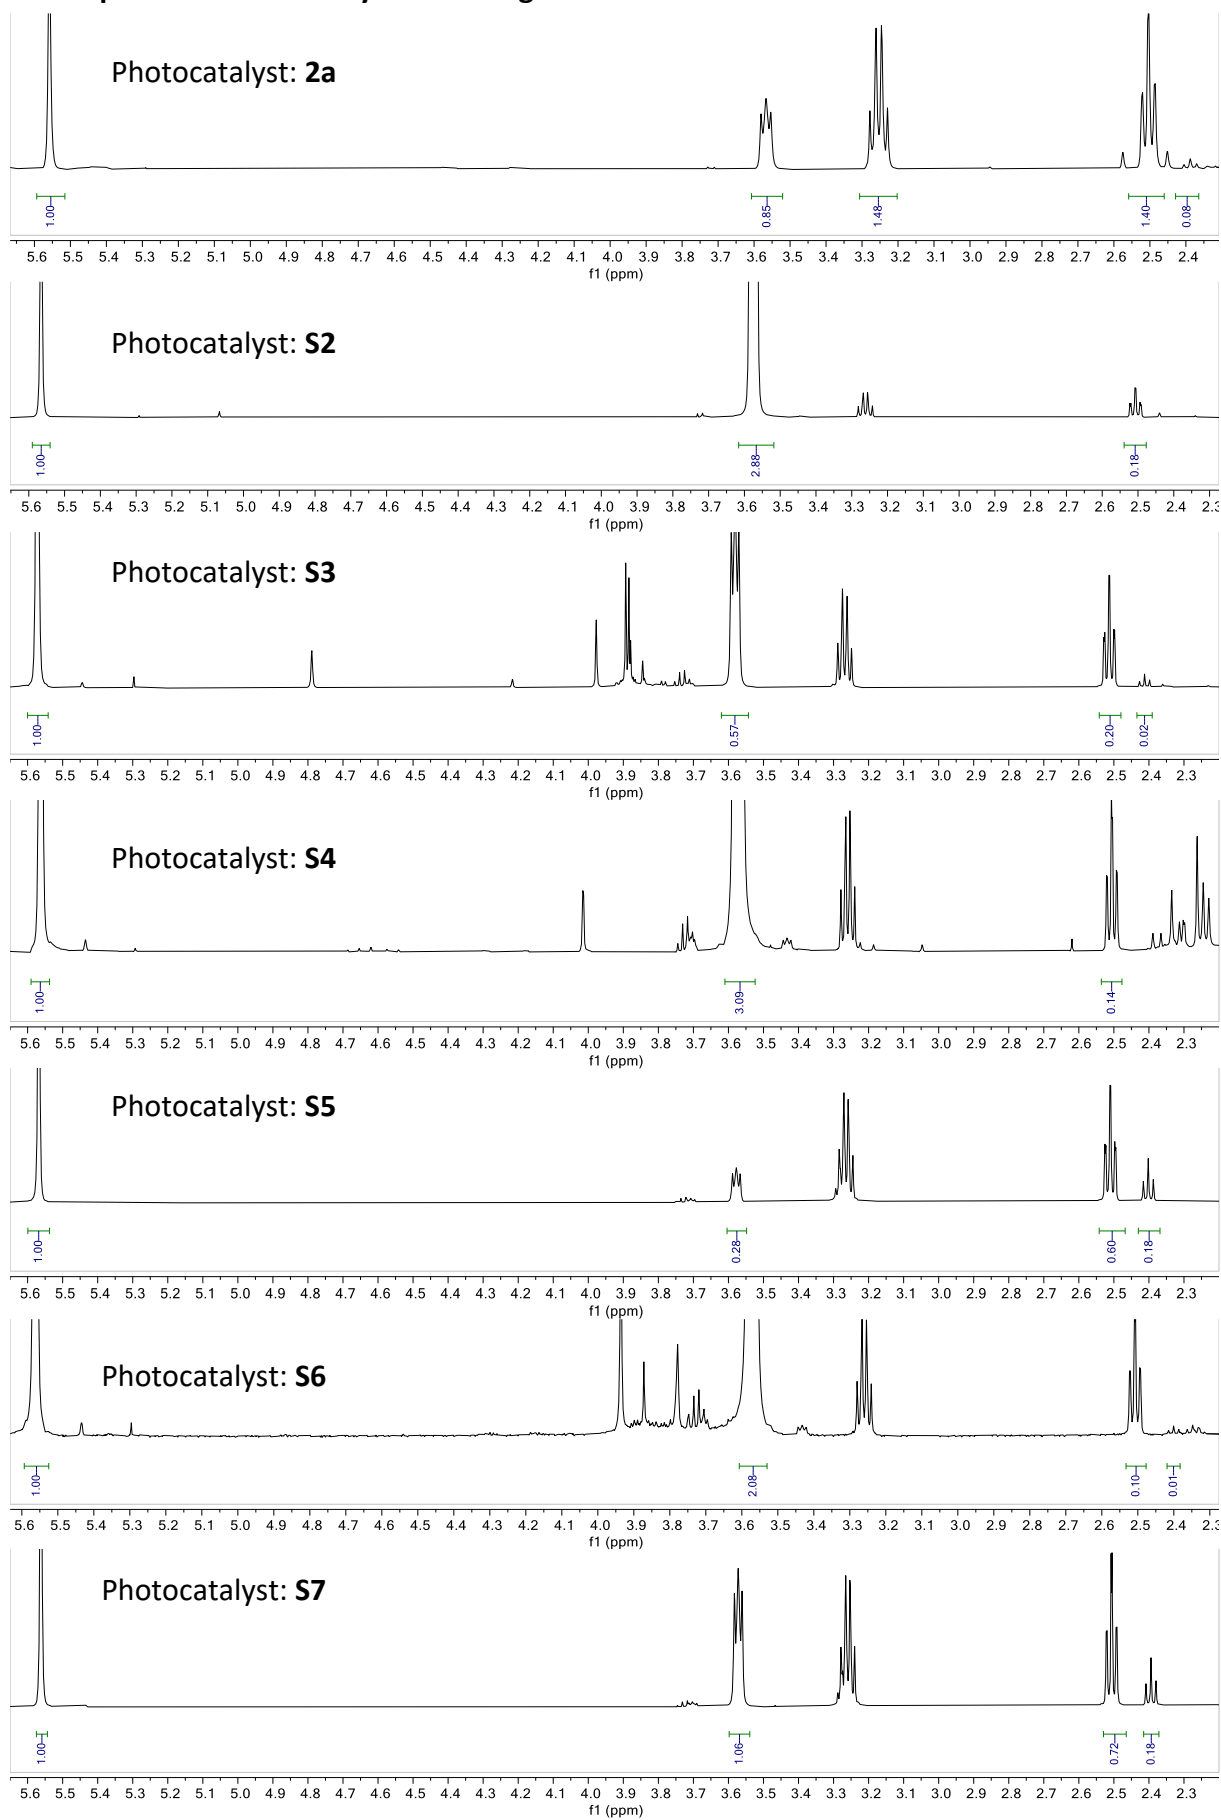

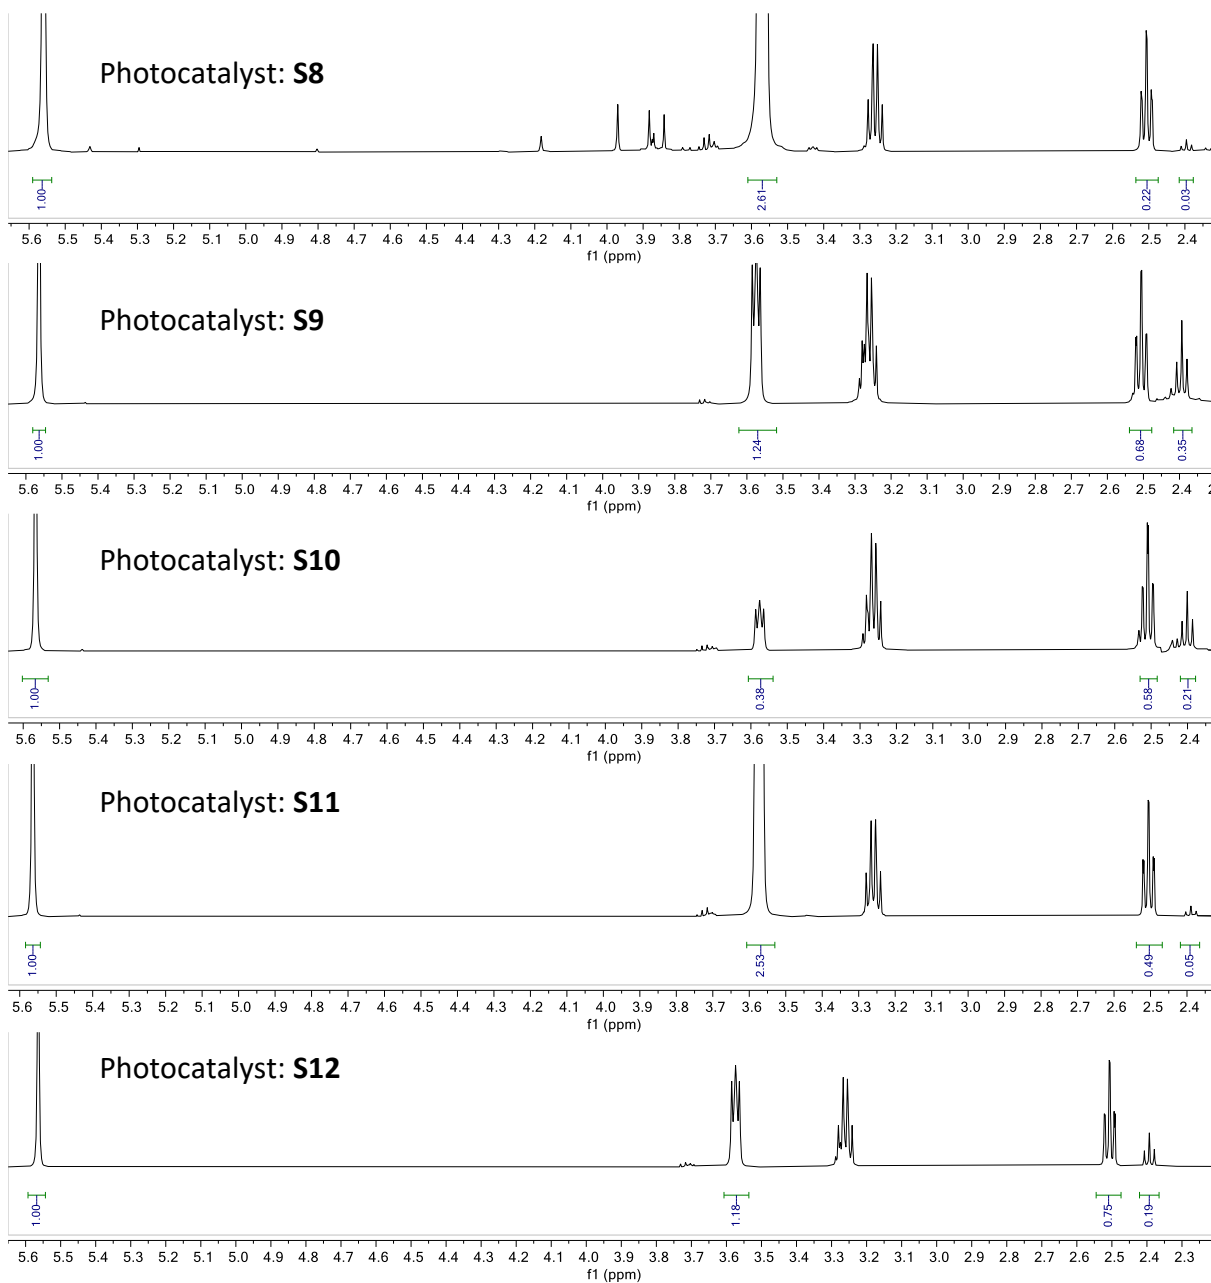

## NMR Spectra – Reaction Optimization

### Optimization of Reaction Time

For spectra of catalyst **S9** and **2a** for 60 min reaction time, see pg. S69.

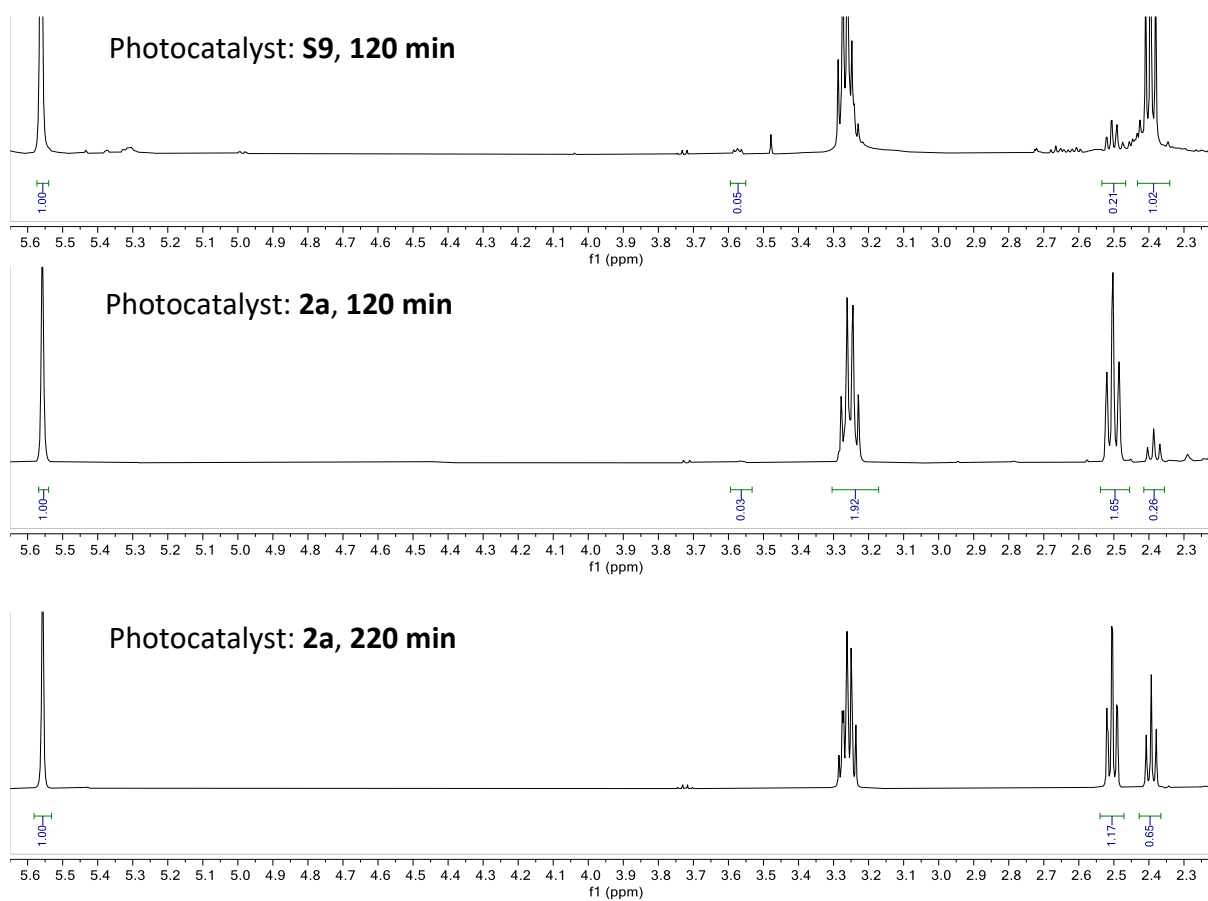

## Optimization of Catalyst Loading

For spectrum of catalyst **2a** for 5 mol% catalyst loading, see pg. S71.

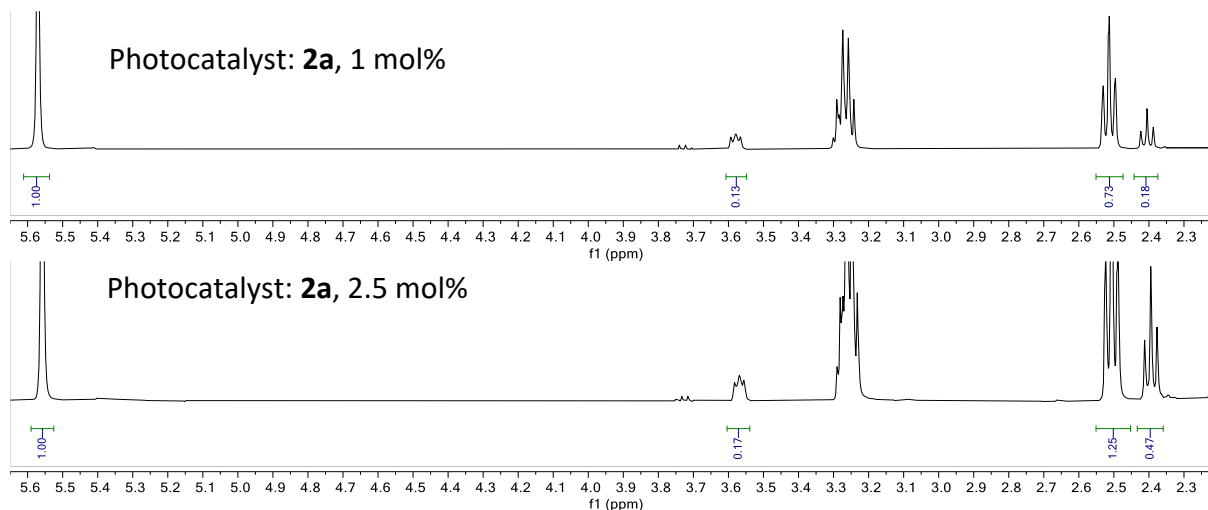

## Optimization of Oxidant and Solvent

For spectrum of catalyst **2a** and 3 equiv.  $K_2S_2O_8$ , see pg. S71.

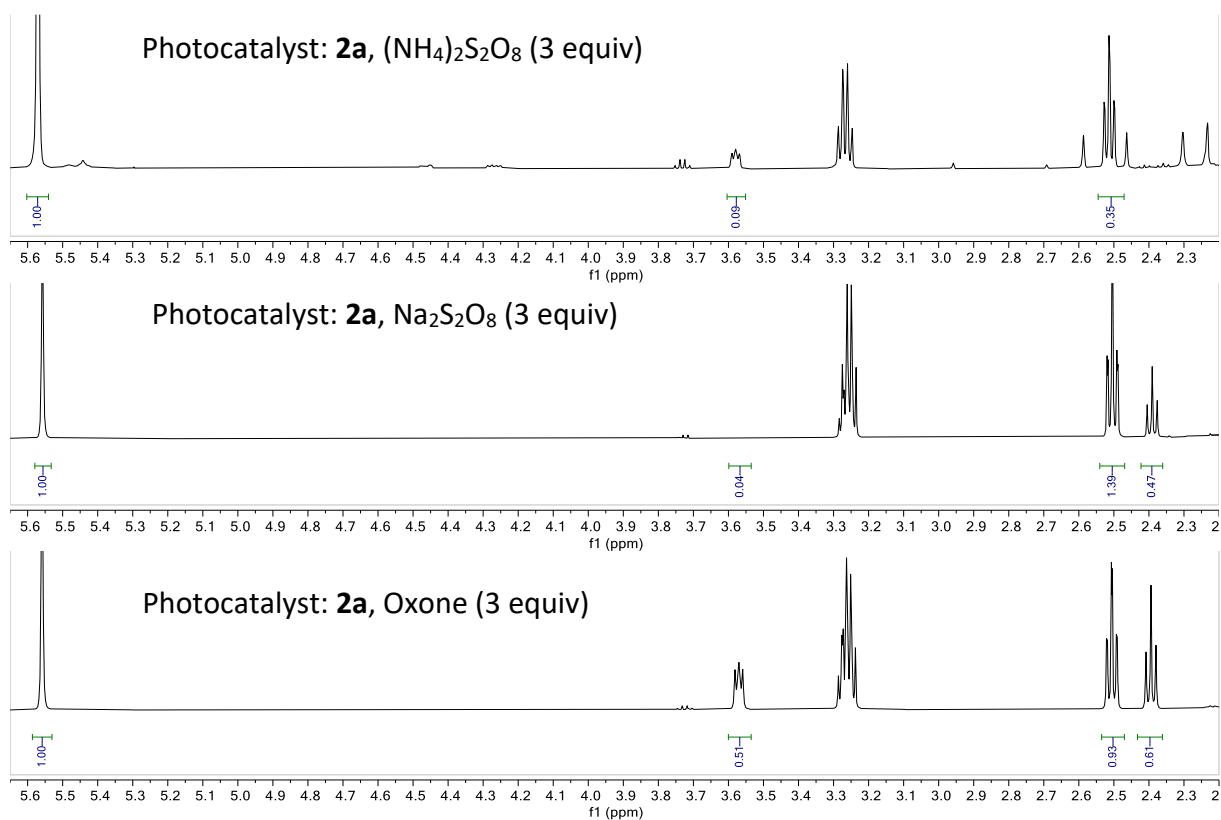



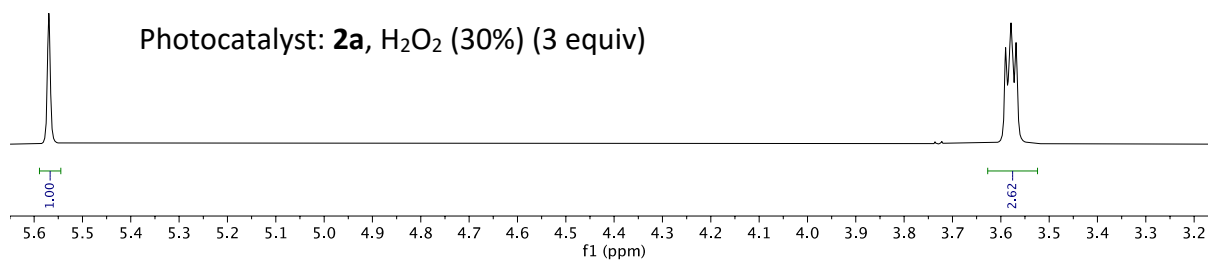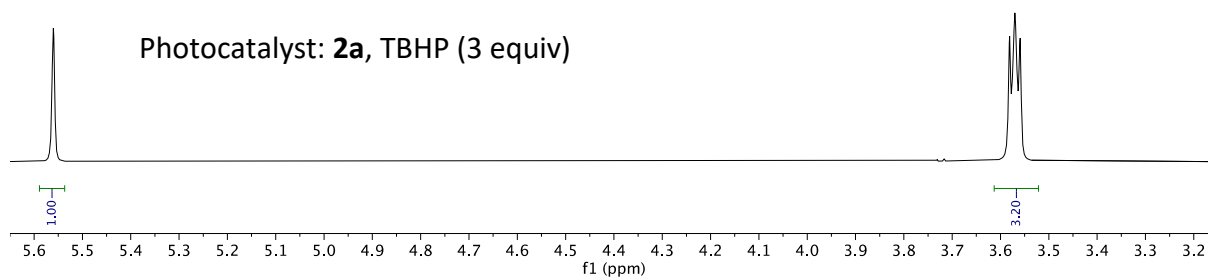

For spectrum of catalyst **2a** in 1:1 acetonitrile/water, see pg. S71.

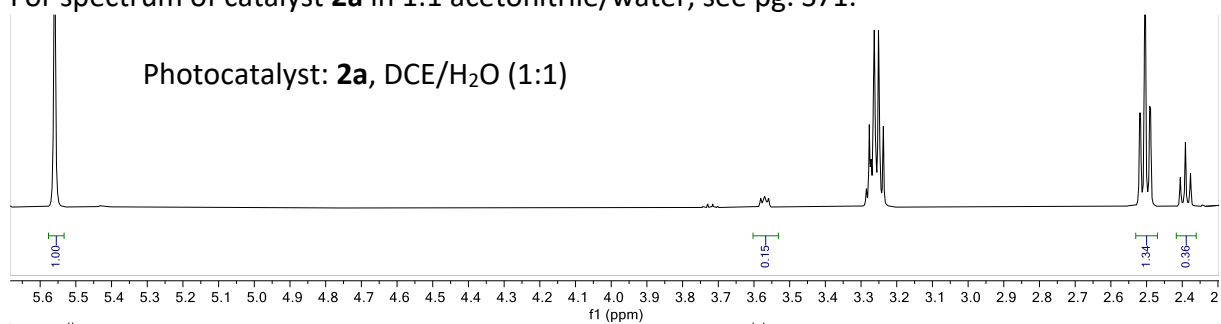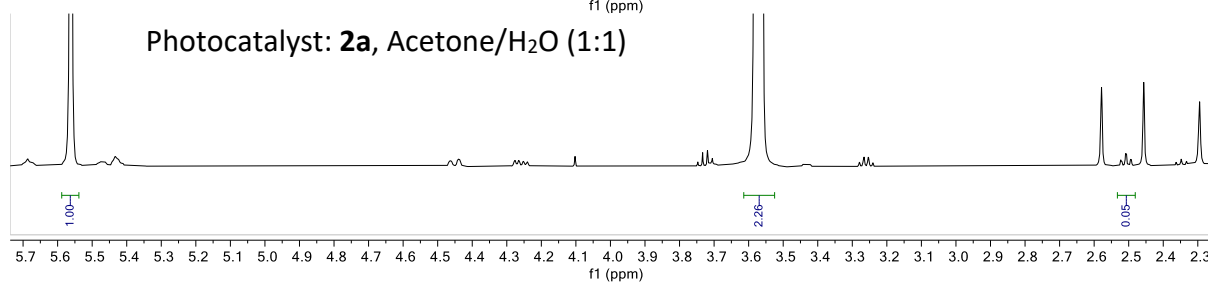

## NMR Spectra – Variation of Reaction Parameters

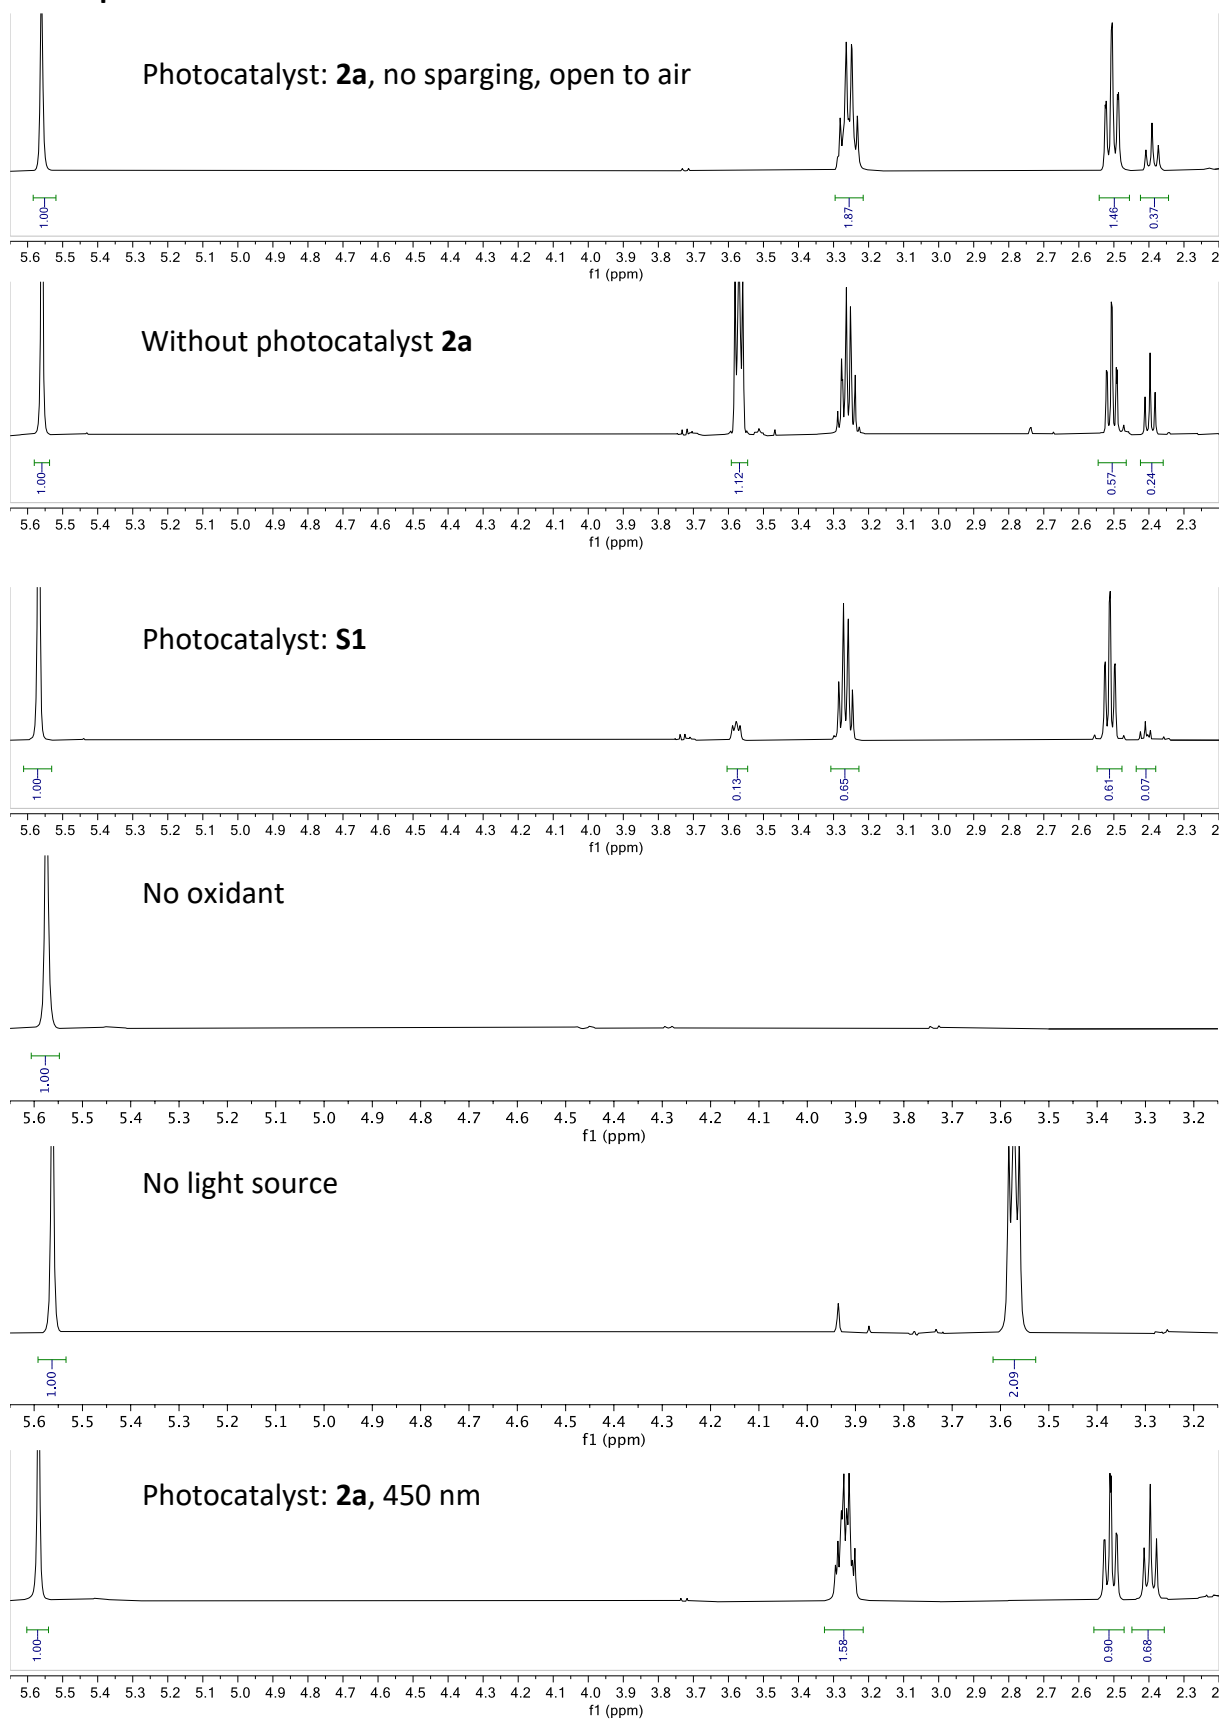

## NMR Spectra – N-Protecting Groups

For spectrum of N-Piv piperidine, see pg. S71.

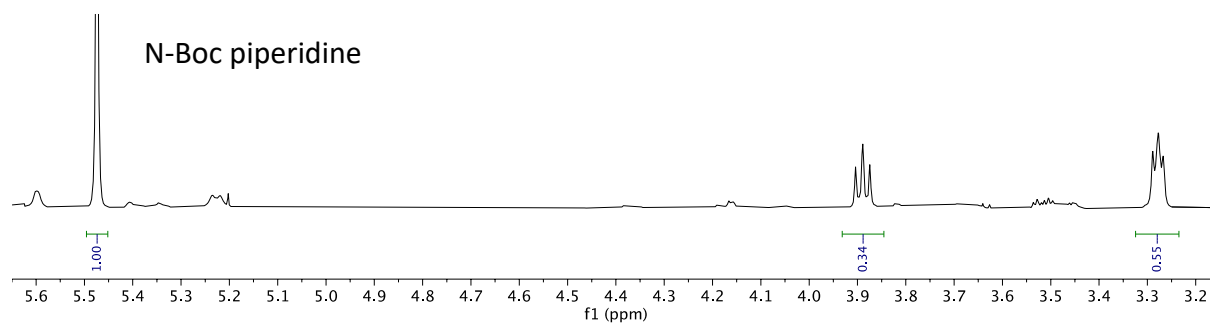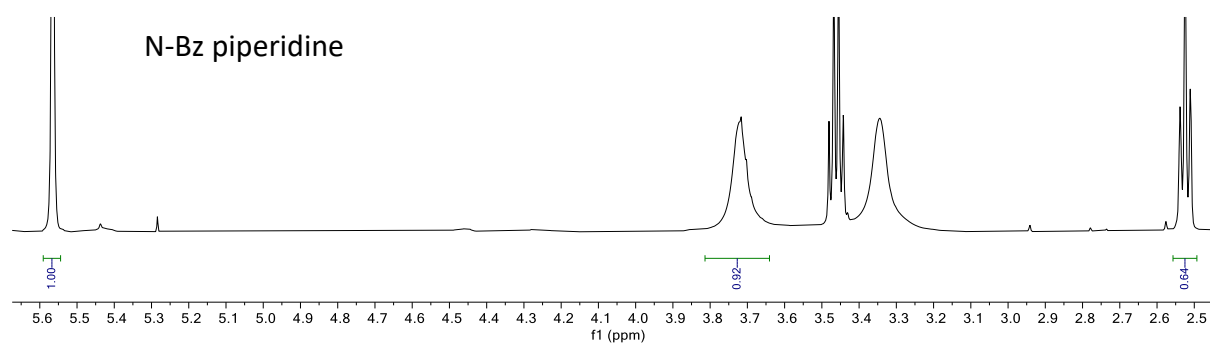

# NMR Spectra – Aldehyde Products

## N-(5-oxopentyl)pivalamide

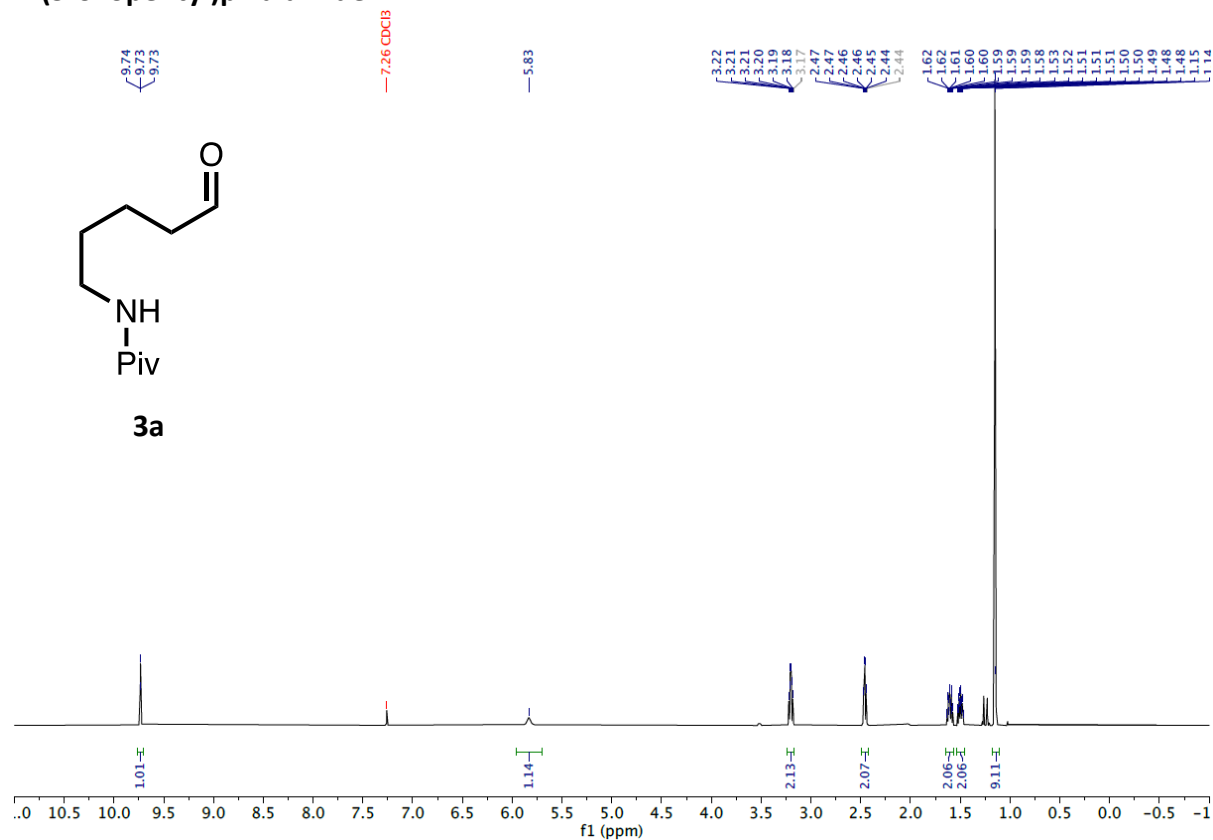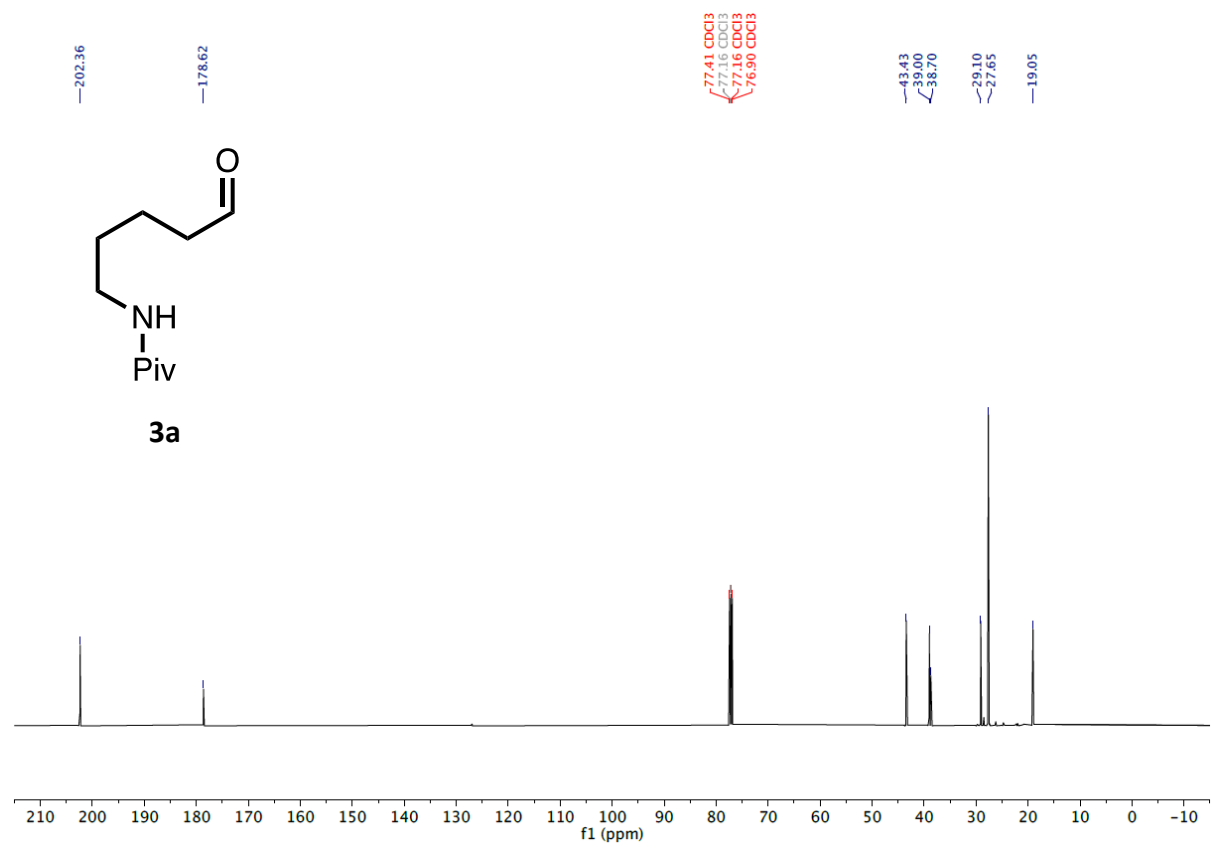

# 5-pivalamidopentanoic acid

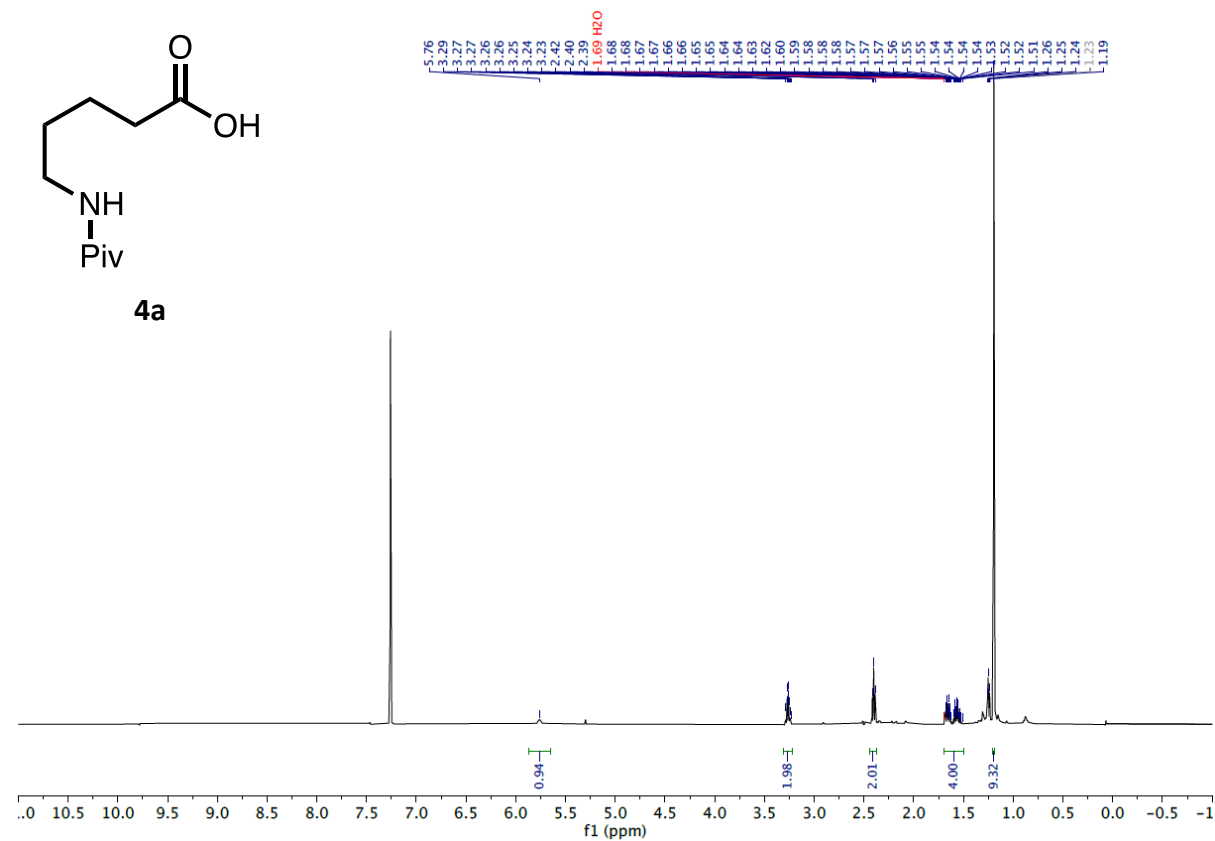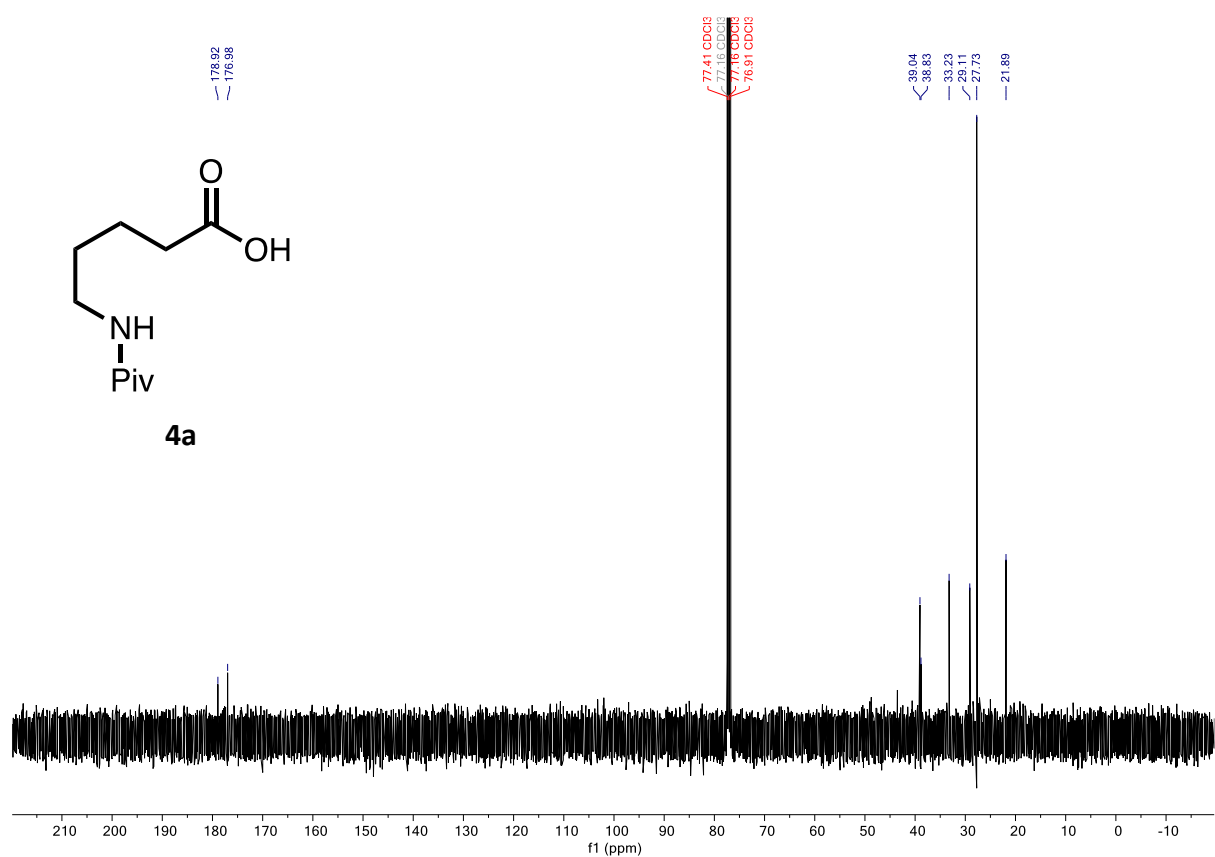

***N*-(4-oxobutyl)pivalamide**

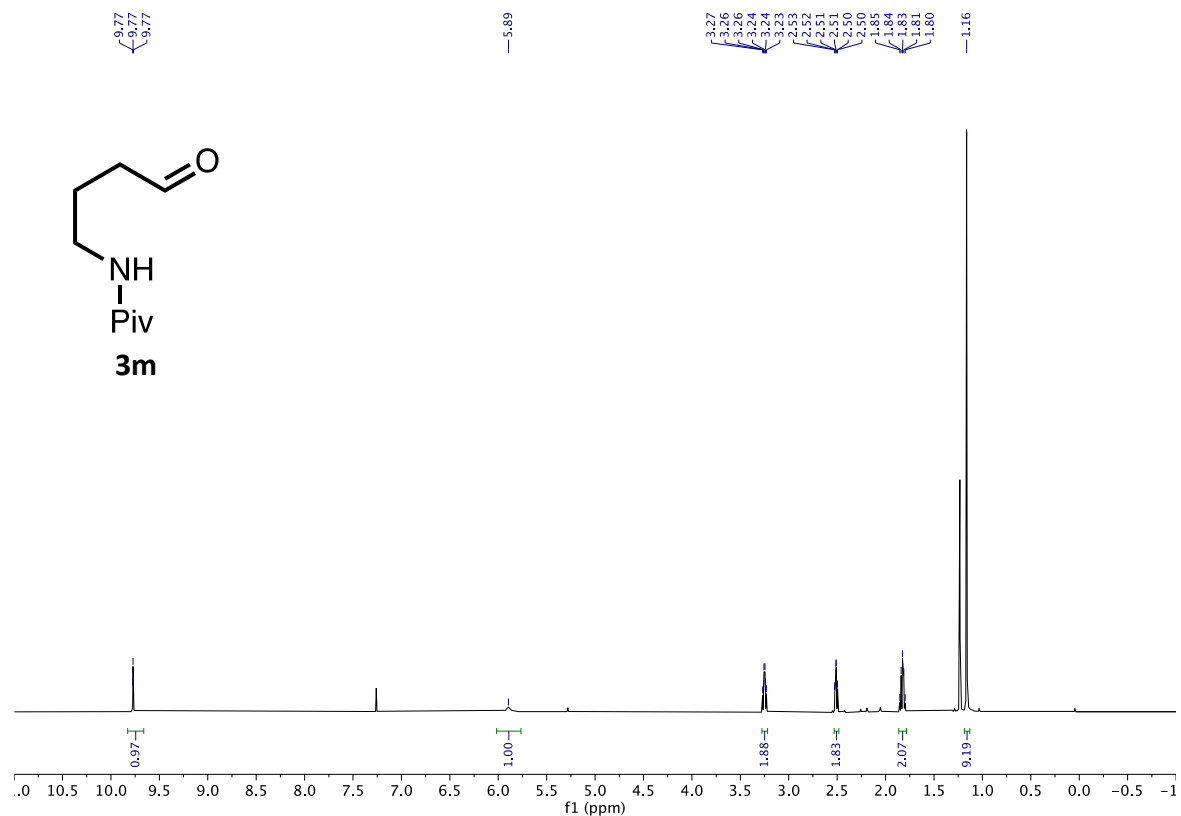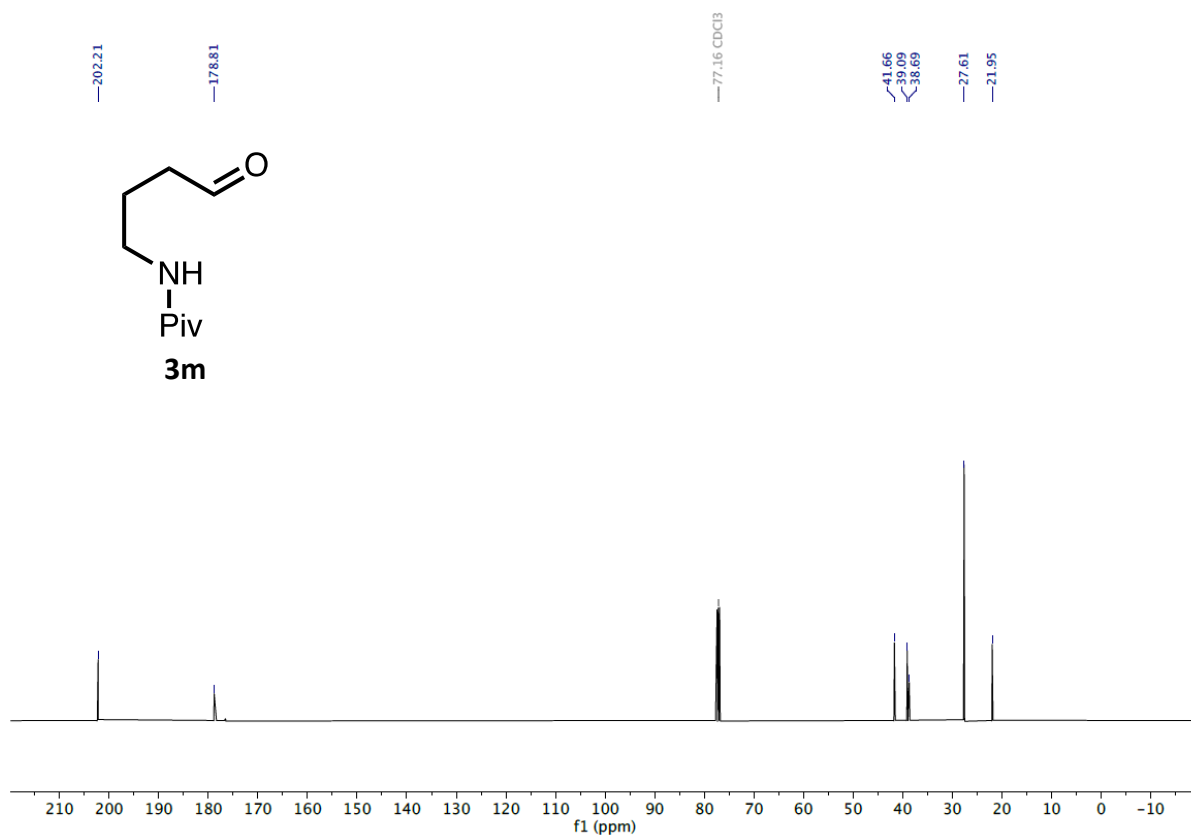

# 4-pivalamidobutanoic acid

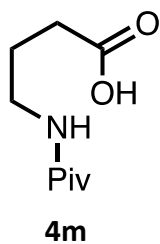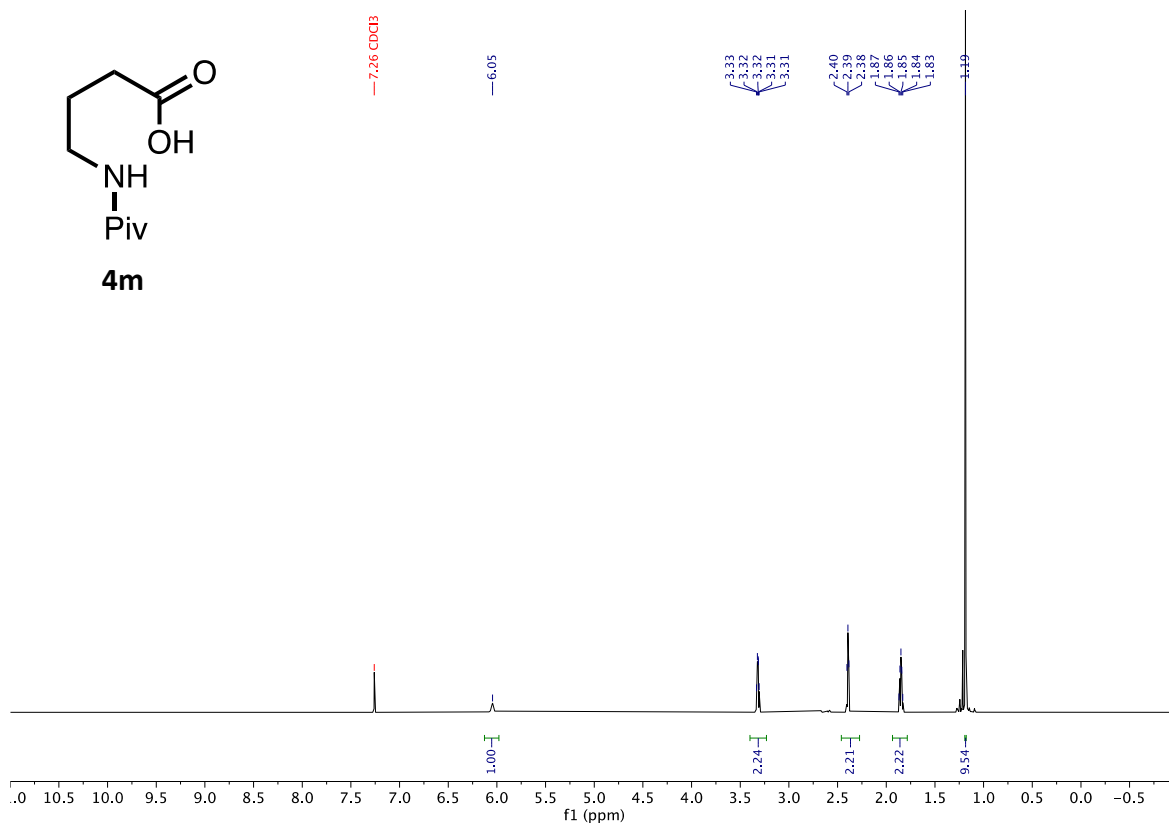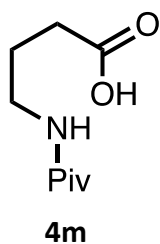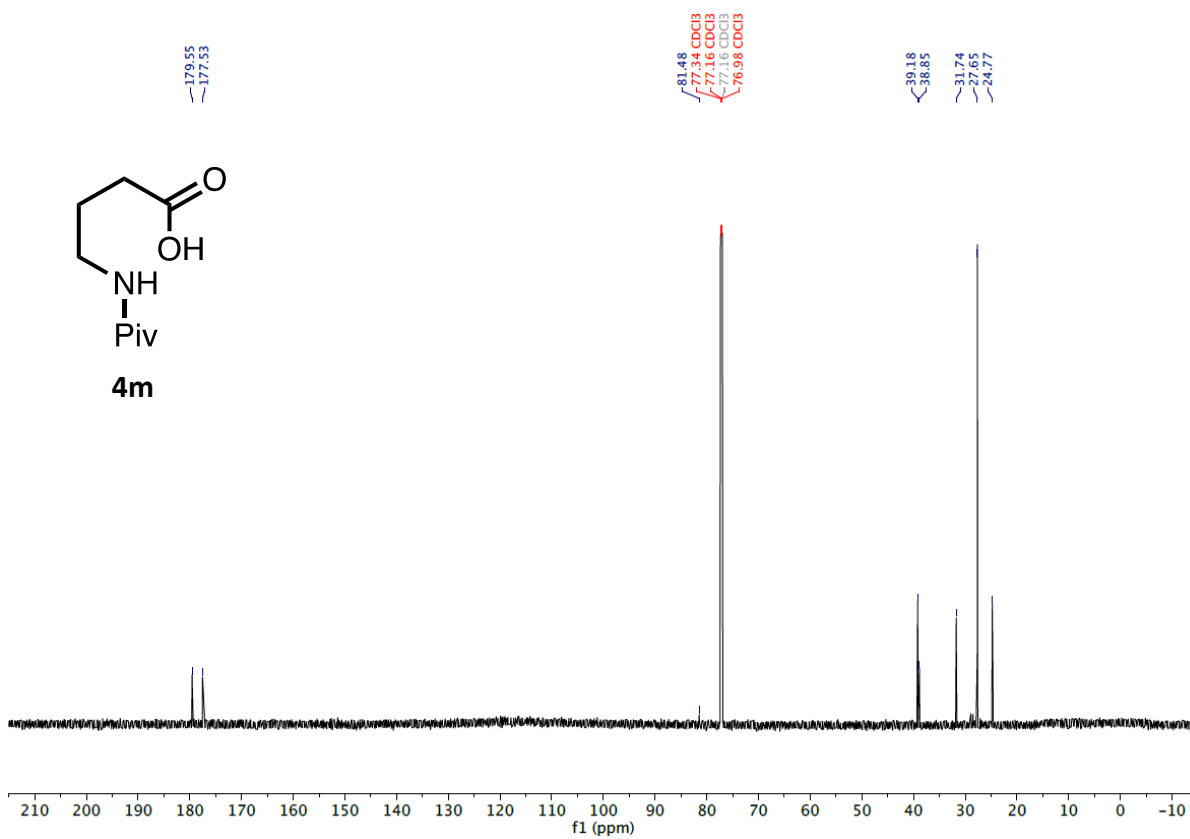

# *N*-(6-oxohexyl)pivalamide

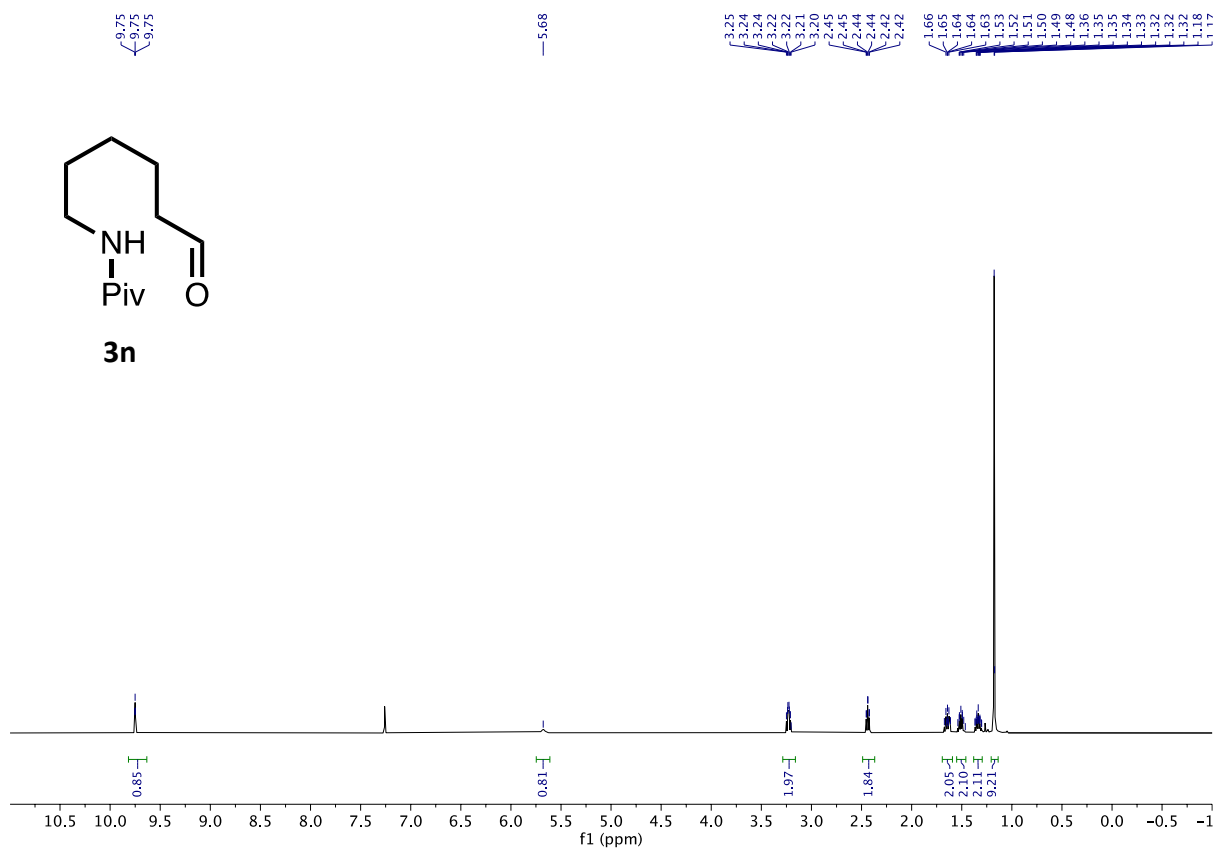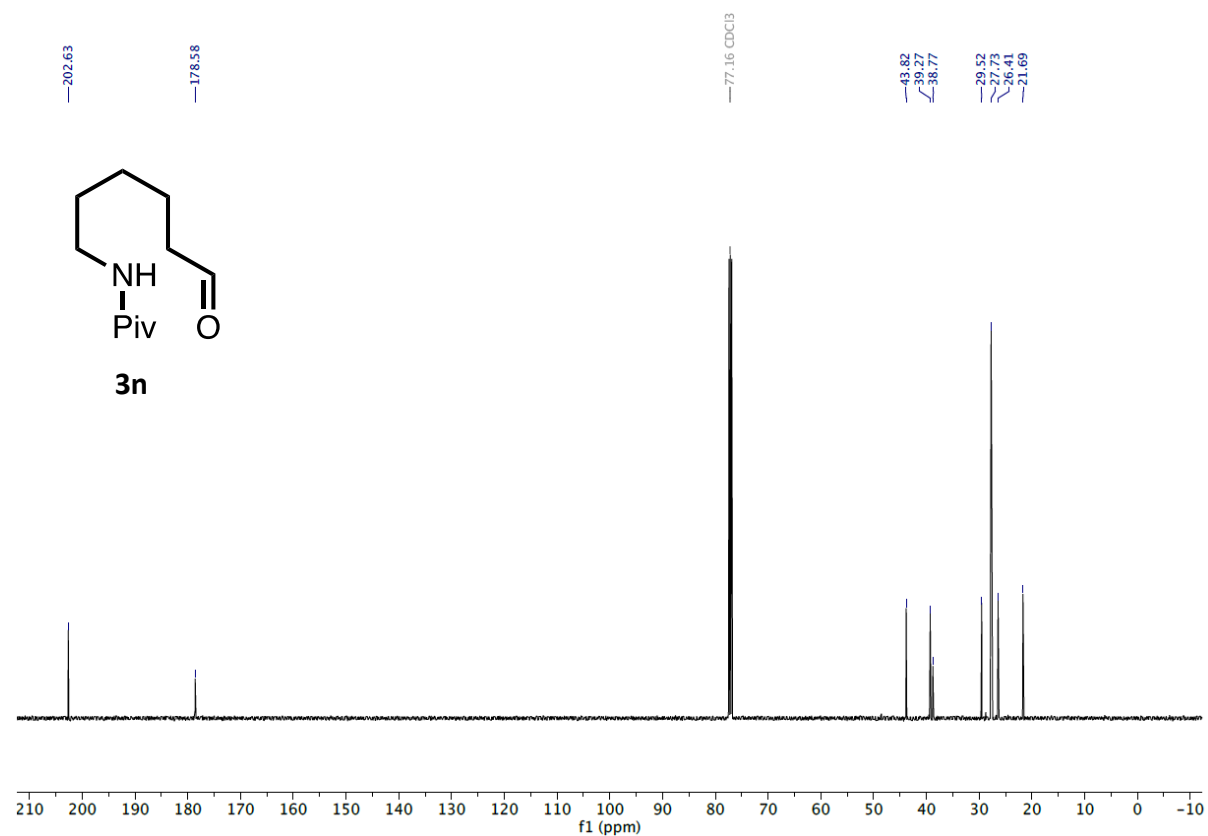



6-pivalamidohexanoic acid

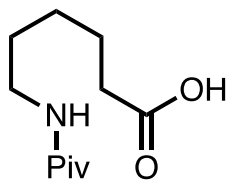

4n

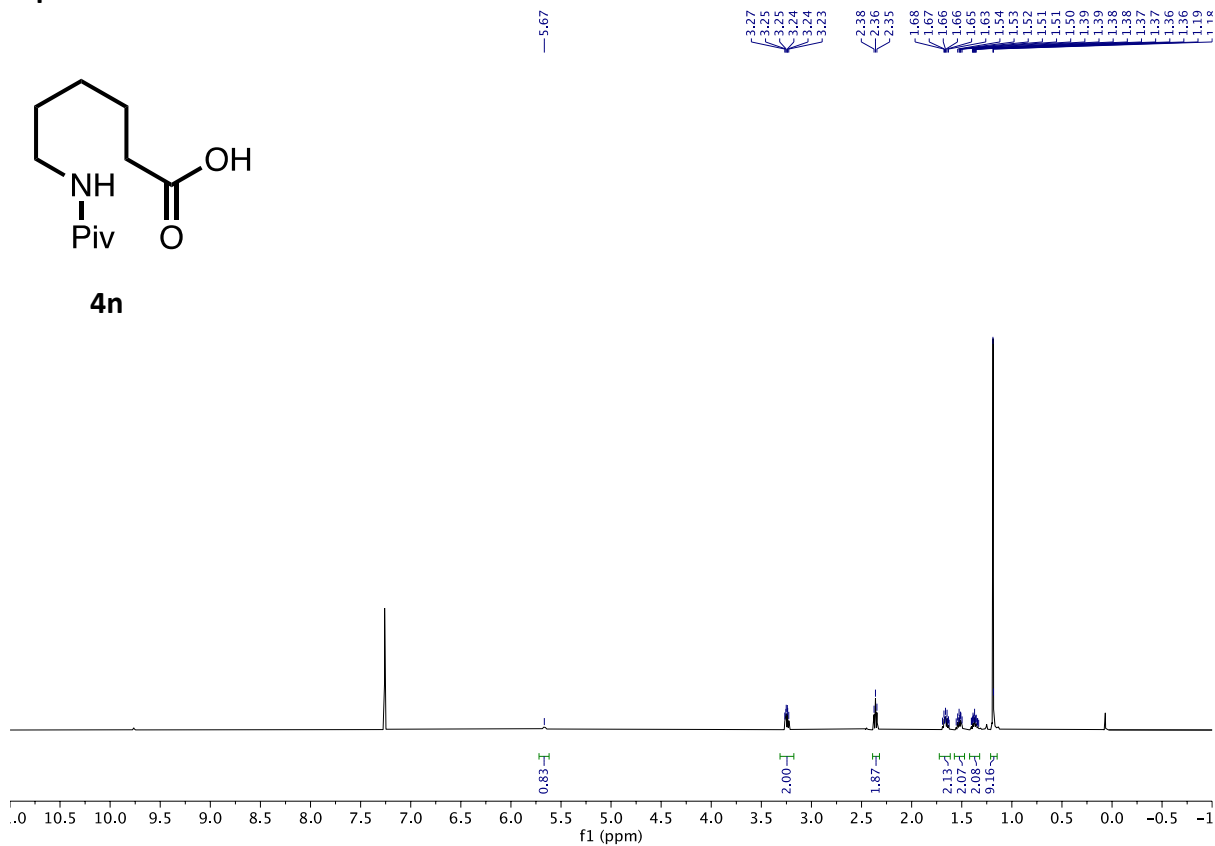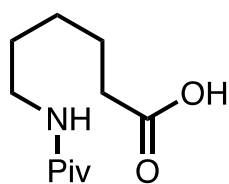

4n

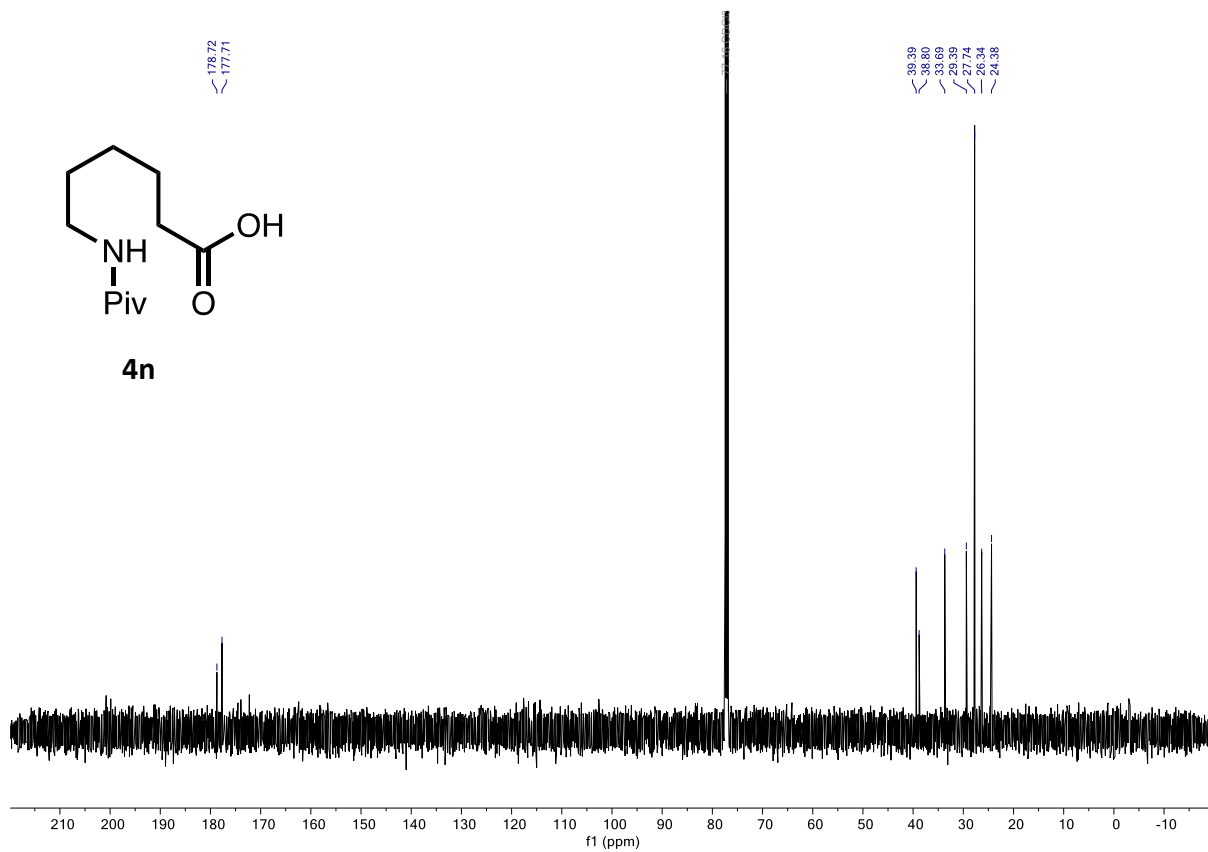

***N*-(7-oxoheptyl)pivalamide**

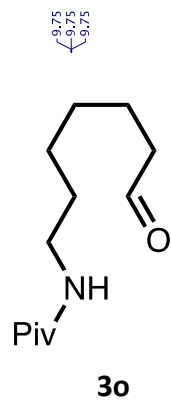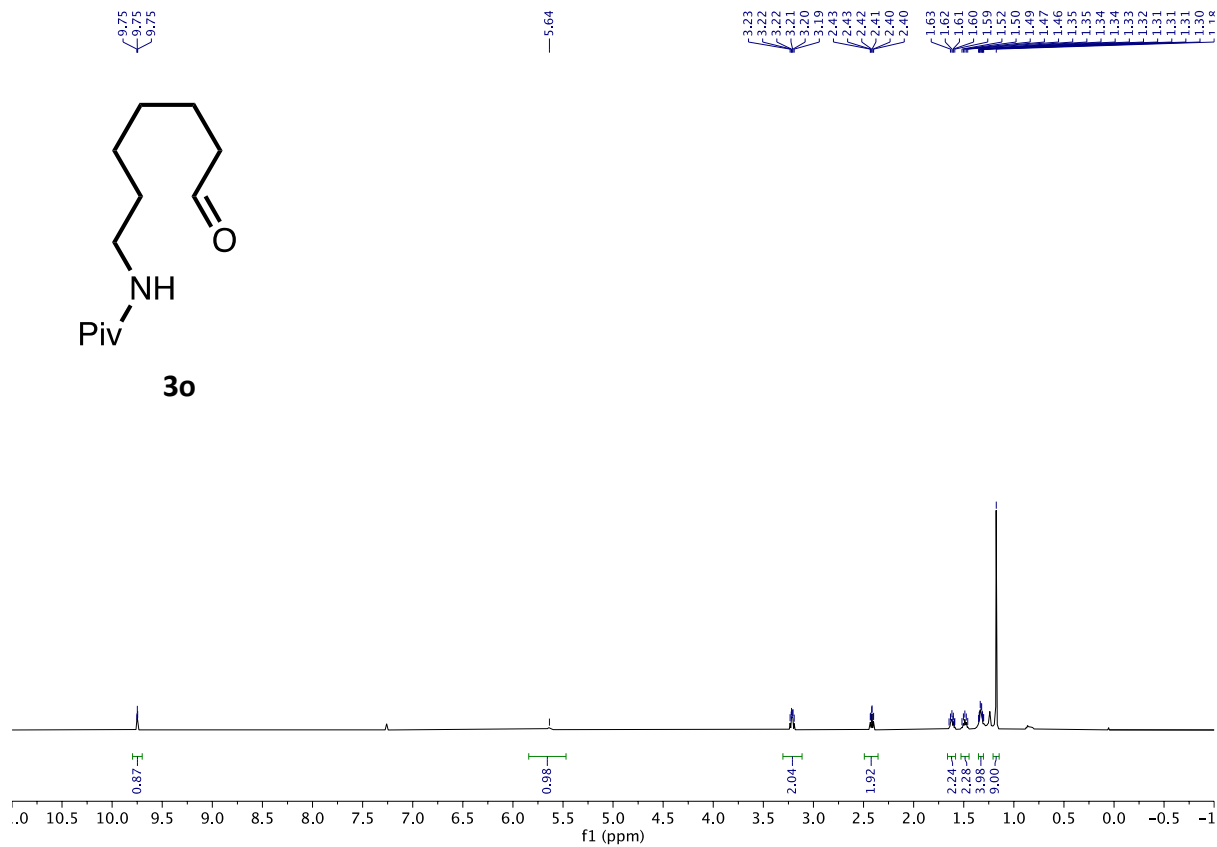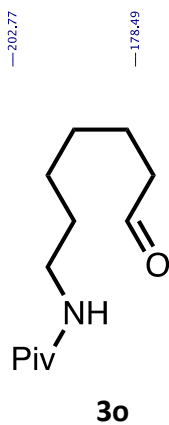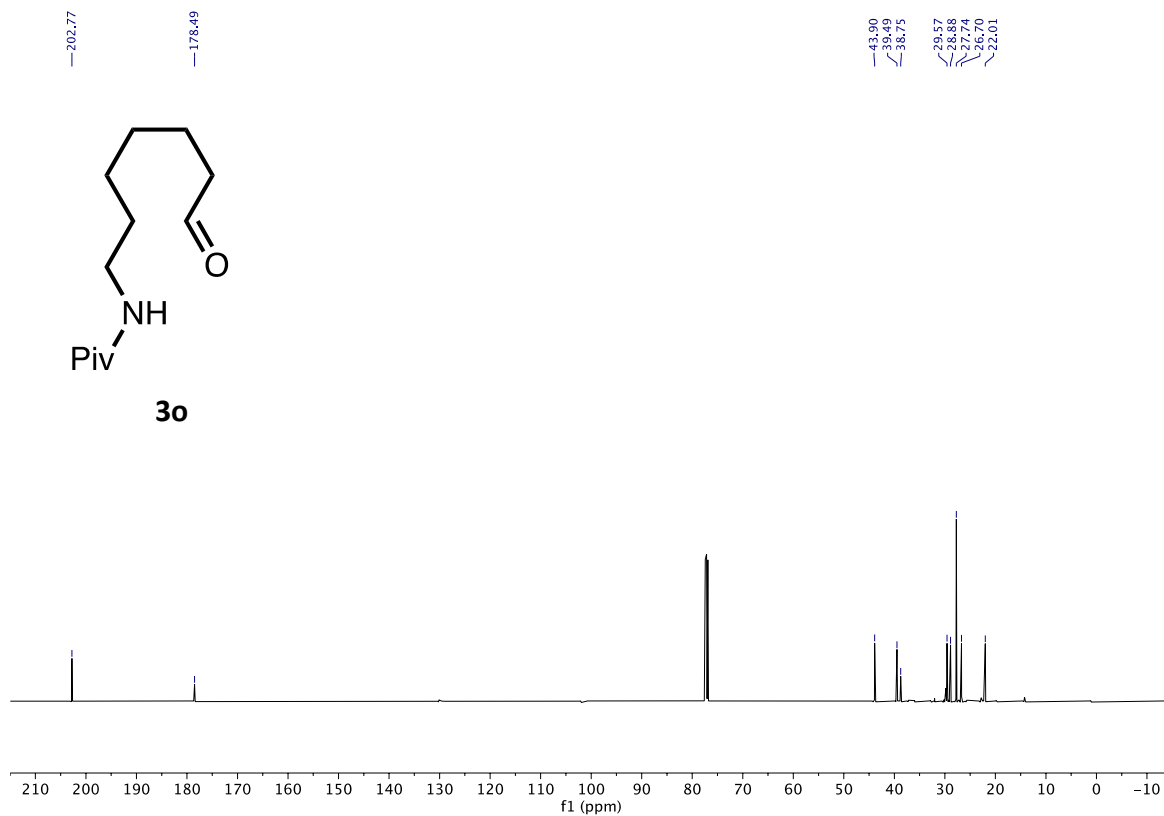



# N-(3-(4-chlorophenyl)-5-oxopentyl)pivalamide

9.67, 9.67, 9.67, 7.29, 7.28, 7.27, 7.26, 7.16, 7.15, 7.14, 7.13, 5.63, 3.24, 3.23, 3.23, 3.22, 3.21, 3.20, 3.19, 3.17, 3.16, 3.14, 3.09, 3.07, 3.06, 3.06, 3.04, 3.04, 3.03, 3.03, 3.02, 2.82, 2.81, 2.80, 2.78, 2.78, 2.77, 2.77, 2.76, 2.75, 2.74, 2.74, 2.72, 2.72, 2.71, 2.71, 1.90, 1.89, 1.88, 1.88, 1.88, 1.87, 1.86, 1.85, 1.85, 1.84, 1.82, 1.81, 1.80, 1.79, 1.79, 1.78, 1.78, 1.77, 1.76, 1.76, 1.75, 1.75, 1.14

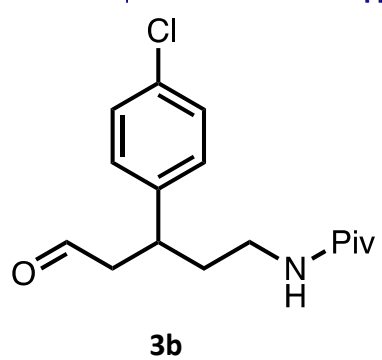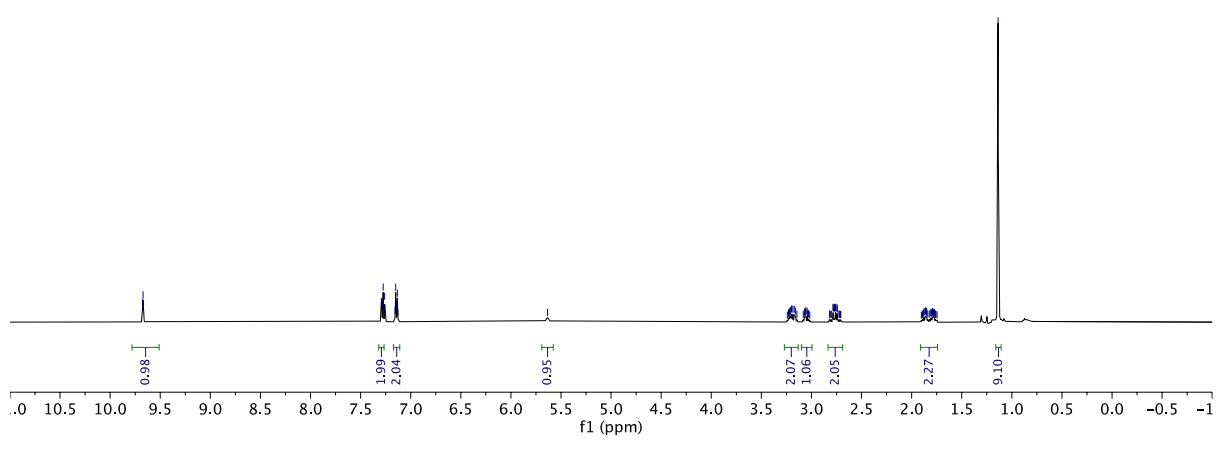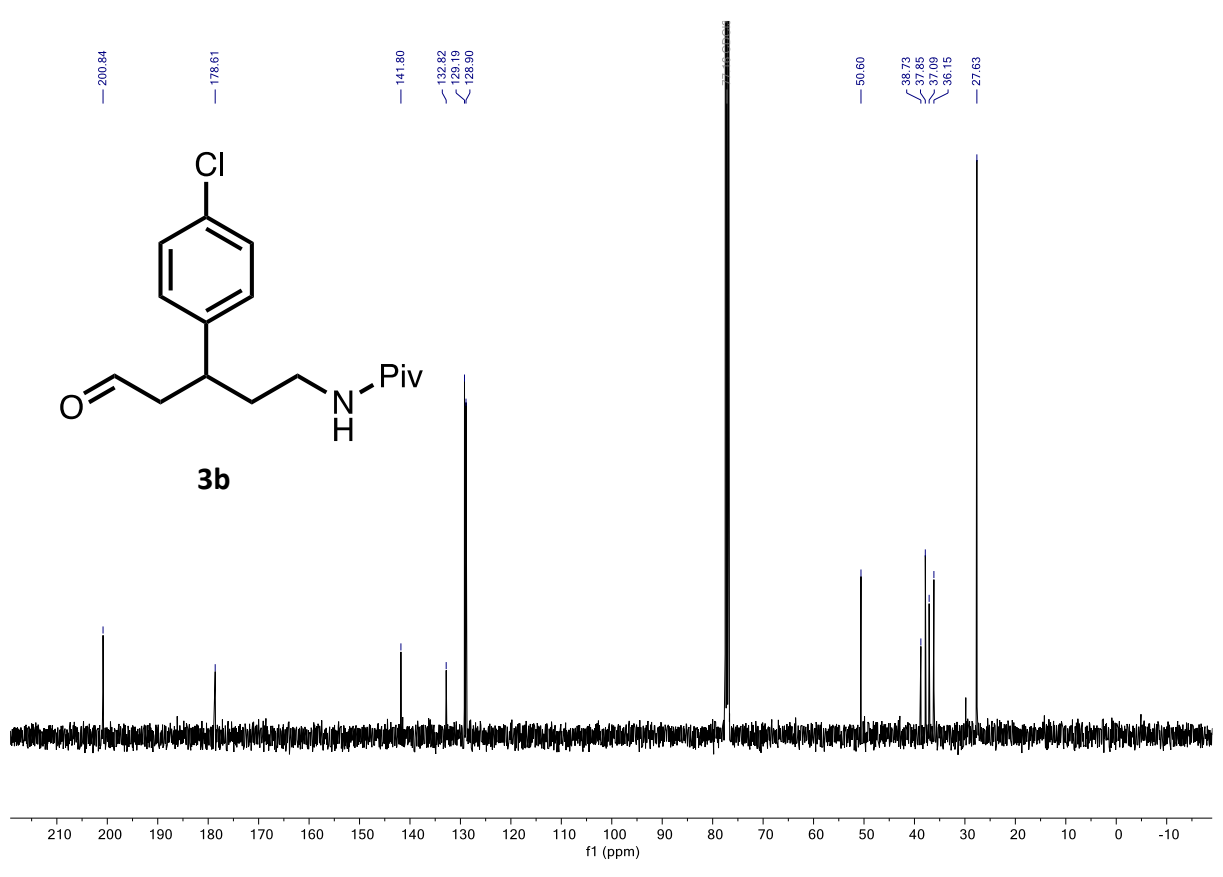

***N*-(5-oxo-3-phenylpentyl)pivalamide**

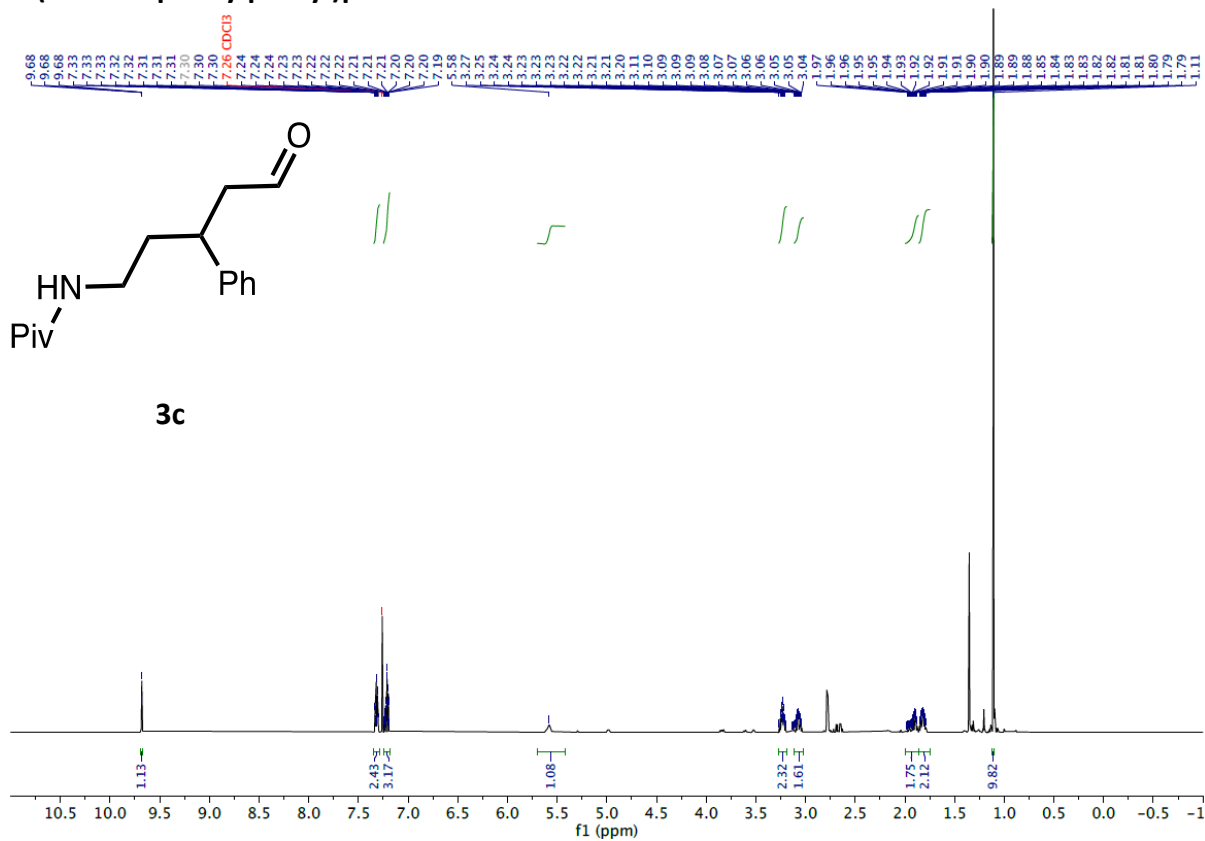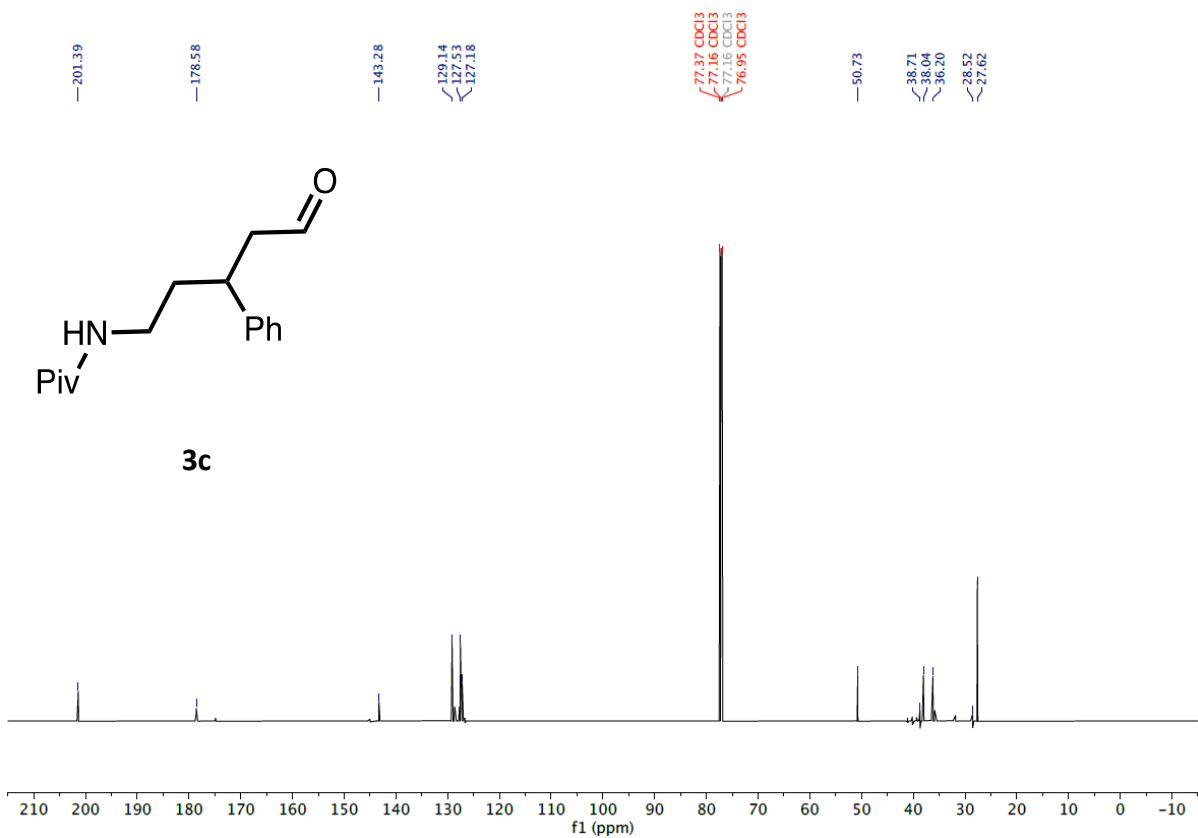

***N*-(3-methyl-5-oxopentyl)pivalamide**

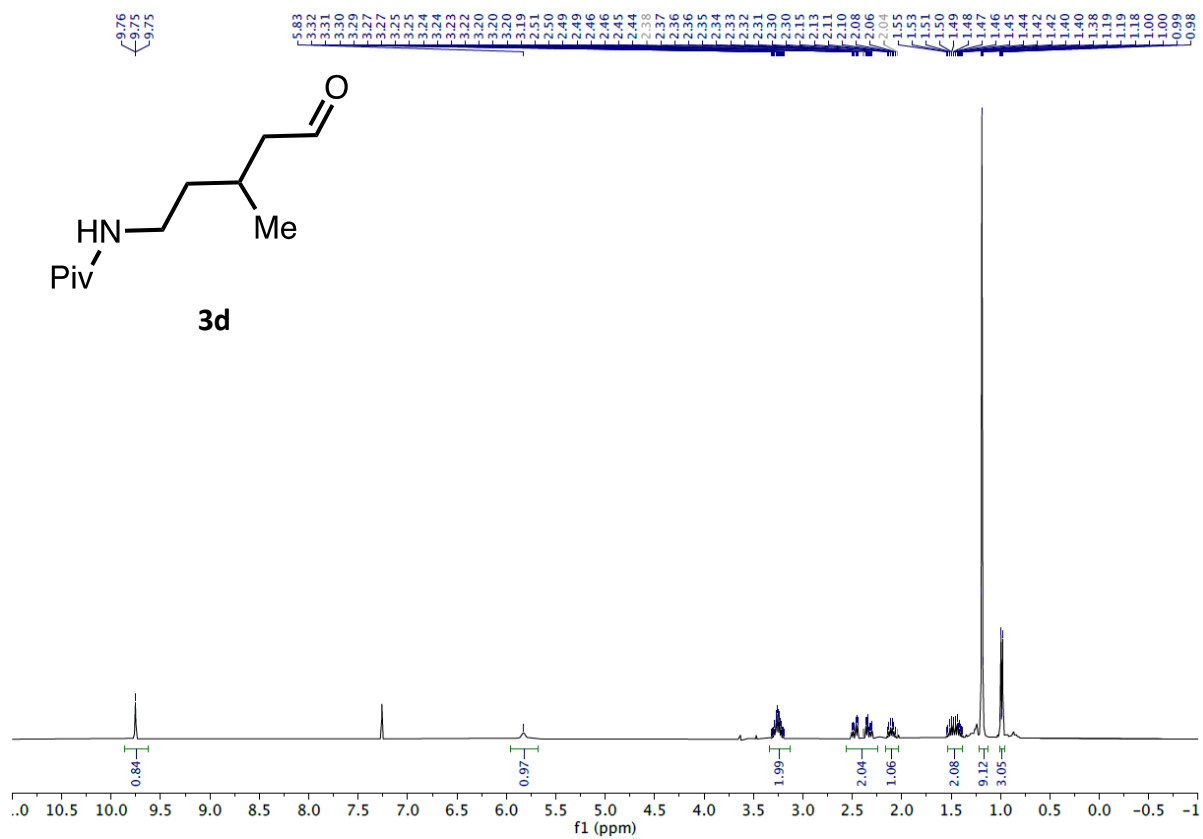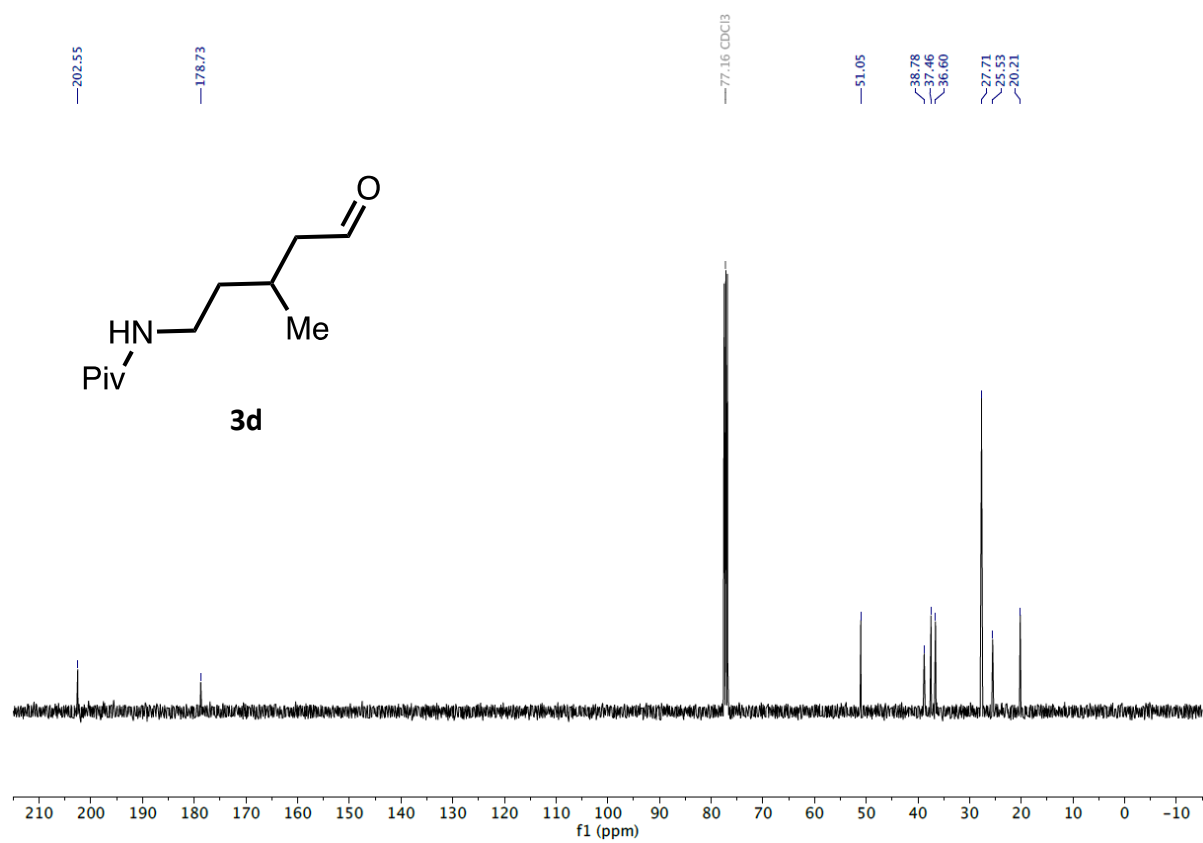







***N*-(7-oxoheptan-3-yl)pivalamide**

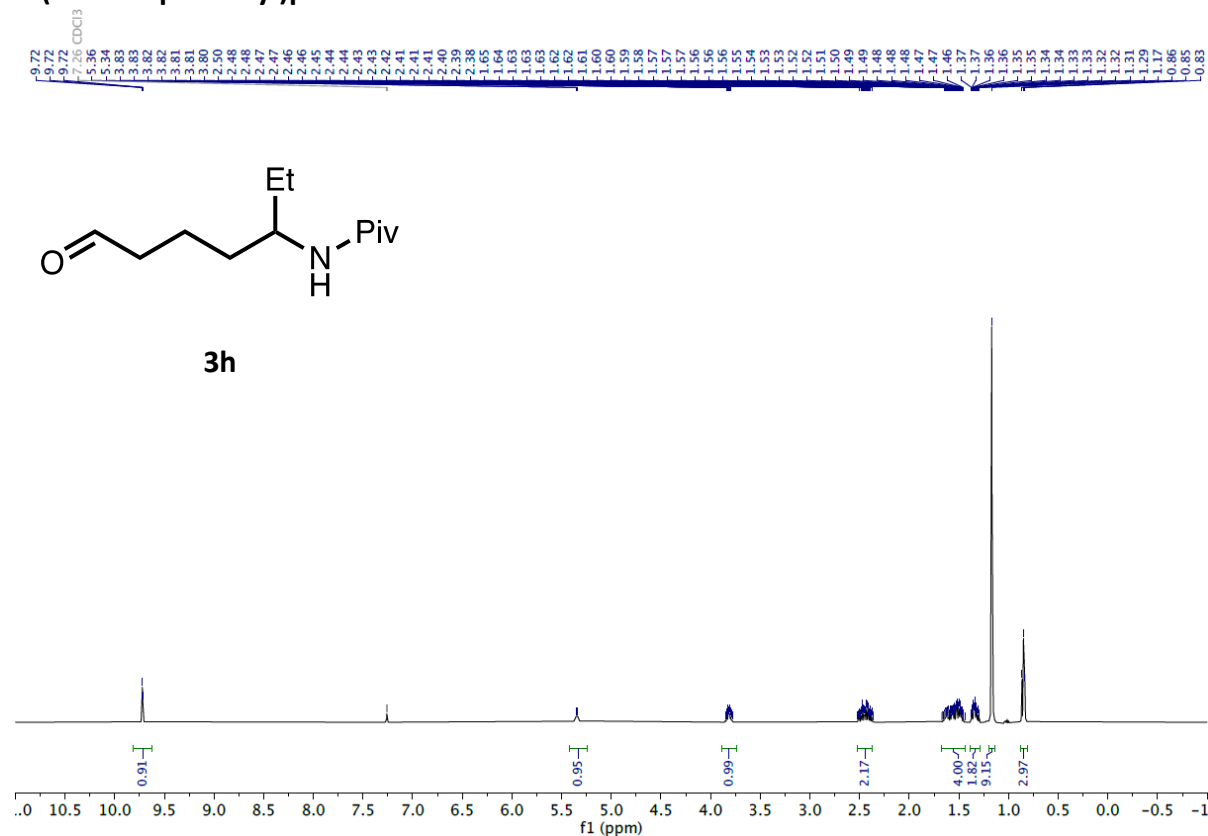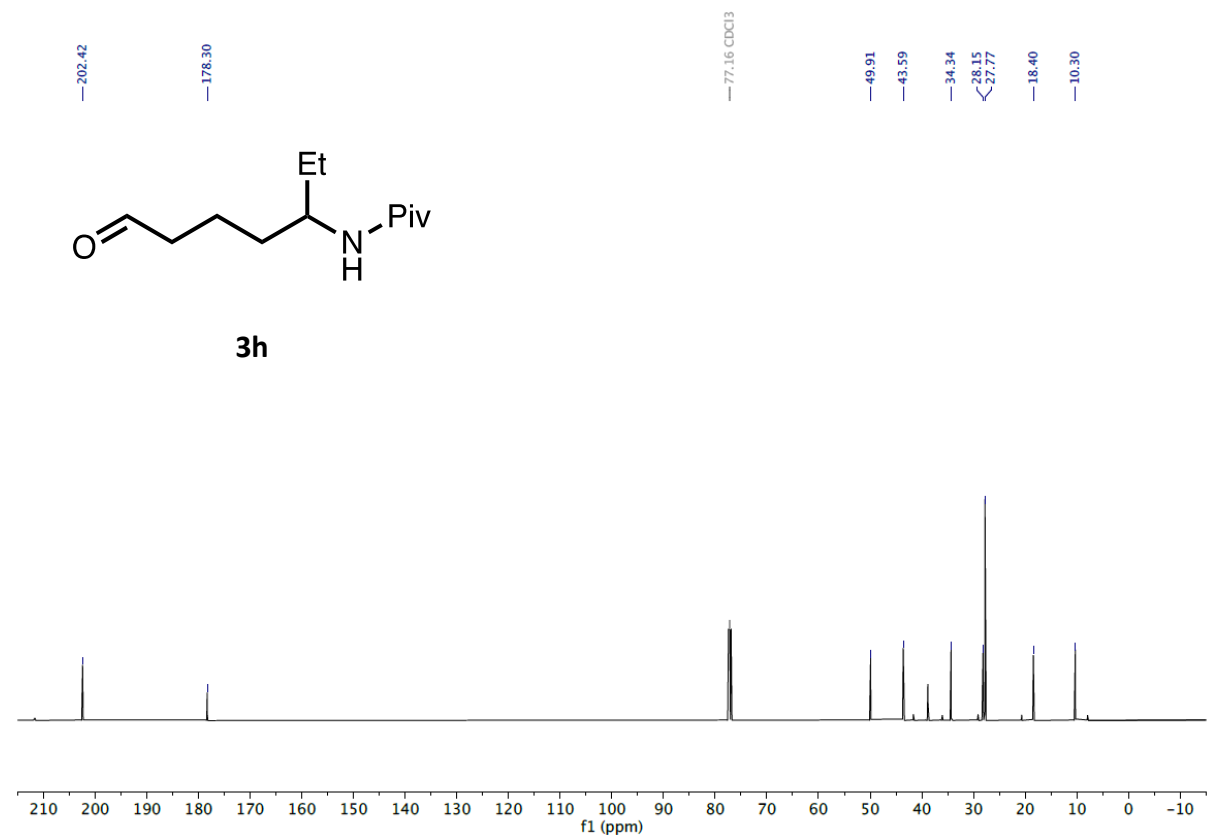



***N*-(2-methyl-5-oxopentyl)pivalamide (3i.a) and *N*-(4-methyl-5-oxopentyl)pivalamide (3i.b)**

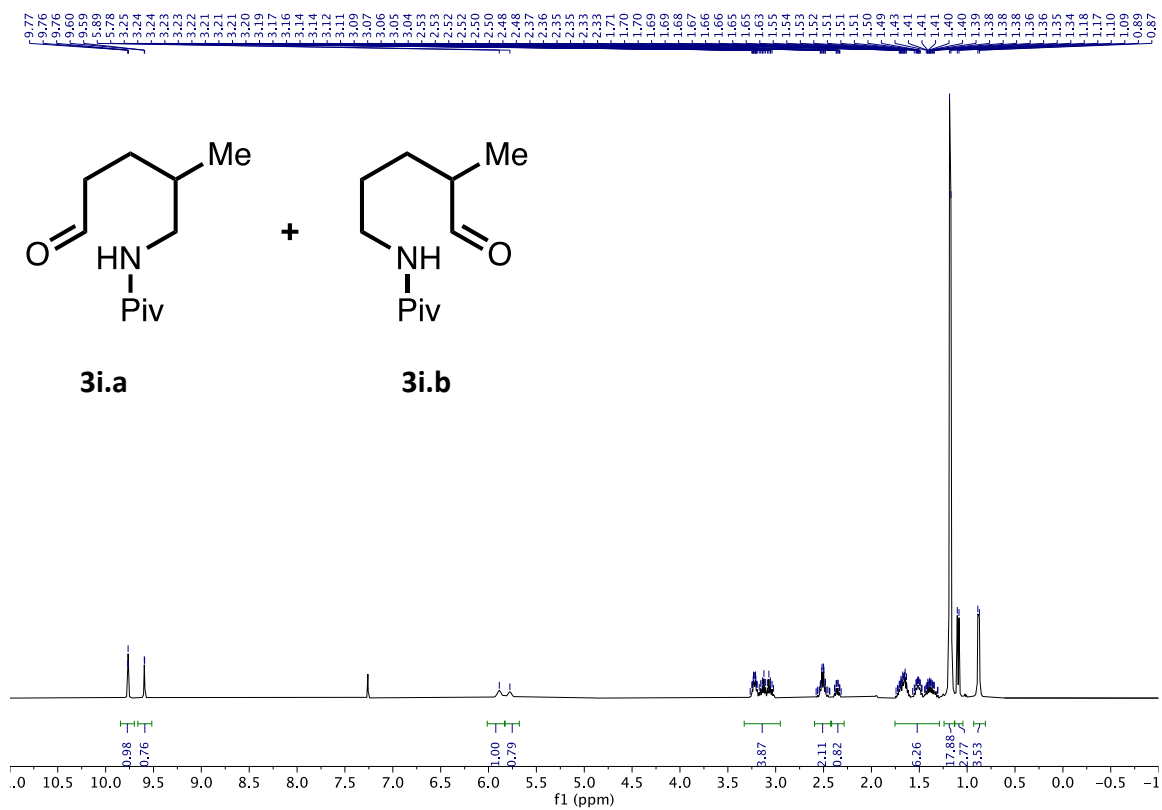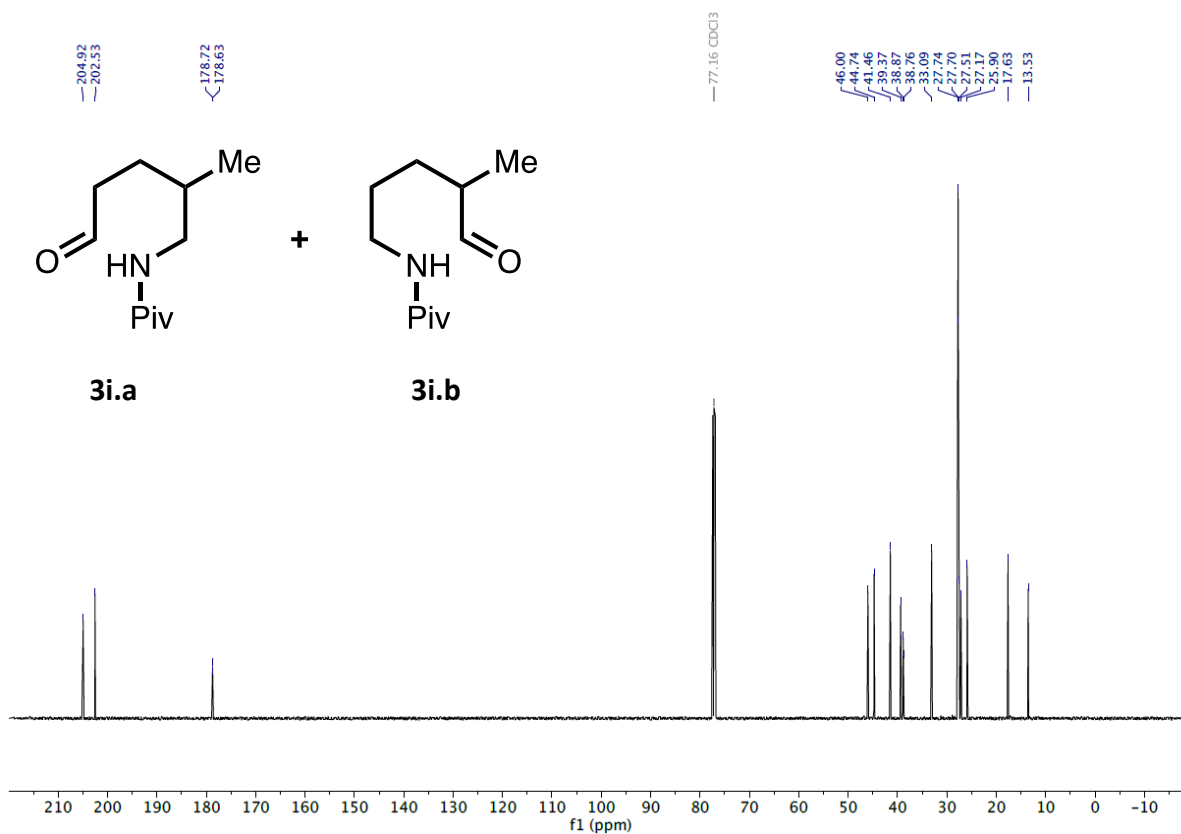

***N*-(5-oxo-2-phenylpentyl)pivalamide and *N*-(5-oxo-4-phenylpentyl)pivalamide**

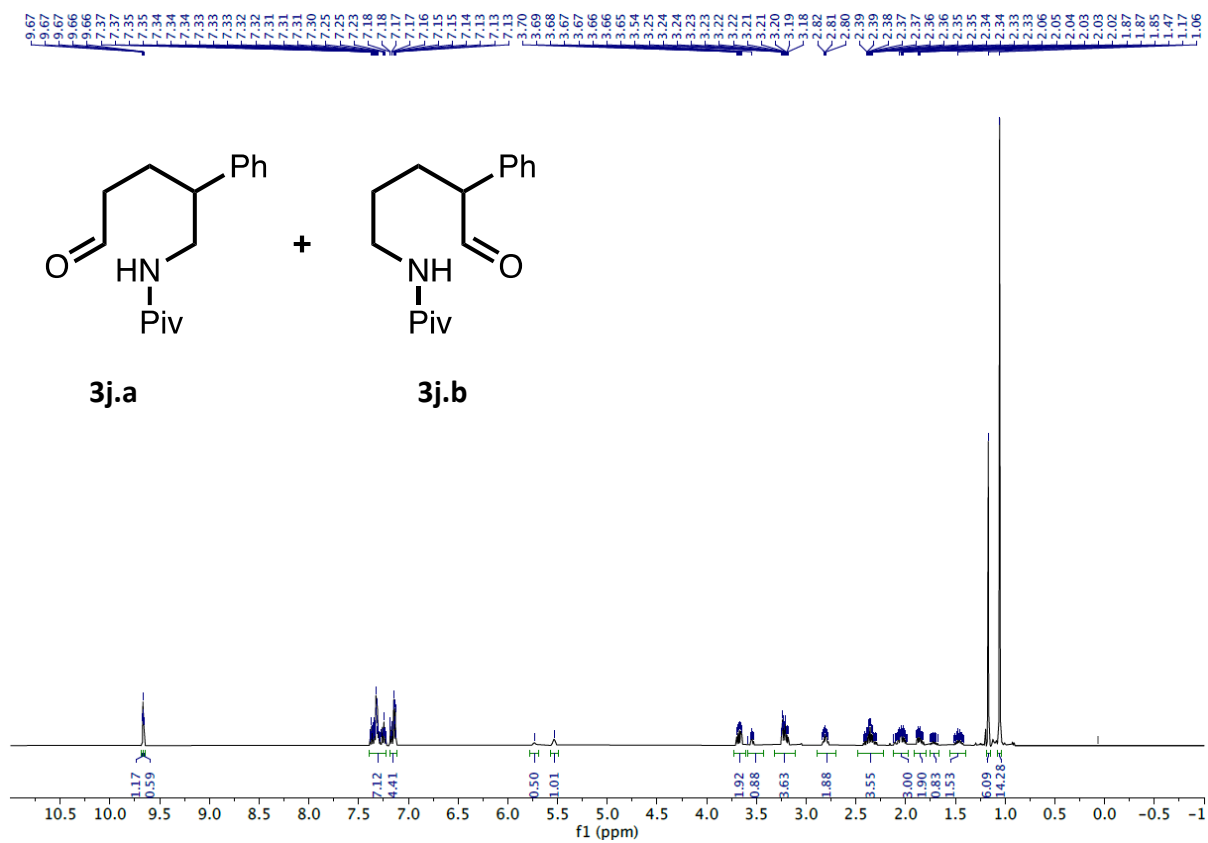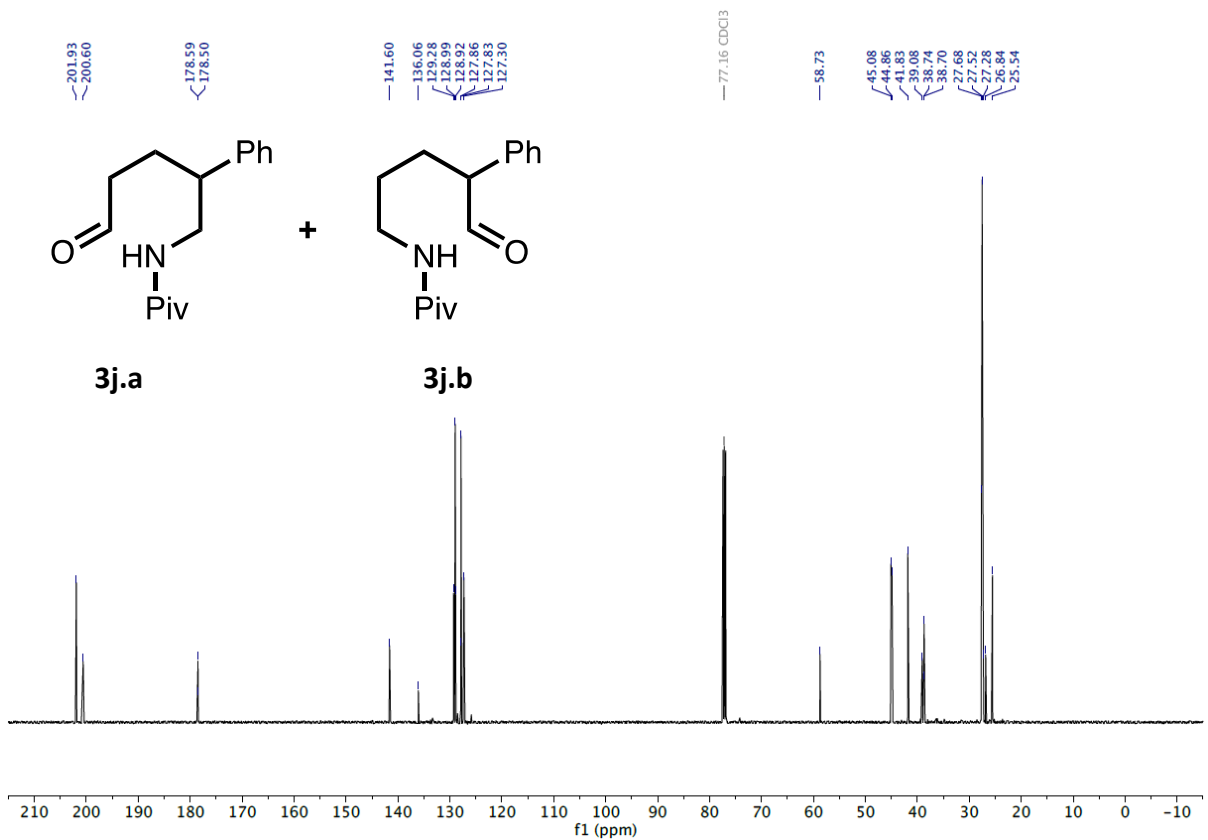

***N*-(2-formylphenethyl)pivalamide**

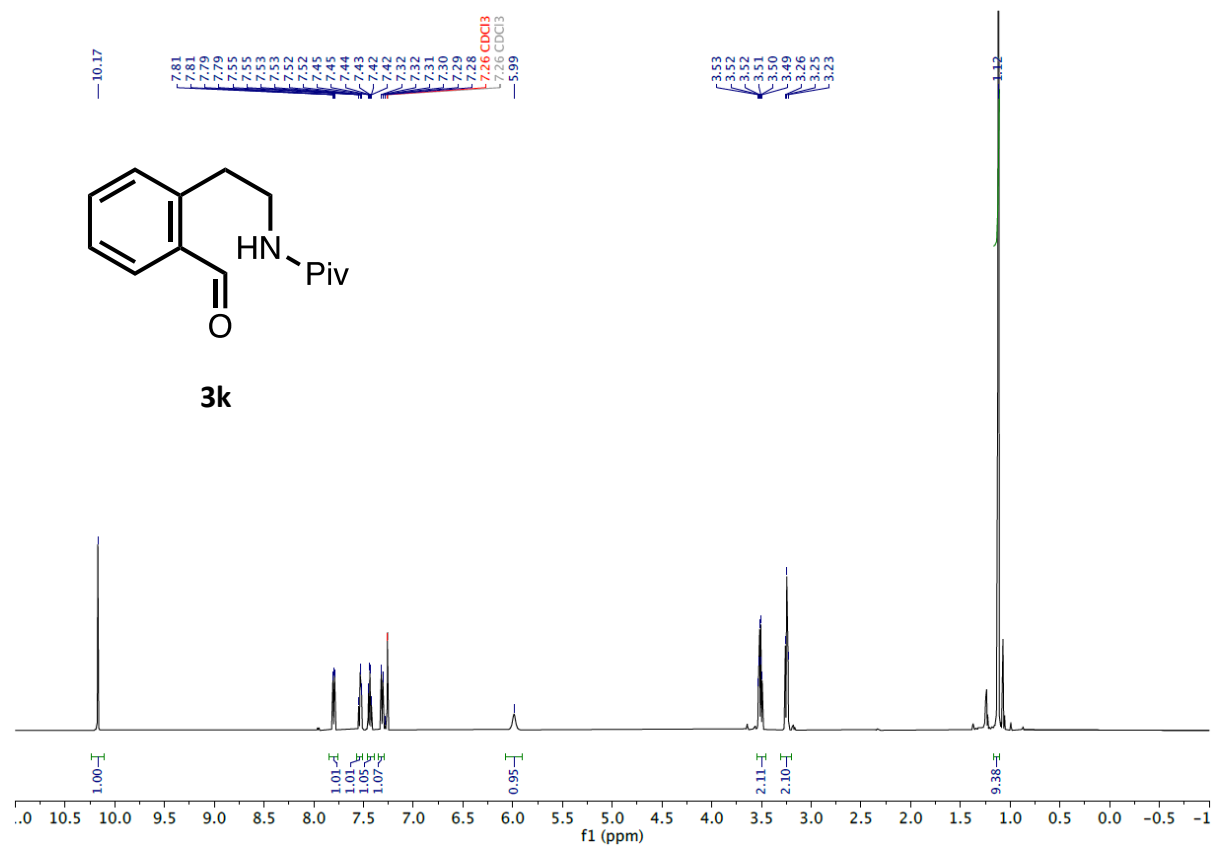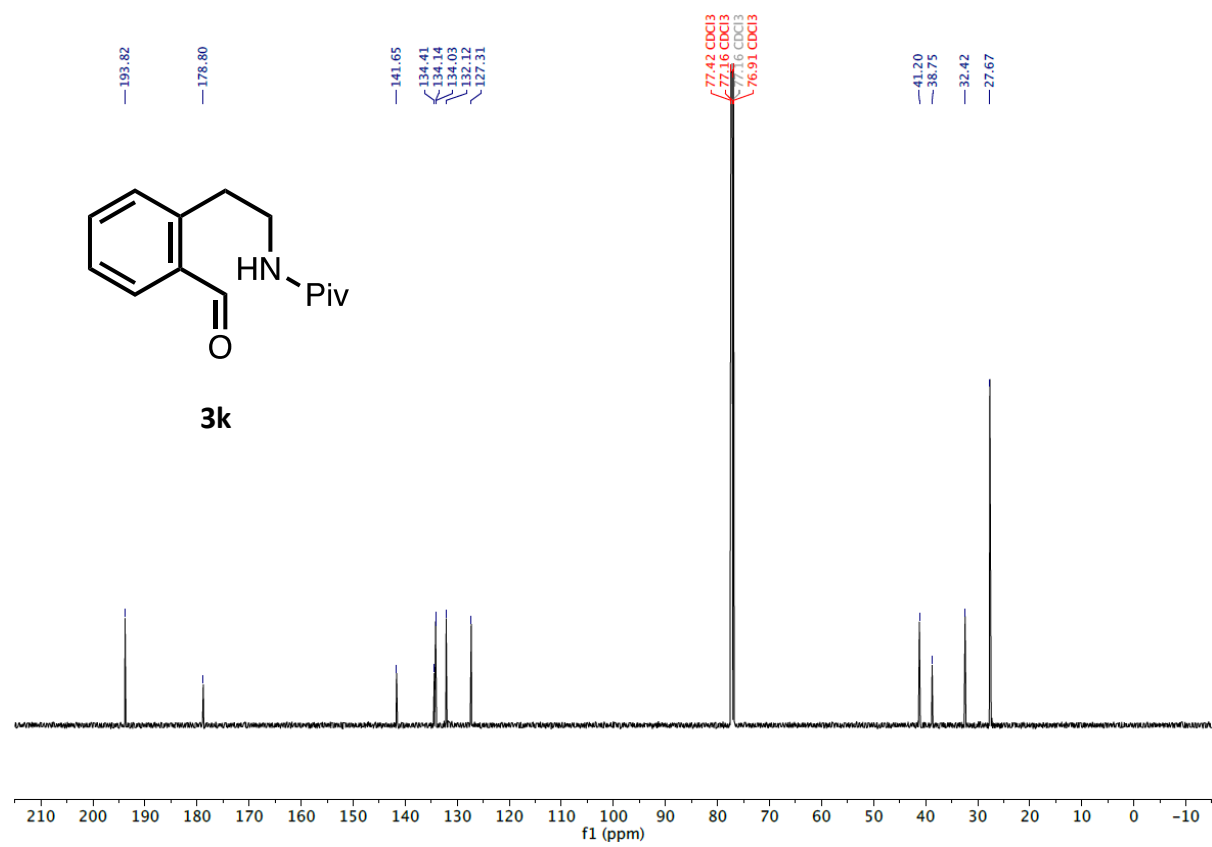

***N*-(2-formyl-4,5-dimethoxyphenethyl)pivalamide**

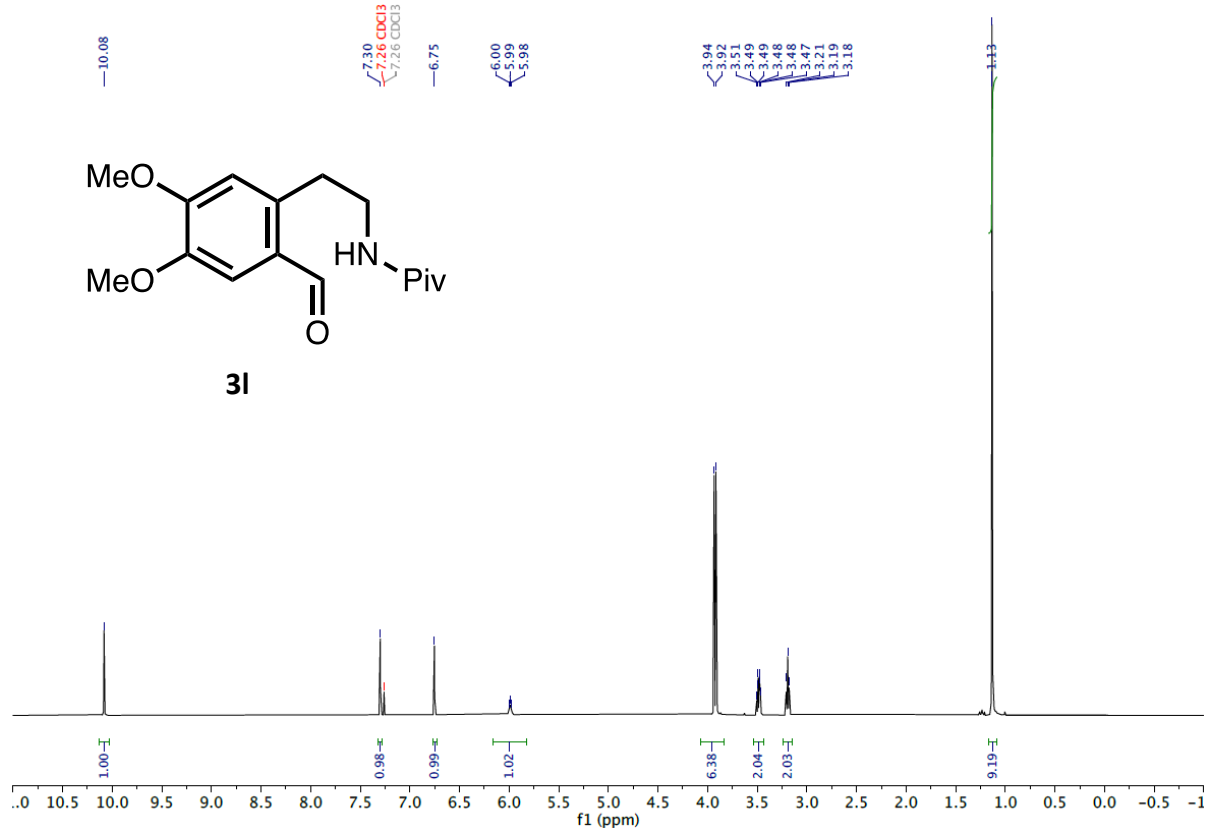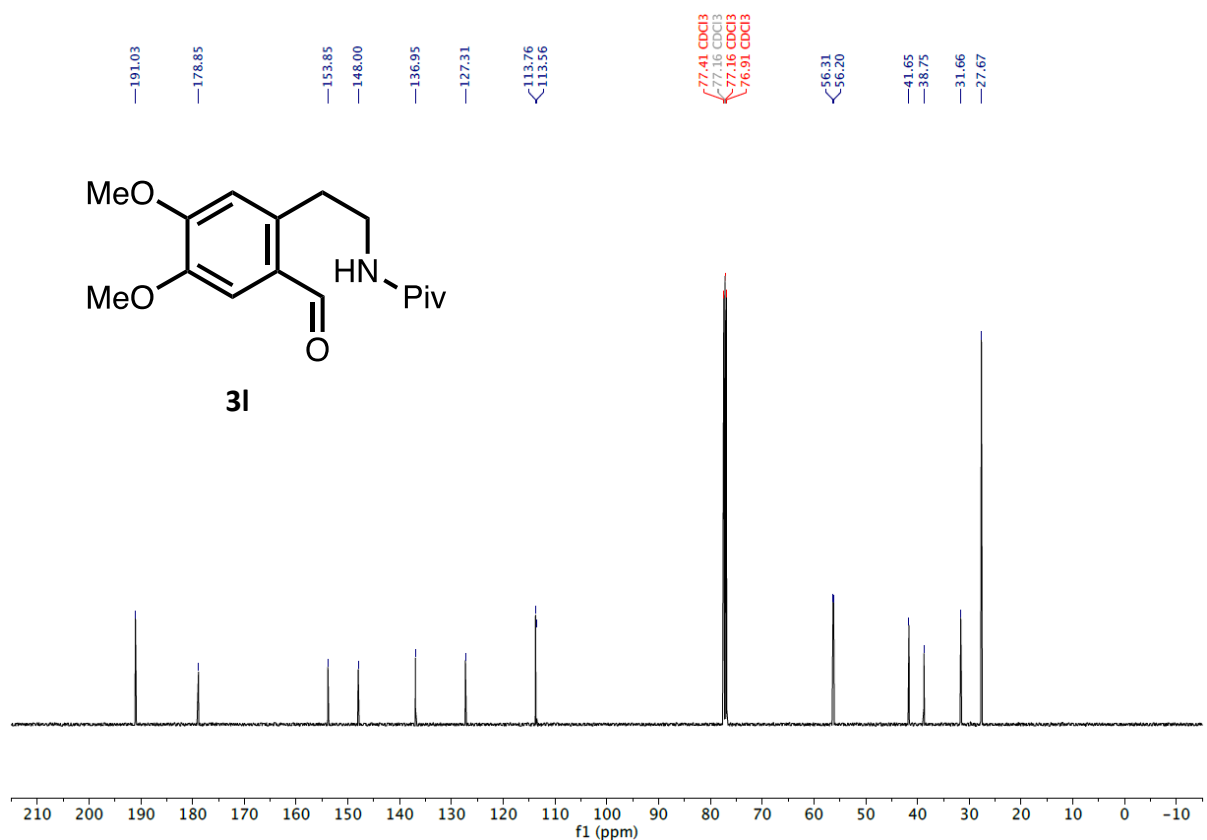

# NMR Spectra – Acid Products

## 7-pivalamidoheptanoic acid

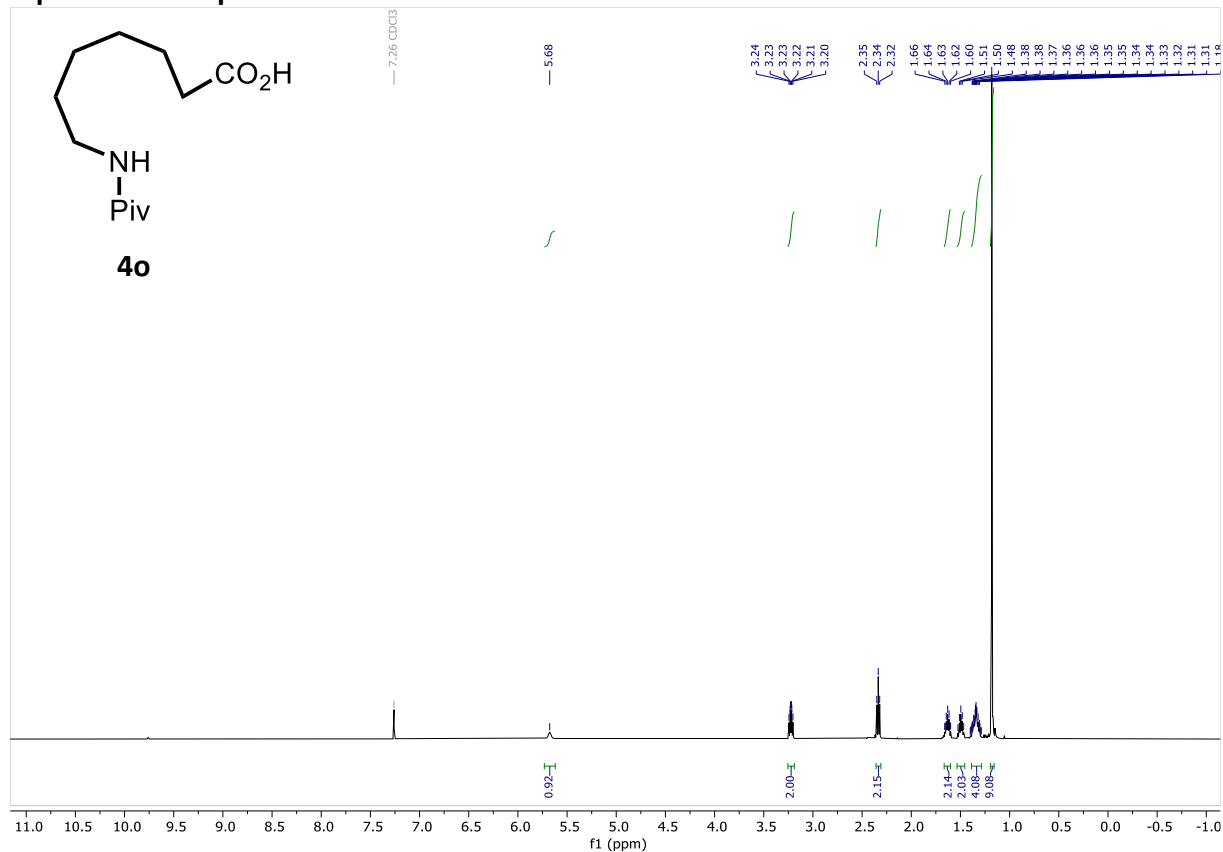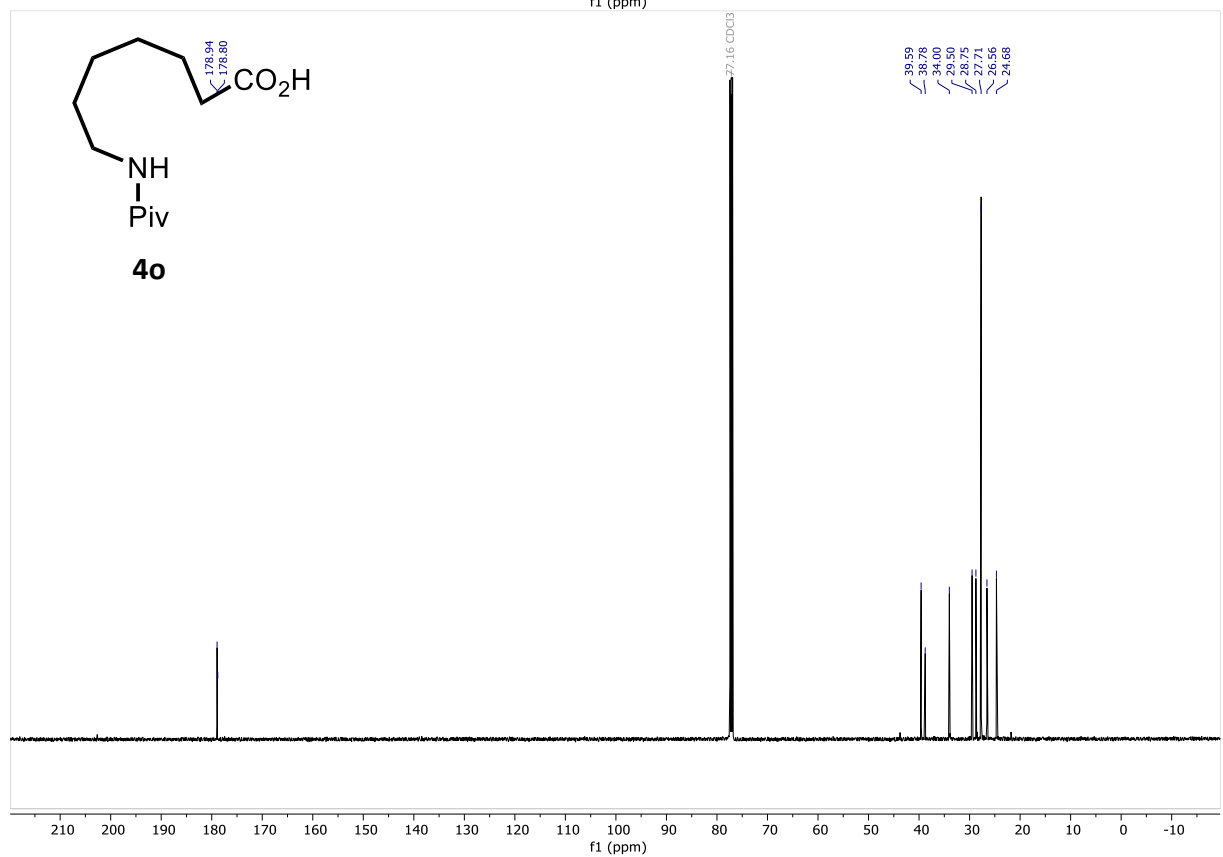





### 3-phenyl-5-pivalamidopentanoic acid

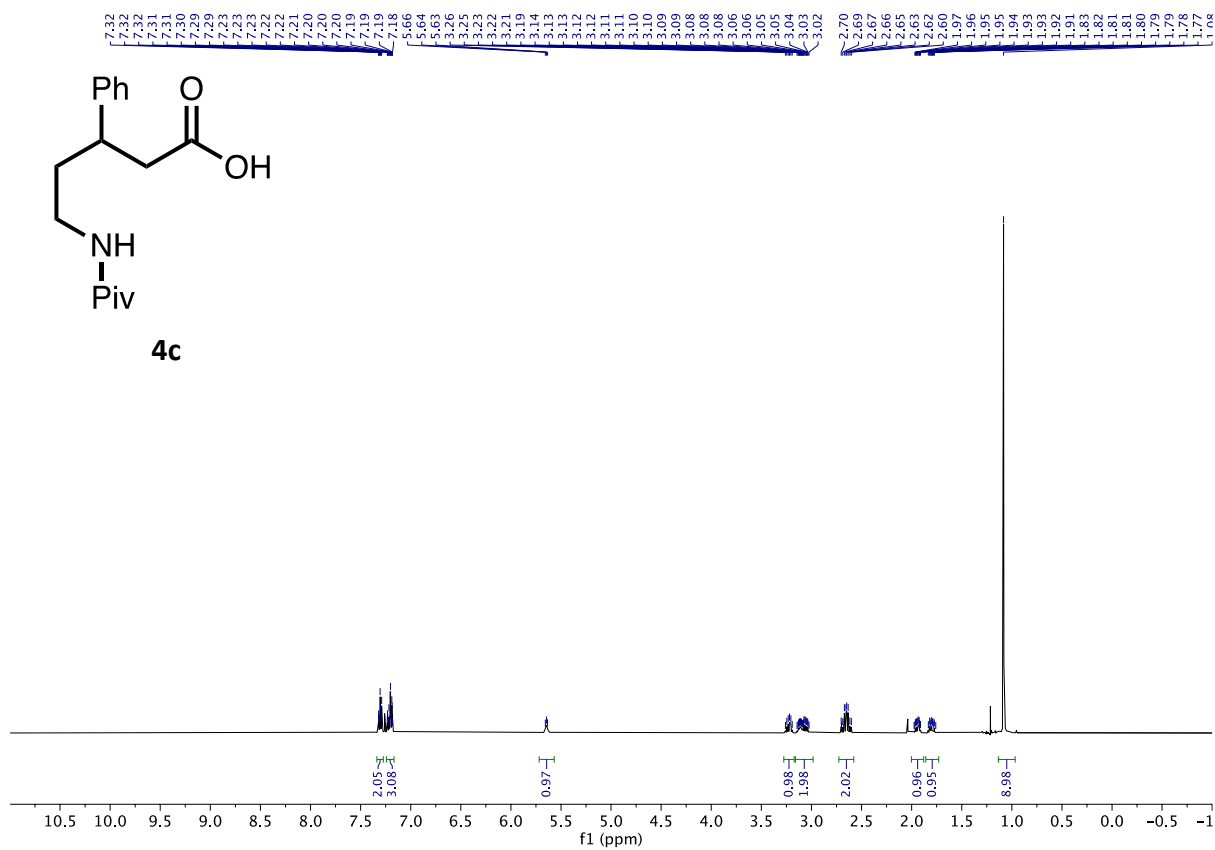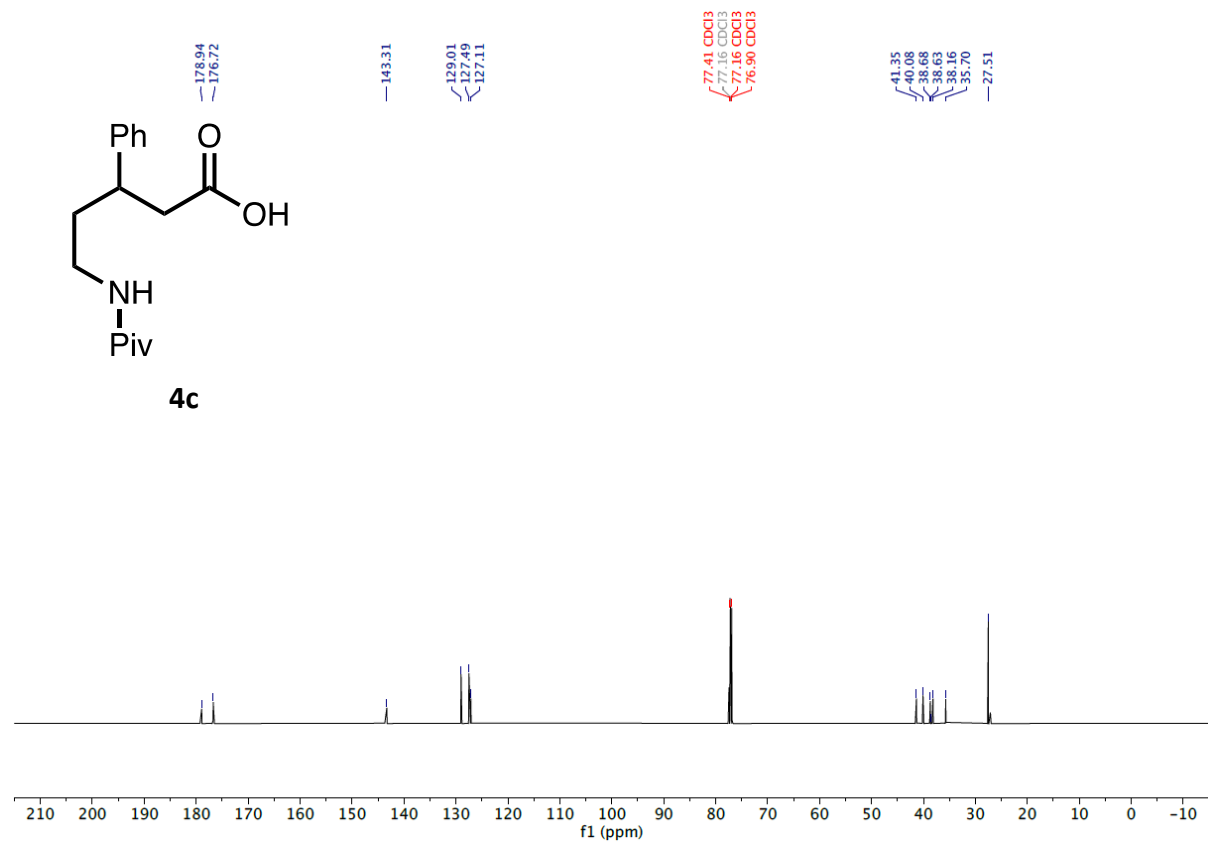



### 3-(ethoxycarbonyl)-5-pivalamidopentanoic acid

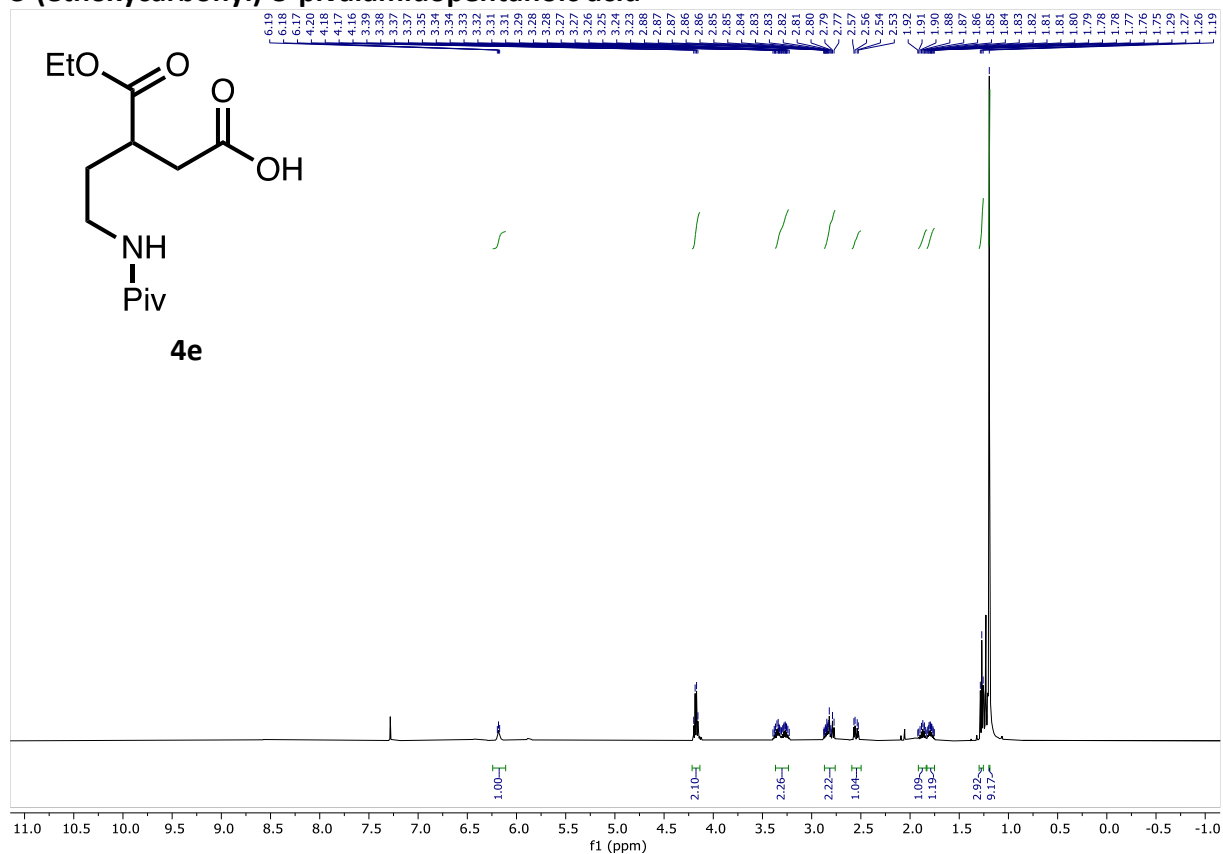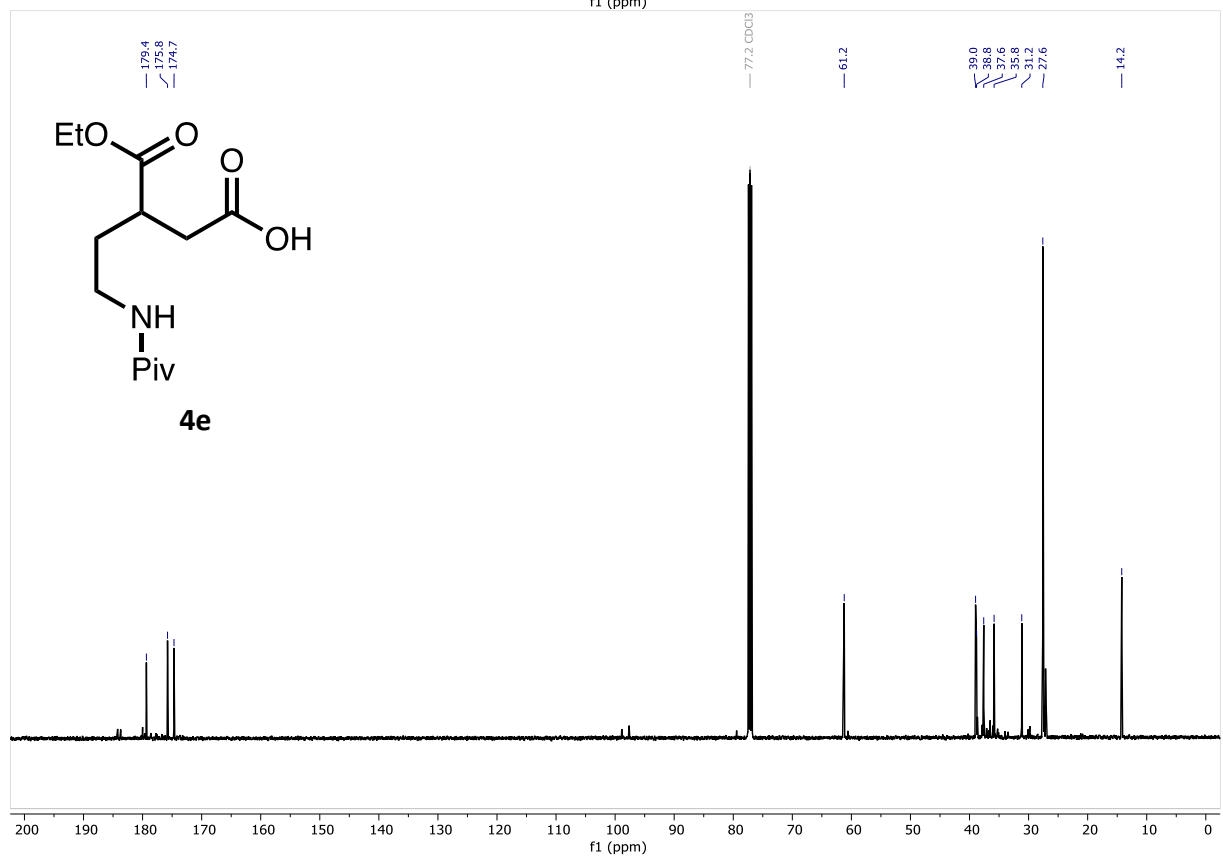

5-methoxy-5-oxo-3-(2-pivalamidoethyl)pentanoic acid

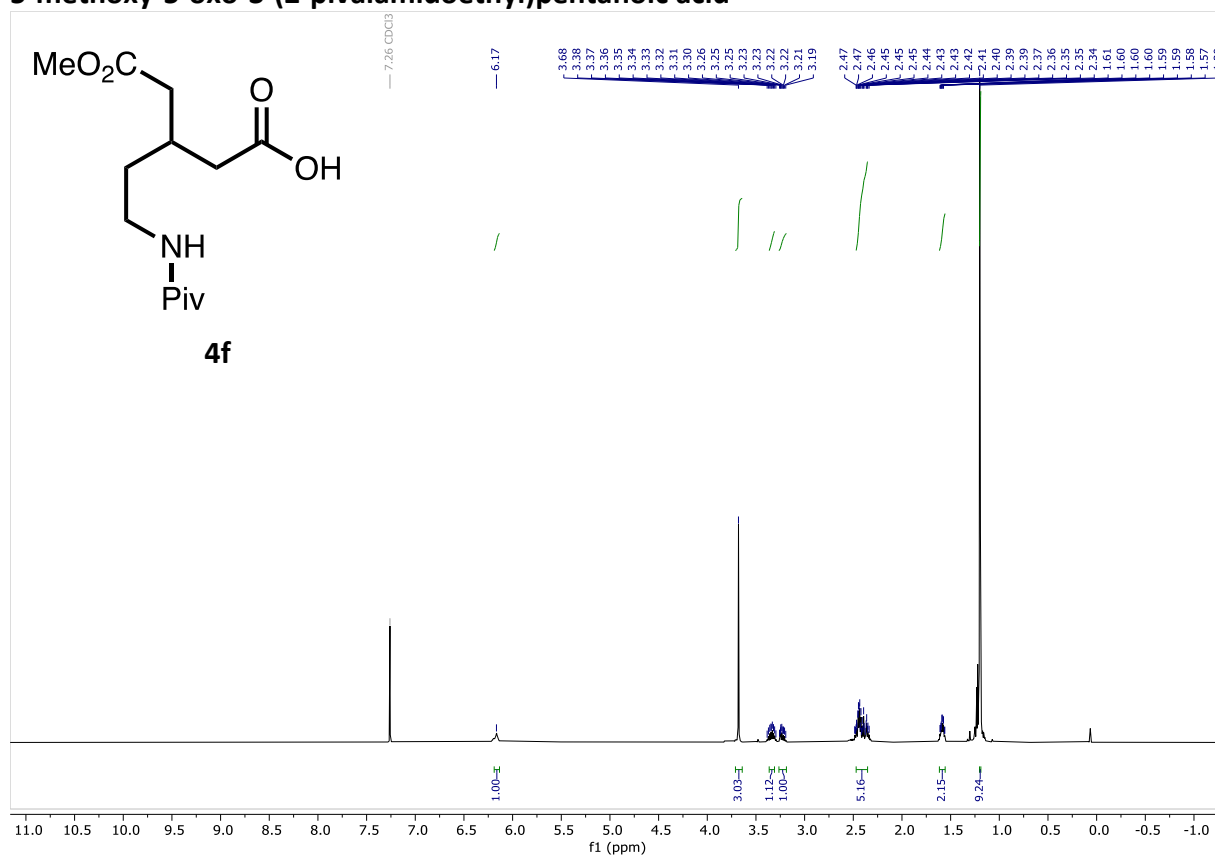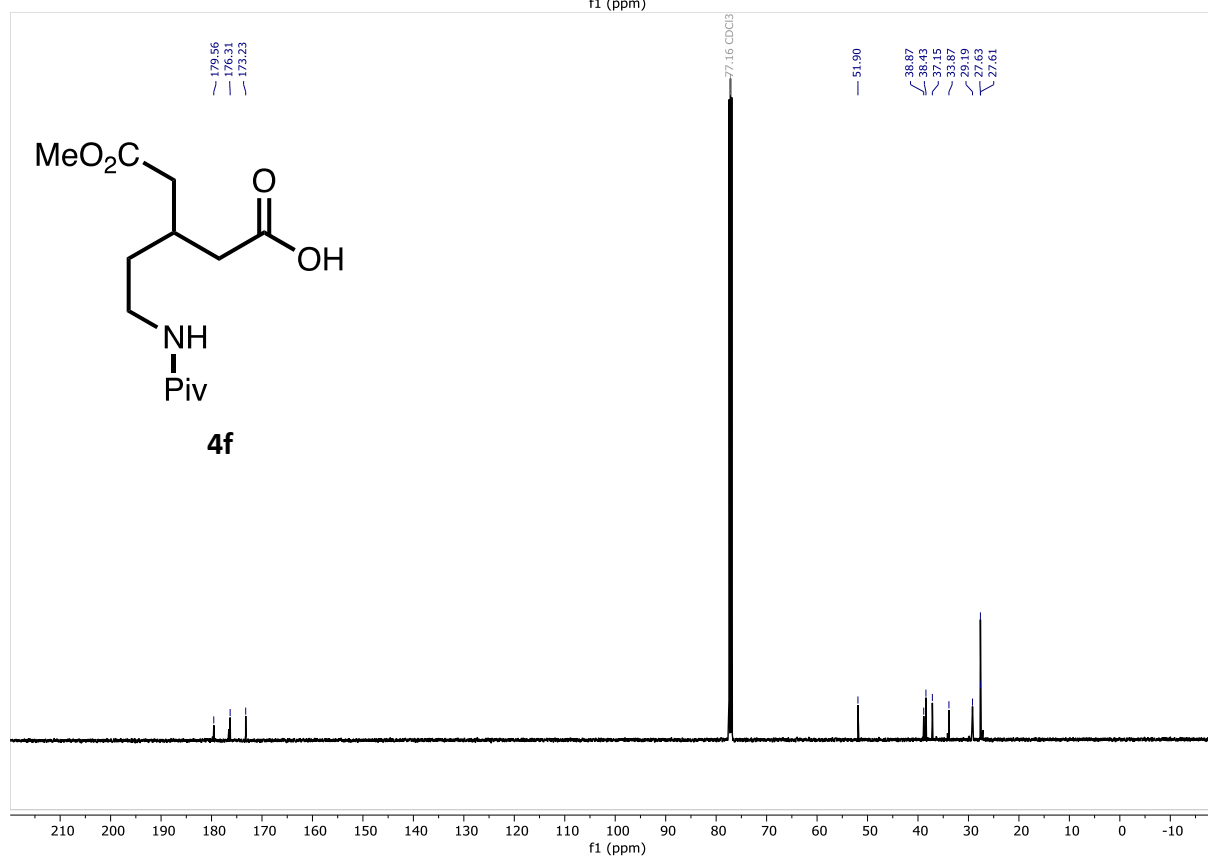

## 2,4-dimethyl-5-pivalamidopentanoic acid

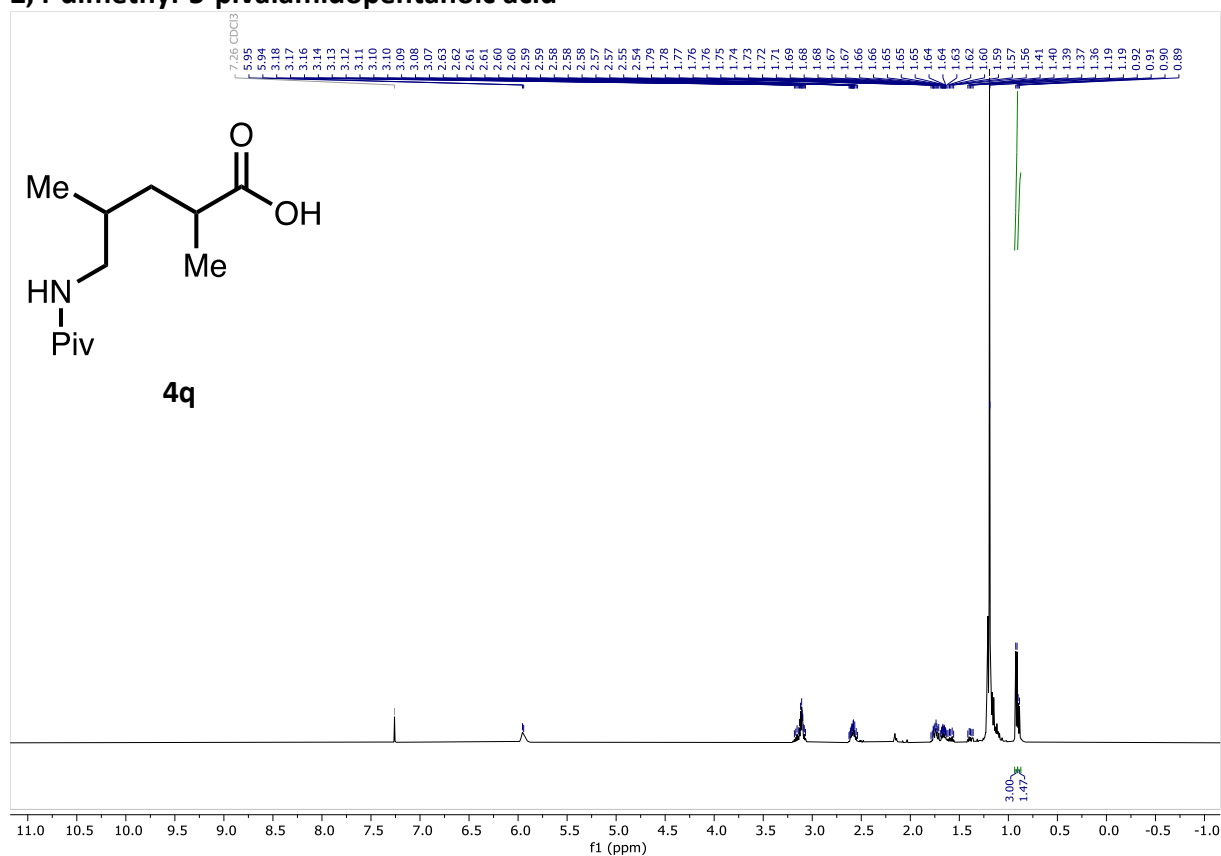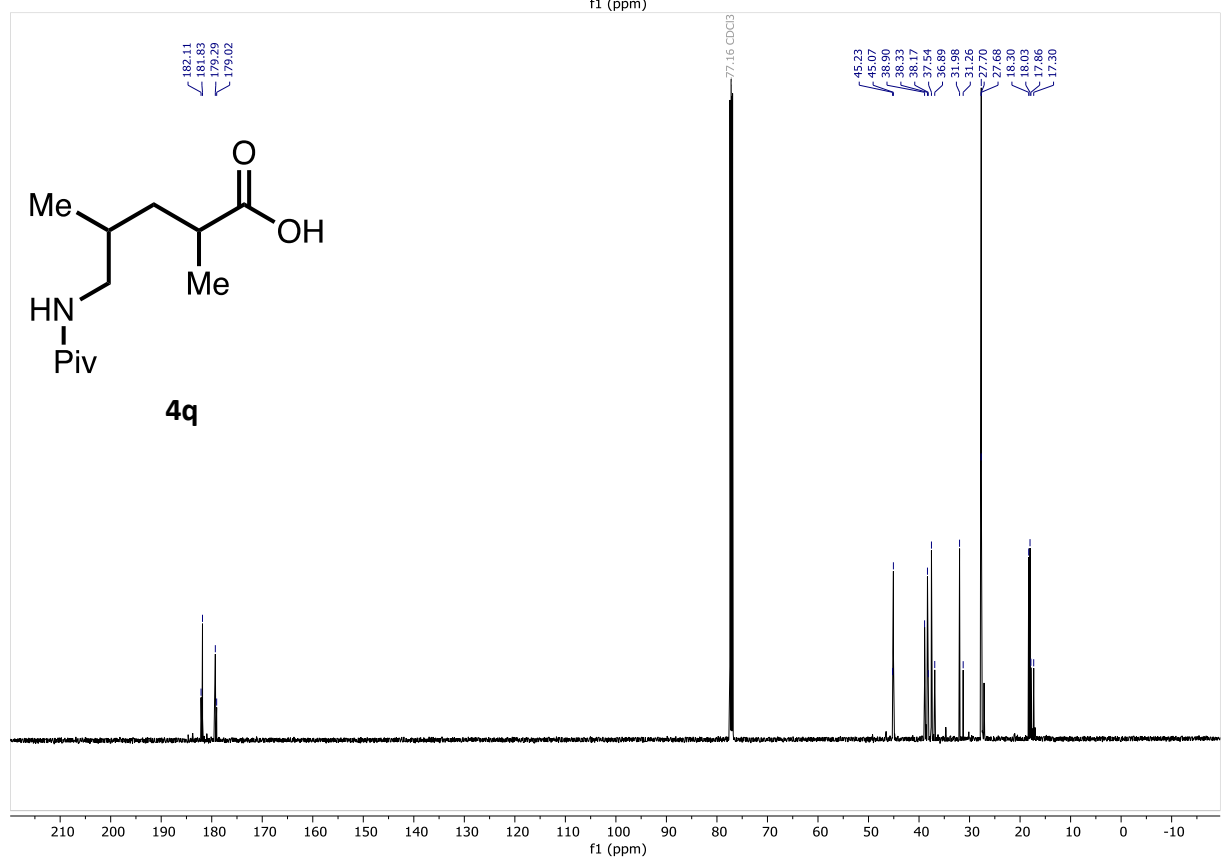

### 3-(2-pivalamidocyclohexyl)propanoic acid

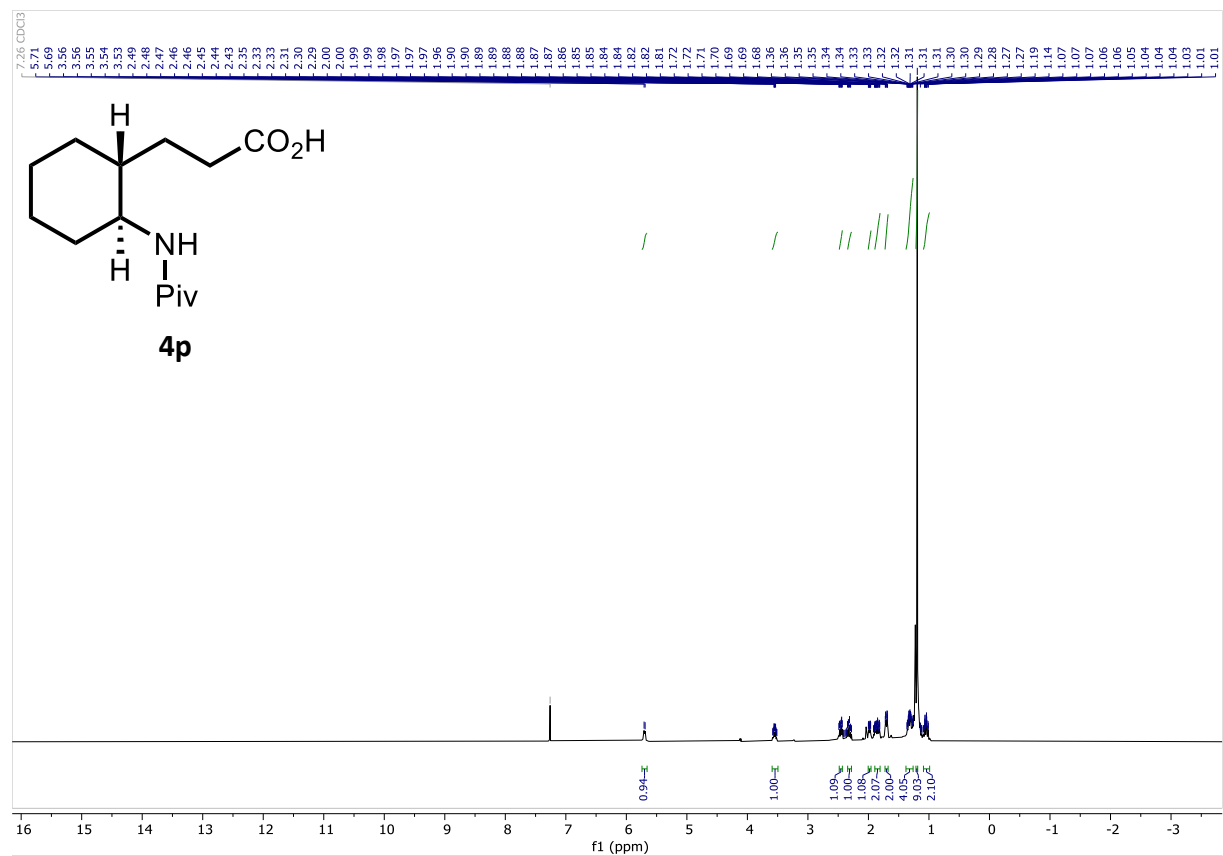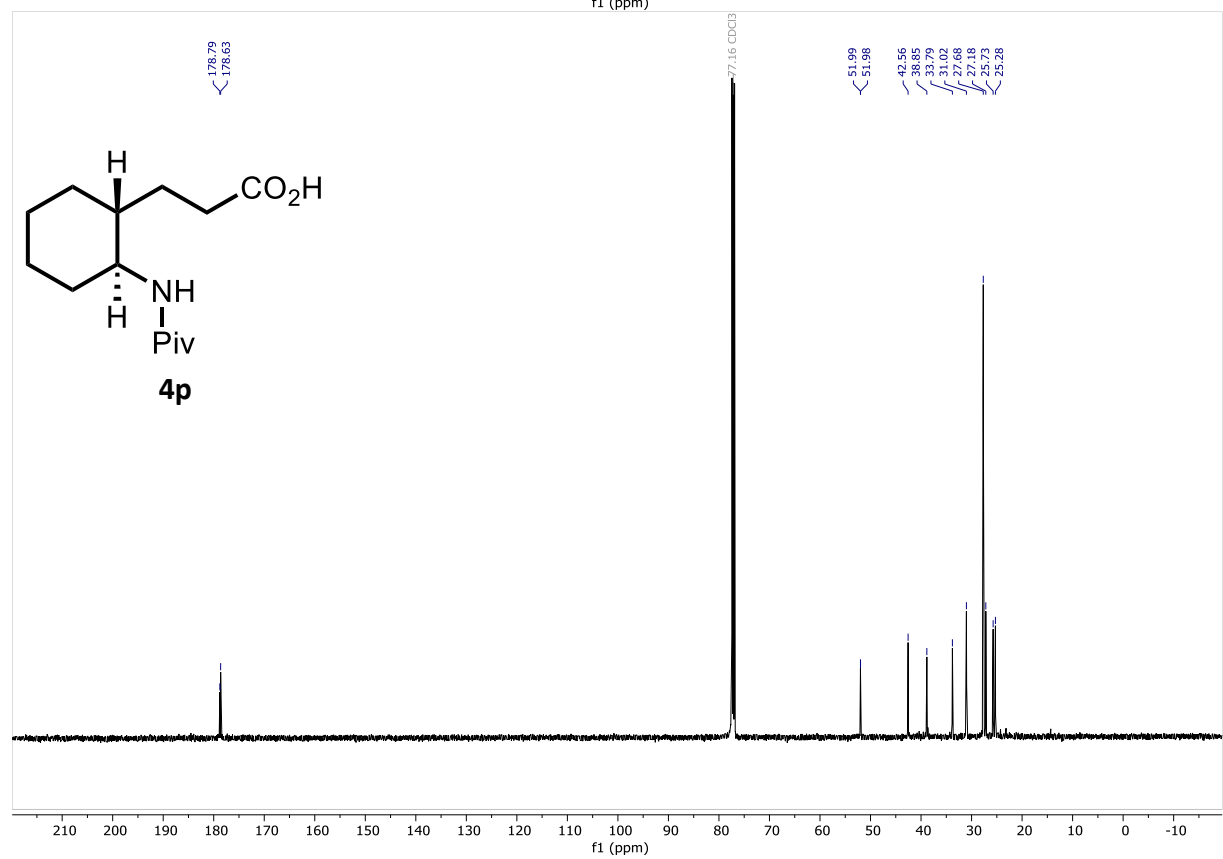

### (S)-6-methoxy-6-oxo-5-pivalamidohexanoic acid

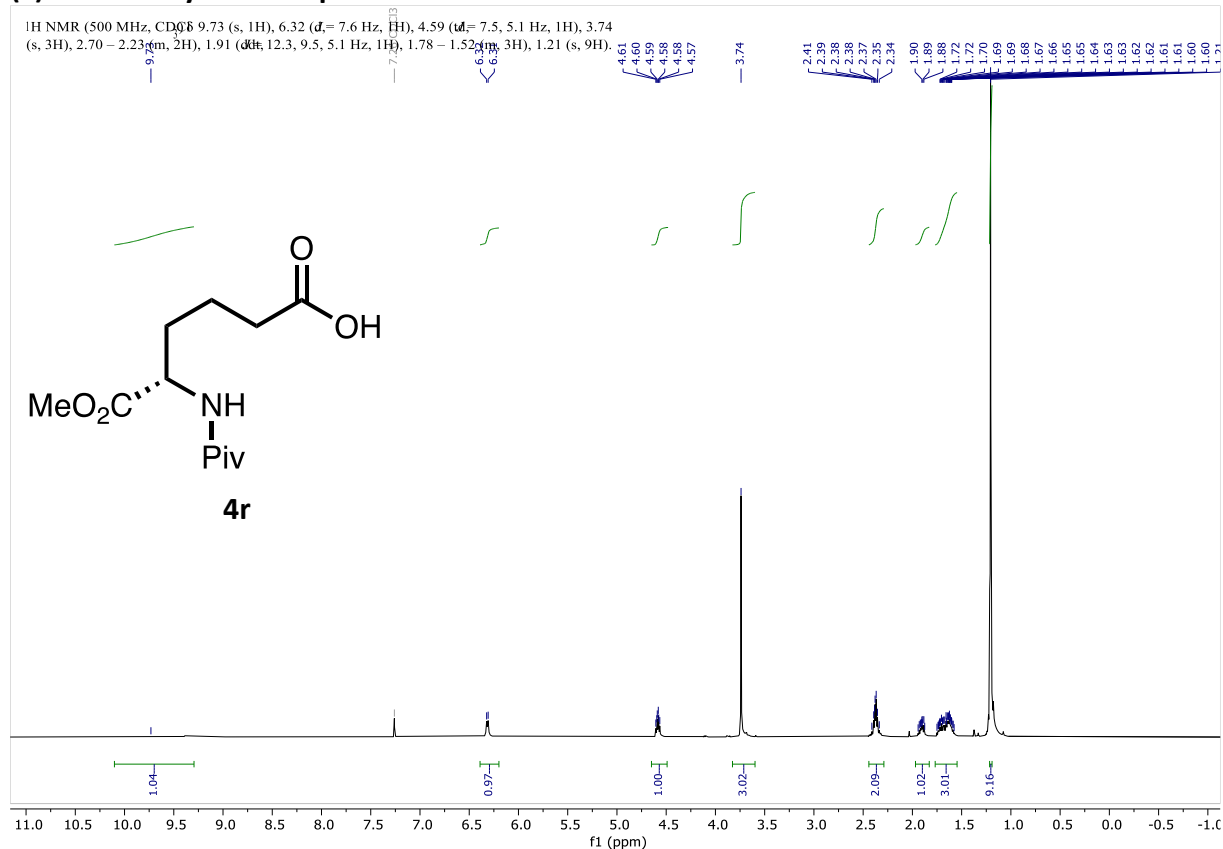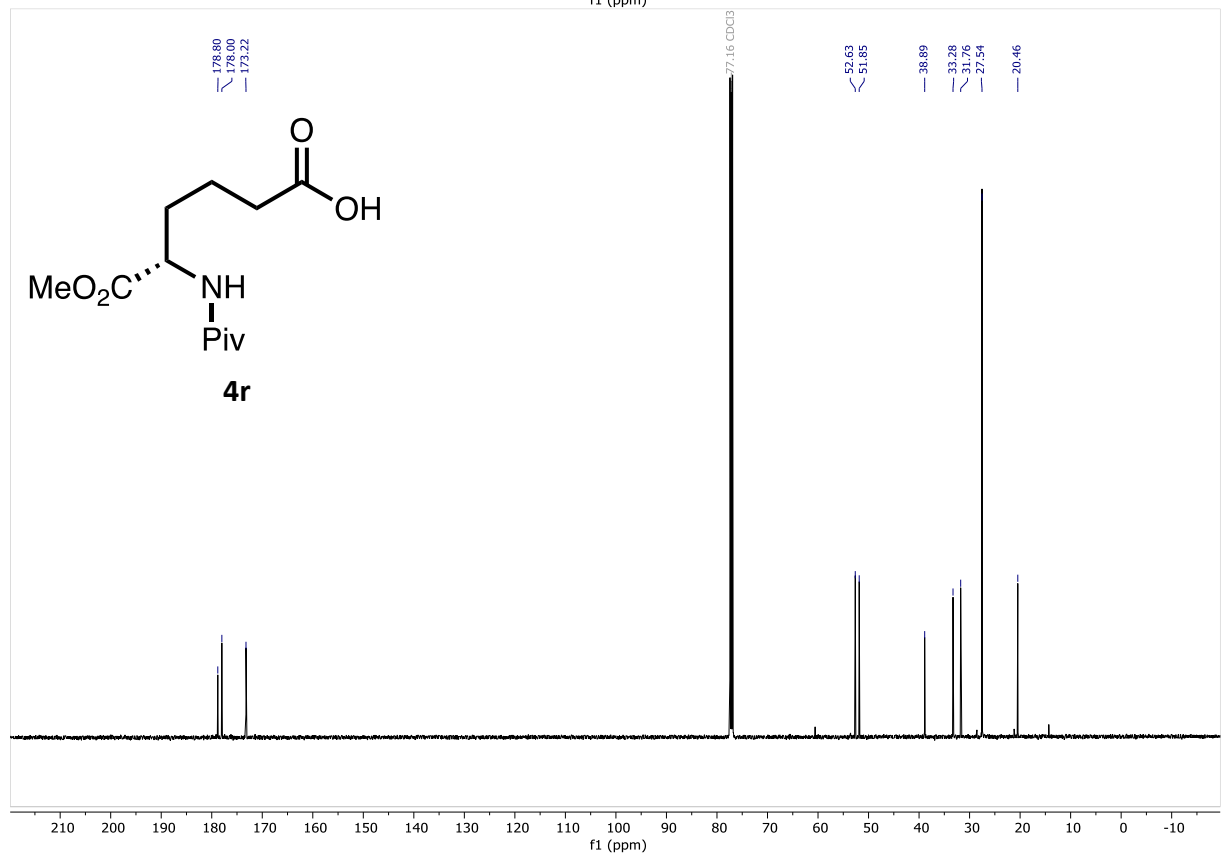

**(S)-5-methoxy-5-oxo-4-pivalamidopentanoic acid**

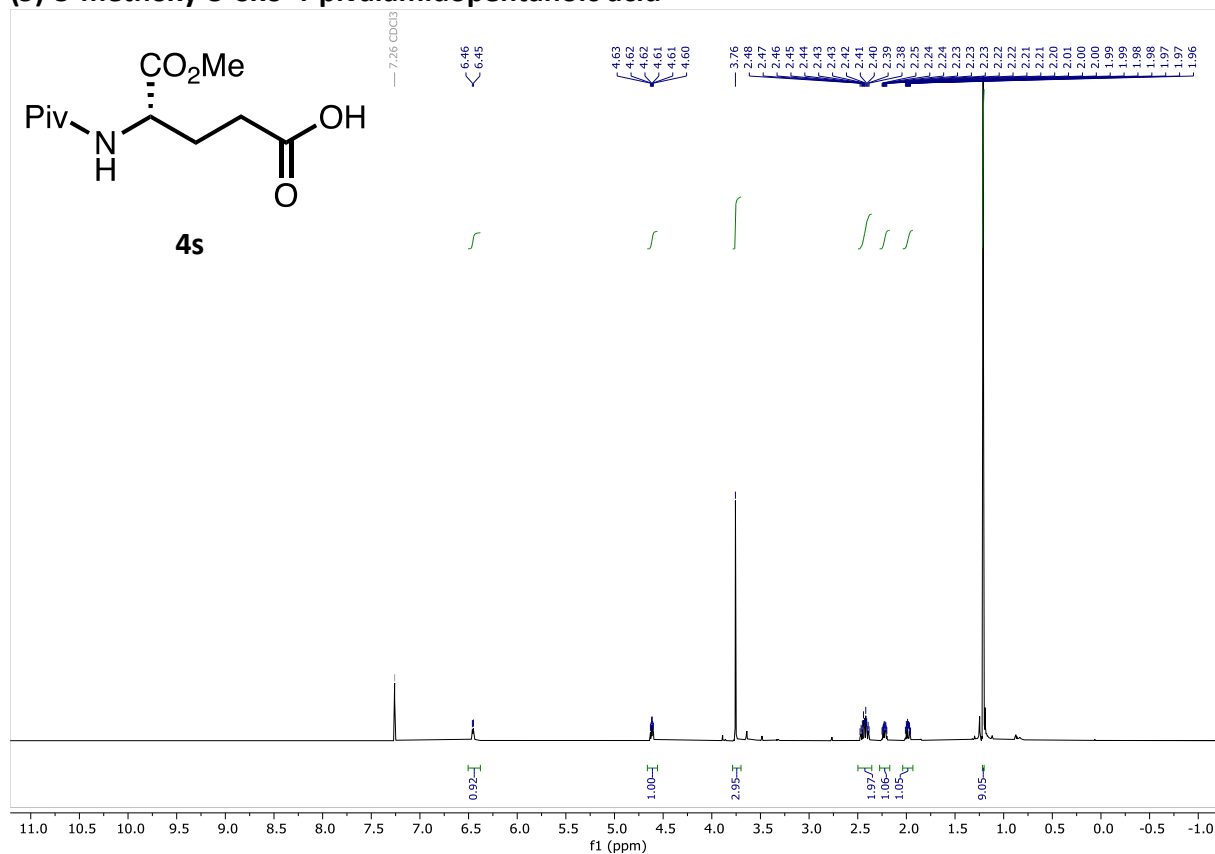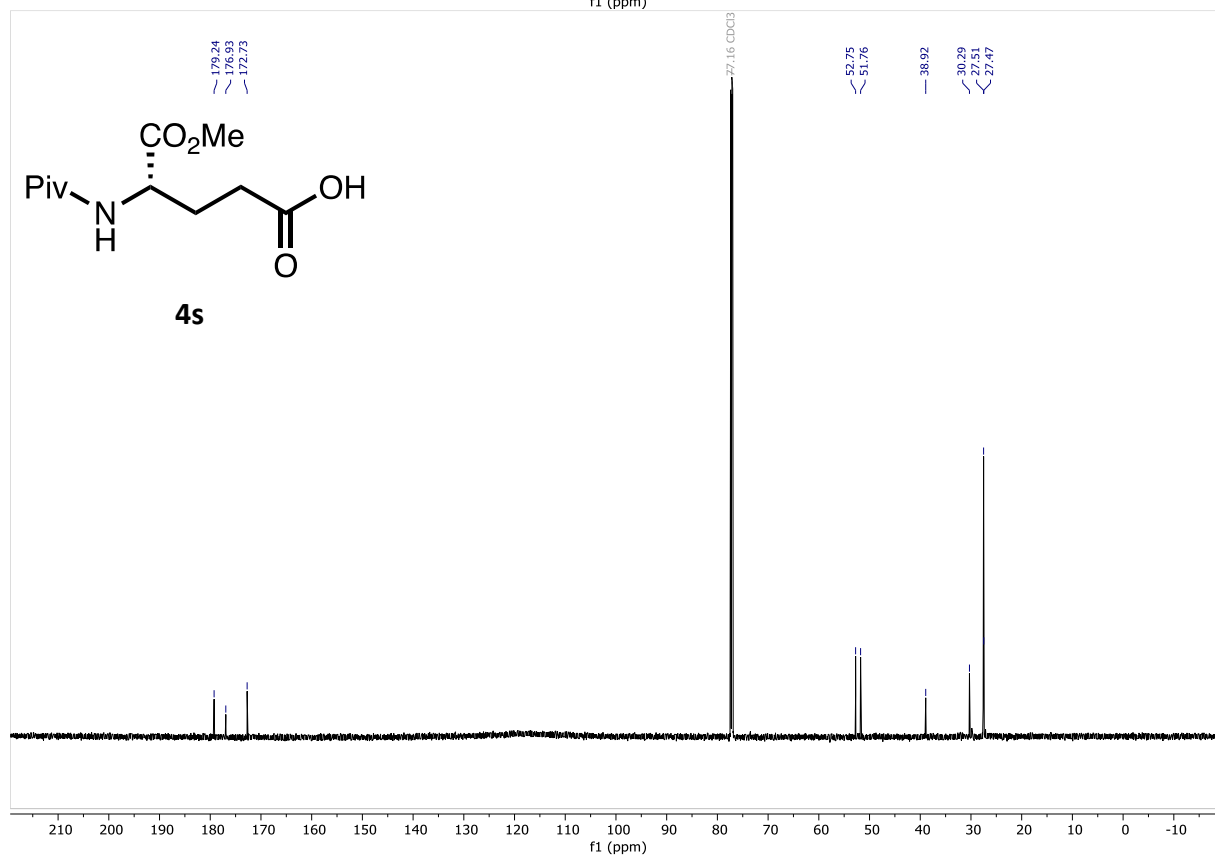



***N*-(5-oxo-5-phenylpentyl)pivalamide**

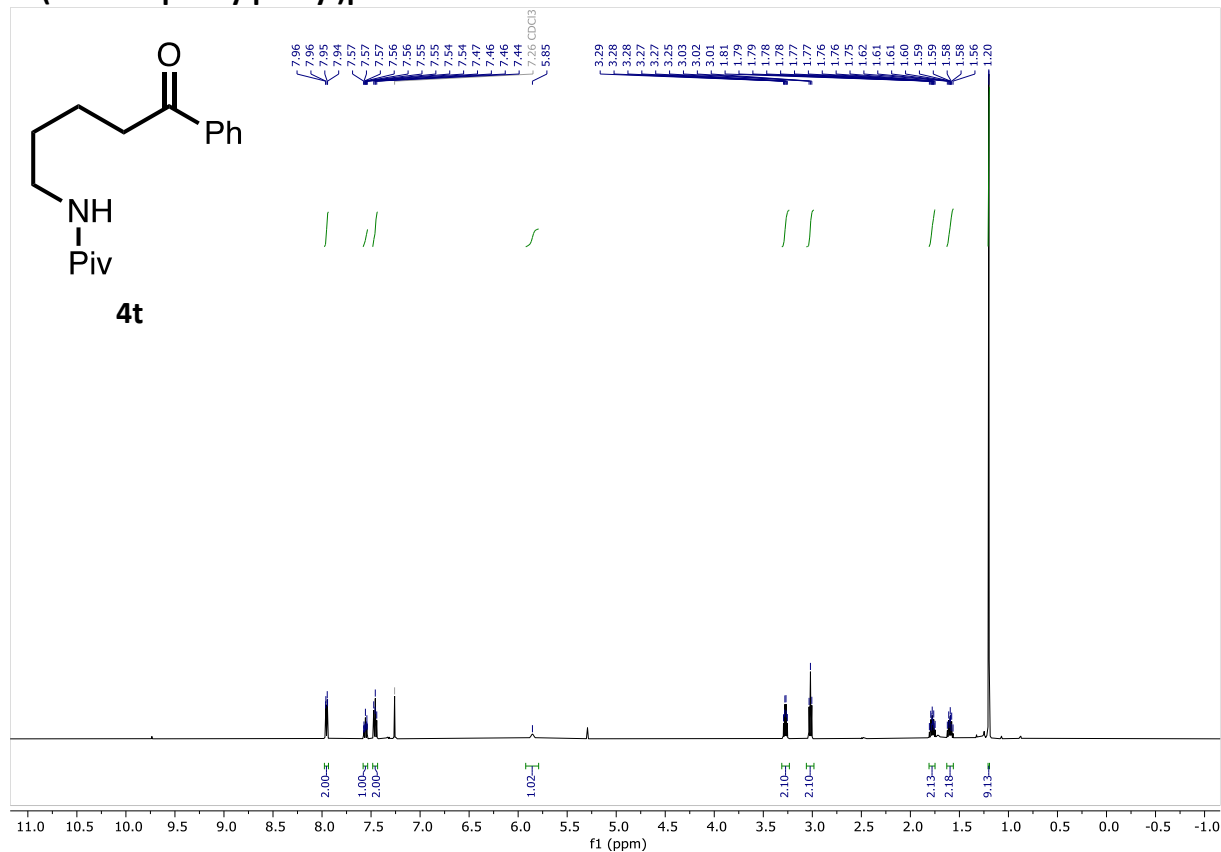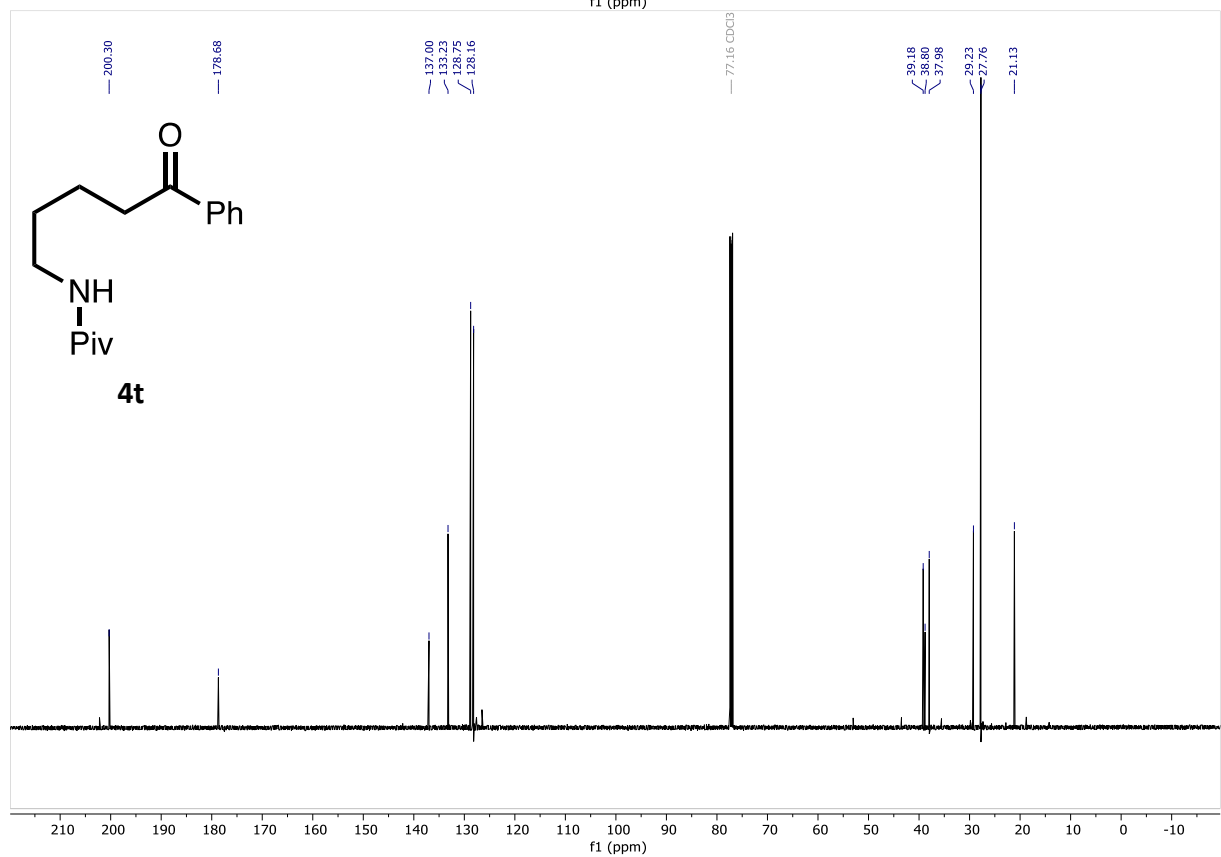

# 5-oxo-5-phenylpentanoic acid

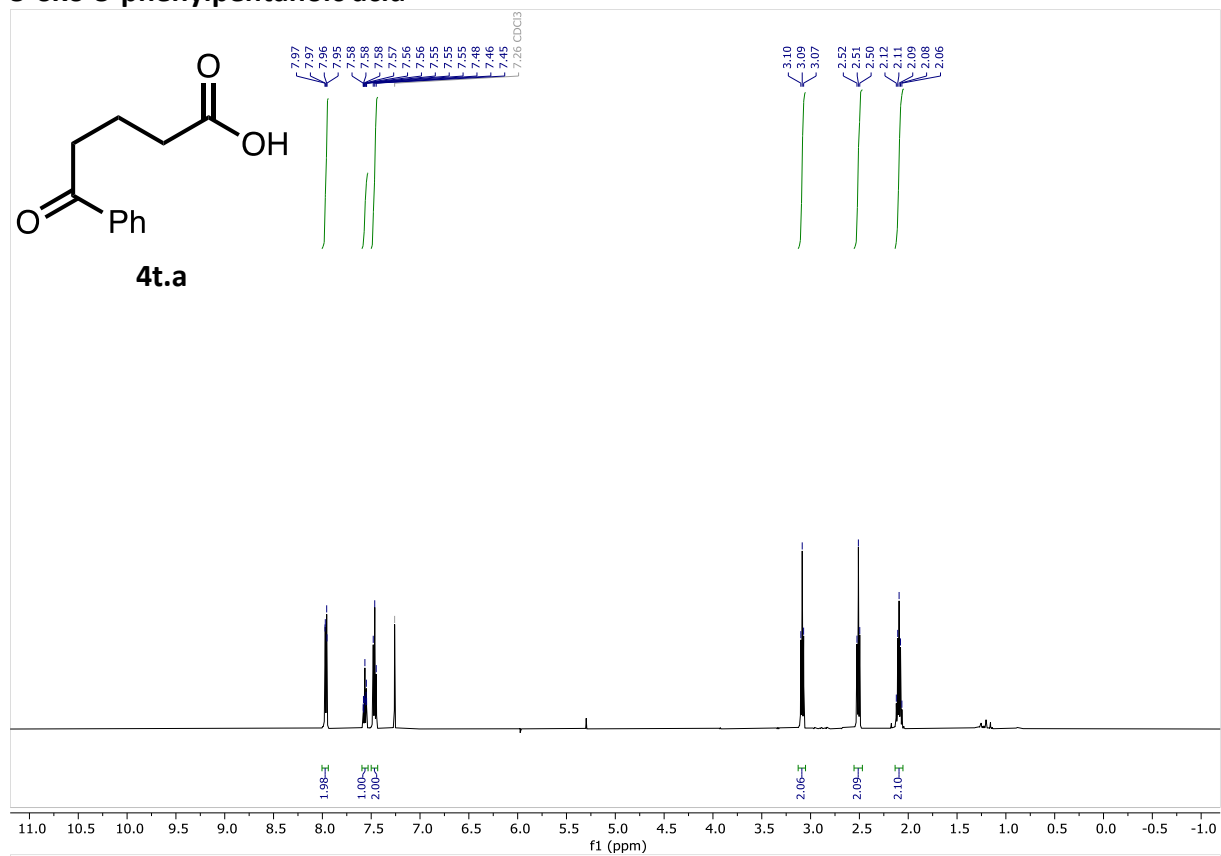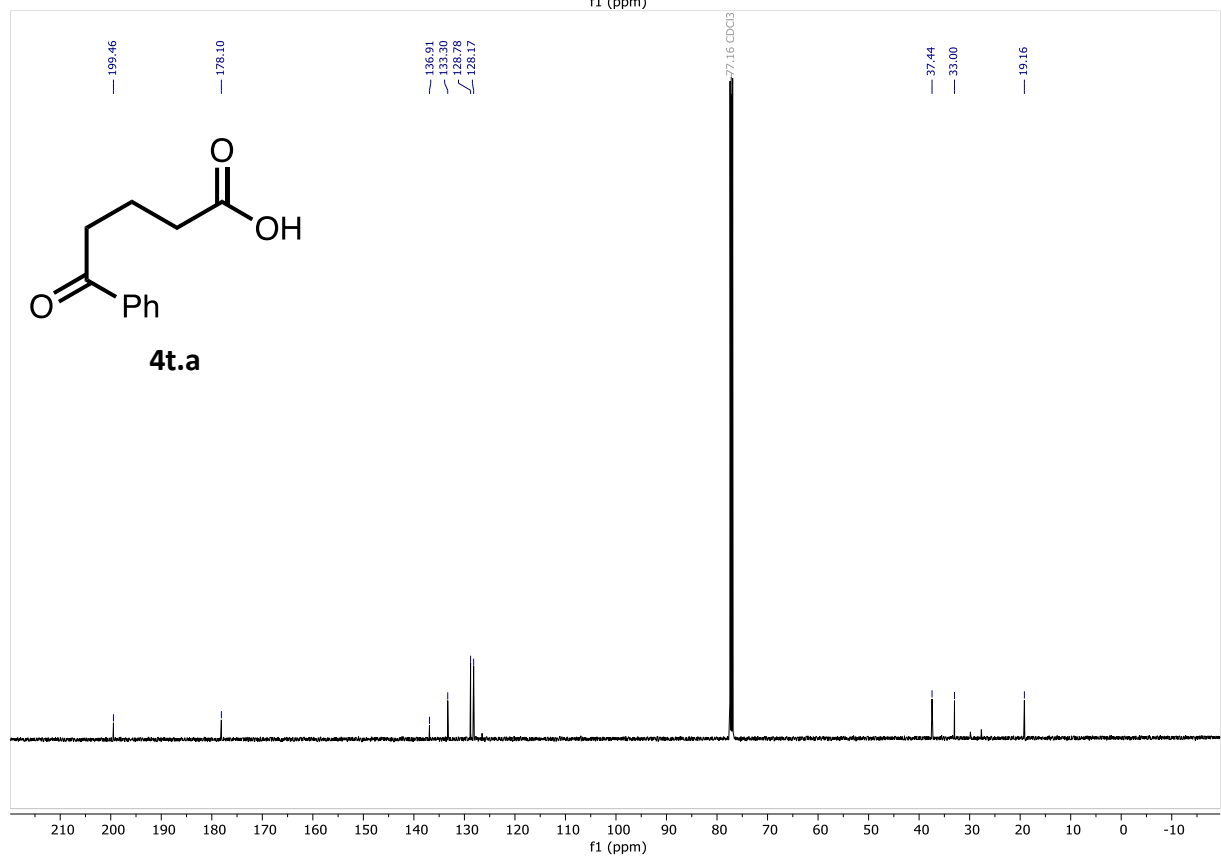

### 5-oxo-5-phenylpentanoic acid

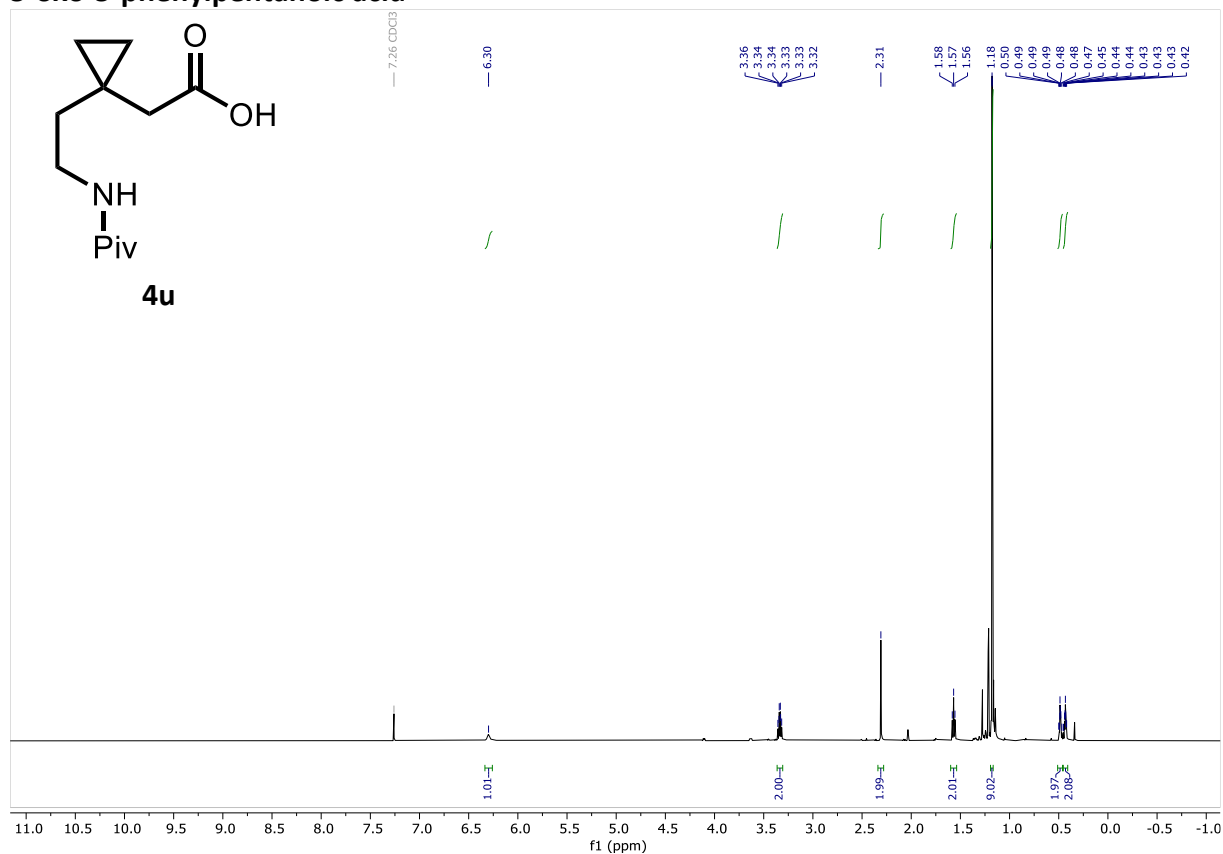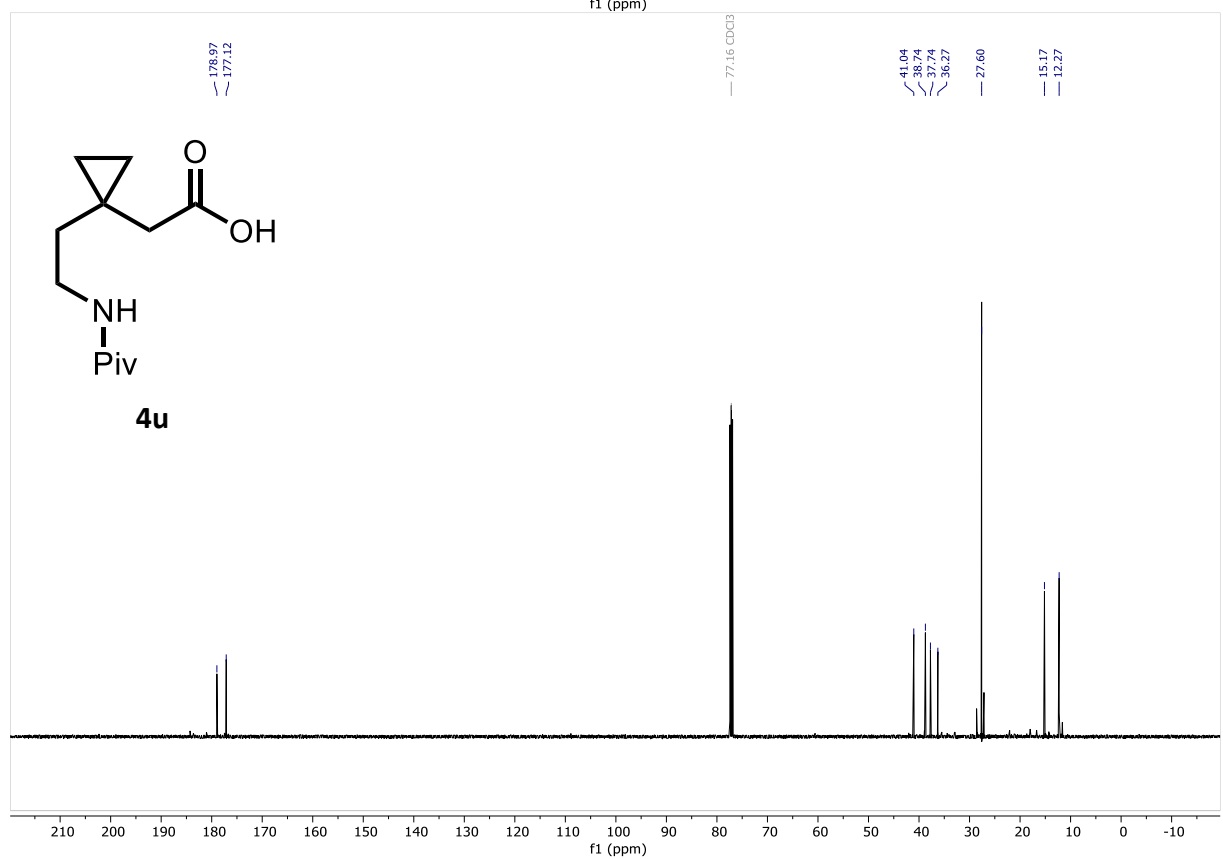

**(4S)-5-(((3R)-3-(tert-butoxy)-1-methoxy-1-oxobutan-2-yl)amino)-5-oxo-4-pivalamidopentanoic acid**

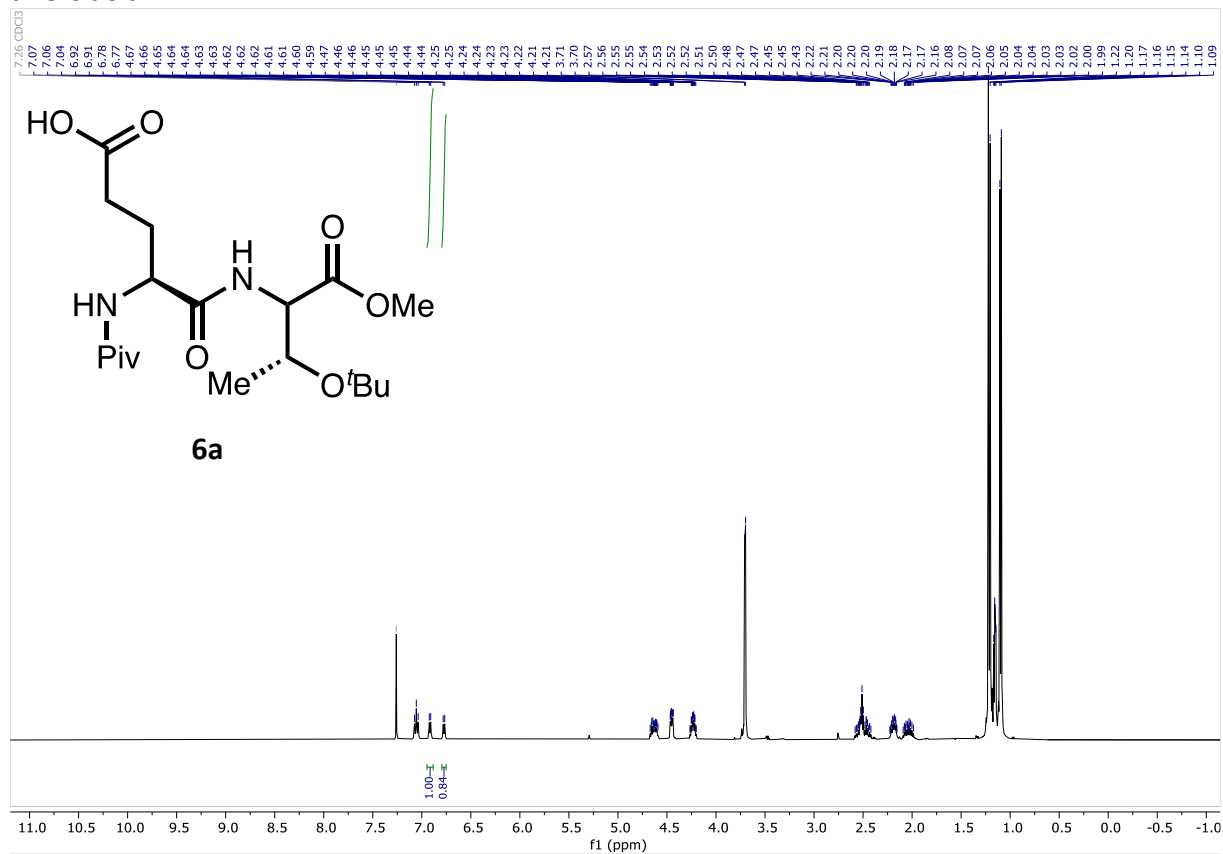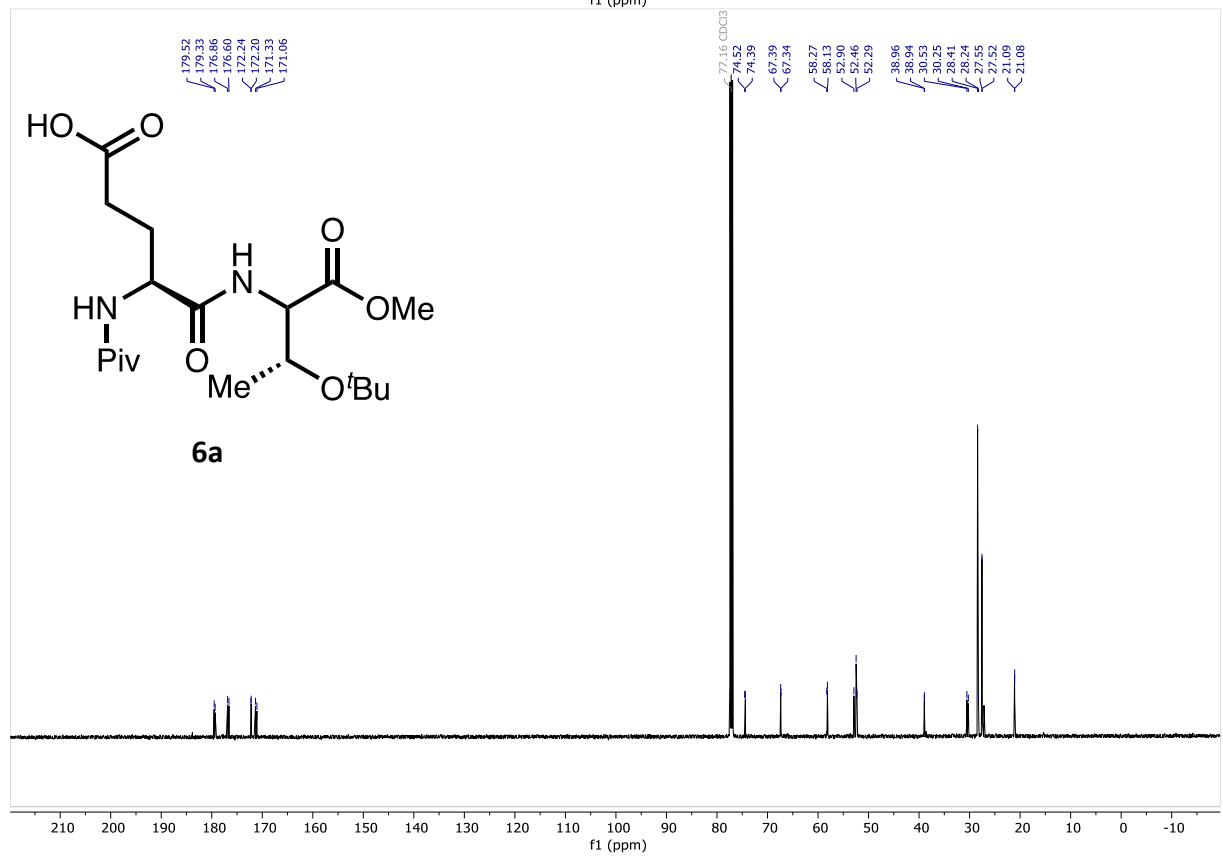

**(S)-5-(((S)-1-methoxy-3-methyl-1-oxobutan-2-yl)amino)-5-oxo-4-pivalamidopentanoic acid**

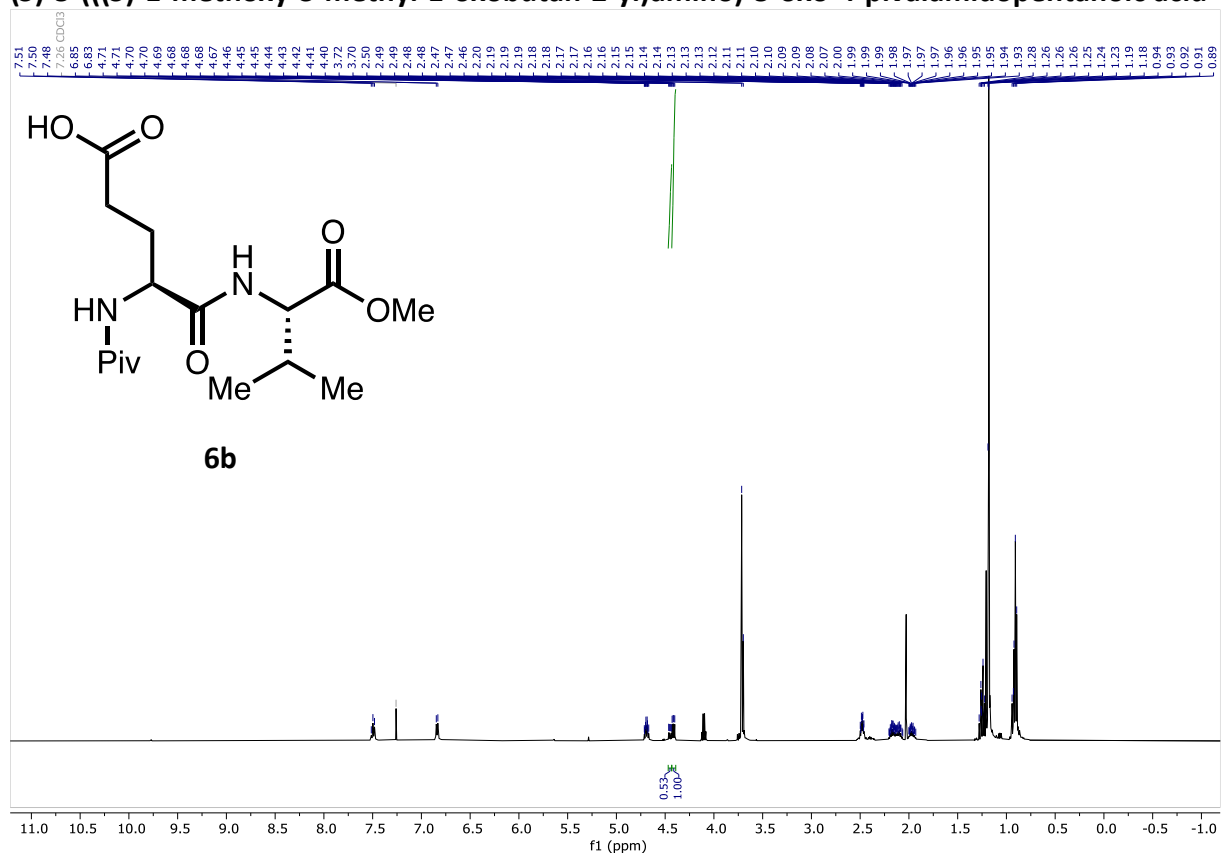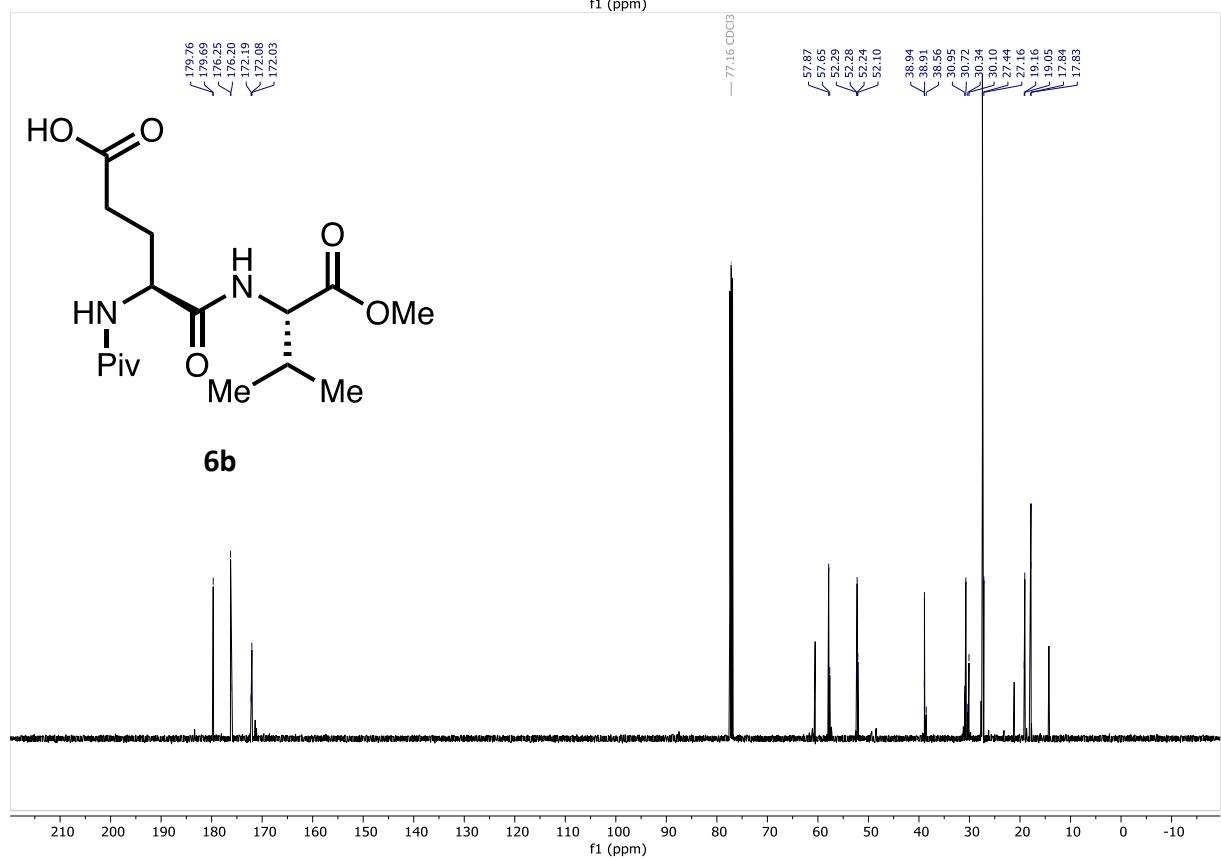

**1,3-dioxisoindolin-2-yl (*S*)-5-(((*S*)-1-methoxy-3-methyl-1-oxobutan-2-yl)amino)-5-oxo-4-pivalamidopentanoate**

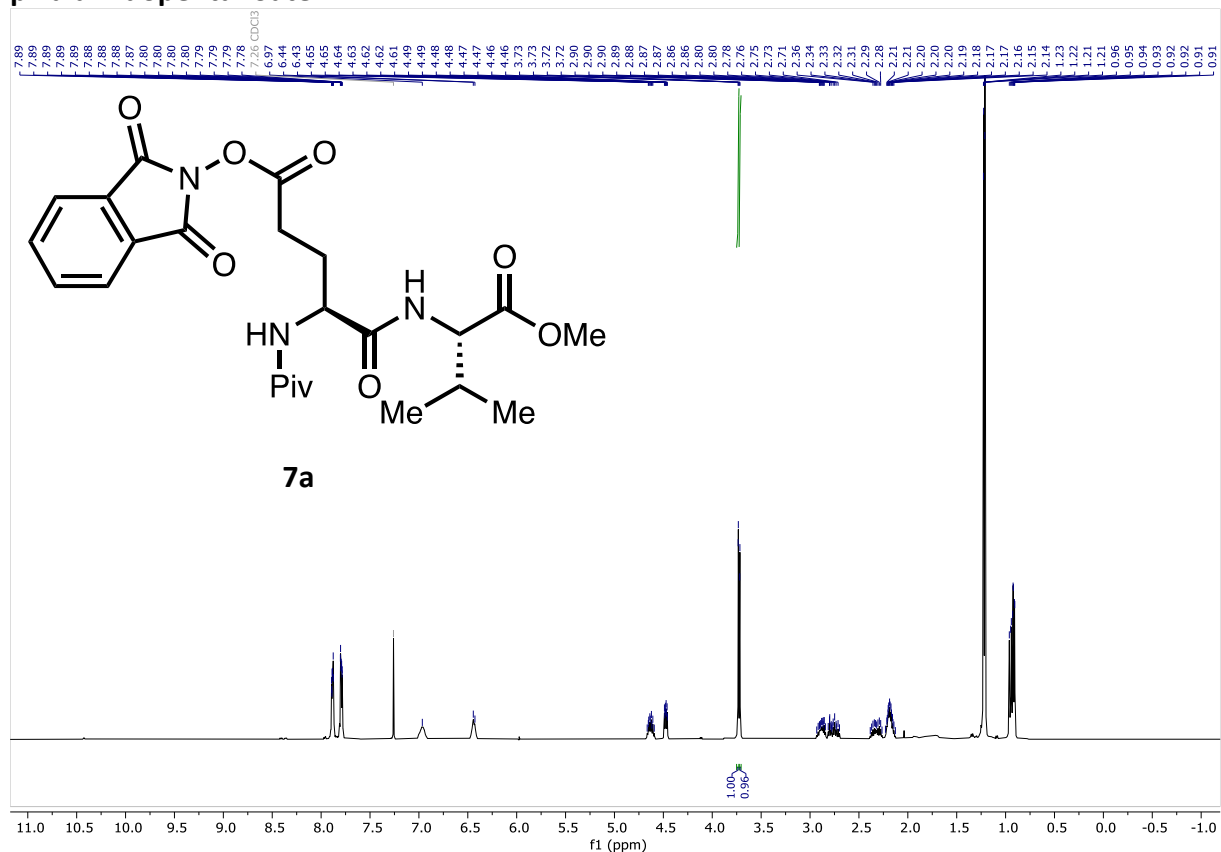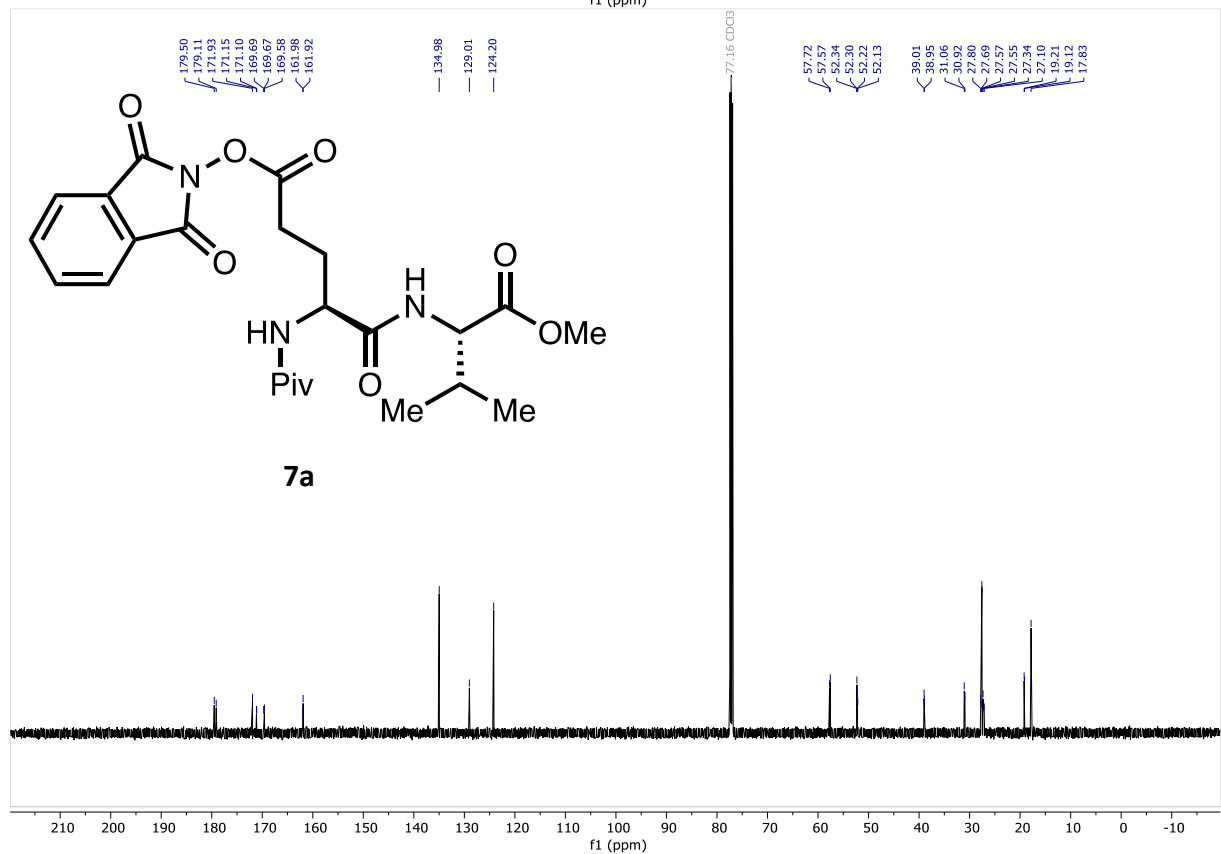

**Dimethyl 2,2'-(((S)-2-pivalamidopentanedioyl)bis(azanediy)))(2S,2'S)-bis(3-methylbutanoate)**

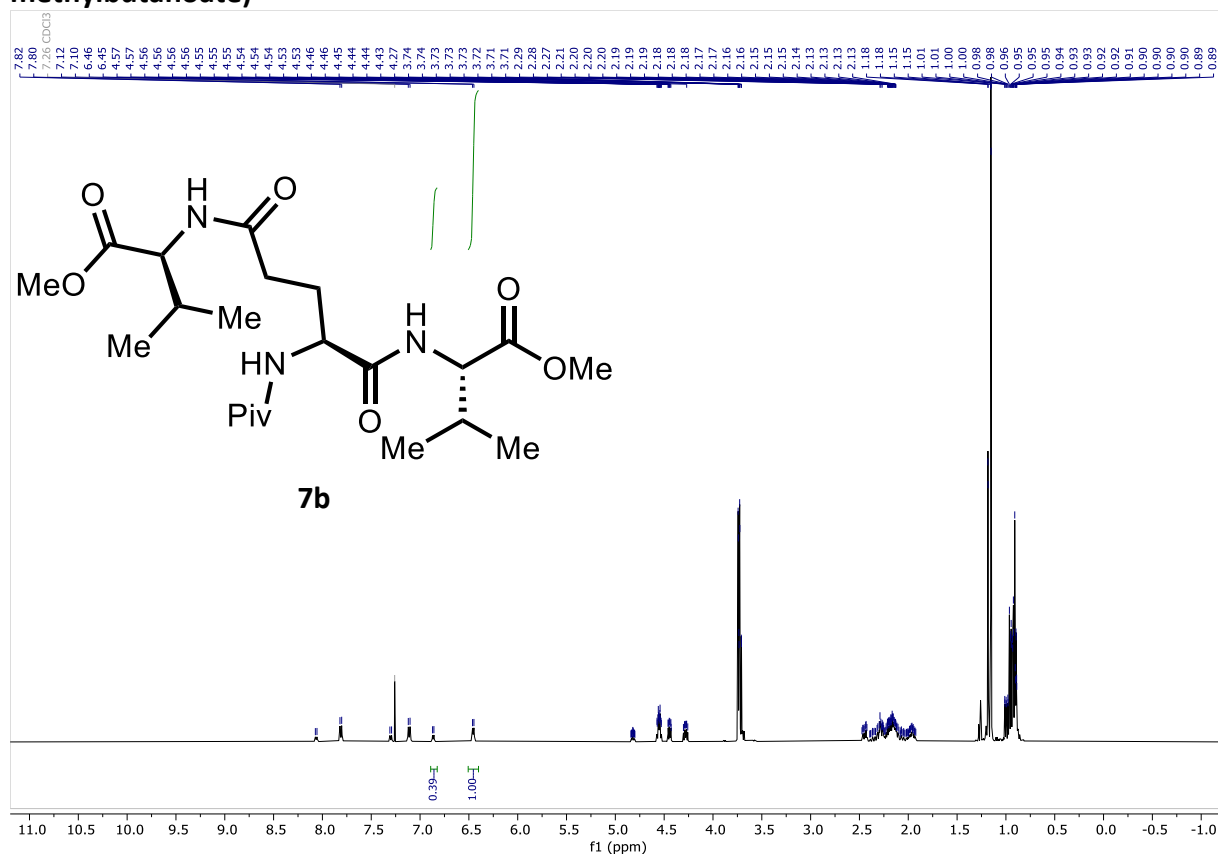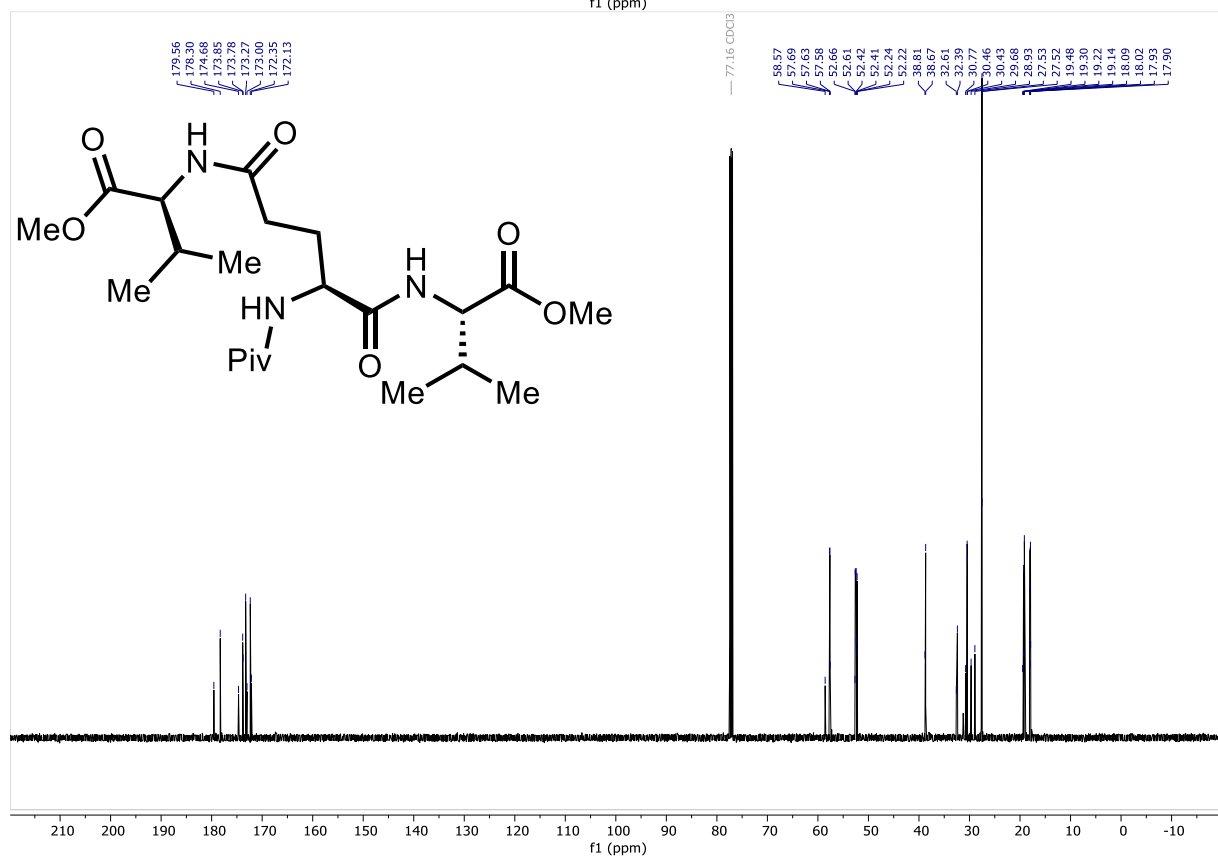

# NMR Spectra – Minisci Products

## N-(4-(4-(trifluoromethyl)pyridin-2-yl)butyl)pivalamide

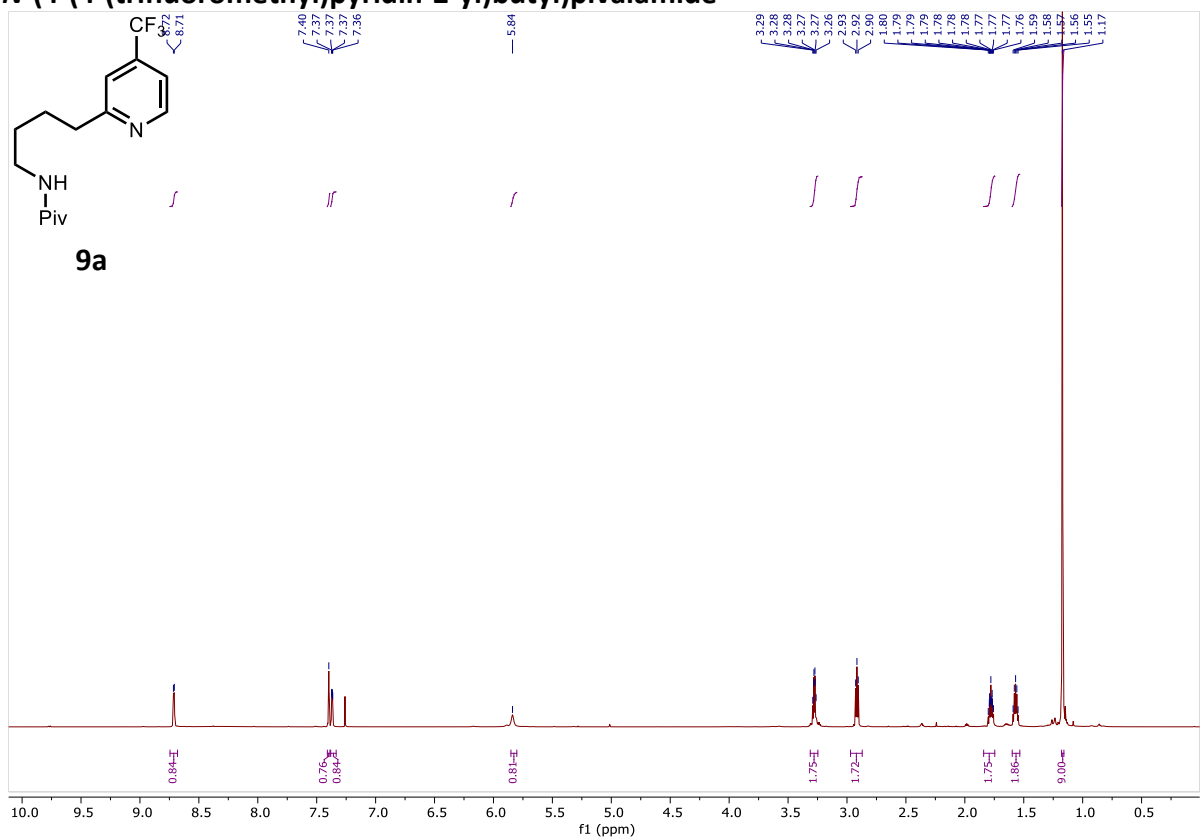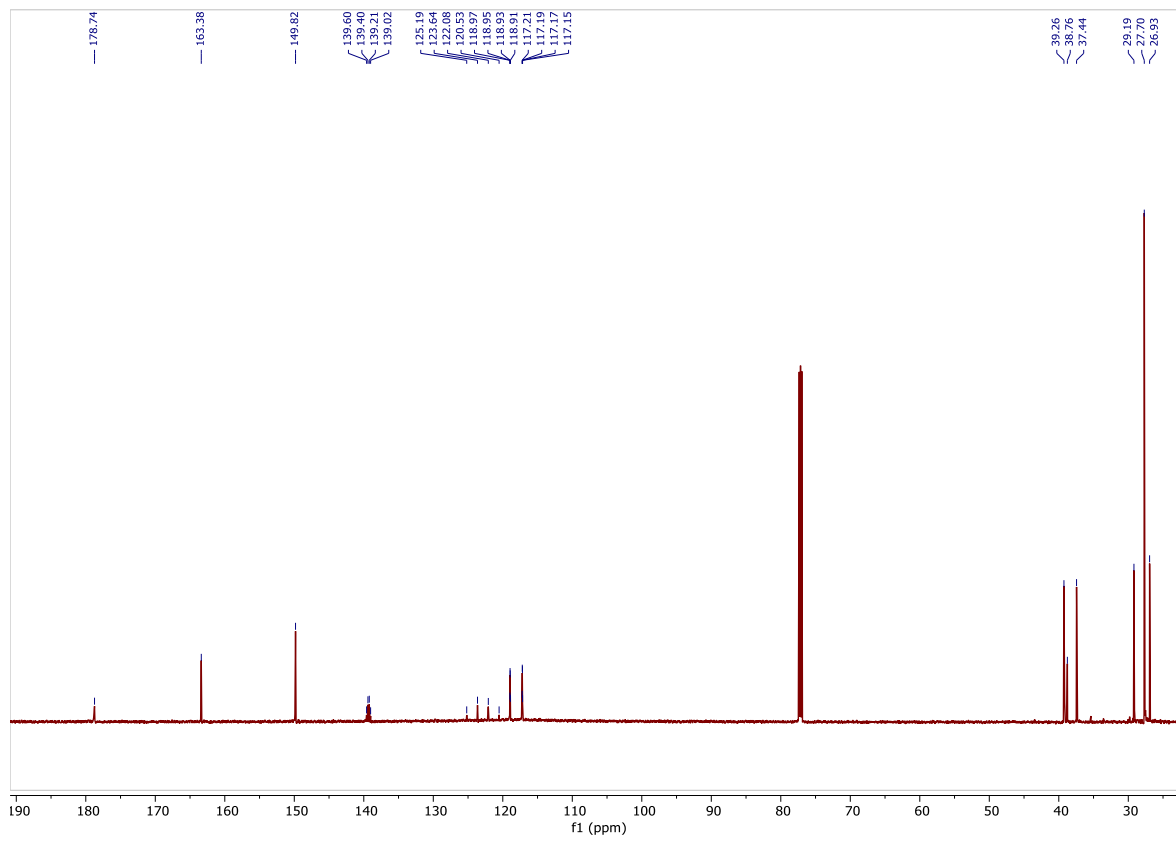



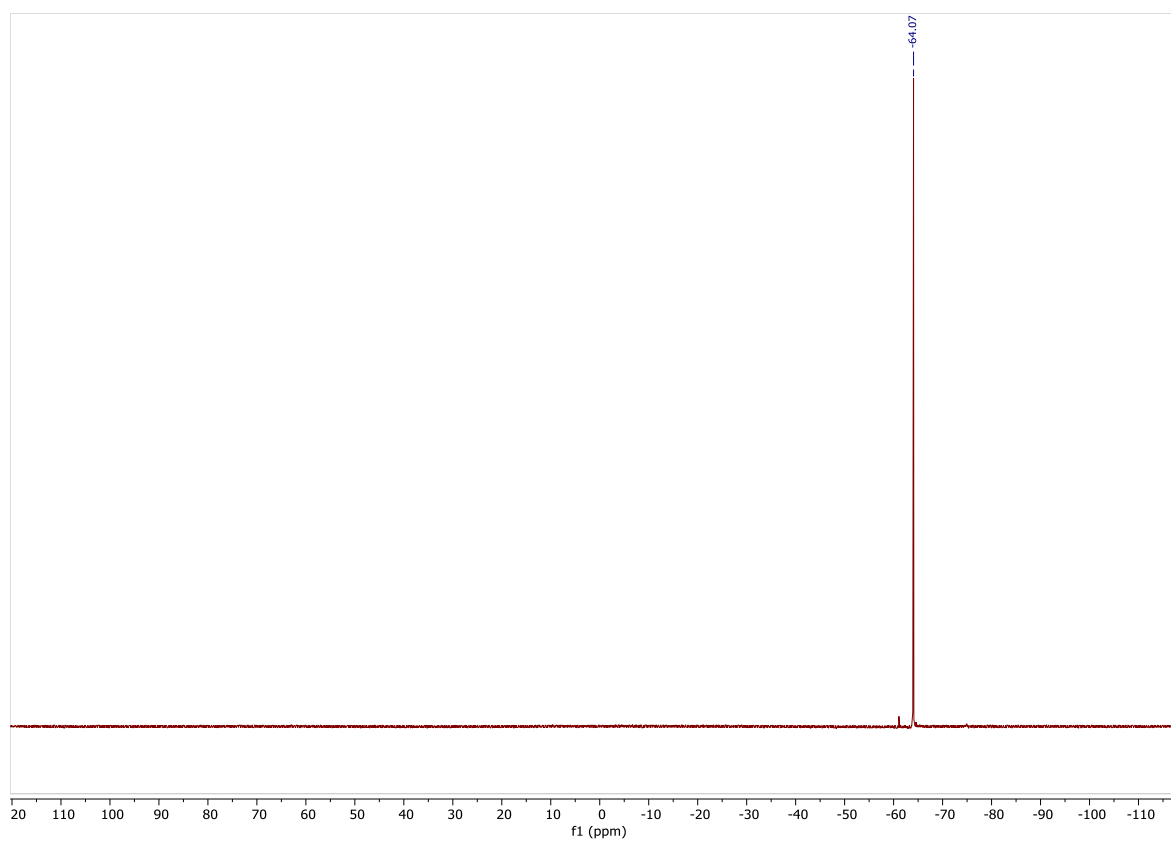

***N*-(4-(4-methoxypyridin-2-yl)butyl)pivalamide**

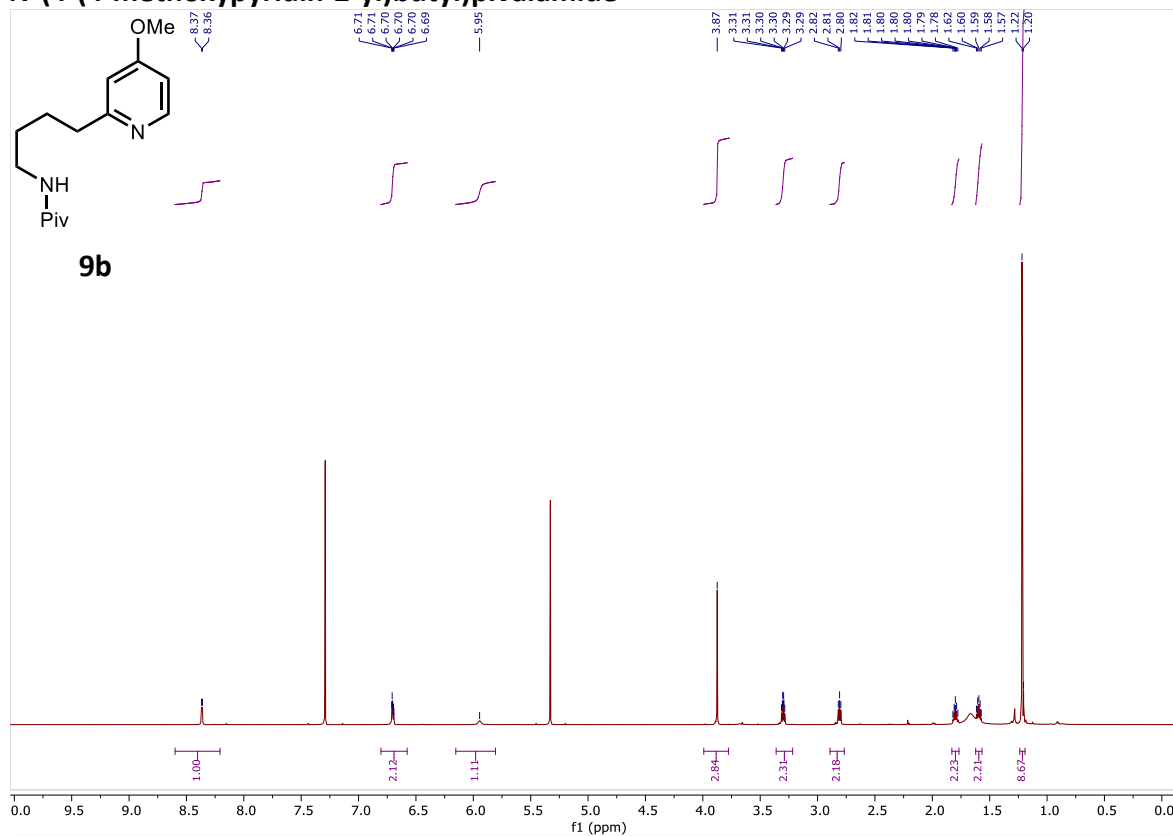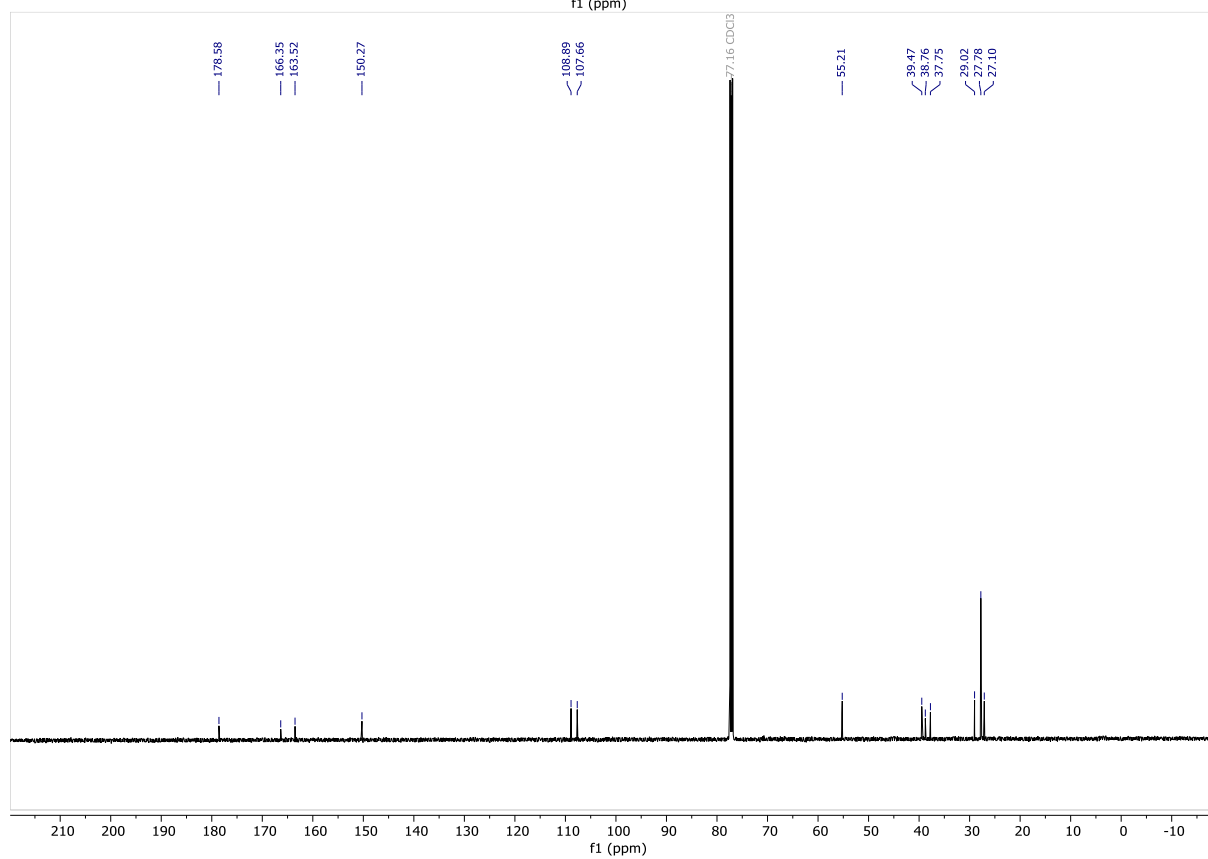

# N-(4-(4-cyanopyridin-2-yl)butyl)pivalamide

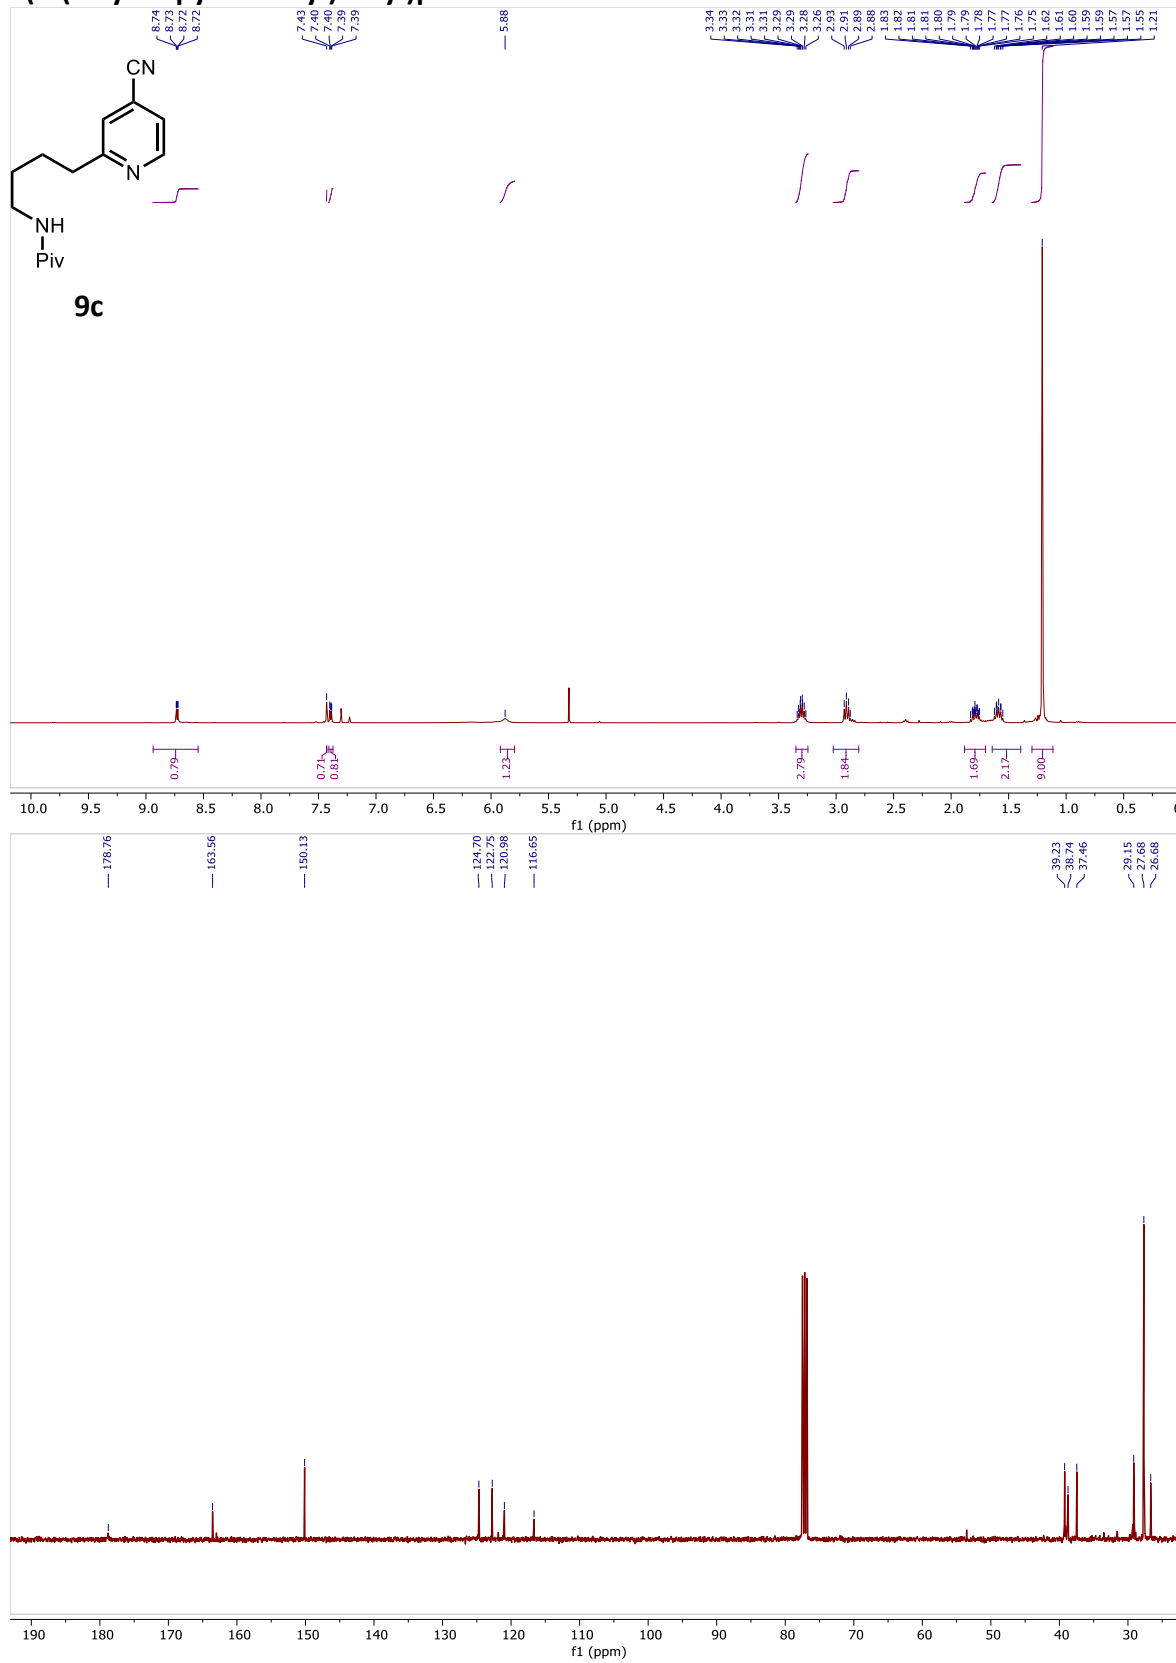

**N-(3-(4-(trifluoromethyl)pyridin-2-yl)propyl)pivalamide**

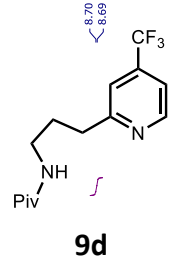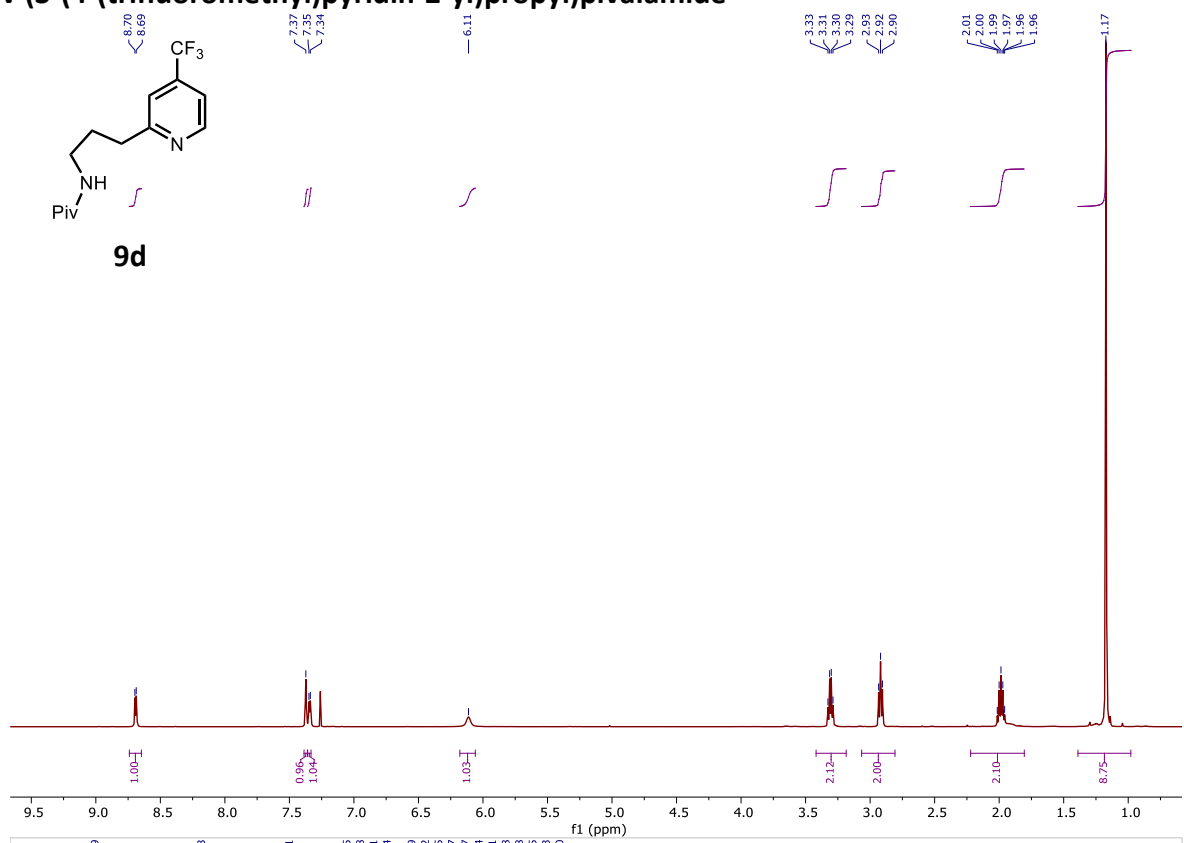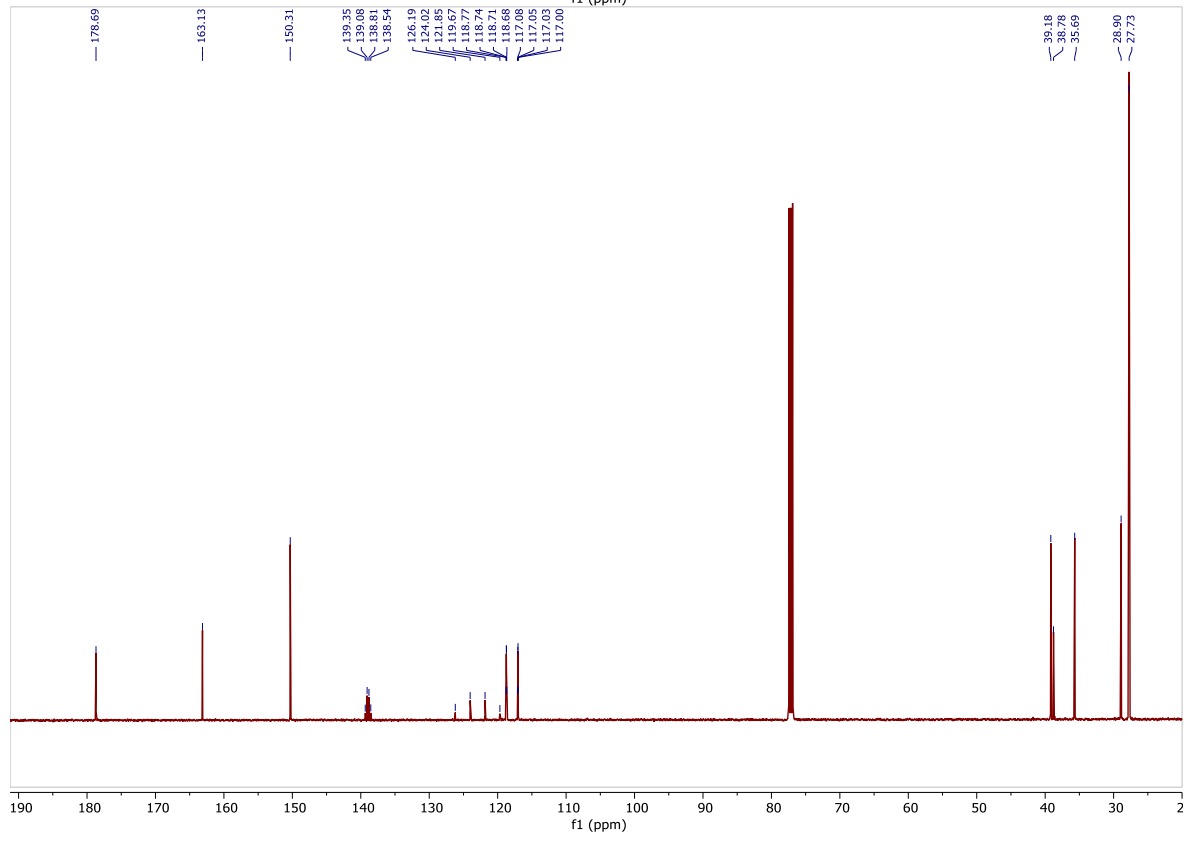

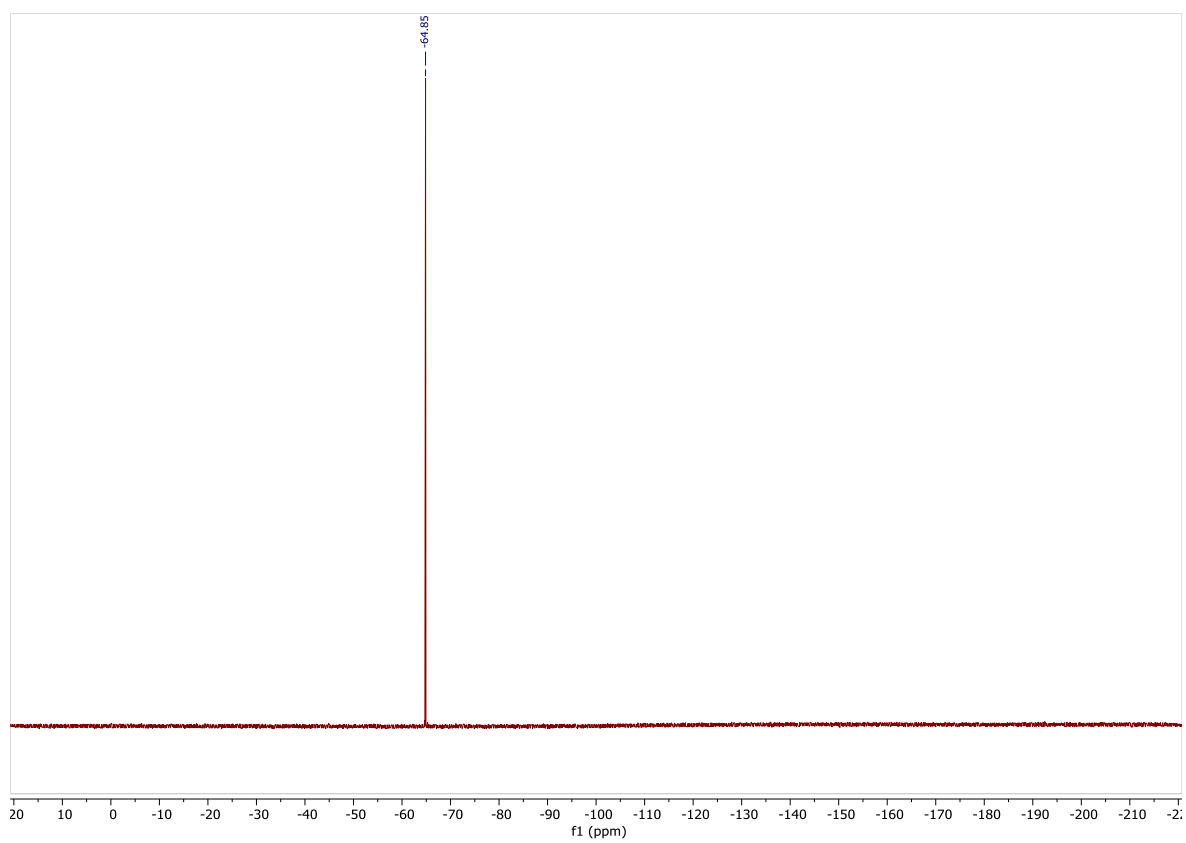

**N-(5-(4-(trifluoromethyl)pyridin-2-yl)pentyl)pivalamide**

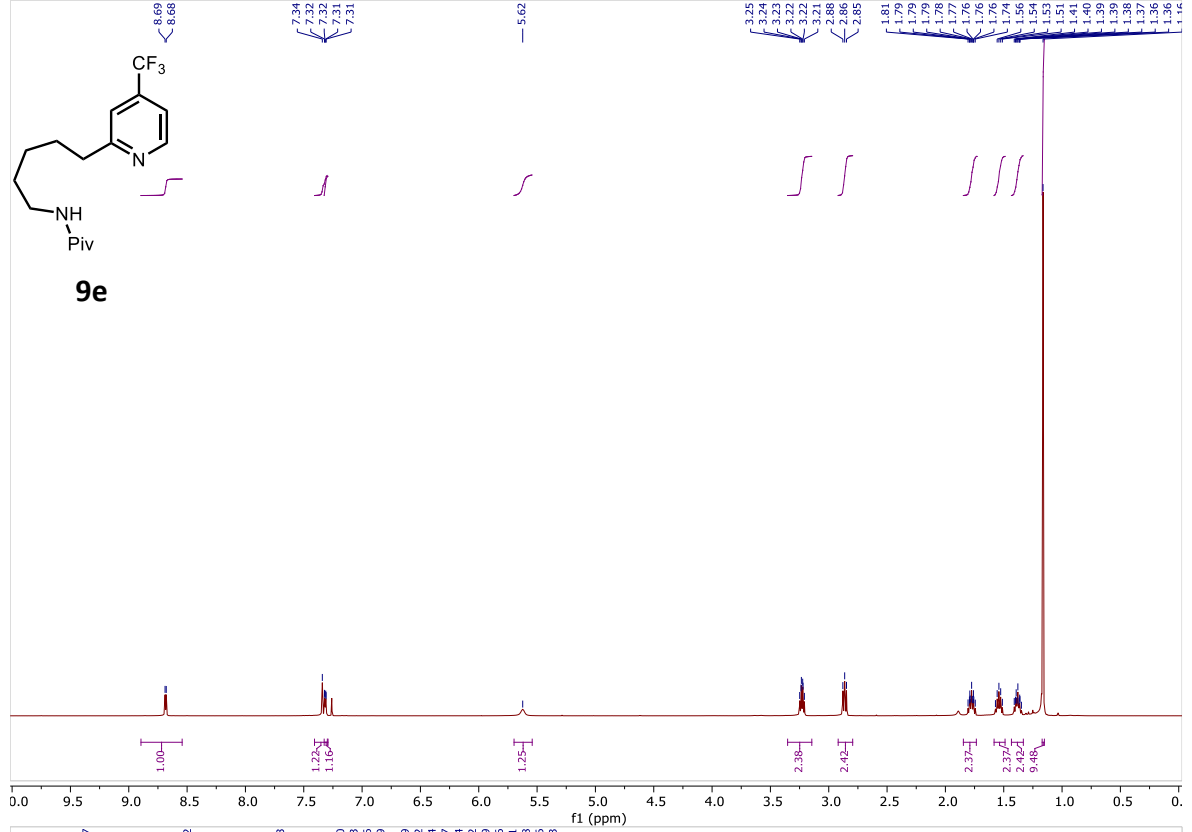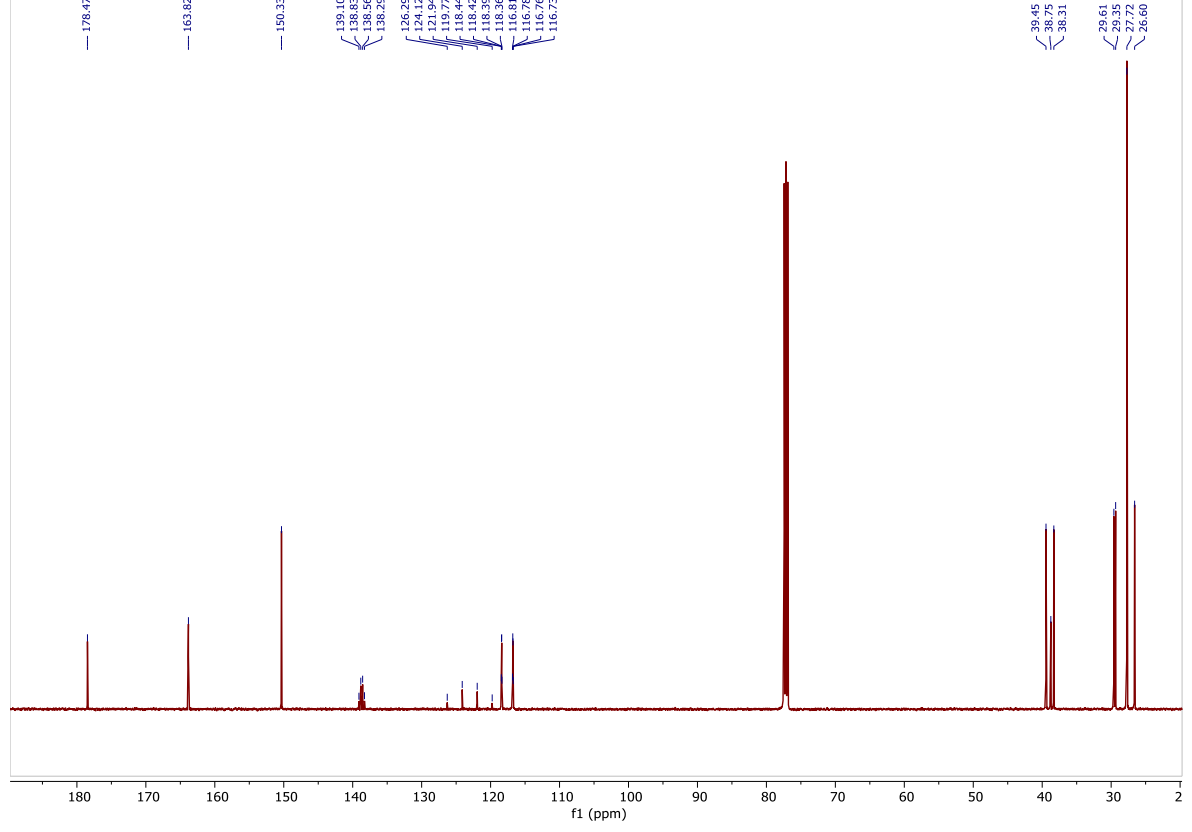

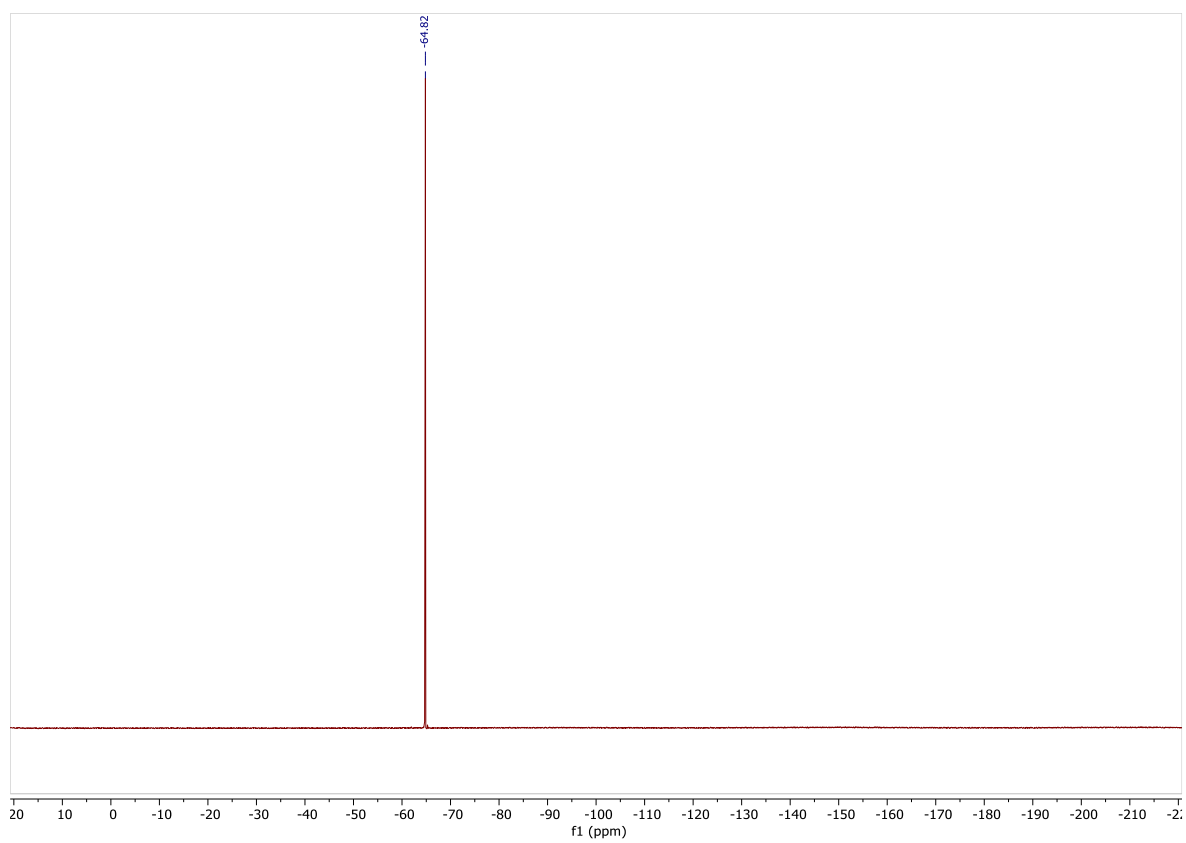

**N-(6-(4-(trifluoromethyl)pyridin-2-yl)hexyl)pivalamide**

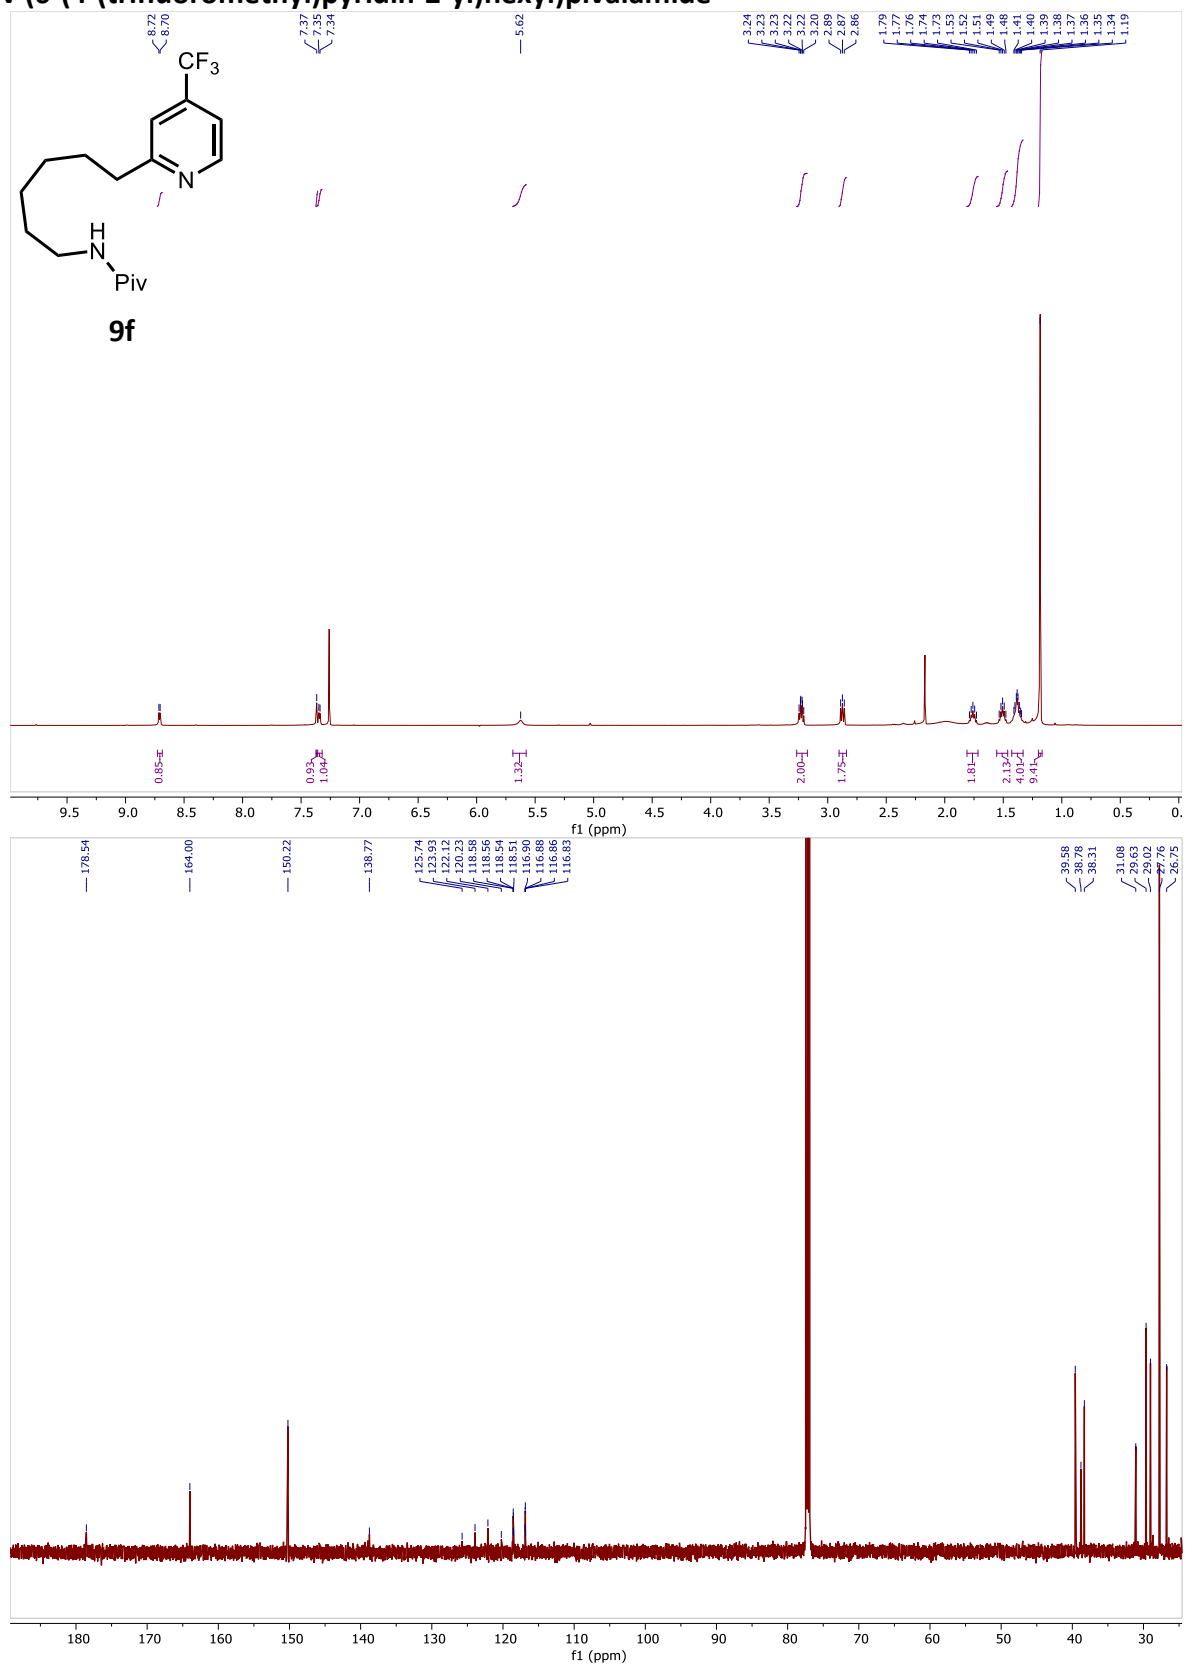



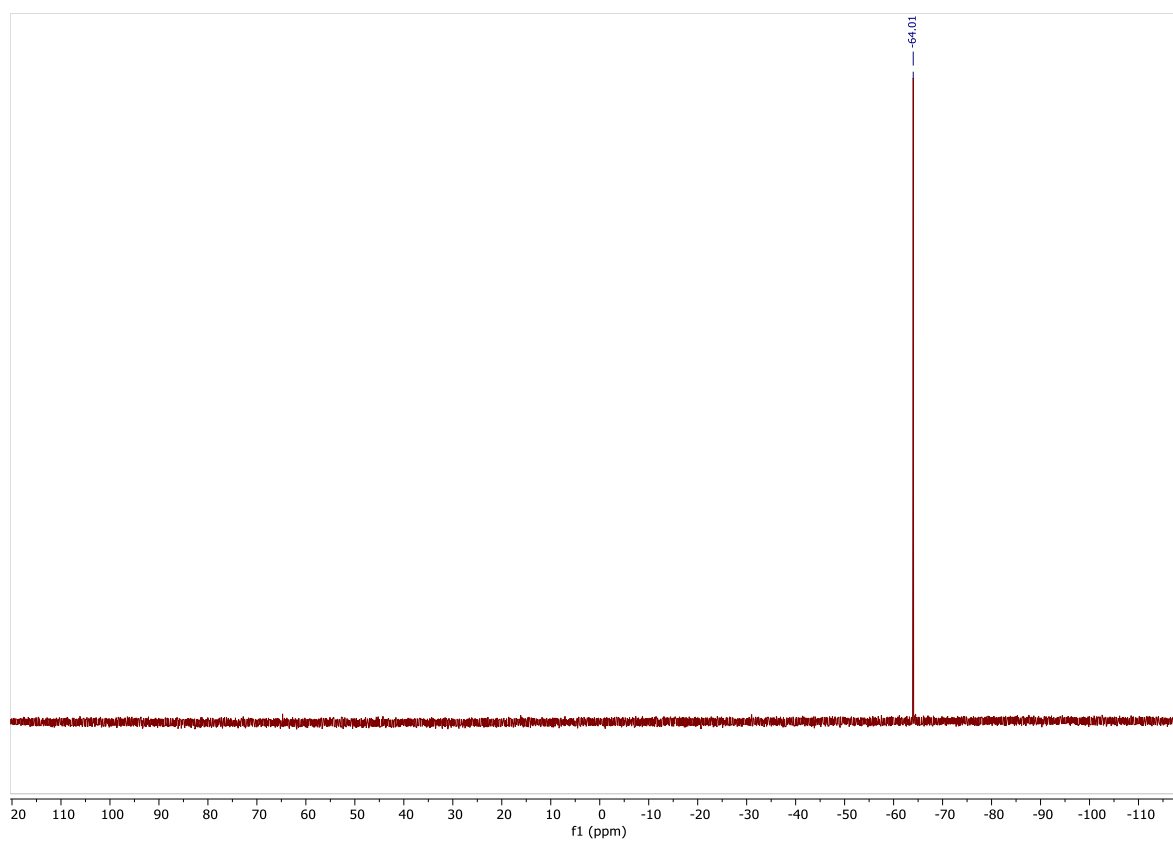

***N*-[5-(4-(trifluoromethyl)pyridin-2-yl)pentan-2-yl]pivalamide**

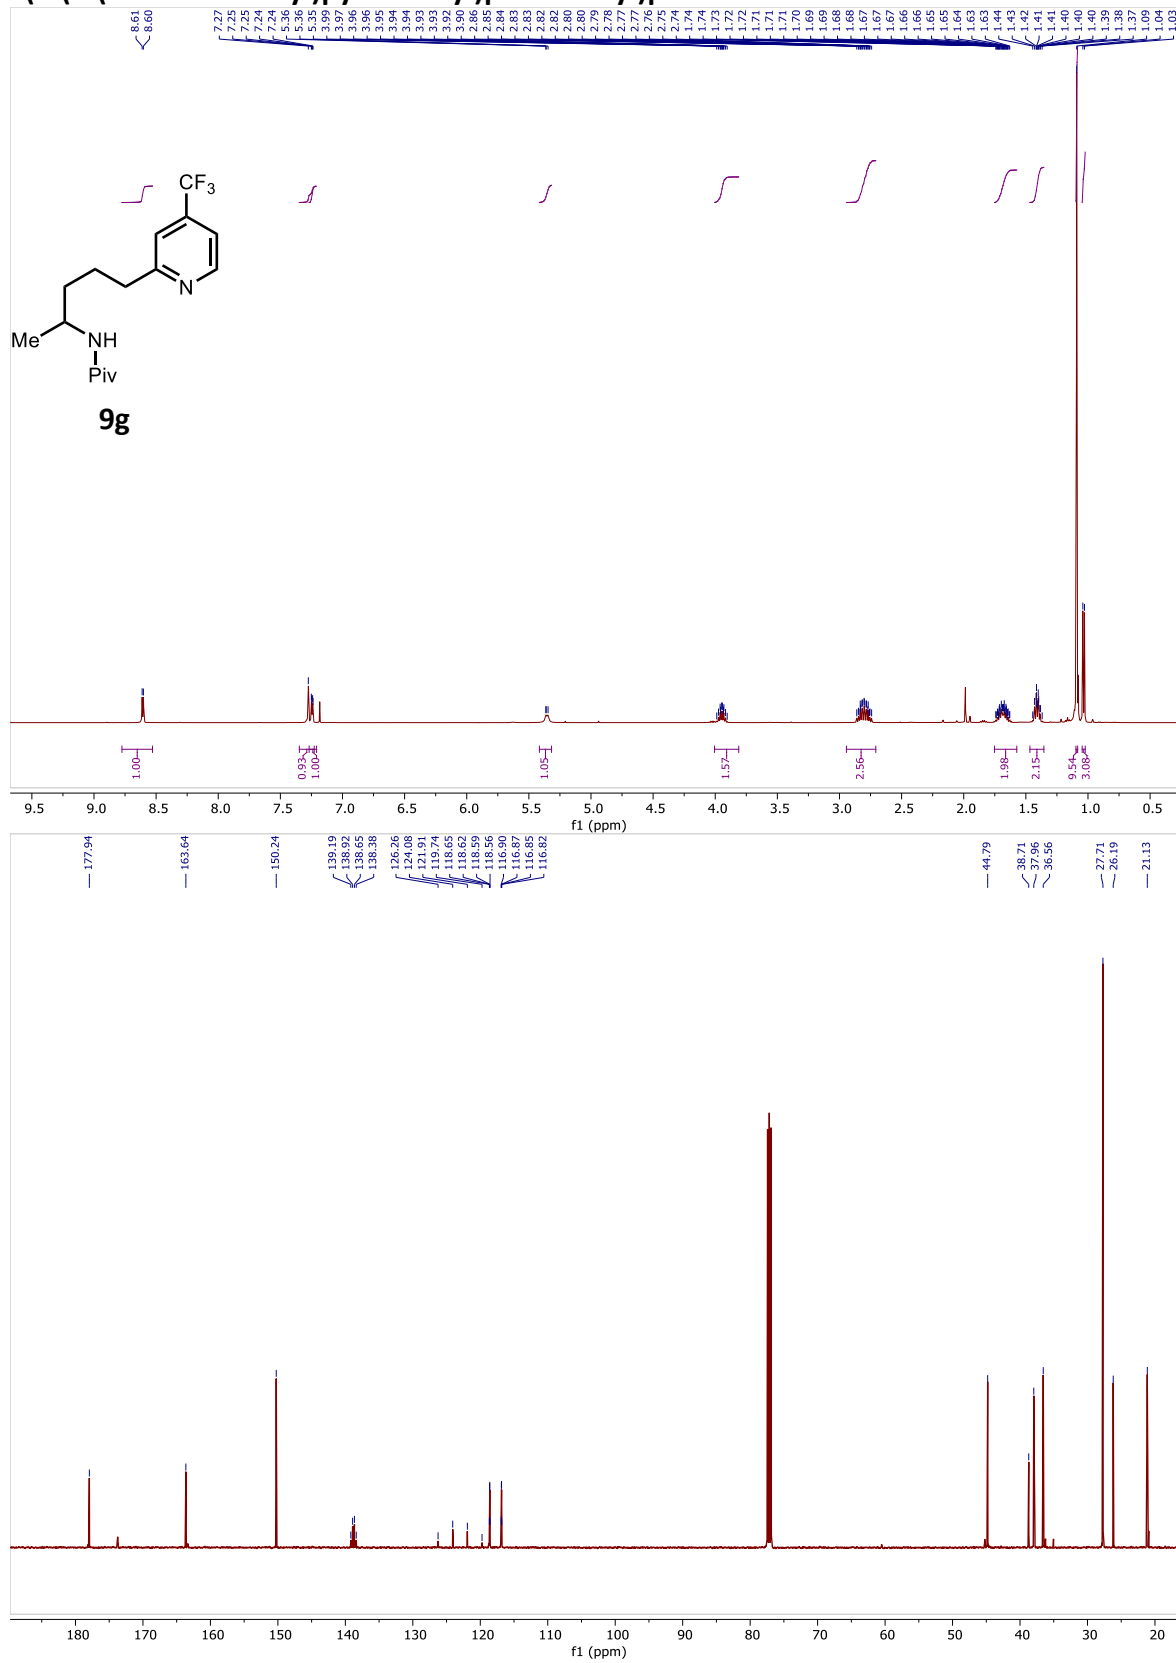

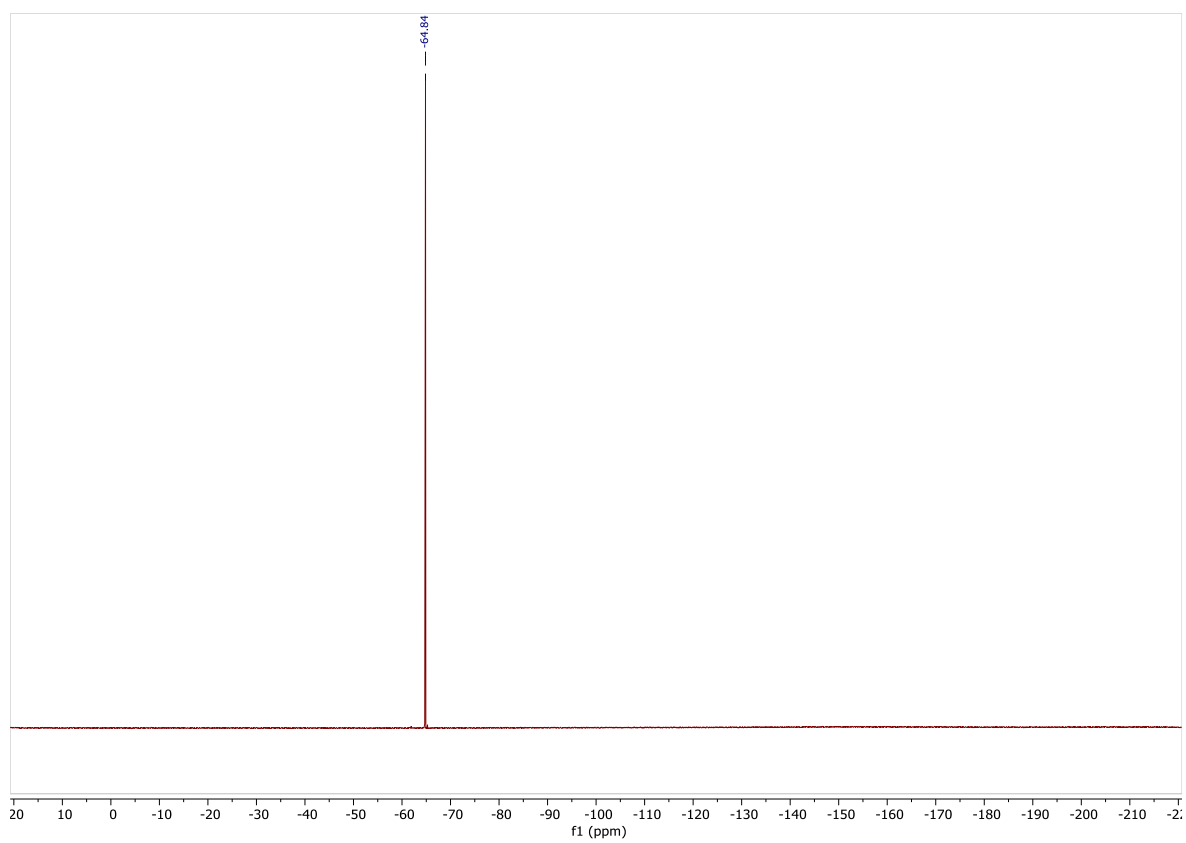

# NMR Spectra – Autocyclization Products

## 2-(*tert*-butyl)-5,6-dihydro-4*H*-1,3-oxazine

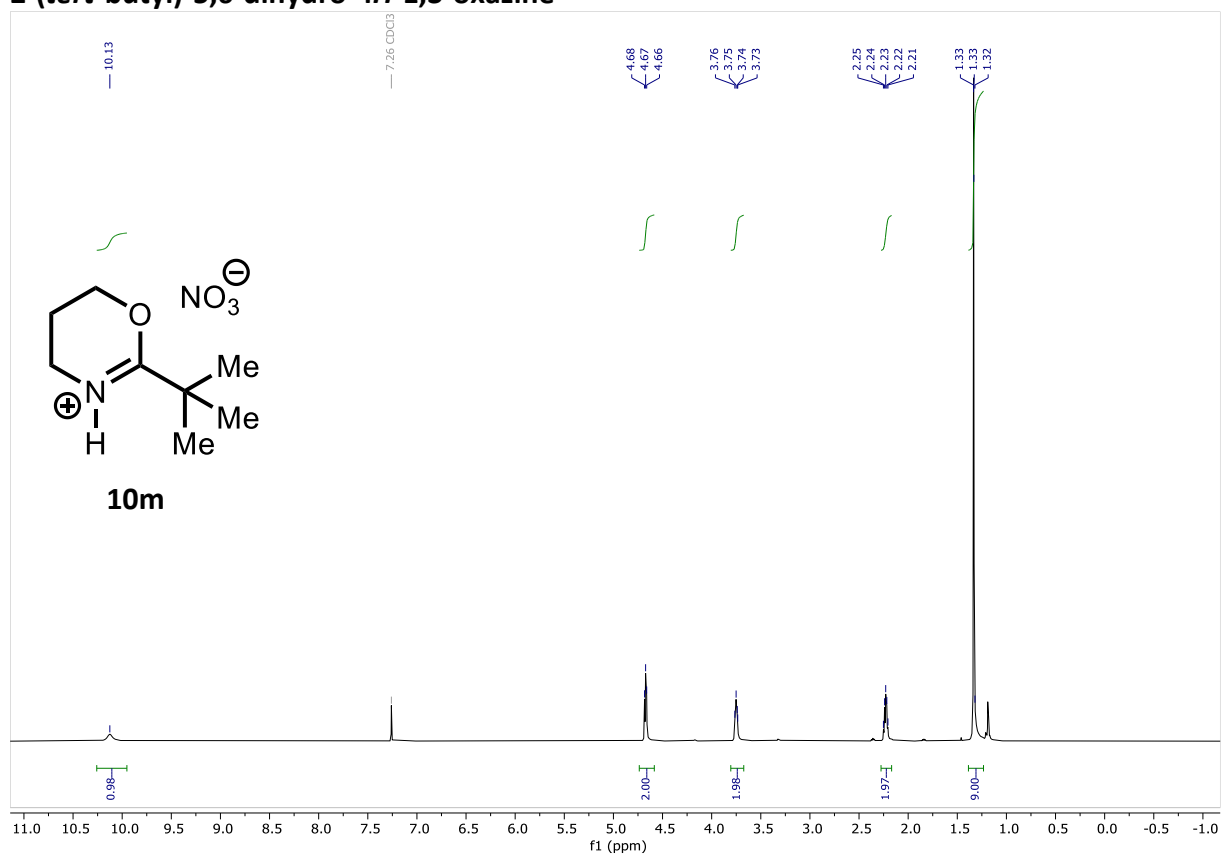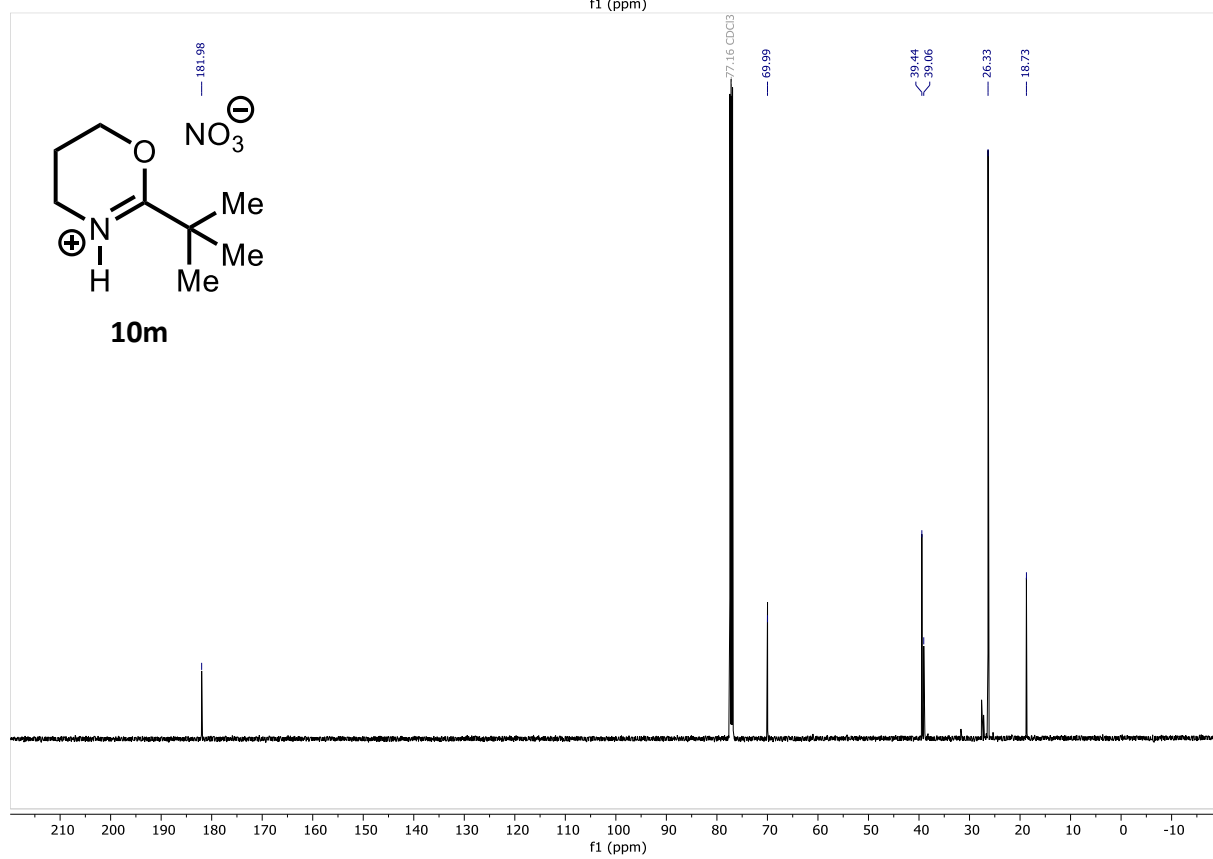

2-phenyl-5,6-dihydro-4H-1,3-oxazine

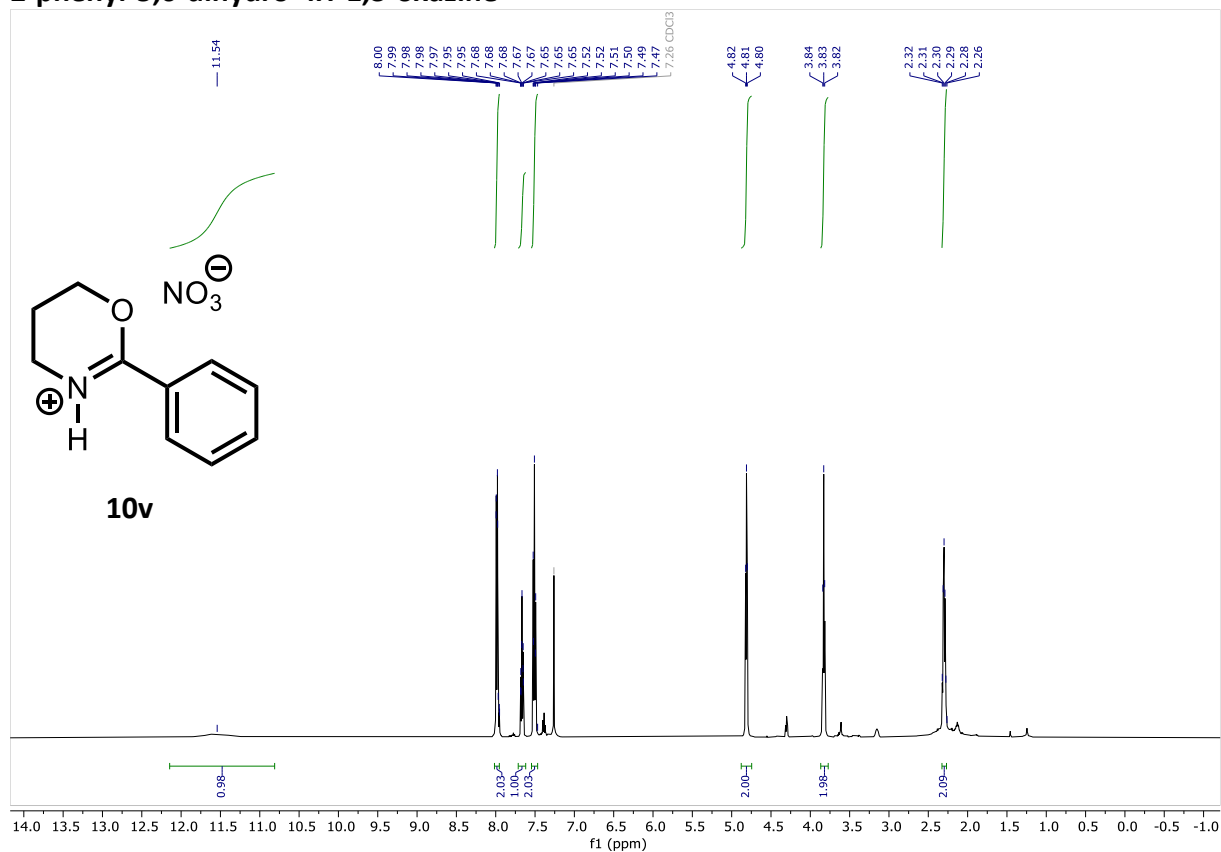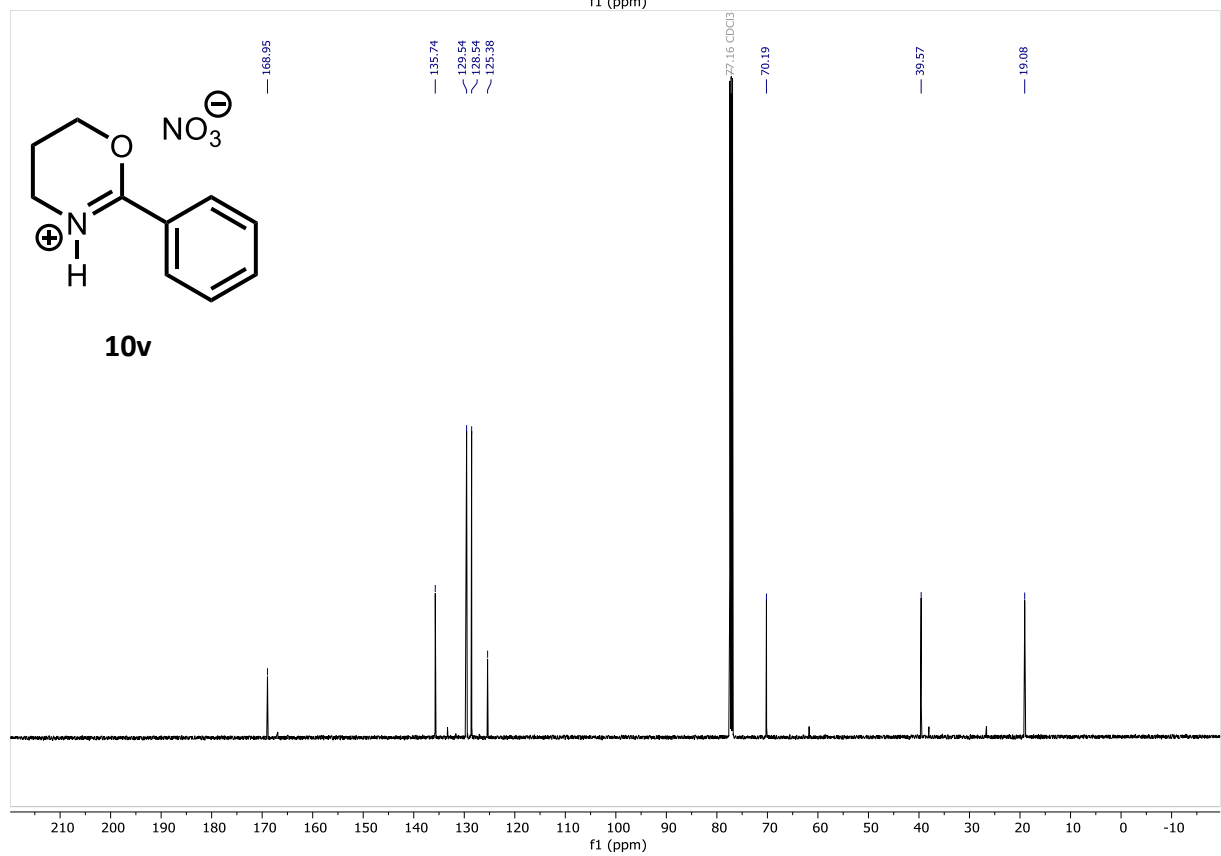

## 6. Computational Coordinates and Vibrational Frequencies

**Table S19.** Cartesian coordinates (in Å) of all calculated structures for the riboflavin and copper(I) oxidation reactions.

### Na<sub>2</sub>SO<sub>4</sub>

O -0.83724700 -2.60478100 -1.19689300  
Na -4.09655100 -4.68065400 -0.44750400  
S -2.02264500 -3.30178700 -1.84032300  
O -2.02830200 -4.77595300 -1.47741600  
O -3.32385800 -2.69881300 -1.34213100  
O -1.90034800 -3.12796100 -3.34366900  
Na 0.06257000 -1.92300200 -3.21157100

### HSO<sub>4</sub>\_1min

O -1.56928000 -2.19594600 -0.93216000  
S -2.09534900 -3.24272600 -2.12780700  
O -2.09854800 -4.58211600 -1.49366100  
O -3.43360800 -2.69149400 -2.42267400  
O -1.10820900 -3.10375100 -3.22448000  
H -0.68275500 -2.49111700 -0.66877800

### SO<sub>4</sub>\_minus

O -1.67668000 -2.32464200 -0.91454800  
S -2.02818900 -3.28715100 -2.06255000  
O -2.20590400 -4.67250300 -1.57908200  
O -3.37715400 -2.61451100 -2.37014800  
O -1.08387400 -3.15906300 -3.19227200

### NaHSO<sub>4</sub>

O -0.84364300 -2.71477400 -1.16892100  
S -1.93361200 -3.45523600 -1.86965300  
O -2.07257200 -4.86392000 -1.46080900  
O -3.34513700 -2.70345500 -1.44001300  
O -1.89945700 -3.20572300 -3.33515400  
Na -0.03018500 -1.71982800 -3.16793500  
H -3.52334700 -2.91757700 -0.50889600

### 1a

N -1.48973100 1.18530800 0.57649100  
C -0.50213800 1.37469200 -0.50409900  
C -0.42329800 2.84673300 -0.93089900  
C -1.82708600 3.45952300 -0.95637200  
C -2.42978800 3.47251000 0.46687200  
C -1.77629300 2.39468800 1.34908000  
H 0.47962400 0.99882600 -0.18708000  
H 0.21996300 3.41698200 -0.25056400  
H -1.80591100 4.47012400 -1.37486400  
H -2.27317800 4.44497900 0.94634000  
H -2.39994600 2.16309800 2.20372100  
H -3.51114000 3.30834800 0.41857500  
H -0.82709100 2.76720400 1.75332600  
H -2.45830300 2.85608400 -1.61956500  
H 0.04794500 2.89425600 -1.91746500  
H -0.82178200 0.75634200 -1.34577200  
C -1.95376700 -0.08535900 0.76395100  
O -1.49696500 -1.00064400 0.06410400  
C -3.04754500 -0.40437800 1.81883600

C -4.31900700 0.44757100 1.61257100  
H -5.11084200 0.07763400 2.27190100  
H -4.18403000 1.50658100 1.83274500  
H -4.67571400 0.36217800 0.58118100  
C -3.44869800 -1.87991800 1.63016100  
H -2.59087300 -2.54288600 1.75684200  
H -4.20983300 -2.14429500 2.37101300  
H -3.86050800 -2.05305500 0.63275000  
C -2.48566500 -0.25634800 3.25057000  
H -1.60178100 -0.88904900 3.37993700  
H -2.20378000 0.76591500 3.50835300  
H -3.24105000 -0.58240400 3.97294300

### 1.A

N -1.68274700 1.30592400 0.51590600  
C -1.29523400 1.41346600 -0.71435500  
C -1.10977000 2.69185200 -1.43211000  
C -1.16029700 3.92986800 -0.53429800  
C -2.22823400 3.73919000 0.54275100  
C -1.93726100 2.49881000 1.37731500  
H -0.17319800 2.60954300 -1.99667600  
H -0.18289100 4.08017800 -0.06483100  
H -2.26292800 4.59497400 1.22112300  
H -2.77056900 2.26244300 2.03018800  
H -3.21835900 3.64381400 0.08392100  
H -1.04347800 2.61971500 1.99584200  
H -1.37040700 4.81354700 -1.13982300  
H -1.89728900 2.70733900 -2.20212800  
H -1.10984100 0.48012000 -1.23902600  
C -1.75415900 -0.10105200 1.06809200  
O -0.84080000 -0.81771100 0.76562500  
C -2.98320400 -0.50919500 1.87242300  
C -4.27047200 0.09378800 1.27429800  
H -5.12491200 -0.30871600 1.82412900  
H -4.32177600 1.18115100 1.34739000  
H -4.38350000 -0.18500800 0.22307200  
C -3.06290000 -2.04783000 1.79226000  
H -2.16960500 -2.51333300 2.21223200  
H -3.93301000 -2.38325000 2.36166700  
H -3.17479800 -2.38379800 0.75819700  
C -2.79842300 -0.11179300 3.35964100  
H -1.87121700 -0.52984500 3.75979700  
H -2.79116400 0.96567800 3.52835200  
H -3.63539000 -0.52958000 3.92533500

### 1a\_OH

N -1.43566600 1.18260000 0.61171800  
C -0.44309000 1.38299000 -0.43627200  
C -0.48712000 2.82941900 -0.95774700  
C -1.92201500 3.36421200 -0.93393200  
C -2.42296000 3.44867200 0.52266500  
C -1.71673300 2.39061800 1.39206200  
H 0.15920500 3.45176200 -0.32765800

H -1.98172600 4.34085800 -1.42234700  
H -2.21300000 4.43672700 0.94640300  
H -2.29544400 2.15354700 2.27627000  
H -3.50733000 3.30575800 0.55727500  
H -0.75467800 2.77528600 1.74668700  
H -2.56229900 2.68410700 -1.50774400  
H -0.06703600 2.85112400 -1.96808900  
H -0.69153400 0.68408700 -1.23933200  
C -1.97553200 -0.07657400 0.73729900  
O -1.58566300 -0.98149900 -0.00709100  
O 0.83368300 1.05735700 0.11607400  
H 1.49422300 1.22650200 -0.57068700  
C -3.06505400 -0.38230100 1.79918500  
C -4.30131800 0.53151000 1.65089900  
H -5.10474300 0.15118500 2.28957200  
H -4.12402000 1.56714300 1.93946100  
H -4.66475000 0.52594600 0.61836900  
C -2.46706900 -0.30933000 3.22202600  
H -2.12506300 0.68781900 3.50378500  
H -3.22524300 -0.61661800 3.94942800  
H -1.61669600 -0.99236000 3.31344100  
C -3.53521900 -1.83106200 1.56700800  
H -2.70531800 -2.53529500 1.64832000  
H -4.28943400 -2.08867100 2.31698600  
H -3.97852200 -1.94869300 0.57502400

#### **Na<sub>2</sub>S<sub>2</sub>O<sub>8</sub>**

S 1.62960000 2.08771400 -5.89558900  
O 0.70032800 3.10867100 -5.35698100  
O 0.99701800 1.19925700 -6.89813400  
O 2.98644100 2.54504200 -6.21053600  
S 0.74807400 -0.96887500 -3.54144200  
O 0.92503700 -1.68173200 -4.82869500  
O -0.60581200 -1.02156300 -2.97171900  
O 1.87546000 -1.11171200 -2.61362200  
Na 0.99865200 -1.05055800 -6.98683900  
Na -0.53182400 2.63685500 -3.44496800  
O 0.71857600 0.70894400 -3.95828500  
O 1.99911100 1.09863500 -4.54952800

#### **K<sub>2</sub>S<sub>2</sub>O<sub>8</sub>**

S 1.64186700 2.07693400 -5.78680500  
O 1.48475300 3.36651800 -5.09729700  
O 0.35345100 1.45584300 -6.19332100  
O 2.72063300 1.96051700 -6.78334300  
S 0.78866500 -0.81056400 -3.45713200  
O 0.75815500 -1.33886600 -4.83427100  
O -0.53809100 -0.54550700 -2.85607300  
O 1.78575100 -1.43231100 -2.57526600  
K 1.30854200 -0.87143400 -7.37190400  
K -1.42993200 1.83622800 -4.10374900  
O 1.27506600 0.85089300 -3.58518500  
O 2.29180000 1.00242800 -4.61199200

#### **(2.A.m), SINGLET**

C -10.49493900 -0.18817900 -0.06030800  
C -9.84257500 -0.75029700 1.01751500  
C -8.71001000 -0.14349700 1.60353200

C -8.21474500 1.07891900 1.06822100  
C -8.88376900 1.65262100 -0.02571700  
C -10.00036800 1.04334200 -0.58563600  
N -8.13298200 -0.74466000 2.68157400  
N -7.10245100 1.65099800 1.66874700  
C -6.52211900 1.08036100 2.77675400  
C -7.10175100 -0.16840600 3.23345200  
C -6.47482900 -0.81446600 4.42076800  
O -6.85001400 -1.87087300 4.91094400  
N -5.41454000 -0.09456600 4.92288900  
C -4.90299300 1.12765600 4.43558000  
N -5.50368200 1.69430600 3.33913400  
H -10.18548400 -1.68105100 1.45700100  
H -8.56250700 2.60045900 -0.43258600  
H -4.94211900 -0.47904800 5.73317900  
O -3.94593500 1.63285500 5.01240800  
C -10.69498500 1.69711400 -1.74820300  
H -10.20465300 2.63001600 -2.03172500  
H -10.70662400 1.03446000 -2.62065700  
H -11.74065900 1.91707500 -1.50596400  
C -11.70438000 -0.84945500 -0.66486700  
H -12.58184600 -0.19518500 -0.61576100  
H -11.54253100 -1.08470600 -1.72265300  
H -11.94276300 -1.77795900 -0.14232100  
C -6.57600600 2.95405400 1.22762400  
H -5.49959700 2.94150700 1.39285400  
H -6.76442200 3.06663200 0.16309300  
C -7.17870200 4.10004000 2.03320700  
H -6.95878900 3.97674500 3.09305000  
H -6.77302800 5.04642100 1.67268000  
O -8.60525700 4.17908500 1.83667900  
C -9.39331700 3.53926400 2.73580100  
O -8.96363400 2.92890800 3.69461200  
C -10.84315300 3.65912900 2.35484100  
H -11.04351900 2.96495200 1.53212100  
H -11.46948200 3.39361100 3.20570800  
H -11.07344500 4.66720600 2.00537900

#### **(2.A.m), TRIPLET**

C -10.50250400 -0.13931500 -0.05930700  
C -9.86745100 -0.71114800 1.04071600  
C -8.72554000 -0.15434700 1.63562800  
C -8.20453900 1.06928500 1.05326100  
C -8.85741900 1.64427700 -0.05827500  
C -9.98540300 1.07257900 -0.62122500  
N -8.18764100 -0.77193700 2.72077700  
N -7.08997600 1.63959600 1.63231600  
C -6.52812100 1.03479200 2.77780400  
C -7.10995000 -0.15880800 3.26847000  
C -6.49052800 -0.75868400 4.45064700  
O -6.86617900 -1.79154100 5.00265700  
N -5.39646600 -0.04619200 4.94233200  
C -4.87414700 1.12733400 4.42512200  
N -5.47907900 1.65374500 3.28991400  
H -10.25503300 -1.62294500 1.48163300  
H -8.49470000 2.57161300 -0.47757000  
H -4.94458200 -0.42296800 5.76738400  
O -3.90915700 1.68171000 4.94813000

C -10.65982100 1.71919400 -1.79890200  
H -10.14196600 2.63412900 -2.09290200  
H -10.68196500 1.04671200 -2.66394600  
H -11.70056700 1.97508300 -1.57015300  
C -11.72197300 -0.78274500 -0.64554100  
H -12.57798200 -0.09855200 -0.61138200  
H -11.56433700 -1.02920300 -1.70205800  
H -11.98636600 -1.69636600 -0.11118100  
C -6.57509000 2.94964300 1.21621900  
H -5.50232300 2.95895000 1.39811700  
H -6.74244500 3.06908600 0.14885300  
C -7.20805100 4.08920600 2.01479500  
H -6.97244700 3.98526600 3.07389700  
H -6.83379000 5.04199700 1.63729600  
O -8.63635700 4.12336400 1.83605900  
C -9.39122800 3.46673800 2.75286700  
O -8.92625100 2.88153800 3.71069700  
C -10.84893500 3.53644200 2.39193900  
H -11.03208100 2.86068300 1.55025000  
H -11.45299400 3.22255600 3.24226400  
H -11.12322300 4.54462100 2.07535100

#### **(2.A.m)\_1plus**

C -10.48532200 -0.16990300 -0.07289600  
C -9.85009100 -0.72774600 1.03532200  
C -8.72488500 -0.13787200 1.60776600  
C -8.19537600 1.08423400 1.02907600  
C -8.85292900 1.65134100 -0.09292800  
C -9.96696500 1.05543400 -0.64036100  
N -8.17695300 -0.71864700 2.71281200  
N -7.10708800 1.64765900 1.61005700  
C -6.53764800 1.07079800 2.74506600  
C -7.14462300 -0.14433100 3.25198700  
C -6.53323900 -0.75787400 4.47382200  
O -6.94809800 -1.77518100 4.99420400  
N -5.44974900 -0.04899300 4.95451700  
C -4.91133900 1.12061800 4.4228200  
N -5.50504200 1.66277900 3.27079900  
H -10.22411500 -1.63779300 1.48910500  
H -8.49936700 2.57572600 -0.52337700  
H -4.99376900 -0.41335600 5.78500100  
O -3.95109900 1.66308800 4.93689800  
C -10.64878400 1.67668900 -1.82066900  
H -10.14937400 2.59602700 -2.12727000  
H -10.65827900 0.98448700 -2.66936200  
H -11.69328200 1.90772300 -1.58621200  
C -11.69091100 -0.82175700 -0.66126400  
H -12.55046400 -0.14177500 -0.62604800  
H -11.52593900 -1.05669600 -1.71924700  
H -11.94675300 -1.73936200 -0.13176900  
C -6.57734000 2.96084900 1.18111900  
H -5.50339200 2.95121500 1.35371900  
H -6.75961600 3.07771600 0.11798100  
C -7.20431500 4.08915300 2.00301500  
H -6.94495600 3.98268500 3.05630300  
H -6.83246300 5.03887100 1.61762700  
O -8.63304900 4.12838900 1.85176500  
C -9.36914500 3.43614100 2.76156600

O -8.87052400 2.73753700 3.62271700  
C -10.83886600 3.62195600 2.52018900  
H -11.11666100 3.10588500 1.59581400  
H -11.40111900 3.19946700 3.35146300  
H -11.07567400 4.68020500 2.39236500

#### **(2.A.m)\_1minus**

C -10.50883600 -0.17275400 -0.06763700  
C -9.84799600 -0.75458200 1.00631100  
C -8.71103500 -0.17647100 1.61912400  
C -8.23062400 1.05928500 1.08748100  
C -8.89915100 1.64485500 0.00830300  
C -10.02688000 1.05559800 -0.57638700  
N -8.14185600 -0.80945500 2.68138500  
N -7.09605100 1.63434600 1.68861100  
C -6.51917400 1.03930100 2.80545200  
C -7.07120200 -0.18953300 3.25357300  
C -6.44583800 -0.80662100 4.40973100  
O -6.78235300 -1.87286600 4.94808200  
N -5.36933800 -0.07992700 4.91652100  
C -4.86959800 1.13718300 4.43616600  
N -5.48580900 1.68553400 3.35338000  
H -10.20006900 -1.69393100 1.42353600  
H -8.57631300 2.60268200 -0.37720100  
H -4.90408000 -0.47200500 5.72536200  
O -3.90058300 1.65521800 5.01324700  
C -10.71775900 1.73961900 -1.72856800  
H -10.21979900 2.67782200 -1.98602600  
H -10.73090300 1.10893200 -2.62607000  
H -11.76460800 1.96875400 -1.49419300  
C -11.72195200 -0.83403600 -0.67253700  
H -12.60553400 -0.18717500 -0.61322900  
H -11.57109700 -1.05949500 -1.73511100  
H -11.95553100 -1.77029600 -0.15960400  
C -6.57699900 2.92902600 1.25339000  
H -5.50113200 2.93044800 1.42705600  
H -6.75372000 3.04369700 0.18457800  
C -7.17626400 4.09194400 2.03776800  
H -6.97287800 3.97138900 3.10119600  
H -6.76379900 5.03765700 1.67980600  
O -8.60230200 4.17676100 1.82304300  
C -9.40901000 3.58806000 2.73547000  
O -9.01560900 3.08789200 3.77092800  
C -10.84160200 3.61388400 2.27435400  
H -10.97400500 2.81824600 1.53350900  
H -11.50527100 3.43284300 3.11950100  
H -11.08204300 4.56355900 1.79265000

#### **(2.A.t), with two acetates**

C -10.88276600 -0.48173900 -0.00614700  
C -9.88349300 -0.96896800 0.81092200  
C -8.68674500 -0.25326900 1.03385800  
C -8.49372500 1.00365600 0.39458000  
C -9.51389300 1.50051600 -0.43288900  
C -10.68751500 0.78410000 -0.63583600  
N -7.75522200 -0.78593500 1.87394500  
N -7.30787700 1.68303000 0.63719000  
C -6.36737700 1.18205900 1.50650300



C -6.66281700 -0.10989500 2.09585600  
C -5.64773700 -0.68035800 3.02546600  
O -5.75727100 -1.76132300 3.58770100  
N -4.55666000 0.14166500 3.19460300  
C -4.33322300 1.40065600 2.59677200  
N -5.28836400 1.89562400 1.74325900  
H -9.98878900 -1.92249800 1.31754600  
H -9.42013400 2.46924200 -0.90167200  
H -3.82703100 -0.18670500 3.81703900  
O -3.29803600 2.00050400 2.86515500  
C -11.76063400 1.35727200 -1.51966800  
H -11.46829100 2.32857800 -1.92239500  
H -11.97629100 0.68664800 -2.35888200  
H -12.69832600 1.48133100 -0.96667000  
C -12.15331900 -1.25873700 -0.22396700  
H -13.02958100 -0.68785900 0.10270900  
H -12.30196200 -1.48939200 -1.28467100  
H -12.13457400 -2.19956500 0.32958700  
C -7.05629800 3.01695000 0.07386300  
H -5.98570600 3.10461300 -0.09827300  
H -7.57481000 3.10702100 -0.87800800  
C -7.48298900 4.11654700 1.04760600  
H -6.95272800 3.98848100 1.99177700  
O -8.90353400 4.04483100 1.28517900  
C -9.32416300 3.36980700 2.38816700  
O -8.56998200 2.83182300 3.17217700  
C -10.82503600 3.35481900 2.45979000  
H -11.20090800 2.63976400 1.72079600  
H -11.14142200 3.04200300 3.45402300  
H -11.23567700 4.33596700 2.21427600  
C -7.23604300 5.50423700 0.47647600  
H -7.58377700 6.26832200 1.17598500  
H -7.75427700 5.64277700 -0.47665700  
O -5.81581600 5.61152300 0.28632600  
C -5.38108900 6.75565800 -0.29192700  
O -6.13070900 7.65087300 -0.62367500  
C -3.88508000 6.74278200 -0.45229200  
H -3.55683800 7.67647500 -0.90673800  
H -3.40725600 6.61337000 0.52274900  
H -3.58661500 5.89780900 -1.07921300

**(2.A.th), with three acetates**

C -10.78353500 -0.43055800 -0.54791100  
C -9.94942500 -0.82210900 0.47874800  
C -8.82364700 -0.05825600 0.85789700  
C -8.52954000 1.14780700 0.16126900  
C -9.38035600 1.54547300 -0.88280200  
C -10.48679900 0.78325200 -1.23795100  
N -8.06110900 -0.49471100 1.89982100  
N -7.42143900 1.88030900 0.56653600  
C -6.65241200 1.47422700 1.63299000  
C -7.03769000 0.22638000 2.26349700  
C -6.21097700 -0.23590800 3.41376900  
O -6.41015900 -1.27065000 4.03503700  
N -5.18545500 0.63073600 3.71748400  
C -4.86862000 1.84268200 3.06754700  
N -5.64783300 2.23560900 2.00700600  
H -10.13694200 -1.73328700 1.03691100

H -9.21018700 2.47291000 -1.41003300  
H -4.58540000 0.37637500 4.49391500  
O -3.91383700 2.49448200 3.47539000  
C -11.38068900 1.25113000 -2.35286800  
H -11.02756300 2.19193200 -2.77854700  
H -11.42919300 0.50601900 -3.15467300  
H -12.40635900 1.39736600 -1.99642200  
C -11.98340600 -1.25538000 -0.92909000  
H -12.91036700 -0.68072100 -0.82423900  
H -11.92751000 -1.58001000 -1.97404600  
H -12.06103100 -2.14418500 -0.29987300  
C -7.09069300 3.18121800 -0.03490700  
H -6.00906000 3.28191500 -0.02841900  
H -7.44012900 3.20439800 -1.06361400  
C -7.70542700 4.30527200 0.80308400  
H -7.31031300 4.24447200 1.81724200  
O -9.13830200 4.12411200 0.84190400  
C -9.68483300 3.55440900 1.94383400  
O -9.03646100 3.20225700 2.90955000  
C -11.17236200 3.42048400 1.78479000  
H -11.38427200 2.73274800 0.96073100  
H -11.60719900 3.03787800 2.70679900  
H -11.61073200 4.38858500 1.53012300  
C -7.48897900 5.69500500 0.19250400  
H -8.26469200 5.87725000 -0.55365000  
O -6.20279500 5.69443200 -0.45641500  
C -6.06414700 6.49118500 -1.55127000  
O -6.94928100 7.21061400 -1.96211200  
C -4.69205300 6.33744600 -2.14483700  
H -4.58199400 7.01043000 -2.99381600  
H -3.93314600 6.55749300 -1.38934100  
H -4.54515400 5.30259200 -2.46717200  
C -7.45967500 6.81216300 1.23832700  
H -6.55225700 6.72565300 1.83696100  
H -7.49257600 7.78386500 0.74374100  
O -8.61412300 6.73258700 2.09214100  
C -8.40983500 6.37097500 3.38551900  
O -7.31780300 6.11292600 3.84946200  
C -9.70515100 6.31380600 4.14909400  
H -10.53775800 6.70706000 3.56678700  
H -9.90055600 5.26951300 4.40775000  
H -9.59682900 6.87444700 5.08019700

**(2.A.f), with four acetates**

C -10.66493300 -0.19968400 -0.70290900  
C -9.92297400 -0.66203900 0.36436200  
C -8.80622100 0.04676600 0.85939400  
C -8.42338900 1.26927500 0.23905600  
C -9.18135500 1.74040600 -0.84488000  
C -10.28131000 1.03219100 -1.31371600  
N -8.13913900 -0.45625600 1.93625200  
N -7.32412200 1.94372900 0.75359300  
C -6.65267400 1.47139200 1.85784700  
C -7.12515900 0.21503200 2.40646400  
C -6.40489800 -0.31805800 3.59696700  
O -6.68388900 -1.36760100 4.15987200  
N -5.37914800 0.50104200 4.01229200  
C -4.97463200 1.72459500 3.43729600

N -5.65569700 2.18257300 2.33592700  
H -10.17994700 -1.58877100 0.86642600  
H -8.94383000 2.68345400 -1.31534800  
H -4.84992500 0.19765200 4.82192500  
O -4.03558200 2.32867800 3.94339200  
C -11.07488800 1.57810600 -2.46840700  
H -10.66200900 2.52385000 -2.82378700  
H -11.08641700 0.87064600 -3.30494800  
H -12.11927600 1.74383300 -2.18167100  
C -11.85667500 -0.96750200 -1.20855200  
H -12.77186500 -0.36844200 -1.14515200  
H -11.73255000 -1.24746700 -2.26050400  
H -12.00692700 -1.88037000 -0.62885900  
C -6.90391300 3.25030000 0.22884100  
H -5.82271600 3.30701300 0.32359400  
H -7.17387700 3.32303200 -0.82172700  
C -7.53764500 4.36966900 1.05939800  
H -7.21090400 4.26468400 2.09321500  
O -8.97351600 4.24589700 0.99080800  
C -9.61482900 3.66137700 2.03132000  
O -9.04278300 3.23203800 3.01439100  
C -11.09485300 3.61843300 1.78328600  
H -11.29446200 3.02442000 0.88675200  
H -11.59837500 3.17697800 2.64181000  
H -11.46986900 4.62913800 1.60232400  
C -7.22661700 5.75913000 0.49557000  
H -7.87273000 5.93082800 -0.36742800  
O -5.85441600 5.78536300 0.05981800  
C -5.60934000 5.99229800 -1.26163600  
O -6.48027600 6.04821700 -2.10477400  
C -4.13600600 6.15389200 -1.50104600  
H -3.93338700 6.14775400 -2.57097700  
H -3.81174500 7.10665400 -1.07098900  
H -3.57820700 5.35869500 -1.00108300  
C -7.35500900 6.89609400 1.52985700  
H -6.39948200 6.97981100 2.04968200  
O -8.38718900 6.62147900 2.49516700  
C -7.99359600 6.25953300 3.74940900  
O -6.83520400 6.06654700 4.05312300  
C -9.17585600 6.10320300 4.66365900  
H -10.00828400 6.73306400 4.34902400  
H -9.49473700 5.05719000 4.63021700  
H -8.87495800 6.34126700 5.68433200  
C -7.76408200 8.21948400 0.89516700  
H -8.75583900 8.14000900 0.44545500  
H -7.77947600 9.01305900 1.64699800  
O -6.79171800 8.53394700 -0.11564300  
C -7.22060800 9.28419900 -1.16113800  
O -8.34694000 9.72861500 -1.24135500  
C -6.13292200 9.44947100 -2.18658400  
H -6.04752100 8.51680500 -2.75286000  
H -6.38891700 10.26231900 -2.86518500  
H -5.17139700 9.64117500 -1.70597200

**(2.A.m)-[K<sub>2</sub>S<sub>2</sub>O<sub>4</sub>], SINGLET**

S -0.08250500 -0.95435300 -4.71253200  
O -0.60439500 -1.62436400 -5.91212700  
O 0.37494200 -1.86710200 -3.64568600

O 0.76060200 0.23392500 -4.93787600  
S -2.96104000 -0.61743800 -2.06519700  
O -1.76556600 -0.73168600 -1.18729400  
O -3.98117700 -1.65218100 -1.85916600  
O -3.44209100 0.76787200 -2.23199200  
K -0.27682600 -3.01647300 -1.34865600  
K -2.42355500 2.47062100 -4.11380600  
O -2.44044900 -1.09078500 -3.62312900  
O -1.43811400 -0.11473100 -4.04814700  
C 5.38628900 0.58780300 -3.19281400  
N 4.26202200 1.50620500 -3.44311200  
H 6.06648900 0.62647000 -4.03960400  
C 6.09265200 0.91951400 -1.88243800  
C 4.42844000 2.67032200 -4.18096600  
C 3.07157000 1.22994000 -2.81988700  
H 5.39766700 0.84423200 -1.04682900  
H 6.92881000 0.23357300 -1.73947700  
O 6.66621100 2.24215400 -1.92229300  
C 3.31653200 3.55084700 -4.30223900  
C 5.64055100 3.03050700 -4.79293900  
C 2.00024800 2.18306700 -3.02443000  
N 2.98135000 0.14354200 -2.08027600  
C 5.91966900 3.25912000 -1.42499000  
C 3.45647800 4.74822600 -5.03735700  
N 2.11537400 3.28052500 -3.71725000  
C 5.76019500 4.21508800 -5.50939300  
H 6.51690500 2.40751800 -4.68863900  
C 0.69070200 1.86133000 -2.40193300  
C 1.78406000 -0.16066400 -1.49483600  
O 4.81730700 3.10948600 -0.93594800  
C 6.62357200 4.57585600 -1.60392600  
C 4.64656300 5.09807600 -5.64137700  
H 2.58468700 5.39079300 -5.10375900  
C 7.07919300 4.56891500 -6.13923200  
O -0.31252800 2.56351200 -2.52541900  
N 0.69213900 0.70602200 -1.67296800  
O 1.62149500 -1.17009400 -0.80279600  
H 6.51523000 4.88680800 -2.64823800  
H 6.16678600 5.32648400 -0.95992200  
H 7.69002000 4.48178000 -1.39162100  
C 4.77405900 6.38333900 -6.41427300  
H 7.82973500 3.79952500 -5.94990500  
H 6.97593700 4.69041600 -7.22321100  
H 7.45612000 5.52114400 -5.74972200  
H -0.21648700 0.35945400 -1.34909700  
H 5.54820900 7.02975200 -5.98614800  
H 5.05759100 6.19542000 -7.45575000  
H 3.83154300 6.93436700 -6.41229500  
H 4.97433100 -0.41779100 -3.12185800

**(2.B\*.m)-[K<sub>2</sub>S<sub>2</sub>O<sub>4</sub>], TRIPLET, T<sub>1</sub>'**

S -0.27200200 -1.02571700 -4.75667500  
O -0.87859100 -1.75342900 -5.88082700  
O 0.28618500 -1.88861200 -3.69492200  
O 0.52695900 0.16492600 -5.09436200  
S -2.97544500 -0.61432700 -1.92989000  
O -1.73206600 -0.72647700 -1.11940300  
O -3.99783300 -1.62411500 -1.63257400

O -3.44110400 0.77392900 -2.11116400  
K -0.32986500 -3.05919000 -1.39646800  
K -2.43164300 2.44439100 -4.04321700  
O -2.55020800 -1.14494600 -3.49791100  
O -1.58334100 -0.17879100 -4.01789000  
C 5.43331300 0.60940700 -3.19118500  
N 4.31099700 1.50360600 -3.49950300  
H 6.13856300 0.63263900 -4.01787300  
C 6.10480500 0.97917400 -1.86841000  
C 4.47307500 2.67110600 -4.21433400  
C 3.06355500 1.24197300 -2.89177100  
H 5.39761400 0.88076000 -1.04484900  
H 6.96374000 0.32593600 -1.70777700  
O 6.62553500 2.32101100 -1.90362400  
C 3.33626900 3.56796700 -4.32638800  
C 5.70255300 3.02769700 -4.81059100  
C 2.01529800 2.17722900 -3.06370400  
N 2.98455100 0.11574800 -2.20811200  
C 5.82587200 3.30860300 -1.42725800  
C 3.52783700 4.75798600 -5.04111700  
N 2.11838500 3.32791100 -3.76849200  
C 5.86174700 4.21176000 -5.50880000  
H 6.56104300 2.38016500 -4.70615800  
C 0.73594000 1.83962500 -2.45054200  
C 1.78216200 -0.21505700 -1.60140600  
O 4.72053100 3.11209800 -0.96254300  
C 6.47992800 4.65167900 -1.59477100  
C 4.74463900 5.09994900 -5.62999300  
H 2.67849800 5.42801100 -5.11779200  
C 7.18875600 4.56155700 -6.12232300  
O -0.28225900 2.53939300 -2.52745600  
N 0.71788000 0.64932200 -1.74408200  
O 1.67366500 -1.25970600 -0.94862400  
H 6.43915500 4.92953000 -2.65296300  
H 5.94493400 5.39640900 -1.00690200  
H 7.53077600 4.61123000 -1.30149800  
C 4.88373300 6.39051800 -6.37728100  
H 7.92507500 3.77768300 -5.93532700  
H 7.10297600 4.69740600 -7.20631300  
H 7.57983800 5.50071800 -5.71487800  
H -0.19476600 0.32001700 -1.41201400  
H 5.66730700 7.01544600 -5.93286600  
H 5.18402800 6.20980800 -7.41609100  
H 3.94926000 6.95330300 -6.37849900  
H 5.03969000 -0.40136800 -3.10536200

**(2.A.m)-(1a)\_1plus,**

C -10.53619500 -1.38696200 2.30897800  
C -9.24832400 -1.06709300 2.70508200  
C -8.42437500 -0.23383800 1.93381000  
C -8.93684500 0.33189500 0.71065200  
C -10.26264900 0.03375600 0.33136000  
C -11.05094500 -0.81108400 1.09109900  
N -7.16190300 0.02195800 2.37813500  
N -8.11044900 1.13849300 -0.02528700  
C -6.80754600 1.38430800 0.39513000  
C -6.38783200 0.75039600 1.63419500  
C -4.97598200 0.97277200 2.06905000

O -4.48968800 0.46841200 3.06680800  
N -4.27277600 1.79848600 1.22164200  
C -4.74768300 2.40930100 0.05434300  
N -6.06556800 2.16746000 -0.32972900  
H -8.83387700 -1.46528700 3.62331200  
H -10.69095000 0.47038400 -0.55821200  
H -3.30463500 1.98604200 1.46022000  
O -4.01398700 3.12775900 -0.60246100  
C -12.44578600 -1.13109600 0.64620100  
H -12.69413300 -0.61641000 -0.28239800  
H -12.56177100 -2.20897900 0.48913400  
H -13.17295800 -0.84202100 1.41238900  
C -11.38743100 -2.29965000 3.13605300  
H -12.29340400 -1.78453800 3.47487500  
H -11.71657000 -3.16473800 2.55047700  
H -10.84369000 -2.65809700 4.01065700  
C -8.60565300 1.92781700 -1.17383400  
H -7.78151400 2.03424100 -1.87638400  
H -9.40922700 1.38177500 -1.65790300  
C -9.05701900 3.31451500 -0.71899100  
H -8.22461300 3.86370400 -0.27963500  
H -9.44852000 3.85387600 -1.58210900  
O -10.14073500 3.22958800 0.22395000  
C -9.81644600 3.21915200 1.54259600  
O -8.67015400 3.22448500 1.94767300  
C -11.05102100 3.16151700 2.39609800  
H -11.55128900 2.20118500 2.23746200  
H -10.77596300 3.26056300 3.44493700  
H -11.75045000 3.94937600 2.10736500  
O -5.58028400 -1.30457900 -0.00643300  
C -6.20850200 -2.29906300 0.37311500  
N -7.42810600 -2.53946800 -0.25055800  
C -7.65081100 -1.84595900 -1.53517100  
C -8.46801300 -3.46802500 0.17190200  
C -8.96518900 -2.26249600 -2.18089000  
H -7.59363600 -0.76736200 -1.37542500  
H -6.80564900 -2.09339900 -2.18791000  
C -8.82979700 -4.47645500 -0.93237300  
H -8.16807000 -3.97022200 1.08264800  
H -9.35683400 -2.87190800 0.42235000  
C -9.05034000 -3.78985800 -2.30249100  
H -9.81217100 -1.87690200 -1.60378600  
H -9.01845200 -1.78952500 -3.16512300  
H -9.73007700 -4.99983800 -0.59922000  
H -8.03034500 -5.21901900 -1.00092600  
H -10.01792900 -4.07332100 -2.72406200  
H -8.28454200 -4.12462300 -3.00966600  
C -5.60991500 -3.26319600 1.42130100  
C -6.33133600 -3.17953600 2.78518400  
H -7.37680100 -3.49110700 2.75187500  
H -5.81684500 -3.84132200 3.48801900  
H -6.28899500 -2.16185900 3.17864600  
C -5.59611100 -4.71143300 0.88086400  
H -4.99493700 -5.32805700 1.55479500  
H -6.58398900 -5.16900600 0.82243300  
H -5.13913900 -4.75554300 -0.11230200  
C -4.14819900 -2.82571100 1.64466800  
H -4.09369700 -1.81589800 2.05322200

H -3.68212800 -3.51368800 2.35565100  
H -3.57819800 -2.85258600 0.71280200

**(2.A.m)–(1a), singlet**

C -10.78948900 -1.29715400 2.36253700  
C -9.47990800 -1.06581100 2.73505900  
C -8.62058300 -0.25145500 1.96798500  
C -9.10841500 0.36170400 0.78238800  
C -10.44430700 0.13732900 0.41195800  
C -11.27539300 -0.67745000 1.17379100  
N -7.33217900 -0.08844300 2.38534500  
N -8.23379300 1.15592400 0.05087200  
C -6.92583700 1.31677000 0.44122900  
C -6.52903500 0.62496800 1.65308200  
C -5.10525900 0.74757400 2.06901700  
O -4.62351000 0.19436900 3.04971200  
N -4.37045400 1.55502600 1.23535900  
C -4.81957400 2.20774100 0.06851300  
N -6.13967700 2.07643300 -0.28684500  
H -9.06362500 -1.51653200 3.62958400  
H -10.86163100 0.61359400 -0.46328400  
H -3.38743900 1.66825100 1.45472800  
O -4.01504400 2.87002600 -0.57790300  
C -12.69575100 -0.90207300 0.73428300  
H -12.91828300 -0.35815100 -0.18532600  
H -12.88594100 -1.96681500 0.55917900  
H -13.40182500 -0.57799400 1.50667900  
C -11.68242500 -2.18579600 3.18578400  
H -12.56775700 -1.64533400 3.53838900  
H -12.04274300 -3.03821400 2.59926200  
H -11.15012400 -2.57304100 4.05677600  
C -8.68967600 1.92187400 -1.12085200  
H -7.85013800 1.99088700 -1.81113500  
H -9.49641800 1.37892800 -1.60632700  
C -9.11493400 3.33083100 -0.72221100  
H -8.28119800 3.86636600 -0.26892300  
H -9.47090400 3.86622100 -1.60348400  
O -10.22593100 3.29128500 0.19623800  
C -9.93926600 3.32980100 1.52127400  
O -8.81216600 3.42652800 1.96479200  
C -11.19196800 3.19285600 2.34192700  
H -11.49380300 2.14017800 2.33918600  
H -10.99524300 3.50431700 3.36713400  
H -12.00793000 3.77562000 1.91079000  
O -5.25243200 -1.43846400 -0.19360300  
C -5.94270000 -2.37707400 0.23578700  
N -7.16534600 -2.59904900 -0.33070300  
C -7.47841300 -1.79986400 -1.53361700  
C -8.26453500 -3.42282900 0.17728400  
C -8.78930100 -2.25434400 -2.17809700  
H -7.50731000 -0.73801700 -1.28569600  
H -6.65109800 -1.92994000 -2.23907800  
C -8.75788600 -4.42574400 -0.87480100  
H -7.95789500 -3.93409700 1.08170100  
H -9.08313700 -2.75460200 0.46776900  
C -8.82680100 -3.78205600 -2.28140100  
H -9.64742000 -1.89067100 -1.60140800  
H -8.86049700 -1.79110100 -3.16709800

H -9.74509900 -4.78003700 -0.55943000  
H -8.09604300 -5.29746900 -0.89229300  
H -9.72402200 -4.11227400 -2.81314400  
H -7.96836300 -4.10840600 -2.88026400  
C -5.36682400 -3.32346500 1.32415800  
C -6.05266800 -3.13339400 2.69523300  
H -7.11477300 -3.38578700 2.69377700  
H -5.56206200 -3.78330300 3.42792500  
H -5.95567400 -2.09900200 3.03016500  
C -5.43498200 -4.79528900 0.86097400  
H -4.88146100 -5.42051300 1.56889900  
H -6.44977600 -5.19052200 0.80416000  
H -4.97247700 -4.91388500 -0.12419600  
C -3.87991800 -2.95883900 1.50437900  
H -3.76659400 -1.93084500 1.85073500  
H -3.43635700 -3.62911400 2.24787900  
H -3.32815300 -3.06868600 0.56732500

**(2.B\*.m)–(1a)\_triplet**

C -10.54261300 -1.32573900 2.32149500  
C -9.25602200 -1.00021100 2.72514300  
C -8.39972900 -0.18345500 1.96090200  
C -8.92823800 0.35950100 0.72424000  
C -10.24299000 0.04311200 0.33461200  
C -11.05135000 -0.79098200 1.09147000  
N -7.14927100 0.05826500 2.41977600  
N -8.10793500 1.18293600 -0.02605200  
C -6.78242900 1.40363600 0.40093900  
C -6.35611800 0.80359600 1.61136400  
C -4.95840100 0.98997400 1.98630100  
O -4.42053700 0.51333400 2.98687400  
N -4.23388900 1.78207700 1.09925700  
C -4.71367400 2.37805300 -0.05662400  
N -6.04094600 2.15159500 -0.39245700  
H -8.86016900 -1.39021200 3.65558200  
H -10.65467700 0.46051400 -0.57302800  
H -3.25962900 1.94269300 1.32608100  
O -3.98407500 3.07649200 -0.75897300  
C -12.43958200 -1.12962100 0.62648500  
H -12.66746500 -0.63447100 -0.31932700  
H -12.55571400 -2.20991200 0.48215500  
H -13.19296700 -0.82578600 1.36200000  
C -11.39559600 -2.22873000 3.16187100  
H -12.31966100 -1.72440700 3.46716500  
H -11.69695300 -3.11802500 2.59657000  
H -10.86491200 -2.55256500 4.05853500  
C -8.61852700 1.98307000 -1.14564000  
H -7.80036700 2.13336100 -1.84711000  
H -9.40445600 1.42733100 -1.65072800  
C -9.11538000 3.34956700 -0.67683200  
H -8.29929000 3.91912600 -0.23182100  
H -9.53419000 3.89318800 -1.52508700  
O -10.18591100 3.21012000 0.27661000  
C -9.85095200 3.22128400 1.59092900  
O -8.71596300 3.37940000 1.99495100  
C -11.05969300 2.97439600 2.45046400  
H -11.33482200 1.91770200 2.37070600  
H -10.82651700 3.20817700 3.48842200

H -11.90958700 3.56589300 2.10414700  
O -5.45428400 -1.44510900 -0.11420300  
C -6.16784400 -2.36057600 0.32153200  
N -7.38480200 -2.56493800 -0.27731900  
C -7.61998600 -1.81598100 -1.52888700  
C -8.46316300 -3.45819600 0.14470300  
C -8.92436600 -2.24133300 -2.19843200  
H -7.60454400 -0.74357700 -1.32693300  
H -6.77466100 -2.01311800 -2.19784000  
C -8.84509100 -4.45661500 -0.95681900  
H -8.17594400 -3.97941300 1.04919600  
H -9.33225600 -2.84362700 0.40670400  
C -8.98459100 -3.76645800 -2.33792100  
H -9.78350200 -1.87581300 -1.62574800  
H -8.97525200 -1.75805100 -3.17898500  
H -9.78491500 -4.93239400 -0.65856000  
H -8.08874900 -5.24618400 -1.00440000  
H -9.91590400 -4.06604700 -2.82722300  
H -8.16765100 -4.08580100 -2.99495000  
C -5.63052300 -3.29507600 1.43861300  
C -6.40794800 -3.16739000 2.76656200  
H -7.44466200 -3.50216000 2.70489700  
H -5.91160900 -3.78223600 3.52482000  
H -6.41114800 -2.12805300 3.10132500  
C -5.60650000 -4.75806800 0.94127700  
H -5.07950000 -5.37673500 1.67454900  
H -6.59897600 -5.18983600 0.80543900  
H -5.07130600 -4.83671200 -0.01055600  
C -4.17586100 -2.87101900 1.72214400  
H -4.12882900 -1.84577900 2.09279000  
H -3.75364900 -3.53770100 2.48100800  
H -3.56038000 -2.93782300 0.82173000

**(2.A.m)-[K<sub>2</sub>S<sub>2</sub>O<sub>8</sub>]- (1a), Singlet, S<sub>0</sub>**

S 2.06451200 -0.68474600 -5.86102100  
O 0.97567600 -1.33129000 -6.60835200  
O 2.31413900 -1.26774100 -4.52214900  
O 3.27854900 -0.35611100 -6.63045500  
S 0.15733800 1.80695100 -3.57989000  
O 1.14613500 1.22174300 -2.64539700  
O -1.25416600 1.58013400 -3.23444600  
O 0.50475700 3.17375500 -4.02445500  
K 1.75973100 -1.30308600 -1.96109500  
K 0.90805500 5.46078600 -2.68090400  
O 0.19989800 0.85093700 -4.98925200  
O 1.53356400 0.92643400 -5.58566100  
C 5.22355900 0.14133500 -4.18954600  
N 4.54378300 1.42823200 -3.94445200  
H 5.13375800 -0.10076900 -5.24271000  
C 6.66853500 0.19939800 -3.71226300  
C 4.50165600 2.41861500 -4.91486100  
C 4.05468600 1.65701500 -2.68875100  
H 6.71785700 0.41671900 -2.64530800  
H 7.15615500 -0.75374700 -3.92225100  
O 7.41414000 1.19563500 -4.44451700  
C 3.95129800 3.68446500 -4.56179600  
C 4.99478700 2.24274500 -6.21801600  
C 3.56060200 2.98566500 -2.41805200

N 4.05763500 0.66962000 -1.80838500  
C 7.50204100 2.43313600 -3.90073600  
C 3.88920800 4.71274900 -5.52857400  
N 3.50413600 3.94265900 -3.30367200  
C 4.92613600 3.26398300 -7.15513500  
H 5.43276600 1.30289400 -6.51472100  
C 3.07943200 3.27100800 -1.04271700  
C 3.51980000 0.88343300 -0.57348600  
O 7.02067700 2.73427800 -2.82549600  
C 8.22758500 3.37237600 -4.82435500  
C 4.35782100 4.53000600 -6.81196900  
H 3.46463200 5.66181300 -5.21787100  
C 5.45721200 3.03063400 -8.54248000  
O 2.65079400 4.36504500 -0.68315200  
N 3.14769600 2.18922600 -0.20404800  
O 3.31929100 -0.03216600 0.23155500  
H 7.54172400 3.66616200 -5.62597600  
H 8.53715400 4.26131100 -4.27591300  
H 9.08807500 2.88261400 -5.28371900  
C 4.28235400 5.63694600 -7.82855700  
H 5.86100200 2.02226300 -8.64830200  
H 4.66908000 3.16650000 -9.29144700  
H 6.24983700 3.74699900 -8.78536600  
H 2.76775200 2.30350000 0.72879300  
H 5.27811900 5.90793500 -8.19640200  
H 3.69254400 5.33526500 -8.70114400  
H 3.82311200 6.52975100 -7.39930000  
H 4.68472800 -0.62019600 -3.63181700  
O -0.45661700 4.64002400 -0.59977500  
C -0.36774200 4.39887400 0.61918700  
N -0.59617900 3.12980700 1.04645600  
C 0.02019100 5.53947000 1.59621200  
C -0.87306500 2.13365800 -0.01181900  
C -0.76293900 2.64872300 2.42021300  
C -1.18090600 5.92904900 2.48757800  
C 1.26968700 5.17286100 2.42824400  
C 0.38935100 6.77594600 0.75330900  
C -1.05744300 0.73205500 0.56791200  
H -1.74949600 2.44281300 -0.58907200  
C 0.13706800 1.43846600 2.69672100  
H -0.55036800 3.44238000 3.12506300  
H -1.81546200 2.37568300 2.56594900  
H -1.50809800 5.13238800 3.15726200  
H -0.90772800 6.78969200 3.10647200  
H -2.03681500 6.21805500 1.86895800  
H 1.59140000 6.05120200 2.99741300  
H 1.10774500 4.36622300 3.14408800  
H 2.08291900 4.87915300 1.75969900  
H -0.43177900 7.07409600 0.09814500  
H 0.61924200 7.61004200 1.42360700  
H 1.27256800 6.57987300 0.14098200  
C 0.06646000 0.39215900 1.55305300  
H -2.03214800 0.64338500 1.06176500  
H -1.07036600 0.02624300 -0.26849800  
H -0.17469400 1.00096100 3.65078900  
H 1.16748500 1.78588200 2.83248600  
H -0.08221600 -0.61238500 1.96166400  
H 1.01961700 0.36822800 1.01630900

H -0.02819100 2.13329100 -0.70263500

**(2.B\*.m)-[K<sub>2</sub>S<sub>2</sub>O<sub>8</sub>]- (1a), triplet, T<sub>1</sub>**

S -2.21606500 -1.27804600 -4.75422700  
O -3.06938700 -2.38223000 -5.21780400  
O -0.96339000 -1.70689900 -4.09402000  
O -2.09496100 -0.11335900 -5.64889000  
S -2.77282400 -0.75817900 -1.01782800  
O -1.29949300 -0.83681100 -1.19074700  
O -3.32967000 -1.71816600 -0.05602300  
O -3.29516600 0.62042500 -0.96053700  
K -0.31768000 -3.24115800 -1.98956100  
K -2.61071900 2.31034700 -3.03762100  
O -3.43242000 -1.41781300 -2.45325700  
O -3.14145100 -0.48121800 -3.53164900  
C 5.83442000 0.78609900 -3.08366000  
N 4.70764500 1.52576600 -3.66618200  
H 6.69807700 0.89082500 -3.73569600  
C 6.14611300 1.24393100 -1.65897200  
C 4.87927400 2.70726700 -4.35395300  
C 3.39591400 1.09374600 -3.36567900  
H 5.28298200 1.08746500 -1.01198600  
H 7.00390400 0.68300100 -1.28541200  
O 6.53508300 2.63154800 -1.62273800  
C 3.69589300 3.43102100 -4.77925100  
C 6.15853700 3.23615000 -4.63845100  
C 2.30578800 1.88324900 -3.80661800  
N 3.30213200 -0.04196700 -2.69737600  
C 5.56249500 3.53832400 -1.36531800  
C 3.89092300 4.63805400 -5.45751500  
N 2.42096300 3.01649900 -4.53352400  
C 6.32212900 4.43447900 -5.31067800  
H 7.04382500 2.71619400 -4.30255800  
C 0.97361900 1.42349600 -3.43094900  
C 2.04195800 -0.52452000 -2.37673300  
O 4.40414900 3.23084100 -1.15967300  
C 6.09250000 4.94262600 -1.41794700  
C 5.15955500 5.15537500 -5.73267700  
H 3.00390200 5.18052700 -5.76501100  
C 7.69878900 4.97315600 -5.58315000  
O -0.07392600 2.01753100 -3.70649100  
N 0.94539100 0.24414400 -2.70235500  
O 1.90775400 -1.61524100 -1.80665200  
H 6.11811100 5.26011700 -2.46561100  
H 5.42504600 5.60436900 -0.86676400  
H 7.10807600 4.99739200 -1.02344000  
C 5.29924800 6.45775600 -6.45710900  
H 8.46577900 4.30405700 -5.18883100  
H 7.87238400 5.09583600 -6.65811700  
H 7.83734700 5.95858100 -5.12444700  
H 0.02721200 -0.11929000 -2.43444100  
H 5.84437200 7.18597500 -5.84481800  
H 5.88077000 6.33147100 -7.37787900  
H 4.32628500 6.87845100 -6.71422300  
H 5.55634900 -0.26530400 -3.04972700  
O -1.31550400 4.12515100 -1.55446600  
C -0.21283500 4.28699100 -0.99384500  
N 0.24252400 3.31759800 -0.15741000

C 0.57738300 5.59685100 -1.24917500  
C -0.66927600 2.17500800 0.05873600  
C 1.55464400 3.22859500 0.50079700  
C 0.95966000 6.30643100 0.06751500  
C 1.81730500 5.32312600 -2.12949100  
C -0.34606600 6.54785300 -2.03553600  
C -0.22648000 1.32139800 1.24017000  
C 2.11197400 1.80723500 0.38207600  
H 2.25141000 3.91101000 0.03020600  
H 1.46150200 3.51650500 1.55590000  
H 1.69850400 5.76498800 0.65776400  
H 1.38339400 7.28859000 -0.16566100  
H 0.07565700 6.46432200 0.69433700  
H 2.28144800 6.27840800 -2.39892100  
H 2.58136300 4.71318000 -1.64645900  
H 1.53023800 4.81318600 -3.05276500  
H -1.25214600 6.78262700 -1.47070200  
H 0.18919900 7.48147000 -2.23519600  
H -0.64731300 6.10809000 -2.98827500  
C 1.18121100 0.74901200 1.01803000  
H -0.25421600 1.92384600 2.15583900  
H -0.95348500 0.51498300 1.36966400  
H 3.10731600 1.78979400 0.83365100  
H 2.25979400 1.60643800 -0.68076200  
H 1.59027100 0.39976400 1.97194600  
H 1.11595400 -0.12445800 0.36182300  
H -1.67786700 2.56292600 0.20906700  
H -0.69917300 1.55736900 -0.84163100

**(2.C.m)-[K<sub>2</sub>S<sub>2</sub>O<sub>8</sub>]\_1min, doublet**

S -0.83257000 -1.26260000 -4.88232000  
O -1.43624800 -2.22308300 -5.81903300  
O -0.04499700 -1.87658300 -3.79572100  
O -0.26175000 -0.03766300 -5.47513700  
S -3.09195000 -0.64078600 -1.75320400  
O -1.74939300 -0.68733500 -1.11861200  
O -4.08012600 -1.55893500 -1.17258300  
O -3.55496900 0.72471300 -2.06872600  
K -0.29058000 -2.97482300 -1.40560300  
K -2.38641200 2.22512700 -4.10571300  
O -2.91113700 -1.40697800 -3.27835300  
O -2.16744700 -0.48099800 -4.12215700  
C 5.52440600 0.66571000 -3.17233900  
N 4.39483300 1.54008500 -3.48410700  
H 6.25131700 0.71972200 -3.98133200  
C 6.16562000 1.00588400 -1.83038800  
C 4.57003000 2.73522800 -4.20671200  
C 3.15982400 1.23913400 -2.92837800  
H 5.43323900 0.91212000 -1.02923300  
H 7.01544700 0.34628000 -1.64324300  
O 6.70065800 2.34724700 -1.84264900  
C 3.43146500 3.57835600 -4.38930400  
C 5.80197000 3.12726400 -4.73907500  
C 2.09087200 2.14222900 -3.16653900  
N 3.08097100 0.11069600 -2.21356000  
C 5.91908500 3.33629800 -1.35075600  
C 3.61260600 4.77641700 -5.11953400  
N 2.19820200 3.29343000 -3.88735000

C 5.95677800 4.32100500 -5.45287000  
H 6.68414900 2.52392900 -4.57277200  
C 0.81179800 1.79637500 -2.58976300  
C 1.88477100 -0.23714700 -1.67851100  
O 4.84674800 3.15111400 -0.80942300  
C 6.54574600 4.68229400 -1.59687000  
C 4.83622900 5.16209000 -5.64955200  
H 2.73684700 5.40673600 -5.24668900  
C 7.31162000 4.70119000 -5.99298100  
O -0.23899400 2.46648900 -2.69748100  
N 0.79971300 0.61599300 -1.86833200  
O 1.71319400 -1.28583200 -1.01812500  
H 6.36433200 4.95562900 -2.64177000  
H 6.08889400 5.42697400 -0.94558000  
H 7.62586900 4.64664400 -1.44276700  
C 4.96939100 6.45641400 -6.41182000  
H 8.06097000 3.94485000 -5.74680400  
H 7.29466600 4.81560900 -7.08374400  
H 7.65454600 5.65965000 -5.58457200  
H -0.11116900 0.29052300 -1.54400900  
H 5.69611000 7.12854900 -5.94011400  
H 5.32045600 6.28625700 -7.43663700  
H 4.01196500 6.98025900 -6.46617200  
H 5.14994600 -0.35585800 -3.11575600

**MSX-1**

**MSX (T<sub>1</sub>)/S<sub>0</sub> (E = -4260.04863529 a.u.)**

S -3.503613 -2.164740 -1.883975  
O -4.702348 -2.916057 -2.285555  
O -2.999836 -2.489400 -0.531766  
O -2.471323 -1.962057 -2.914119  
S -4.606331 0.816891 0.307742  
O -3.481823 0.216266 1.075295  
O -5.862060 0.928147 1.059812  
O -4.216712 1.972651 -0.519837  
K -4.115921 -2.335740 1.892365  
K -2.282209 1.646245 -2.438642  
O -5.085853 -0.388079 -0.810382  
O -4.025175 -0.514631 -1.803437  
C 3.369324 -3.196634 1.736088  
N 2.716026 -2.578460 0.577618  
H 4.321551 -3.609873 1.400860  
C 3.559072 -2.296331 2.954783  
C 3.436448 -1.888241 -0.436280  
C 1.369710 -2.307151 0.608321  
H 2.605880 -1.887631 3.283952  
H 4.012734 -2.885786 3.753276  
O 4.486145 -1.213180 2.712237  
C 2.760577 -1.555563 -1.669656  
C 4.792314 -1.602848 -0.329800  
C 0.866298 -1.766159 -0.638063  
N 0.663258 -2.356837 1.701332  
C 3.959172 -0.033146 2.318445  
C 3.481324 -0.889789 -2.689811  
N 1.498287 -2.085584 -1.862546  
C 5.483836 -0.931405 -1.347467  
H 5.335127 -1.869873 0.566272  
C -0.122376 -0.702420 -0.503164

C -0.600156 -1.761425 1.662614  
O 2.767489 0.143514 2.151718  
C 5.022303 1.000451 2.074557  
C 4.812503 -0.555868 -2.549123  
H 2.941255 -0.642233 -3.597343  
C 6.937673 -0.608937 -1.157591  
O -0.418530 0.109285 -1.378790  
N -0.831994 -0.796471 0.687152  
O -1.448253 -2.003907 2.518149  
H 5.203683 1.050958 0.996476  
H 4.660255 1.977549 2.397359  
H 5.955332 0.749067 2.578257  
C 5.542300 0.178604 -3.640314  
H 7.299290 -0.963547 -0.191079  
H 7.549006 -1.065468 -1.944246  
H 7.110125 0.471968 -1.215656  
H -1.746420 -0.330862 0.717590  
H 5.923833 1.140125 -3.279078  
H 6.404754 -0.391354 -4.001613  
H 4.881841 0.373591 -4.487298  
H 2.742691 -4.034573 2.050659  
O -0.624267 3.375501 -1.278119  
C 0.274817 3.237848 -0.423536  
N -0.084241 3.066882 0.874445  
C 1.757217 3.287397 -0.878715  
C -1.535911 3.144697 1.152927  
C 0.788838 2.824087 2.031566  
C 2.573794 4.336003 -0.092693  
C 2.393837 1.883715 -0.795924  
C 1.773375 3.707293 -2.361744  
C -1.818398 3.198568 2.649424  
C 0.224966 1.717483 2.928302  
H 1.769099 2.512404 1.692905  
H 0.910688 3.755370 2.599224  
H 2.763295 4.058564 0.943737  
H 3.546161 4.466323 -0.577633  
H 2.066588 5.306372 -0.095949  
H 3.422466 1.926909 -1.168887  
H 2.421347 1.464694 0.210271  
H 1.836476 1.191794 -1.429640  
H 1.339468 4.700562 -2.503585  
H 2.809535 3.728123 -2.713659  
H 1.211058 3.001898 -2.976573  
C -1.237213 1.974231 3.366228  
H -1.405081 4.121761 3.072623  
H -2.902891 3.249452 2.789714  
H 0.889793 1.623527 3.791815  
H 0.304041 0.778924 2.379535  
H -1.300751 2.115690 4.450063  
H -1.849793 1.099978 3.122538  
H -1.935381 4.025807 0.643853  
H -2.036369 2.277886 0.716332

**(2.E.m)-[K<sub>2</sub>S<sub>2</sub>O<sub>8</sub>]-{1a'}, triplet, (T)-1**

S -1.50451100 -1.06447400 -4.83061000  
O -2.48311500 -1.84530900 -5.60347800  
O -0.61987200 -1.87438800 -3.96784500  
O -0.85794600 0.05734100 -5.53060600

S -2.88769200 -0.54723000 -1.27011400  
O -1.41841300 -0.67263400 -1.10175800  
O -3.68330700 -1.56622500 -0.57306900  
O -3.38023800 0.84349000 -1.18281500  
K -0.26331100 -3.05094700 -1.61805300  
K -2.64140200 2.66021900 -3.07031700  
O -3.20868500 -1.02233900 -2.87786900  
O -2.46779700 -0.11387200 -3.74867900  
C 5.73544500 0.75983200 -3.44956100  
N 4.57818400 1.56675000 -3.85471200  
H 6.52746300 0.88353300 -4.18484300  
C 6.21166100 1.11272200 -2.04295900  
C 4.74243800 2.79390900 -4.52458500  
C 3.33407000 1.16910800 -3.39942200  
H 5.41982400 0.92835300 -1.31769100  
H 7.09433900 0.52060100 -1.79592600  
O 6.62472100 2.49371600 -1.96902500  
C 3.60529700 3.58850400 -4.81477300  
C 5.99339100 3.28841100 -4.91530500  
C 2.22793200 1.99008900 -3.69636000  
N 3.23414500 0.04151600 -2.70624000  
C 5.70898800 3.39261800 -1.53505000  
C 3.74151000 4.81797800 -5.47107300  
N 2.37024100 3.13549300 -4.41554500  
C 6.13340700 4.51320000 -5.56728300  
H 6.89089400 2.73544100 -4.67971900  
C 0.92929700 1.66175800 -3.17077700  
C 2.00940600 -0.34237400 -2.24200000  
O 4.59292900 3.09086700 -1.16000000  
C 6.24353700 4.79522800 -1.62425700  
C 4.98679600 5.29615000 -5.85389300  
H 2.84674800 5.40003800 -5.66982800  
C 7.50499700 5.00196000 -5.94995200  
O -0.05847300 2.39309900 -3.34941900  
N 0.90473200 0.49966400 -2.44208800  
O 1.83818700 -1.40494300 -1.62262200  
H 6.11262400 5.14587600 -2.65349100  
H 5.67977400 5.44527300 -0.95563300  
H 7.30873300 4.82851400 -1.39037900  
C 5.11374000 6.62428500 -6.55041700  
H 8.27602200 4.28678700 -5.65652200  
H 7.58184900 5.16218900 -7.03131900  
H 7.73070900 5.96193700 -5.47193400  
H 0.00841200 0.18901800 -2.05551400  
H 5.74461800 7.31346100 -5.97799100  
H 5.58031400 6.51258500 -7.53559000  
H 4.13672700 7.09209700 -6.68780800  
H 5.42414000 -0.28423200 -3.45345600  
O -1.53630900 4.02842400 -1.06721500  
C -0.36600000 4.14135000 -0.65374100  
N 0.11258000 3.18318800 0.21953400  
C 0.49725000 5.34291700 -1.11127600  
C -0.67457000 2.07913800 0.51587200  
C 1.39533100 3.22167500 0.94554200  
C 0.54413100 6.39109400 0.02405200  
C 1.93208200 4.95828200 -1.56196700  
C -0.22177800 5.96798600 -2.32370600  
C -0.15424300 1.07321400 1.48036600

C 2.15420600 1.90648800 0.74667700  
H 1.98935900 4.05883500 0.60715400  
H 1.17521100 3.38142800 2.00750600  
H 1.03698400 6.00815400 0.92167300  
H 1.09828600 7.27383700 -0.31169100  
H -0.46643700 6.70839500 0.30028500  
H 2.22918600 5.57789400 -2.41332000  
H 2.68606100 5.11221000 -0.78891300  
H 2.00074100 3.91665500 -1.87253300  
H -1.24404900 6.25923000 -2.07807000  
H 0.33091200 6.85407600 -2.65060900  
H -0.26107700 5.25584200 -3.15300100  
C 1.31420800 0.68021800 1.18171700  
H -0.20907000 1.45907100 2.51279400  
H -0.79757500 0.19116100 1.44366900  
H 3.09152600 1.96636500 1.30767500  
H 2.43348400 1.83480300 -0.30718000  
H 1.74643600 0.21508800 2.07416600  
H 1.32521400 -0.07267100 0.39109700  
H -1.60750900 1.98467600 -0.01229200  
H 1.53136000 3.68792700 -4.56337100

**(2.F.m)-[K<sub>2</sub>S<sub>2</sub>O<sub>8</sub>]- (1.A), singlet, (S)-1**

S -1.45083900 -1.07829900 -4.80801700  
O -2.44883400 -1.86417500 -5.54930600  
O -0.61900500 -1.86582000 -3.87605300  
O -0.74429000 -0.02862700 -5.56063700  
S -2.96935900 -0.32171200 -1.35239900  
O -1.57133800 -0.73007900 -1.05580400  
O -4.00825400 -1.11217400 -0.68453400  
O -3.14841400 1.14847700 -1.34200700  
K -0.28013500 -3.03634900 -1.52528000  
K -2.59174500 2.74271700 -3.50040000  
O -3.26776000 -0.79627600 -2.95803500  
O -2.38901200 -0.01032100 -3.81662600  
C 5.59469800 0.62523300 -3.58524900  
N 4.42492900 1.42726600 -3.93201100  
H 6.36620900 0.78477400 -4.33904500  
C 6.13662100 0.88407600 -2.17995600  
C 4.57804200 2.73673600 -4.48030900  
C 3.20144200 1.06967800 -3.36574000  
H 5.35930000 0.69720100 -1.44108400  
H 6.99901900 0.24046200 -1.99245700  
O 6.62380800 2.23848400 -2.03557000  
C 3.42655100 3.51114800 -4.74681600  
C 5.82368400 3.29293800 -4.77497100  
C 2.09122400 1.87150900 -3.62155100  
N 3.16871600 -0.03498900 -2.59984000  
C 5.78942600 3.14932700 -1.49142800  
C 3.56845400 4.80582400 -5.24535400  
N 2.16470500 2.94365600 -4.54635600  
C 5.96771800 4.58670800 -5.29981700  
H 6.72550300 2.73851500 -4.55554400  
C 0.90069500 1.62455500 -2.92535600  
C 1.99754200 -0.38769500 -2.02102300  
O 4.69199700 2.88294600 -1.03927400  
C 6.37823100 4.53254900 -1.55003100  
C 4.82117100 5.36166400 -5.53173600



|   |             |             |             |   |           |           |           |
|---|-------------|-------------|-------------|---|-----------|-----------|-----------|
| H | 2.66868900  | 5.38953600  | -5.42492800 | O | -4.471686 | 1.705454  | -0.658152 |
| C | 7.34612000  | 5.13199800  | -5.58117900 | K | -3.965764 | -2.426381 | 2.186491  |
| O | -0.11767700 | 2.37841100  | -2.94719600 | K | -2.632404 | 1.546451  | -2.660527 |
| N | 0.90913800  | 0.47847600  | -2.13893300 | O | -5.156168 | -0.689169 | -1.106934 |
| O | 1.84831400  | -1.44093700 | -1.35247000 | O | -3.906848 | -0.859300 | -1.840435 |
| H | 6.11639000  | 4.96653300  | -2.52073900 | C | 3.337024  | -2.742865 | 1.776735  |
| H | 5.94866400  | 5.14840800  | -0.75971100 | N | 2.876492  | -2.007677 | 0.597826  |
| H | 7.46611200  | 4.50672400  | -1.47249500 | H | 4.178774  | -3.372157 | 1.492939  |
| C | 4.92474100  | 6.76553100  | -6.07189800 | C | 3.694831  | -1.818511 | 2.938225  |
| H | 8.11735500  | 4.39625400  | -5.33929900 | C | 3.788327  | -1.572111 | -0.392834 |
| H | 7.46639700  | 5.40966800  | -6.63539400 | C | 1.552214  | -1.593727 | 0.569709  |
| H | 7.55097900  | 6.03594700  | -4.99452900 | H | 2.820661  | -1.248601 | 3.250821  |
| H | 0.00721500  | 0.13660300  | -1.80728000 | H | 4.081122  | -2.405360 | 3.773544  |
| H | 5.52032400  | 7.40752700  | -5.41178900 | O | 4.754660  | -0.910574 | 2.564710  |
| H | 5.41544800  | 6.78545200  | -7.05245400 | C | 3.313451  | -0.804783 | -1.486002 |
| H | 3.93715200  | 7.22069100  | -6.18113000 | C | 5.154735  | -1.862373 | -0.346810 |
| H | 5.30184500  | -0.42479500 | -3.62528300 | C | 1.118412  | -0.821967 | -0.517950 |
| O | -1.49587000 | 4.26225400  | -1.04095400 | N | 0.754993  | -1.958311 | 1.575692  |
| C | -0.30839700 | 4.28218800  | -0.83340000 | C | 4.396386  | 0.321804  | 2.133505  |
| N | 0.20115600  | 3.23398900  | 0.09823600  | C | 4.204933  | -0.354879 | -2.465217 |
| C | 0.65240100  | 5.31464200  | -1.42251000 | N | 1.971019  | -0.510828 | -1.555528 |
| C | -0.43259200 | 2.09782500  | 0.12169600  | C | 6.046329  | -1.422448 | -1.330666 |
| C | 1.34109000  | 3.40528100  | 1.03596700  | H | 5.560455  | -2.411245 | 0.490580  |
| C | 0.67784500  | 6.53256000  | -0.46244500 | C | -0.219620 | -0.337543 | -0.551330 |
| C | 2.07867600  | 4.78250000  | -1.67731600 | C | -0.547215 | -1.566831 | 1.556215  |
| C | 0.02847300  | 5.75844400  | -2.76298300 | O | 3.252712  | 0.733191  | 2.131842  |
| C | -0.04829700 | 1.04688600  | 1.08272300  | C | 5.588385  | 1.084896  | 1.627435  |
| C | 2.25118400  | 2.17964200  | 0.93486200  | C | 5.564705  | -0.650107 | -2.408562 |
| H | 1.85868800  | 4.32491200  | 0.79796000  | H | 3.812448  | 0.240151  | -3.284542 |
| H | 0.90973300  | 3.50833000  | 2.03664300  | C | 7.508617  | -1.767550 | -1.222194 |
| H | 1.08461100  | 6.28620100  | 0.52147000  | O | -0.659396 | 0.388102  | -1.470115 |
| H | 1.31442100  | 7.30373500  | -0.90491300 | N | -0.985979 | -0.721094 | 0.530814  |
| H | -0.32549800 | 6.94503800  | -0.32797900 | O | -1.363952 | -1.913866 | 2.433790  |
| H | 2.53583100  | 5.37440700  | -2.47406800 | H | 5.806429  | 0.742593  | 0.610502  |
| H | 2.73808000  | 4.86141100  | -0.81387500 | H | 5.359081  | 2.149650  | 1.604446  |
| H | 2.08126600  | 3.74370000  | -2.00266200 | H | 6.469458  | 0.892268  | 2.241397  |
| H | -0.97471200 | 6.16434600  | -2.62184600 | C | 6.497590  | -0.144615 | -3.476953 |
| H | 0.66095700  | 6.52858700  | -3.21071300 | H | 7.706762  | -2.366274 | -0.330555 |
| H | -0.03573000 | 4.90767400  | -3.44449700 | H | 7.852001  | -2.336260 | -2.094315 |
| C | 1.48516200  | 0.88988800  | 1.27740100  | H | 8.131060  | -0.866702 | -1.171151 |
| H | -0.50404400 | 1.36948500  | 2.03398600  | H | -1.975350 | -0.467158 | 0.527643  |
| H | -0.53410800 | 0.11488700  | 0.79934000  | H | 7.286493  | 0.486236  | -3.051857 |
| H | 3.09719300  | 2.32616100  | 1.61022400  | H | 6.999485  | -0.971331 | -3.992576 |
| H | 2.65994000  | 2.13921300  | -0.07606100 | H | 5.959597  | 0.443782  | -4.223317 |
| H | 1.66250400  | 0.59875800  | 2.31488900  | H | 2.522008  | -3.389605 | 2.101206  |
| H | 1.82119100  | 0.07006400  | 0.63992900  | O | -1.301217 | 3.327247  | -1.085654 |
| H | -1.27908000 | 1.97837800  | -0.54917100 | C | -0.346142 | 3.277453  | -0.311374 |
| H | 1.39942800  | 3.59825200  | -4.44289900 | N | -0.618126 | 2.891337  | 1.028039  |

## MSX-2

MSX (T)-1/S<sub>0</sub> (E = -4260.09988392 a.u.)

|   |           |           |           |   |           |          |           |
|---|-----------|-----------|-----------|---|-----------|----------|-----------|
| S | -3.440243 | -2.529157 | -1.760539 | C | 0.311243  | 3.013806 | 2.174015  |
| O | -4.565622 | -3.252686 | -2.372140 | C | 1.413150  | 5.068957 | -0.335335 |
| O | -3.233890 | -2.816719 | -0.326570 | C | 2.164490  | 2.628754 | -0.306572 |
| O | -2.215750 | -2.411485 | -2.568632 | C | 1.041205  | 3.590066 | -2.325997 |
| S | -4.897781 | 0.500650  | 0.087166  | C | -2.208197 | 2.144558 | 2.733034  |
| O | -3.840705 | -0.038648 | 0.978904  | C | 0.304025  | 1.714257 | 2.980903  |
| O | -6.247067 | 0.533591  | 0.663923  | H | 1.304309  | 3.238381 | 1.812967  |
|   |           |           |           | H | -0.028135 | 3.857406 | 2.785237  |

H 1.440762 5.173684 0.751975  
H 2.397353 5.348412 -0.724031  
H 0.678787 5.778217 -0.727816  
H 2.918074 2.511691 -1.090160  
H 2.692460 2.956779 0.589202  
H 1.753996 1.642079 -0.097746  
H 0.297250 4.279937 -2.726924  
H 2.025681 3.868022 -2.712237  
H 0.797226 2.583630 -2.676766  
C -1.104774 1.370421 3.503880  
H -2.378457 3.110553 3.238945  
H -3.155675 1.605940 2.751224  
H 1.018466 1.817852 3.801469  
H 0.687891 0.921012 2.336903  
H -1.194139 1.612738 4.566832  
H -1.286522 0.299527 3.393623  
H -2.545674 2.316507 0.508464  
H 1.606033 0.096829 -2.277883

**(2.F.m)-[K<sub>2</sub>S<sub>2</sub>O<sub>8</sub>]<sub>1</sub>min, singlet, (S)-2**

S 0.70859200 -1.38917000 -4.78163700  
O 0.27261700 -2.35334700 -5.80296700  
O 1.44212600 -1.98182200 -3.64768200  
O 1.23909800 -0.10258500 -5.28294400  
S -1.71427700 -0.92455600 -1.76857400  
O -0.42751100 -1.01699200 -1.03923200  
O -2.77346500 -1.81904600 -1.27886100  
O -2.11548000 0.45575800 -2.10616600  
K 1.32274200 -3.04648000 -1.25030800  
K -0.38605100 1.97637200 -3.83769800  
O -1.44903100 -1.68227700 -3.29616500  
O -0.73756300 -0.72550200 -4.12752200  
C 5.77264600 0.63839900 -4.35628900  
N 4.66384000 1.55011400 -4.10064500  
H 6.08827500 0.74799800 -5.39441900  
C 6.95264700 0.81717200 -3.40394000  
C 4.59481500 2.82400200 -4.72891900  
C 3.80609600 1.26255400 -3.03927000  
H 6.62264200 0.69085000 -2.37397300  
H 7.73562700 0.09323800 -3.64116500  
O 7.56475600 2.11774500 -3.55873500  
C 3.50006100 3.67510600 -4.46112600  
C 5.57520300 3.27893300 -5.61524600  
C 2.75354300 2.13200000 -2.77315400  
N 4.04076200 0.13180800 -2.35131900  
C 7.17871000 3.09700100 -2.71095600  
C 3.44254300 4.92991900 -5.06520200  
N 2.45595900 3.24120500 -3.62160500  
C 5.51187600 4.53690200 -6.23190700  
H 6.44660200 2.66865500 -5.80847600  
C 1.84937700 1.82457300 -1.74129200  
C 3.17760100 -0.22416500 -1.37168500  
O 6.41717700 2.93129800 -1.77801900  
C 7.79442200 4.41455800 -3.10051600  
C 4.42770800 5.38264400 -5.94982700  
H 2.59257800 5.56929500 -4.83742800  
C 6.61205000 4.96878600 -7.16974900  
O 0.82388800 2.50648100 -1.46023400

N 2.14301300 0.65348100 -1.04973300  
O 3.25955900 -1.30383600 -0.73657800  
H 7.20010200 4.83780100 -3.91710900  
H 7.77279100 5.09758500 -2.25151200  
H 8.81563600 4.28108600 -3.46187800  
C 4.32055600 6.74974400 -6.57664000  
H 7.37602100 4.19297400 -7.26459700  
H 6.22733100 5.18536100 -8.17377300  
H 7.10545400 5.88382900 -6.82014700  
H 1.41261900 0.30217600 -0.44165800  
H 5.18178100 7.37881200 -6.32101500  
H 4.29145300 6.69059800 -7.67133400  
H 3.41703800 7.26702000 -6.24407600  
H 5.40425600 -0.37985500 -4.22385300  
H 2.01096100 3.99246400 -3.10345600

**(2.F.m)-[K<sub>2</sub>S<sub>2</sub>O<sub>8</sub>]<sub>1</sub>min, triplet, (S)-2 (t)**

S -1.03893400 -1.58330500 -4.39262600  
O -1.81078500 -2.63327000 -5.07422100  
O 0.21126700 -2.04352500 -3.76013400  
O -0.95987800 -0.27720600 -5.08119200  
S -1.64597800 -1.24921800 -0.59634200  
O -0.16613000 -1.18764200 -0.68371800  
O -2.16979600 -2.23346200 0.35991900  
O -2.29634100 0.07612700 -0.61605500  
K 1.13121100 -3.37085000 -1.67207500  
K -1.79917100 1.68980400 -2.84684900  
O -2.16650300 -2.01670500 -2.04704800  
O -2.05538700 -1.03287100 -3.11103300  
C 6.40840400 0.84628000 -4.37197800  
N 5.17794900 1.63569700 -4.38020200  
H 6.97567600 1.05036200 -5.27842100  
C 7.24847000 1.11012900 -3.12433500  
C 5.13322900 2.88818300 -4.97299500  
C 4.11313600 1.14454700 -3.62714900  
H 6.67686600 0.86898700 -2.22849600  
H 8.16476600 0.51701700 -3.15818900  
O 7.66615800 2.48905300 -3.07907800  
C 3.93018000 3.68054200 -4.85695500  
C 6.20069200 3.46718500 -5.70060800  
C 2.92553000 1.95011700 -3.52990500  
N 4.19215000 -0.09672500 -3.06743000  
C 6.89134400 3.35060900 -2.37408700  
C 3.85084900 4.94194600 -5.45806600  
N 2.87227700 3.16457600 -4.13612500  
C 6.11509700 4.72094300 -6.28486100  
H 7.14144800 2.93825900 -5.77911900  
C 1.81652700 1.49823000 -2.77146700  
C 3.16380300 -0.55389000 -2.35415200  
O 5.97804100 3.00681700 -1.64786800  
C 7.31936300 4.77052700 -2.62499300  
C 4.90543500 5.48949500 -6.17573600  
H 2.92534800 5.50349300 -5.34637300  
C 7.29672900 5.28011200 -7.03485500  
O 0.74040800 2.14850700 -2.64103800  
N 2.01193100 0.27298300 -2.15793200  
O 3.12535100 -1.69014600 -1.80289600  
H 7.00486500 5.05170600 -3.63626800

H 6.85124800 5.43278000 -1.89729600  
H 8.40711800 4.86137000 -2.57846100  
C 4.79271000 6.85302300 -6.80353900  
H 8.13989200 4.58458500 -7.01993000  
H 7.04983500 5.48706300 -8.08407300  
H 7.63710700 6.23050500 -6.60497900  
H 1.20844000 -0.15687800 -1.70669700  
H 5.54229400 7.55316100 -6.41042600  
H 4.94168200 6.82289400 -7.89118800  
H 3.80643300 7.28746800 -6.61748100  
H 6.12413600 -0.20625100 -4.36826700  
H 2.01528300 3.69353000 -4.01692500

**(2.A.m)-[KSO<sub>4</sub>\_KHOSO<sub>3</sub>]<sub>1</sub>min, singl, (S)-3**

S 0.79040800 -0.14383300 -5.48741200  
O 1.28892800 -0.68484800 -6.79388200  
O 1.74241700 -0.52184400 -4.35831100  
O 0.64354400 1.36142300 -5.54249800  
S -1.50377000 -0.39589900 -0.49535300  
O -1.17770400 1.15474400 -0.13195700  
O -2.57707500 -0.76816400 0.43629900  
O -1.88697900 -0.41244500 -1.93922800  
K 0.10921800 -2.17637600 -2.96121100  
K -1.42627900 1.53213700 -3.82115200  
O -0.21629400 -1.14104100 -0.28370800  
O -0.57574600 -0.74117900 -5.14290600  
C 6.10849800 0.52438500 -4.17531400  
N 4.88045700 1.32669500 -4.05202900  
H 6.52069700 0.66127900 -5.17164300  
C 7.11811800 0.88631100 -3.09132700  
C 4.72770800 2.52844200 -4.73341600  
C 3.93683200 0.90096300 -3.15360100  
H 6.69417800 0.71033400 -2.10320800  
H 8.02236900 0.29057000 -3.22418700  
O 7.52932200 2.26406000 -3.20694100  
C 3.56149700 3.30091500 -4.47565700  
C 5.67746800 3.02787000 -5.63985900  
C 2.77428400 1.75137000 -2.99256800  
N 4.15001600 -0.21796400 -2.49432000  
C 6.86062900 3.17809100 -2.46164800  
C 3.38807500 4.53577100 -5.13619600  
N 2.60379800 2.89132900 -3.59550200  
C 5.48892700 4.24598300 -6.28232900  
H 6.59304300 2.48743500 -5.83202000  
C 1.73900700 1.27813500 -2.05164300  
C 3.17619500 -0.68287100 -1.65877100  
O 5.96679300 2.89503200 -1.68853100  
C 7.34886100 4.56918300 -2.75858500  
C 4.31909800 5.02229900 -6.03177800  
H 2.48565100 5.09396000 -4.90895300  
C 6.53466500 4.74849700 -7.23977400  
O 0.66408700 1.88306200 -1.87525700  
N 2.05571200 0.14199500 -1.38466500  
O 3.21297800 -1.78690800 -1.11770600  
H 6.90950300 4.89378800 -3.70760000  
H 7.02923600 5.24707400 -1.96789500  
H 8.43457900 4.58821800 -2.86846500  
C 4.11227500 6.34341700 -6.72312000

H 7.36891000 4.04935900 -7.32088000  
H 6.11196200 4.89777400 -8.23960400  
H 6.92868800 5.71845800 -6.91654700  
H 1.32102100 -0.28540600 -0.80221800  
H 4.92261100 7.04425900 -6.49335400  
H 4.09481800 6.22467700 -7.81221500  
H 3.16969900 6.80082200 -6.41562500  
H 5.82662500 -0.52059000 -4.05362400  
H -0.44400100 1.46107300 -0.74285900

**[K<sub>2</sub>SO<sub>4</sub>]**

S 0.91129800 1.02441100 -2.92941400  
O 2.25782500 0.32963700 -2.85716800  
O 0.20460500 0.92835000 -1.59049700  
O 1.10117800 2.49117200 -3.26718700  
K 1.86317900 -1.46929600 -4.77790800  
K -0.05154700 3.53475000 -1.10768500  
O 0.08008900 0.34887800 -4.00380400

**CuBF<sub>4</sub>**

Cu 0.33323200 1.23640300 -4.27284500  
B -1.35375900 1.16291400 -2.18718400  
F -2.62346200 1.68166900 -2.23302700  
F -0.38601600 2.18894700 -2.53212700  
F -1.03069200 0.60025400 -0.97807100  
F -1.17735400 0.18924300 -3.25036900

**(LH)- CuBF<sub>4</sub>**

N -1.41176200 1.43913400 0.39947200  
C -0.50534400 1.81399000 -0.71681700  
C -0.57992900 3.31496900 -1.01029000  
C -2.03966300 3.78014000 -0.98710400  
C -2.64707200 3.58381800 0.42213700  
C -1.83802000 2.56732400 1.23974800  
H 0.51308000 1.49291700 -0.46914100  
H 0.01276400 3.88646000 -0.28763600  
H -2.11796800 4.82580700 -1.29672200  
H -2.65225800 4.52511900 0.98073900  
H -2.39912900 2.21365000 2.09468300  
H -3.68620100 3.24983900 0.34407400  
H -0.92770100 3.03142100 1.63206900  
H -2.60415400 3.19051500 -1.71872200  
H -0.12695000 3.48678500 -1.99097700  
H -0.82101900 1.24593700 -1.59330700  
C -1.69042900 0.14211200 0.55427500  
O -1.15946500 -0.66050200 -0.28104500  
Cu 0.02979300 -2.04849700 0.17018000  
B 1.30860700 -3.68091000 2.05056500  
F 0.87390800 -4.96455200 2.28240300  
F 2.58812100 -3.44624600 2.49508100  
F 1.29456600 -3.46012300 0.57830400  
F 0.39957900 -2.72572800 2.55393400  
C -2.64107000 -0.40472800 1.64280700  
C -2.01758600 -0.22111000 3.04655000  
H -1.85359000 0.82084100 3.32401600  
H -2.68935800 -0.66066500 3.79000200  
H -1.06085500 -0.74733700 3.10417100  
C -2.83623300 -1.91964400 1.42653400

H -3.58309700 -2.27811800 2.14036200  
H -3.18652200 -2.14390600 0.41688600  
H -1.91512100 -2.47805800 1.61474400  
C -4.03931300 0.24735000 1.52899600  
H -4.05231100 1.31624100 1.73785900  
H -4.45159900 0.09508700 0.52695800  
H -4.71057800 -0.23327700 2.24605700

**(Na<sub>2</sub>S<sub>2</sub>O<sub>4</sub>)- CuBF<sub>4</sub>**

Cu 0.71627900 2.20603500 -3.60792300  
B 0.82203700 2.78723200 -6.35935300  
F 0.79545400 3.94031700 -7.08833100  
F 0.41124300 1.66666200 -7.09514400  
F 2.04745800 2.55581900 -5.72873900  
F -0.16416800 2.90130100 -5.24738900  
S 0.83999900 -0.08619900 -1.81495400  
O -0.14270900 -0.06186600 -3.22685000  
O 1.43255900 1.29239400 -2.05668100  
O -0.07307000 -0.15309200 -0.67494200  
O 1.81720300 -1.16643200 -1.95942200  
O -1.09876100 -1.16593200 -3.19083900  
Na -1.54781300 0.94527600 -6.06771200  
S -0.85423400 -2.14692000 -4.58948800  
O -2.04013400 -2.99853100 -4.42555600  
O -0.90489300 -1.19002900 -5.72427500  
O 0.45355900 -2.79982000 -4.42315800  
Na 2.74651300 -0.67144500 -5.31849900

**[(LH)-(NaSO<sub>4</sub>)]-[NaSO<sub>4</sub>-CuBF<sub>4</sub>], trip**

Cu 1.56805400 1.88684300 -4.03361100  
B -0.75175900 1.62220900 -2.44245600  
F -1.91794500 2.32075600 -2.15707800  
F 0.39502300 2.46610000 -2.32523300  
F -0.61397000 0.47797500 -1.67975700  
F -0.79171800 1.24241800 -3.83587600  
S 2.67922500 -0.45099900 -4.39463900  
O 2.60066300 0.78768600 -5.34662500  
O 4.06609100 -0.84438700 -4.11993100  
O 1.99672600 0.21933700 -3.14027400  
O 1.79194400 -1.54653800 -4.86135200  
O -2.21904000 -1.27760900 -4.52571700  
Na -3.15007800 1.70963400 -4.11608600  
S -2.45850100 -0.87705500 -5.93427400  
O -3.30818500 -1.90510700 -6.68517000  
O -3.02156500 0.49309600 -6.04755000  
O -1.21420100 -1.05393800 -6.80598600  
Na -0.14655900 -1.17649800 -3.48283200  
O 1.21940600 3.51453000 -4.95948100  
C 0.12066200 4.01058000 -5.38317600  
C -0.31743700 5.34929200 -4.74653600  
C 0.73828500 5.74542400 -3.69372500  
H 0.81977400 4.98595500 -2.91418600  
H 1.72307000 5.88470100 -4.14456600  
H 0.43193300 6.68793200 -3.23149700  
C -1.66210700 5.19349900 -3.99635600  
H -2.50479400 4.93146500 -4.63684400  
H -1.58152400 4.43055500 -3.21948800  
H -1.90056900 6.14513500 -3.51234500

C -0.36854700 6.47464300 -5.80502400  
H -0.54251300 7.42642000 -5.29512300  
H 0.58530800 6.54688600 -6.33616400  
H -1.15887500 6.35152000 -6.54542900  
N -0.55947500 3.39189700 -6.34778900  
C -0.05074600 2.14975700 -6.97079900  
C -1.81445300 3.83821800 -6.98352200  
C 0.21828800 2.37389000 -8.46154700  
H -0.81756100 1.38548500 -6.83134200  
H 0.85410000 1.82758700 -6.46884800  
C -1.59069500 4.11947000 -8.47233200  
H -2.53467900 3.02206800 -6.86490300  
C -1.03374000 2.88184300 -9.18290200  
H 0.56148700 1.42759600 -8.89216900  
H 1.03553700 3.09747800 -8.56975300  
H -2.54471500 4.42889400 -8.91106300  
H -0.89393500 4.95984300 -8.57594200  
H -0.80871200 3.11023500 -10.22936400  
H -1.79650600 2.09215900 -9.18225700  
H -2.21039600 4.70704100 -6.47606800

**[(LH)-(NaSO<sub>4</sub>)]-[NaSO<sub>4</sub>-CuBF<sub>4</sub>], sing**

Cu -0.59056000 2.04520600 -2.02829500  
B 2.49659100 2.45591300 -2.46560600  
F 3.19257000 3.56783500 -2.03045400  
F 3.29934100 1.64069500 -3.29872200  
F 1.98159900 1.71365400 -1.39674300  
F 1.38265800 2.87121400 -3.29136700  
S -1.16277100 -0.27047300 -3.89583200  
O 0.26280500 0.20171400 -4.72337800  
O -0.71358200 0.18793500 -2.52872900  
O -2.24121400 0.52806500 -4.48343100  
O -1.25688000 -1.72456000 -3.99792000  
O 0.15846500 -0.27881800 -6.10025800  
Na 1.98782500 1.90235600 -5.26115100  
S 1.63039700 -1.12209600 -6.44312300  
O 1.35310300 -1.42464700 -7.85309400  
O 2.66941700 -0.08788400 -6.19799900  
O 1.68903400 -2.26532500 -5.51899800  
Na 2.26297400 -1.52110700 -2.39852500  
O -0.80878800 3.79419200 -1.30232100  
C -0.13342000 4.82912500 -1.59829500  
C -0.55093400 5.64043900 -2.85032700  
C -1.61539700 4.82516600 -3.61274500  
H -1.19958000 3.88651600 -3.99134000  
H -2.47373900 4.58978000 -2.98150500  
H -1.96096500 5.41182600 -4.46856000  
C 0.61376600 5.89289200 -3.83799700  
H 0.19153200 6.23860700 -4.78625900  
H 1.32024100 6.65497500 -3.50992100  
H 1.16459700 4.96983000 -4.01957800  
C -1.20586300 6.96701300 -2.39832500  
H -2.05916500 6.77241600 -1.74145100  
H -0.51670900 7.62778800 -1.86926400  
H -1.57140100 7.50360900 -3.27893200  
N 0.85866500 5.19800000 -0.78044700  
C 1.22131600 4.35155700 0.37447600  
C 1.68669000 6.40891500 -0.85848900

C 1.03629700 5.12234700 1.68206500  
H 2.26897700 4.06727700 0.23514400  
H 0.61559600 3.45190900 0.34482800  
C 1.54350800 7.24017500 0.42172100  
H 2.72314700 6.08030900 -0.99717400  
H 1.41015300 7.00132600 -1.71988100  
C 1.86283400 6.41315900 1.67132600  
H 1.32990300 4.47728500 2.51692600  
H -0.02770400 5.35769800 1.80998400  
H 2.20568100 8.10892600 0.34661700  
H 0.51509500 7.61816400 0.47883700  
H 1.67460300 7.00102200 2.57550100  
H 2.93057000 6.15648600 1.67191400

**TS(H-transf), trip**

Cu 1.41768100 1.62681600 -3.93997500  
B -0.62969000 1.65544800 -1.58385200  
F -1.75075400 2.44930000 -1.87655300  
F 0.52357700 2.27373800 -2.23400600  
F -0.38905900 1.54198100 -0.24595000  
F -0.82571000 0.39466900 -2.20038700  
S 2.65621500 -0.61332700 -4.49368800  
O 2.44087000 0.68484100 -5.34734100  
O 4.08000200 -0.90047500 -4.28614900  
O 1.96036100 -0.08365800 -3.17756200  
O 1.84751400 -1.74136600 -5.01671600  
O -1.70512100 -0.61117800 -4.82234700  
Na -2.79071100 1.14116700 -3.52355300  
S -2.42467100 -0.24937400 -6.09060400  
O -3.16820500 -1.38426300 -6.68727200  
O -3.23977400 0.98036900 -5.85320700  
O -1.34473400 0.07252000 -7.21295900  
Na -0.07614100 -1.49513400 -3.48314300  
O 0.96135800 3.29269600 -4.84532100  
C 0.01674700 3.90562100 -5.40594300  
C -0.42197300 5.25288800 -4.78061900  
C 0.57332000 5.59052100 -3.64706600  
H 0.57956000 4.81694300 -2.87776600  
H 1.59134000 5.70663700 -4.02822800  
H 0.26892700 6.53597800 -3.18939800  
C -1.82492200 5.11474700 -4.13016000  
H -2.62720600 4.90695100 -4.83984100  
H -1.81923800 4.32324000 -3.37622900  
H -2.06503100 6.05822400 -3.63031800  
C -0.36327400 6.41189700 -5.80670700  
H -0.56138800 7.34929200 -5.27881100  
H 0.63326100 6.48420200 -6.25308800  
H -1.09042700 6.33788700 -6.61543900  
N -0.51713600 3.39943300 -6.55885800  
C 0.08674400 2.25728100 -7.18191200  
C -1.77624400 3.85092500 -7.20973600  
C 0.23780500 2.36806400 -8.70109300  
H -0.63796300 1.29682800 -7.03360300  
H 1.00994100 1.97715300 -6.68261100  
C -1.57965200 4.09602600 -8.70805500  
H -2.50552100 3.05045200 -7.04363300  
C -1.03972600 2.83987700 -9.39785200  
H 0.56527800 1.39520500 -9.07912000

H 1.05702000 3.07750900 -8.88913300  
H -2.54603700 4.39051900 -9.12977000  
H -0.89122100 4.93719300 -8.85433000  
H -0.83959900 3.03577900 -10.45590100  
H -1.79237400 2.04359100 -9.35314100  
H -2.14394500 4.74028600 -6.71604100

**[L-OSO<sub>3</sub>Na]-[NaHSO<sub>4</sub>-CuBF<sub>4</sub>], singlet**

Cu 1.45386500 1.78398500 -4.29552300  
B -1.29284700 1.80989600 -2.13612300  
F -2.66943000 2.06298500 -2.25657600  
F -0.61543700 2.83687000 -1.52273700  
F -1.07480700 0.57268000 -1.50094900  
F -0.81018500 1.66077700 -3.49883200  
S 2.80591500 -0.77457000 -3.74333100  
O 3.69988400 -0.17265000 -4.74486300  
O 3.39994200 -1.61579500 -2.70458300  
O 1.86032100 0.27597500 -3.13895400  
O 1.77196300 -1.76781500 -4.53281200  
O -1.51046300 -0.65265800 -5.17912400  
Na -2.81848800 1.34117800 -4.58762500  
S -0.84103000 -0.26040700 -6.45171200  
O -1.33036900 -0.94753400 -7.65092800  
O -1.32601000 1.32440300 -6.55277400  
O 0.65044300 -0.19952100 -6.34230700  
Na -0.29391700 -0.84829400 -3.14304100  
O 1.12250700 3.23541300 -5.49117600  
C 0.08520800 3.92142000 -5.68820800  
C -0.14580500 5.16774800 -4.80790500  
C 0.91657700 5.16310400 -3.68885100  
H 0.77927000 4.30931400 -3.02093100  
H 1.92964400 5.13733500 -4.09332000  
H 0.80091100 6.07598400 -3.09795800  
C -1.52682100 5.15046600 -4.11092900  
H -2.37330600 5.27857100 -4.78292400  
H -1.66452900 4.22289000 -3.55301000  
H -1.55462000 5.97591900 -3.39377600  
C 0.06579000 6.44726000 -5.65274900  
H -0.03729000 7.31932600 -5.00094500  
H 1.07287000 6.45948300 -6.07994900  
H -0.64665800 6.55968400 -6.47143800  
N -0.74427600 3.55770300 -6.70294700  
C -0.49437000 2.26194400 -7.31909800  
C -2.01643300 4.22374200 -7.06394700  
C -0.82455200 2.20439100 -8.80158000  
H 0.54155400 1.99643800 -7.14059400  
C -2.25646100 4.21719400 -8.57197400  
H -2.84151500 3.71171800 -6.55820800  
C -2.19357000 2.79582600 -9.12742700  
H -0.74363300 1.16148800 -9.11760200  
H -0.04193000 2.76682700 -9.32428400  
H -3.23335600 4.67515400 -8.75429800  
H -1.50242400 4.84456900 -9.06225100  
H -2.35735600 2.79046100 -10.20861500  
H -2.98265500 2.18280100 -8.67526700  
H -1.99059700 5.24402800 -6.70508600  
H 1.39588200 -1.26221800 -5.31031400

**[(LOH)-CuBF<sub>4</sub>]-[NaHSO<sub>4</sub>]<sub>2</sub>, singlet**

Cu 0.91141300 1.31715900 -4.50014300  
B -1.91163000 1.58561100 -1.92620300  
F -3.23166900 1.87584400 -2.31381200  
F -1.30905000 2.65150100 -1.29888500  
F -1.86744900 0.41889400 -1.14289600  
F -1.19578300 1.27914100 -3.15425100  
S 2.48810100 -1.08332800 -3.96937300  
O 2.88266000 -0.52383900 -5.27807200  
O 3.57555200 -1.46579800 -3.06335500  
O 1.46200000 -0.16404100 -3.29234500  
O 1.66871900 -2.45792700 -4.23043100  
O -2.83768400 -0.51795200 -5.21549400  
Na -2.98265500 1.67419200 -4.64634600  
S -1.57326000 -1.15090400 -5.67023100  
O -1.68472700 -1.92898600 -6.90939300  
O -0.52686500 0.07647700 -5.96271400  
O -0.87864600 -1.87499600 -4.55232700  
Na -0.56111200 -0.95157400 -2.45262100  
O 0.88683200 2.90953200 -5.60133900  
C 0.00630000 3.79815200 -5.74244000  
C -0.07419200 4.93991600 -4.70474800  
C 1.09327700 4.76518900 -3.71283600  
H 1.02150600 3.81726600 -3.17423000  
H 2.06070100 4.80130800 -4.21870100  
H 1.05302000 5.57627100 -2.98038800  
C -1.37865700 4.89981000 -3.87448300  
H -2.29257500 4.88317400 -4.46907800  
H -1.38029100 4.02909700 -3.21842400  
H -1.41331300 5.79076700 -3.24015800  
C 0.11629800 6.30242100 -5.41339200  
H 0.21101800 7.08185200 -4.65220000  
H 1.03209500 6.30170800 -6.01206200  
H -0.71182500 6.58108400 -6.06518900  
N -0.75703600 3.77797300 -6.86442700  
C -0.44663200 2.78966100 -7.89519800  
C -1.99585000 4.54504100 -7.10779400  
C -0.45250900 3.41596700 -9.28724200  
H 0.53404300 2.37955700 -7.66617400  
C -1.97337200 5.22548000 -8.47520300  
H -2.82907600 3.83533300 -7.05545800  
C -1.73483200 4.19713600 -9.58290200  
H -0.27786700 2.62395000 -10.02390500  
H 0.41331700 4.08586000 -9.33560400  
H -2.92622000 5.74407800 -8.61857000  
H -1.18020700 5.98282600 -8.48886400  
H -1.65540100 4.68516100 -10.55835500  
H -2.58869900 3.51118700 -9.63620800  
H -2.13533000 5.27074700 -6.31842100  
H 0.73755300 -2.24128600 -4.52365500  
O -1.43184200 1.73677200 -7.77267300  
H -1.54626400 1.30500000 -8.63227400  
H -0.89398900 0.65898600 -6.69775000

**[(LNHCO)-CuBF<sub>4</sub>]-[NaHSO<sub>4</sub>]<sub>2</sub>, singlet**

Cu 0.79563400 1.46916000 -4.51065500  
B -1.49587000 0.48813000 -1.23160300  
F -2.83600800 0.86651900 -1.44588000

F -0.95606200 1.11834900 -0.13534100  
F -1.39189100 -0.91540300 -1.13496600  
F -0.77057300 0.86416700 -2.42638300  
S 2.17451500 -0.90822500 -5.54809000  
O 1.96137000 0.02830900 -6.67264700  
O 3.52912900 -1.44418700 -5.39204400  
O 1.63231900 -0.30227300 -4.24706100  
O 1.24151100 -2.20926900 -5.79111300  
O -3.25998600 -0.33528300 -4.58269700  
Na -2.68938800 1.80843000 -3.56497000  
S -2.00621000 -0.47369200 -5.35390300  
O -2.35952900 -0.82663800 -6.86852500  
O -1.24303600 0.81797500 -5.38664000  
O -1.17057200 -1.62576600 -4.87832500  
Na 0.07139700 -1.38515500 -2.85899600  
O 0.46425000 3.36546600 -4.44368300  
C -0.26561300 4.13849800 -5.12314200  
C -0.39361900 5.59370400 -4.64124500  
C 0.61864700 5.82266500 -3.50373800  
H 0.45369200 5.13016600 -2.67653500  
H 1.64577100 5.69439000 -3.85553400  
H 0.50691200 6.84493500 -3.13153500  
C -1.82073000 5.76873400 -4.06808700  
H -2.59928300 5.64455700 -4.82356700  
H -2.00406000 5.04430400 -3.26793400  
H -1.91846200 6.77356200 -3.64694200  
C -0.10871300 6.63301500 -5.74527400  
H -0.07092800 7.62481000 -5.28576700  
H 0.85986600 6.44852200 -6.21967100  
H -0.87279300 6.66632100 -6.52073800  
N -0.95944300 3.64030100 -6.15891400  
C -0.47267700 1.29522500 -8.35299600  
C -1.77868300 4.29132500 -7.18555400  
C 0.22358600 2.46237700 -8.96932800  
H 0.17157900 0.51462300 -7.92036400  
C -0.99504800 4.70012000 -8.44620700  
H -2.56702900 3.58083800 -7.44620300  
C -0.68388800 3.59462400 -9.46581500  
H 0.81672600 2.03341300 -9.79171900  
H 0.97767900 2.80714900 -8.24770500  
H -1.58845300 5.46664900 -8.95779600  
H -0.06209300 5.18421800 -8.13947100  
H -0.19814100 4.06907500 -10.32362100  
H -1.61837600 3.16087200 -9.83689400  
H -2.26901800 5.16312100 -6.75733300  
H 0.29175100 -1.97320000 -5.58864100  
O -1.69909400 1.18650300 -8.30654500  
H -0.93673900 2.62528800 -6.19581600  
H -2.15504900 -0.02105100 -7.46561300

**LNHCO**

O -0.40862400 6.47387600 -6.50172600  
C -0.90856100 5.35570700 -6.33939000  
C -0.98632900 4.72595700 -4.93380300  
C 0.46656900 4.44847300 -4.49276300  
H 0.92915800 3.69318300 -5.13446900  
H 1.06016400 5.36510000 -4.54130300  
H 0.47877400 4.07970900 -3.46171200

C -1.80216400 3.42461300 -4.87420800  
H -2.83665000 3.57900000 -5.20119400  
H -1.34808100 2.63033400 -5.47334900  
H -1.83984900 3.06938500 -3.83972400  
C -1.62164800 5.77372000 -4.00039800  
H -1.61202100 5.40856700 -2.96862500  
H -1.06840700 6.71384100 -4.04658400  
H -2.66172200 5.97266400 -4.28080500  
N -1.37668600 4.63191600 -7.39144000  
C 0.38910300 2.40153100 -7.96593000  
C -1.47045200 5.20857000 -8.73369200  
C 1.29959100 3.37545300 -8.66792300  
O 0.57604100 1.96641700 -6.84392900

**[(NaHSO<sub>4</sub>)<sub>2</sub>-CuBF<sub>4</sub>]**

Cu 2.27429600 0.98275300 -3.78130100  
B 0.98186700 1.82372100 -1.39640100  
F 1.13831200 2.43666600 -0.18972900  
F 2.13449500 2.14780800 -2.25080700  
F 0.96644500 0.41883600 -1.28543800  
F -0.16069200 2.26000000 -2.08159100  
S 0.81917100 -0.74203300 -5.69786900  
O -0.16441300 0.58448900 -5.68391300  
O 0.84536100 -1.27398300 -7.05413300  
O 2.17108400 -0.22391100 -5.25642600  
O 0.18435700 -1.59178800 -4.65996200  
O -1.96076800 -0.61545400 -2.47650100  
Na -1.47862200 1.41674300 -3.72671600  
S -3.01970200 -1.06402300 -3.44768000  
O -4.24048700 -1.58207100 -2.82101800  
O -3.21803000 -0.01417700 -4.48651600  
O -2.39371000 -2.36723400 -4.21164900  
Na 0.14459200 -1.43931300 -2.28681700  
H -1.50937400 -2.11396100 -4.56936600  
H 0.09422000 1.18832400 -6.40265200

C -0.12473100 5.41544400 -9.43765500  
H -2.10660100 4.54239100 -9.32316500  
C 0.65453400 4.15186800 -9.82673400  
H 2.11532400 2.75339400 -9.06713100  
H 1.75416000 4.03779700 -7.92372100  
H -0.33679300 5.98068000 -10.35336600  
H 0.49875800 6.05815300 -8.80935900  
H 1.45179200 4.45201100 -10.51427900  
H 0.00546700 3.47407900 -10.39878700  
H -1.97789700 6.17745200 -8.66203100  
H -0.46732400 2.03355100 -8.57244500  
H -1.90879800 3.79838100 -7.19822700

**Table S20.** Cartesian coordinates of the optimized geometries for the autocyclization process. The cartesian coordinates of optimized geometries are given below in the standard XYZ format, and units are in Å.

|                                                 |           |           |           |               |           |           |           |
|-------------------------------------------------|-----------|-----------|-----------|---------------|-----------|-----------|-----------|
| =====                                           |           |           |           | H             | 1.175808  | -0.882576 | 2.158696  |
| Cu <sup>I</sup> (H <sub>2</sub> O) <sub>2</sub> |           |           |           | O             | -3.174503 | -0.569526 | 0.922679  |
| =====                                           |           |           |           | Cu            | -1.455840 | -0.366317 | -0.046435 |
| Cu                                              | -0.000001 | -0.015904 | -0.000001 | O             | -1.520679 | -2.324635 | -0.822258 |
| O                                               | -1.916053 | -0.041990 | 0.045146  | H             | -1.869974 | -3.162916 | -0.487339 |
| H                                               | -2.466433 | -0.497143 | -0.607432 | H             | -0.963454 | -2.535235 | -1.585888 |
| H                                               | -2.459021 | 0.619412  | 0.496257  | H             | 2.446529  | 1.920672  | 0.280592  |
| O                                               | 1.916053  | -0.041999 | -0.045135 | H             | -3.227755 | -0.781899 | 1.868409  |
| H                                               | 2.459003  | 0.619319  | -0.496388 | =====         |           |           |           |
| H                                               | 2.466446  | -0.497008 | 0.607532  | <b>11-TS'</b> |           |           |           |
| =====                                           |           |           |           | =====         |           |           |           |
| H <sub>2</sub> O                                |           |           |           | C             | 2.211283  | -0.831218 | 0.428157  |
| =====                                           |           |           |           | C             | 2.350518  | 0.487886  | 0.004497  |
| O                                               | 0.000000  | 0.000000  | 0.119237  | H             | 0.483978  | 3.976199  | 0.408292  |
| H                                               | 0.000000  | 0.759322  | -0.476819 | N             | 0.165381  | -2.077492 | -0.115260 |
| H                                               | 0.000000  | -0.759322 | -0.476819 | C             | 1.557296  | -1.877891 | -0.486647 |
| =====                                           |           |           |           | C             | -3.071010 | -1.284074 | -1.187728 |
| H <sub>3</sub> O <sup>+</sup>                   |           |           |           | C             | -2.226441 | -1.464650 | 0.096619  |
| =====                                           |           |           |           | C             | -0.785180 | -1.150368 | -0.276482 |
| O                                               | -0.000003 | 0.000000  | -0.070534 | C             | -2.401565 | -2.891425 | 0.642945  |
| H                                               | -0.479665 | -0.817077 | 0.187333  | C             | -2.666525 | -0.438515 | 1.165127  |
| H                                               | -0.467790 | 0.823925  | 0.187333  | O             | -0.468801 | -0.034211 | -0.788835 |
| H                                               | 0.947428  | -0.006848 | 0.187344  | H             | 2.049384  | -0.987997 | 1.498865  |
| =====                                           |           |           |           | H             | 3.479207  | -1.116543 | 0.335396  |
| CO                                              |           |           |           | H             | 2.433203  | 0.707005  | -1.059764 |
| =====                                           |           |           |           | H             | 2.655517  | 1.269926  | 0.697336  |
| C                                               | 0.000000  | 0.000000  | -0.650254 | H             | 1.618033  | -1.552656 | -1.529320 |
| O                                               | 0.000000  | 0.000000  | 0.487690  | H             | 2.065544  | -2.838362 | -0.395598 |
| =====                                           |           |           |           | H             | -2.785254 | -2.006155 | -1.957733 |
| <b>11</b>                                       |           |           |           | H             | -4.124074 | -1.447259 | -0.946401 |
| =====                                           |           |           |           | H             | -2.958704 | -0.278007 | -1.596854 |
| C                                               | -0.643701 | 2.688618  | 0.315671  | H             | -3.455133 | -3.056338 | 0.878352  |
| C                                               | -1.731084 | 1.806837  | -0.110986 | H             | -2.125222 | -3.653774 | -0.093724 |
| H                                               | -3.916441 | -1.014316 | 0.481151  | H             | -1.843383 | -3.056633 | 1.571780  |
| N                                               | 1.556332  | 1.664027  | -0.133181 | H             | -3.706482 | -0.629786 | 1.439742  |
| C                                               | 0.638462  | 2.718980  | -0.543607 | H             | -2.600419 | 0.580318  | 0.777023  |
| C                                               | 2.561999  | -1.604793 | -0.978134 | H             | -2.061853 | -0.518516 | 2.075225  |
| C                                               | 2.227635  | -0.696826 | 0.230147  | O             | 1.139631  | 3.334334  | 0.084389  |
| C                                               | 1.274533  | 0.377327  | -0.255007 | Cu            | 0.156281  | 1.637844  | -0.196014 |
| C                                               | 3.518959  | -0.104202 | 0.818534  | O             | -1.527462 | 2.971804  | 0.507495  |
| C                                               | 1.477039  | -1.511548 | 1.313316  | H             | -1.963245 | 2.872683  | 1.367039  |
| O                                               | 0.167627  | 0.062695  | -0.839786 | H             | -2.230851 | 3.214381  | -0.113828 |
| H                                               | -0.429938 | 2.611425  | 1.387534  | H             | -0.110200 | -2.974256 | 0.264988  |
| H                                               | -1.126373 | 3.687038  | 0.198105  | H             | 1.662124  | 3.778281  | -0.600528 |
| H                                               | -1.942717 | 1.729989  | -1.179628 | O             | 4.663016  | -1.846890 | 0.280270  |
| H                                               | -2.576872 | 1.676123  | 0.562794  | H             | 5.124345  | -2.002471 | 1.120927  |
| H                                               | 0.391375  | 2.599735  | -1.602309 | H             | 5.329462  | -1.607226 | -0.384639 |
| H                                               | 1.151854  | 3.671224  | -0.413376 | =====         |           |           |           |
| H                                               | 3.092530  | -1.053594 | -1.759043 | <b>12</b>     |           |           |           |
| H                                               | 3.207509  | -2.418326 | -0.639712 | =====         |           |           |           |
| H                                               | 1.659031  | -2.039289 | -1.412205 | C             | -1.281993 | 1.785136  | 0.681301  |
| H                                               | 4.172877  | -0.919528 | 1.134983  | C             | -2.608470 | 1.753735  | 0.328333  |
| H                                               | 4.081257  | 0.476324  | 0.079128  | H             | -2.697062 | -2.320667 | -0.704102 |
| H                                               | 3.330995  | 0.510282  | 1.706290  | N             | 1.091111  | 1.602308  | -0.057207 |
| H                                               | 2.143154  | -2.284849 | 1.703191  | C             | -0.192546 | 2.283750  | -0.248026 |
| H                                               | 0.599575  | -2.016477 | 0.897537  | C             | 3.049685  | -0.989119 | -1.370055 |
|                                                 |           |           |           | C             | 2.708777  | -0.278654 | -0.038647 |
|                                                 |           |           |           | C             | 1.282794  | 0.277317  | -0.175507 |
|                                                 |           |           |           | C             | 3.758999  | 0.807004  | 0.260289  |



|    |           |           |           |
|----|-----------|-----------|-----------|
| C  | 2.684429  | -1.308049 | 1.117832  |
| O  | 0.333945  | -0.515367 | -0.400809 |
| H  | -0.998648 | 1.666544  | 1.725898  |
| H  | -2.942685 | 2.053520  | -0.659692 |
| H  | -3.376164 | 1.600921  | 1.077290  |
| H  | -0.515543 | 2.198858  | -1.294582 |
| H  | -0.009041 | 3.340843  | -0.044024 |
| H  | 3.085139  | -0.274344 | -2.207931 |
| H  | 4.031290  | -1.459453 | -1.291861 |
| H  | 2.303496  | -1.759739 | -1.601166 |
| H  | 4.745522  | 0.341879  | 0.350133  |
| H  | 3.833256  | 1.545950  | -0.548629 |
| H  | 3.567821  | 1.329513  | 1.209077  |
| H  | 3.679515  | -1.745482 | 1.237775  |
| H  | 1.990796  | -2.130379 | 0.897641  |
| H  | 2.403710  | -0.845626 | 2.071282  |
| O  | -2.874882 | -1.455946 | -1.118237 |
| Cu | -1.697373 | -0.151969 | -0.025519 |
| O  | -1.354717 | -2.087545 | 1.090559  |
| H  | -1.476459 | -2.278975 | 2.029229  |
| H  | -0.401951 | -2.121285 | 0.913105  |
| H  | 1.902608  | 2.177832  | 0.095796  |
| H  | -2.766378 | -1.572837 | -2.073976 |

|   |           |           |           |
|---|-----------|-----------|-----------|
| C | 1.910454  | -0.721244 | 1.343505  |
| O | -0.550683 | -1.130651 | -0.070758 |
| H | -2.553213 | -0.087610 | 1.505671  |
| H | -3.773768 | -0.109228 | 0.229696  |
| H | -2.195542 | -1.296473 | -1.303844 |
| H | -2.256336 | -2.190931 | 0.235797  |
| H | -2.459824 | 1.407246  | -1.180832 |
| H | -2.413313 | 2.104756  | 0.447351  |
| H | 1.817945  | -0.298938 | -2.131681 |
| H | 3.161715  | -0.847335 | -1.120476 |
| H | 1.675862  | -1.806979 | -1.201352 |
| H | 3.221071  | 1.351808  | 0.098354  |
| H | 1.915941  | 1.967583  | -0.899500 |
| H | 1.800939  | 2.015757  | 0.887990  |
| H | 2.998829  | -0.775047 | 1.419421  |
| H | 1.513509  | -1.737597 | 1.360130  |
| H | 1.536293  | -0.180712 | 2.217915  |
| H | -0.120983 | 2.009325  | -0.147260 |

=====

**olefin**

=====

|   |           |           |           |
|---|-----------|-----------|-----------|
| C | 2.946537  | 0.009109  | -0.502506 |
| C | 4.116289  | 0.584329  | -0.222507 |
| N | 0.707200  | 0.103518  | 0.479392  |
| C | 2.008584  | -0.550683 | 0.535695  |
| C | -2.789904 | -0.414465 | 0.861194  |
| C | -1.726189 | 0.271425  | -0.024536 |
| C | -0.429307 | -0.557392 | 0.097167  |
| C | -1.575630 | 1.744428  | 0.389585  |
| C | -2.160057 | 0.190793  | -1.509472 |
| O | -0.432459 | -1.763622 | -0.143479 |
| H | 2.607965  | -0.074213 | -1.538700 |
| H | 4.470387  | 0.682687  | 0.807213  |
| H | 4.768835  | 0.970782  | -1.002447 |
| H | 1.805193  | -1.616405 | 0.350055  |
| H | 2.441413  | -0.449790 | 1.540356  |
| H | -2.518134 | -0.342799 | 1.922135  |
| H | -3.761933 | 0.063827  | 0.724903  |
| H | -2.868396 | -1.471832 | 0.597862  |
| H | -2.543039 | 2.254677  | 0.297297  |
| H | -1.255499 | 1.842338  | 1.434312  |
| H | -0.866034 | 2.281561  | -0.249299 |
| H | -3.122197 | 0.687055  | -1.648305 |
| H | -2.252153 | -0.857133 | -1.815722 |
| H | -1.424548 | 0.674692  | -2.163712 |
| H | 0.679484  | 1.103636  | 0.602416  |

=====

**10m**

=====

|   |           |           |           |
|---|-----------|-----------|-----------|
| C | -2.699482 | -0.055645 | 0.421723  |
| C | -2.008492 | -1.238029 | -0.228435 |
| N | -0.655543 | 1.149285  | -0.138839 |
| C | -2.129494 | 1.237346  | -0.151444 |
| C | 2.072951  | -0.790560 | -1.188204 |
| C | 1.543031  | 0.006776  | 0.027662  |
| C | 0.032262  | 0.034120  | -0.067526 |
| C | 2.134264  | 1.425327  | 0.027381  |

## Vibrational Frequencies of the Optimized Geometries

**Table S21.** Vibrational Frequencies (in  $\text{cm}^{-1}$ ) of the Optimized Geometries for the autocyclization reaction.

```
=====  
Cu(H2O)2  
=====  
114.12 114.21 132.46 183.89 185.02 378.55  
509.56 618.25 619.05 1648.19 1649.56 3799.01  
3802.21 3894.29 3894.30  
  
=====  
H2O  
=====  
1665.28 3799.59 3912.80  
  
=====  
H3O+  
=====  
783.27 1668.62 1668.78 3583.76 3702.64 3702.85  
  
=====  
CO  
=====  
2208.63  
  
11  
=====  
18.13 29.01 55.98  
65.38 71.43 101.43 116.88 147.15 163.26  
174.39 202.14 209.89 226.45 256.30 259.21  
264.10 295.26 303.91 317.65 324.01 329.69  
352.86 367.67 377.43 388.66 402.64 437.66  
476.54 522.46 535.21 579.93 630.16 686.56  
717.96 745.76 790.16 793.10 853.82 907.26  
940.62 951.46 975.18 978.01 999.07 1041.18  
1047.37 1068.37 1112.31 1157.49 1203.71 1222.35  
1236.56 1248.52 1297.61 1333.98 1380.28 1383.68  
1409.76 1411.19 1414.43 1451.52 1480.15 1490.11  
1493.11 1493.66 1498.51 1515.59 1523.78 1532.91  
1542.64 1614.65 1647.59 1652.46 2897.29 3044.02  
3047.55 3069.33 3090.21 3101.65 3113.24 3116.47  
3118.06 3144.47 3148.34 3148.97 3156.41 3173.35  
3228.90 3589.29 3752.80 3785.31 3844.54 3882.39  
  
=====  
11-TS'  
=====  
-385.93 19.72 26.83  
48.44 58.52 66.12 75.67 86.56 100.66  
116.18 117.63 124.22 155.24 183.79 207.77  
219.26 241.19 250.99 276.97 286.93 298.89  
317.04 325.03 329.88 336.14 373.59 382.70  
398.99 417.99 426.88 438.53 444.48 456.86  
508.94 535.22 557.06 585.71 647.52 651.80  
689.97 726.93 784.28 794.71 867.42 909.04  
944.17 948.76 954.09 978.67 1000.67 1028.99  
1047.90 1056.79 1069.55 1124.49 1150.66 1228.43  
1241.22 1258.20 1284.30 1301.74 1333.50 1391.03  
1394.63 1410.16 1414.96 1444.13 1450.81 1487.41  
1493.01 1500.36 1502.15 1515.77 1525.31 1537.83  
1573.46 1593.19 1611.88 1640.01 1651.03 1657.67  
3042.81 3054.25 3067.40 3089.78 3112.47 3115.47  
3131.14 3134.33 3143.47 3146.19 3151.94 3157.25  
3159.92 3241.20 3616.55 3735.20 3738.19 3775.42  
3846.29 3847.08 3869.92  
  
=====  
12  
=====  
42.43 50.49 62.40 77.49 82.56 98.25  
115.27 154.10 159.29 204.27 233.34 245.74  
267.06 274.49 290.77 301.04 311.06 320.50
```

331.48 338.27 348.67 363.04 370.95 385.27  
401.00 408.53 470.12 519.46 532.62 541.43  
544.73 609.00 642.61 670.00 776.79 800.04  
861.50 899.74 943.80 947.61 953.87 985.23  
1000.31 1022.36 1044.21 1051.13 1078.33 1149.13  
1231.76 1242.58 1257.77 1282.81 1292.96 1322.66  
1363.15 1411.70 1418.33 1448.79 1450.75 1487.18  
1495.02 1503.59 1508.93 1517.94 1527.19 1540.45  
1576.54 1600.22 1612.37 1641.13 1664.75 3011.05  
3016.04 3031.40 3042.44 3080.77 3088.81 3100.37  
3117.58 3121.89 3129.08 3148.04 3172.07 3177.46  
3273.95 3680.40 3709.25 3765.64 3845.85 3893.26

=====  
**olefin**  
=====

47.26 65.69 71.56 140.68 222.72 231.00  
266.03 282.90 301.80 311.65 337.97 366.71  
371.12 392.10 443.49 510.83 520.93 579.90  
689.28 771.00 792.14 871.36 934.72 938.41  
951.82 964.24 973.17 1014.14 1044.65 1049.53  
1050.62 1084.69 1167.89 1215.66 1233.08 1260.38  
1278.60 1305.71 1323.90 1378.48 1400.77 1406.54  
1438.62 1468.14 1490.65 1500.43 1509.40 1510.63  
1513.89 1524.40 1542.62 1547.12 1727.08 1747.89  
3015.95 3022.68 3036.66 3040.68 3063.36 3087.88  
3099.57 3106.90 3108.41 3117.10 3124.06 3139.57  
3150.67 3206.54 3658.62

=====  
**10m**  
=====

31.59 103.02 168.25  
210.50 216.41 263.41 269.85 311.59 313.90  
332.52 339.11 387.92 468.20 503.70 516.07  
603.90 700.19 755.17 793.35 841.03 878.75  
899.97 920.17 942.21 956.11 974.55 979.70  
1047.43 1050.63 1074.49 1093.94 1145.74 1224.14  
1227.35 1238.21 1250.33 1263.27 1306.28 1326.15  
1358.07 1401.90 1410.84 1415.09 1419.19 1454.40  
1492.08 1493.12 1499.23 1502.44 1505.32 1516.05  
1522.11 1524.91 1538.94 1570.20 1680.90 3041.73  
3063.01 3065.20 3080.64 3085.79 3100.84 3111.28  
3138.80 3140.50 3141.46 3146.29 3148.03 3158.76  
3162.39 3182.76 3609.13

## 7. References

- (1) Xie, W.; Zhao, M.; Cui, C. Cesium Carbonate-Catalyzed Reduction of Amides with Hydrosilanes. *Organometallics* **2013**, *32* (24), 7440–7444. <https://doi.org/10.1021/om400951n>.
- (2) Topczewski, J. J.; Cabrera, P. J.; Saper, N. I.; Sanford, M. S. Palladium-Catalysed Transannular C–H Functionalization of Alicyclic Amines. *Nature* **2016**, *531* (7593), 220–224. <https://doi.org/10.1038/nature16957>.
- (3) Roque, J. B.; Kuroda, Y.; Göttemann, L. T.; Sarpong, R. Deconstructive Diversification of Cyclic Amines. *Nature* **2018**, *564* (7735), 244–248. <https://doi.org/10.1038/s41586-018-0700-3>.
- (4) Seebach, D.; Lohmann, J.-J.; Syfrig, M. A.; Yoshifuji, M. Alkylation of the Isoquinoline Skeleton in the 1-Position: Lithiated 2-Pivaloyl- and 2-Bis(Dimethylamino)-Phosphinoyl-1,2,3,4-Tetrahydroisoquinolines. *Tetrahedron* **1983**, *39* (12), 1963–1974. [https://doi.org/10.1016/S0040-4020\(01\)91914-3](https://doi.org/10.1016/S0040-4020(01)91914-3).
- (5) Rao, Y.; Li, X.; Danishefsky, S. J. Thio FCMA Intermediates as Strong Acyl Donors: A General Solution to the Formation of Complex Amide Bonds. *J. Am. Chem. Soc.* **2009**, *131* (36), 12924–12926. <https://doi.org/10.1021/ja906005j>.
- (6) Metternich, J. B.; Sagebiel, S.; Lückener, A.; Lamping, S.; Ravoo, B. J.; Gilmour, R. Covalent Immobilization of (–)-Riboflavin on Polymer Functionalized Silica Particles: Application in the Photocatalytic E→Z Isomerization of Polarized Alkenes. *Chem. – Eur. J.* **2018**, *24* (17), 4228–4233. <https://doi.org/10.1002/chem.201800231>.
- (7) Vasilopoulos, A.; Krska, S. W.; Stahl, S. S. C(Sp<sup>3</sup>)–H Methylation Enabled by Peroxide Photosensitization and Ni-Mediated Radical Coupling. *Science* **2021**, *372* (6540), 398–403. <https://doi.org/10.1126/science.abh2623>.
- (8) Kochi, J. K. Mechanisms of Organic Oxidation and Reduction by Metal Complexes. *Science* **1967**, *155* (3761), 415–424. <https://doi.org/10.1126/science.155.3761.415>.
- (9) Frisch, M. J.; Trucks, G. W.; Schlegel, H. B.; Scuseria, G. E.; Robb, M. A.; Cheeseman, J. R.; Scalmani, G.; Barone, V.; Petersson, G. A.; Nakatsuji, H.; Li, X.; Caricato, M.; Marenich, A. V.; Bloino, J.; Janesko, B. G.; Gomperts, R.; Mennucci, B.; Hratchian, H. P.; Ortiz, J. V.; Izmaylov, A. F.; Sonnenberg, J. L.; Williams-Young, D.; Ding, F.; Lipparini, F.; Egidi, F.; Goings, J.; Peng, B.; Petrone, A.; Henderson, T.; Ranasinghe, D.; Zakrzewski, V. G.; Gao, J.; Rega, N.; Zheng, G.; Liang, W.; Hada, M.; Ehara, M.; Toyota, K.; Fukuda, R.; Hasegawa, J.; Ishida, M.; Nakajima, T.; Honda, Y.; Kitao, O.; Nakai, H.; Vreven, T.; Throssell, K.; Montgomery, J. A., Jr.; Peralta, J. E.; Ogliaro, F.; Bearpark, M. J.; Heyd, J. J.; Brothers, E. N.; Kudin, K. N.; Staroverov, V. N.; Keith, T. A.; Kobayashi, R.; Normand, J.; Raghavachari, K.; Rendell, A. P.; Burant, J. C.; Iyengar, S. S.; Tomasi, J.; Cossi, M.; Millam, J. M.; Klene, M.; Adamo, C.; Cammi, R.; Ochterski, J. W.; Martin, R. L.; Morokuma, K.; Farkas, O.; Foresman, J. B.; Fox, D. J. Gaussian 16, Revision C.01, 2016.
- (10) Hay, P. J.; Wadt, W. R. Ab Initio Effective Core Potentials for Molecular Calculations. Potentials for the Transition Metal Atoms Sc to Hg. *J. Chem. Phys.* **1985**, *82* (1), 270–283. <https://doi.org/10.1063/1.448799>.
- (11) Hay, P. J.; Wadt, W. R. Ab Initio Effective Core Potentials for Molecular Calculations. Potentials for K to Au Including the Outermost Core Orbitals. *J. Chem. Phys.* **1985**, *82* (1), 299–310. <https://doi.org/10.1063/1.448975>.
- (12) Wadt, W. R.; Hay, P. J. Ab Initio Effective Core Potentials for Molecular Calculations. Potentials for Main Group Elements Na to Bi. *J. Chem. Phys.* **1985**, *82* (1), 284–298. <https://doi.org/10.1063/1.448800>.
- (13) Becke, A. D. Density-Functional Exchange-Energy Approximation with Correct Asymptotic Behavior. *Phys. Rev. A* **1988**, *38* (6), 3098–3100. <https://doi.org/10.1103/PhysRevA.38.3098>.
- (14) Lee, C.; Yang, W.; Parr, R. G. Development of the Colle-Salvetti Correlation-Energy Formula into a Functional of the Electron Density. *Phys. Rev. B* **1988**, *37* (2), 785–789. <https://doi.org/10.1103/PhysRevB.37.785>.
- (15) Becke, A. D. A New Mixing of Hartree–Fock and Local Density-functional Theories. *J. Chem. Phys.* **1993**, *98* (2), 1372–1377. <https://doi.org/10.1063/1.464304>.
- (16) Grimme, S.; Antony, J.; Ehrlich, S.; Krieg, H. A Consistent and Accurate Ab Initio Parametrization of Density Functional Dispersion Correction (DFT-D) for the 94 Elements H–Pu. *J. Chem. Phys.* **2010**, *132* (15), 154104. <https://doi.org/10.1063/1.3382344>.
- (17) Becke, A. D.; Johnson, E. R. A Density-Functional Model of the Dispersion Interaction. *J. Chem. Phys.* **2005**,

- 123 (15), 154101. <https://doi.org/10.1063/1.2065267>.
- (18) Becke, A. D.; Johnson, E. R. Exchange-Hole Dipole Moment and the Dispersion Interaction. *J. Chem. Phys.* **2005**, *122* (15), 154104. <https://doi.org/10.1063/1.1884601>.
- (19) Johnson, E. R.; Becke, A. D. A Post-Hartree-Fock Model of Intermolecular Interactions: Inclusion of Higher-Order Corrections. *J. Chem. Phys.* **2006**, *124* (17), 174104. <https://doi.org/10.1063/1.2190220>.
- (20) Barone, V.; Cossi, M. Quantum Calculation of Molecular Energies and Energy Gradients in Solution by a Conductor Solvent Model. *J. Phys. Chem. A* **1998**, *102* (11), 1995–2001. <https://doi.org/10.1021/jp9716997>.
- (21) Cossi, M.; Rega, N.; Scalmani, G.; Barone, V. Energies, Structures, and Electronic Properties of Molecules in Solution with the C-PCM Solvation Model. *J. Comput. Chem.* **2003**, *24* (6), 669–681. <https://doi.org/10.1002/jcc.10189>.
- (22) Burke, K.; Werschnik, J.; Gross, E. K. U. Time-Dependent Density Functional Theory: Past, Present, and Future. *J. Chem. Phys.* **2005**, *123* (6), 062206. <https://doi.org/10.1063/1.1904586>.
- (23) Haines, B. E.; Musaev, D. G. Hydrogen-Bonding as a Factor to Determine the Regioselectivity for Pd-Mediated C–H Activation of Pyridine. *ChemCatChem* **2021**, *13* (4), 1201–1206. <https://doi.org/10.1002/cctc.202001658>.
- (24) McLarney, B. D.; Hanna, S.; Musaev, D. G.; France, S. Predictive Model for the [Rh<sub>2</sub>(Esp)<sub>2</sub>]-Catalyzed Intermolecular C(Sp<sup>3</sup>)–H Bond Insertion of  $\beta$ -Carbonyl Ester Carbenes: Interplay between Theory and Experiment. *ACS Catal.* **2019**, *9* (5), 4526–4538. <https://doi.org/10.1021/acscatal.9b00889>.
- (25) Sperger, T.; Sanhueza, I. A.; Kalvet, I.; Schoenebeck, F. Computational Studies of Synthetically Relevant Homogeneous Organometallic Catalysis Involving Ni, Pd, Ir, and Rh: An Overview of Commonly Employed DFT Methods and Mechanistic Insights. *Chem. Rev.* **2015**, *115* (17), 9532–9586. <https://doi.org/10.1021/acs.chemrev.5b00163>.
- (26) Ahn, S.; Hong, M.; Sundararajan, M.; Ess, D. H.; Baik, M.-H. Design and Optimization of Catalysts Based on Mechanistic Insights Derived from Quantum Chemical Reaction Modeling. *Chem. Rev.* **2019**, *119* (11), 6509–6560. <https://doi.org/10.1021/acs.chemrev.9b00073>.
- (27) Parr, R. G.; Weitao, Y. *Density-Functional Theory of Atoms and Molecules*; International Series of Monographs on Chemistry; Oxford University Press: New York, 1995. <https://doi.org/10.1093/oso/9780195092769.001.0001>.
- (28) Frisch, M. J.; Trucks, G. W.; Schlegel, H. B.; Scuseria, G. E.; Robb, M. A.; Cheeseman, J. R.; Scalmani, G.; Barone, V.; Mennucci, B.; Petersson, G. A.; Nakatsuji, H.; Caricato, M.; Li, X.; Hratchian, H. P.; Izmaylov, A. F.; Bloino, J.; Zheng, G.; Sonnenberg, J. L.; Hada, M.; Ehara, M.; Toyota, K.; Fukuda, R.; Hasegawa, J.; Ishida, M.; Nakajima, T.; Honda, Y.; Kitao, O.; Nakai, H.; Vreven, T.; Montgomery, J. A., Jr.; Peralta, J. E.; Ogliaro, F.; Bearpark, M. J.; Heyd, J. J.; Brothers, E. N.; Kudin, K. N.; Staroverov, V. N.; Keith, T. A.; Kobayashi, R.; Normand, J.; Raghavachari, K.; Rendell, A. P.; Burant, J. C.; Iyengar, S. S.; Tomasi, J.; Cossi, M.; Rega, N.; Millam, J. M.; Klene, M.; Knox, J. E.; Cross, J. B.; Bakken, V.; Adamo, C.; Jaramillo, J.; Gomperts, R.; Stratmann, R. E.; Yazyev, O.; Austinm, A. J.; Cammi, R.; Pomelli, C.; Ochterski, J. W.; Martin, R. L.; Morokuma, K.; Zakrzewski, V. G.; Voth, G. A.; Salvador, P.; Dannesberg, J. J.; Dapprich, S.; Daniels, A. D.; Farkas, O.; Foresman, J. B.; Ortiz, J. V.; Cioslowski, J.; Fox, D. J. Gaussian 09, Revision D.01, 2013.
- (29) Slater, J. C. *Quantum Theory of Molecules and Solids. Vol. 4. Vol. 4.*; McGraw-Hill: New York, NY, 1974.
- (30) Vosko, S. H.; Wilk, L.; Nusair, M. Accurate Spin-Dependent Electron Liquid Correlation Energies for Local Spin Density Calculations: A Critical Analysis. *Can. J. Phys.* **1980**, *58* (8), 1200–1211. <https://doi.org/10.1139/p80-159>.
- (31) Becke, A. D. Density-functional Thermochemistry. III. The Role of Exact Exchange. *J. Chem. Phys.* **1993**, *98* (7), 5648–5652. <https://doi.org/10.1063/1.464913>.
- (32) Grimme, S.; Ehrlich, S.; Goerigk, L. Effect of the Damping Function in Dispersion Corrected Density Functional Theory. *J. Comput. Chem.* **2011**, *32* (7), 1456–1465. <https://doi.org/10.1002/jcc.21759>.
- (33) Ditchfield, R.; Hehre, W. J.; Pople, J. A. Self-Consistent Molecular-Orbital Methods. IX. An Extended Gaussian-Type Basis for Molecular-Orbital Studies of Organic Molecules. *J. Chem. Phys.* **1971**, *54* (2), 724–728. <https://doi.org/10.1063/1.1674902>.
- (34) Hehre, W. J.; Pople, J. A. Self-Consistent Molecular Orbital Methods. XIII. An Extended Gaussian-Type Basis for Boron. *J. Chem. Phys.* **1972**, *56* (8), 4233–4234. <https://doi.org/10.1063/1.1677844>.
- (35) Binkley, J. S.; Pople, J. A. Self-consistent Molecular Orbital Methods. XIX. Split-valence Gaussian-type

- Basis Sets for Beryllium. *J. Chem. Phys.* **1977**, *66* (2), 879–880. <https://doi.org/10.1063/1.433929>.
- (36) Hariharan, P. C.; Pople, J. A. The Influence of Polarization Functions on Molecular Orbital Hydrogenation Energies. *Theor. Chim. Acta* **1973**, *28* (3), 213–222. <https://doi.org/10.1007/BF00533485>.
- (37) Hehre, W. J.; Ditchfield, R.; Pople, J. A. Self-Consistent Molecular Orbital Methods. XII. Further Extensions of Gaussian-Type Basis Sets for Use in Molecular Orbital Studies of Organic Molecules. *J. Chem. Phys.* **1972**, *56* (5), 2257–2261. <https://doi.org/10.1063/1.1677527>.
- (38) Francl, M. M.; Pietro, W. J.; Hehre, W. J.; Binkley, J. S.; Gordon, M. S.; DeFrees, D. J.; Pople, J. A. Self-consistent Molecular Orbital Methods. XXIII. A Polarization-type Basis Set for Second-row Elements. *J. Chem. Phys.* **1982**, *77* (7), 3654–3665. <https://doi.org/10.1063/1.444267>.
- (39) Clark, T.; Chandrasekhar, J.; Spitznagel, G. W.; Schleyer, P. V. R. Efficient Diffuse Function-Augmented Basis Sets for Anion Calculations. III. The 3-21+G Basis Set for First-Row Elements, Li–F. *J. Comput. Chem.* **1983**, *4* (3), 294–301. <https://doi.org/10.1002/jcc.540040303>.
- (40) Frisch, M. J.; Pople, J. A.; Binkley, J. S. Self-consistent Molecular Orbital Methods 25. Supplementary Functions for Gaussian Basis Sets. *J. Chem. Phys.* **1984**, *80* (7), 3265–3269. <https://doi.org/10.1063/1.447079>.
- (41) Krishnan, R.; Binkley, J. S.; Seeger, R.; Pople, J. A. Self-consistent Molecular Orbital Methods. XX. A Basis Set for Correlated Wave Functions. *J. Chem. Phys.* **1980**, *72* (1), 650–654. <https://doi.org/10.1063/1.438955>.
- (42) McLean, A. D.; Chandler, G. S. Contracted Gaussian Basis Sets for Molecular Calculations. I. Second Row Atoms, Z=11–18. *J. Chem. Phys.* **1980**, *72* (10), 5639–5648. <https://doi.org/10.1063/1.438980>.
- (43) Küchle, W.; Dolg, M.; Stoll, H.; Preuss, H. Energy-adjusted Pseudopotentials for the Actinides. Parameter Sets and Test Calculations for Thorium and Thorium Monoxide. *J. Chem. Phys.* **1994**, *100* (10), 7535–7542. <https://doi.org/10.1063/1.466847>.
- (44) Cancès, E.; Mennucci, B.; Tomasi, J. A New Integral Equation Formalism for the Polarizable Continuum Model: Theoretical Background and Applications to Isotropic and Anisotropic Dielectrics. *J. Chem. Phys.* **1997**, *107* (8), 3032–3041. <https://doi.org/10.1063/1.474659>.
